# Supplementary material for: High-throughput synthesis of stable isotope-labeled transmembrane proteins for targeted transmembrane proteomics using a wheat germ cell-free protein synthesis system
Source: Royal Society of Chemistry journal article supplement (doi:10.1039/c4mb00556b), 2014-11-18
Supplement: c4mb00556b2.xlsx [file c4mb00556b2.xlsx]

## Sheet: Table S1
Table S1. List of 263 mouse cDNA clones selected from the Riken FANTOM library for wheat germ cell-free synthesis.
#	Symbol	Class	MmEntrezGeneID	RikenID	MGIcode	QA-genespecific primer
1	Adam2	a disintegrin and metallopeptidase	11495	4932435D11	MGI:1340894	caggccgggaccgtgcgcATGTGGCTCATCTTGCTTC
2	Adam7	a disintegrin and metallopeptidase	11500	9230023H07	MGI:107247	caggccgggaccgtgcgcATGTTAACCACAGGAATAT
3	Adam8	a disintegrin and metallopeptidase	11501	E430039A18	MGI:107825	caggccgggaccgtgcgcATGCTTGGCCTCTGGCTGC
4	Adam9	a disintegrin and metallopeptidase	11502	F730001L13	MGI:105376	caggccgggaccgtgcgcATGGGGCCGCGCGCGCTCT
5	Adam15	a disintegrin and metallopeptidase	11490	I830096I06	MGI:1333882	caggccgggaccgtgcgcATGCGGCTGGCGCTGCTCT
6	Adam18	a disintegrin and metallopeptidase	13524	4922501M14	MGI:105986	caggccgggaccgtgcgcATGCCTCTGCTCTTCATAC
7	Adam21	a disintegrin and metallopeptidase	56622	4921506L22	MGI:1861229	caggccgggaccgtgcgcATGGAGTGCTTCATAATGT
8	Lepr	leptin receptor	16847	F730314F19	MGI:104993	caggccgggaccgtgcgcATGATGTGTCAGAAATTCT
9	Msr1	macrophage scavenger receptor	20288	F630005M03	MGI:98257	caggccgggaccgtgcgcATGACAAAAGAGATGACAG
10	Acvr1b	Receptor tyrosine kinases	11479	F930007E08	MGI:1338944	caggccgggaccgtgcgcATGGCGGAGTCGGCCGGAG
11	Acvr2a	Receptor tyrosine kinases	11480	A530094G04	MGI:102806	caggccgggaccgtgcgcATGGGAGCTGCTGCAAAGT
12	Acvrl1	Receptor tyrosine kinases	11482	F630206I18	MGI:1338946	caggccgggaccgtgcgcATGACCTTGGGGAGCTTCA
13	Bmpr1a	Receptor tyrosine kinases	12166	3010002B09	MGI:1338938	caggccgggaccgtgcgcATGACTCAGCTATACACTT
14	Bmpr1b	Receptor tyrosine kinases	12167	D930007I02	MGI:107191	caggccgggaccgtgcgcATGCTCTTACGAAGCTCTG
15	Epha1	Receptor tyrosine kinases	13835	4631423E11	MGI:107381	caggccgggaccgtgcgcATGGAGCGGCGCTGGCCCC
16	Epha2	Receptor tyrosine kinases	13836	G430100L02	MGI:95278	caggccgggaccgtgcgcATGGAGCTCCGGGCAGTCG
17	Epha3	Receptor tyrosine kinases	13837	B130048J04	MGI:99612	caggccgggaccgtgcgcATGGATTGTCACCTCTCCA
18	Epha4	Receptor tyrosine kinases	13838	4632410M06	MGI:98277	caggccgggaccgtgcgcATGGCTGGGATTTTCTATT
19	Epha7	Receptor tyrosine kinases	13841	5330417H08	MGI:95276	caggccgggaccgtgcgcATGGTTGTTCAAACTCGGT
20	Ephb4	Receptor tyrosine kinases	13846	B830049F06	MGI:104757	caggccgggaccgtgcgcATGGAGCTCCGAGCGCTGC
21	Ephb6	Receptor tyrosine kinases	13848	4832428L09	MGI:1096338	caggccgggaccgtgcgcATGGCTACTGAGGGCACGA
22	Erbb2	Receptor tyrosine kinases	13866	5930404N10	MGI:95410	caggccgggaccgtgcgcATGGAGCTGGCGGCCTGGT
23	Fgfr1	Receptor tyrosine kinases	14182	C530043G19	MGI:95522	caggccgggaccgtgcgcATGTGGGGCTGGAAGTGCC
24	Fgfr4	Receptor tyrosine kinases	14186	D430001L02	MGI:95525	caggccgggaccgtgcgcATGTGGCTGCTCTTGGCCC
25	Flt3	Receptor tyrosine kinases	14255	A930013I19	MGI:95559	caggccgggaccgtgcgcATGCGGGCGTTGGCGCAGC
26	Igf1r	Receptor tyrosine kinases	16001	F730313B05	MGI:96433	caggccgggaccgtgcgcATGATCTCGTGCCGAGATG
27	Insr	Receptor tyrosine kinases	16337	4932439J01	MGI:96575	caggccgggaccgtgcgcATGGACATCCGGAACAACC
28	Mst1r	Receptor tyrosine kinases	19882	E130119A05	MGI:99614	caggccgggaccgtgcgcATGGGGCTGCCTCTGCCGC
29	Ntrk2	Receptor tyrosine kinases	18212	1500040I13	MGI:97384	caggccgggaccgtgcgcATGTCGCCCTGGCTGAAGT
30	Pdgfrb	Receptor tyrosine kinases	18596	6330562L11	MGI:97531	caggccgggaccgtgcgcATGGAGGACACCATGGGGC
31	Tgfbr1	Receptor tyrosine kinases	21812	4930438I19	MGI:98728	caggccgggaccgtgcgcATGGATCTAAAGTCACTTA
32	Tie1	Receptor tyrosine kinases	21846	D330005P09	MGI:99906	caggccgggaccgtgcgcATGGTCTGGTGGGGATCCT
33	Fas	tumor necrosis factor receptor	14102	0610012D23	MGI:95484	caggccgggaccgtgcgcATGCTGTGGATCTGGGCTG
34	Tnfrsf10b	tumor necrosis factor receptor	21933	A530056N19	MGI:1341090	caggccgggaccgtgcgcATGGAGCCTCCAGGACCCA
35	Tnfrsf12a	tumor necrosis factor receptor	27279	1600023P06	MGI:1351484	caggccgggaccgtgcgcATGGCTTCGGCTTGGCCGC
36	Tnfrsf13c	tumor necrosis factor receptor	72049	2010006P15	MGI:1919299	caggccgggaccgtgcgcATGGGCGCCAGGAGACTCC
37	Tnfrsf17	tumor necrosis factor receptor	21935	9030212K17	MGI:1343050	caggccgggaccgtgcgcATGGCGCAACAGTGTTTCC
38	Tnfrsf1a	tumor necrosis factor receptor	21937	I420042M08	MGI:1314884	caggccgggaccgtgcgcATGGGTCTCCCCACCGTGC
39	Tnfrsf21	tumor necrosis factor receptor	94185	A830037A05	MGI:2151075	caggccgggaccgtgcgcATGGGGACCCGGGCAAGCA
40	Tnfrsf8	tumor necrosis factor receptor	21941	A930027B13	MGI:99908	caggccgggaccgtgcgcATGAGCGCCCTACTCACCG
41	Tnfsf10	tumor necrosis factor ligand	22035	F830228J05	MGI:107414	caggccgggaccgtgcgcATGCCTTCCTCAGGGGCCC
42	Tnfsf11	tumor necrosis factor ligand	21943	I420043E09	MGI:1100089	caggccgggaccgtgcgcATGCGCCGGGCCAGCCGAG
43	Tnfsf8	tumor necrosis factor ligand	21949	5830454L09	MGI:88328	caggccgggaccgtgcgcATGGAGCCAGGGCTGCAAC
44	Tnfsf9	tumor necrosis factor ligand	21950	F730022K13	MGI:1101058	caggccgggaccgtgcgcATGGACCAGCACACACTTG
45	Glra2	Ionotropic neurotransmitter receptors (Glycine receptor)	237213	A830014C02	MGI:95748	caggccgggaccgtgcgcATGTACCGGCAGCTAGTGA
46	Glra4	Ionotropic neurotransmitter receptors (Glycine receptor)	14657	D730029F11	MGI:95750	caggccgggaccgtgcgcATGACAACTCTTGTTCCAG
47	Glrb	Ionotropic neurotransmitter receptors (Glycine receptor)	14658	C630031F12	MGI:95751	caggccgggaccgtgcgcATGAAGTTTTCGTTGGCAA
48	Gabra1	Ionotropic neurotransmitter receptors (GABAA receptor)	14394	A330050J23	MGI:95613	caggccgggaccgtgcgcATGAAGAAAAGTCGGGGTC
49	Gabra2	Ionotropic neurotransmitter receptors (GABAA receptor)	14395	A230090O06	MGI:95614	caggccgggaccgtgcgcATGAAGACAAAATTGAGCA
50	Gabra3	Ionotropic neurotransmitter receptors (GABAA receptor)	14396	A230102D21	MGI:95615	caggccgggaccgtgcgcATGATAATCACACAAATGT
51	Gabra4	Ionotropic neurotransmitter receptors (GABAA receptor)	14397	A830035D19	MGI:95616	caggccgggaccgtgcgcATGGTTTCTGTCCAGAAGG
52	Gabra5	Ionotropic neurotransmitter receptors (GABAA receptor)	110886	C630024E08	MGI:95617	caggccgggaccgtgcgcATGGACAATGGAATGCTCT
53	Gabra6	Ionotropic neurotransmitter receptors (GABAA receptor)	14399	9630012C19	MGI:95618	caggccgggaccgtgcgcATGGTCTTGCTTCTCCCCT
54	Gabrb2	Ionotropic neurotransmitter receptors (GABAA receptor)	14401	G630033P17	MGI:95620	caggccgggaccgtgcgcATGTGGAGAGTCCGGAAAA
55	Gabrb3	Ionotropic neurotransmitter receptors (GABAA receptor)	14402	C630014N19	MGI:95621	caggccgggaccgtgcgcATGTGCTCCGGGCTCCAGG
56	Gabrg1	Ionotropic neurotransmitter receptors (GABAA receptor)	14405	A230016G13	MGI:103156	caggccgggaccgtgcgcATGGGTTCTGGGAAAGCCT
57	Gabrg2	Ionotropic neurotransmitter receptors (GABAA receptor)	14406	C230063G02	MGI:95623	caggccgggaccgtgcgcATGAGTTCGCCAAATACAT
58	Gabrp	Ionotropic neurotransmitter receptors (GABAA receptor)	216643	4732473G18	MGI:2387597	caggccgggaccgtgcgcATGAGCTACAGCCTCTATT
59	Grin1	Ionotropic neurotransmitter receptors (NMDA receptor)	14810	F930037O14	MGI:95819	caggccgggaccgtgcgcATGAGCACCATGCACCTGC
60	Grik1	Ionotropic neurotransmitter receptors (Kainate receptor)	14805	A930011N04	MGI:95814	caggccgggaccgtgcgcATGGAGCGCGGCACAGTCC
61	Grik4	Ionotropic neurotransmitter receptors (Kainate receptor)	110637	6330551K01	MGI:95817	caggccgggaccgtgcgcATGCCCCGTGTCTCCGCTC
62	Gria1	Ionotropic neurotransmitter receptors (AMPA receptor)	14799	C630033G23	MGI:95808	caggccgggaccgtgcgcATGCCGTACATCTTTGCCC
63	Gria2	Ionotropic neurotransmitter receptors (AMPA receptor)	14800	C630004I22	MGI:95809	caggccgggaccgtgcgcATGCAAAAGATTATGCATA
64	Gria3	Ionotropic neurotransmitter receptors (AMPA receptor)	53623	B130055P09	MGI:95810	caggccgggaccgtgcgcATGGGGCAAAGCGTGCTCC
65	Gria4	Ionotropic neurotransmitter receptors (AMPA receptor)	14802	6430548O20	MGI:95811	caggccgggaccgtgcgcATGAGGATTATTTGCAGGC
66	Gabrr2	Ionotropic neurotransmitter receptors (GABAC receptor)	14409	1810022E19	MGI:95626	caggccgggaccgtgcgcATGACCCTATACCTGAGGC
67	P2rx1	Ionotropic neurotransmitter receptors (P2X purinoreceptor)	18436	9530013F18	MGI:1098235	caggccgggaccgtgcgcATGGCTCGGCGGCTGCAGG
68	P2rx3	Ionotropic neurotransmitter receptors (P2X purinoreceptor)	228139	D130018N16	MGI:1097160	caggccgggaccgtgcgcATGAACTGTATATCAGACT
69	P2rx4	Ionotropic neurotransmitter receptors (P2X purinoreceptor)	18438	I830003O21	MGI:1338859	caggccgggaccgtgcgcATGGCAGGCTGCTGCTCCG
70	P2rx5	Ionotropic neurotransmitter receptors (P2X purinoreceptor)	94045	6330519I02	MGI:2137026	caggccgggaccgtgcgcATGGGCCAGGCGGCCTGGA
71	P2rxl1	Ionotropic neurotransmitter receptors (P2X purinoreceptor)	18440	C130003C22	MGI:1337113	caggccgggaccgtgcgcATGGCTTCTGCAGCCGCAG
72	P2rx7	Ionotropic neurotransmitter receptors (P2X purinoreceptor)	18439	G930020L04	MGI:1339957	caggccgggaccgtgcgcATGCCGGCTTGCTGCAGCT
73	Chrna1	Ionotropic neurotransmitter receptors (Nicotinic acetylcholine receptor)	11435	4831406G09	MGI:87885	caggccgggaccgtgcgcATGGAGCTCTCGACTGTTC
74	Chrna4	Ionotropic neurotransmitter receptors (Nicotinic acetylcholine receptor)	11438	C630019M18	MGI:87888	caggccgggaccgtgcgcATGGAGATCGGGGGCTCCG
75	Chrna5	Ionotropic neurotransmitter receptors (Nicotinic acetylcholine receptor)	110835	B430203G01	MGI:87889	caggccgggaccgtgcgcATGGCGGCGCGGGGGTCGC
76	Chrna6	Ionotropic neurotransmitter receptors (Nicotinic acetylcholine receptor)	11440	A930003O18	MGI:106213	caggccgggaccgtgcgcATGCTGAACAGCCGGGACC
77	Chrna7	Ionotropic neurotransmitter receptors (Nicotinic acetylcholine receptor)	11441	B130053C13	MGI:99779	caggccgggaccgtgcgcATGTGCGGCCGGCGGGGAG
78	Chrna9	Ionotropic neurotransmitter receptors (Nicotinic acetylcholine receptor)	231252	2410015I05	MGI:1202403	caggccgggaccgtgcgcATGAACCGGCCCCATCCCT
79	Chrnb1	Ionotropic neurotransmitter receptors (Nicotinic acetylcholine receptor)	11443	E130319G09	MGI:87890	caggccgggaccgtgcgcATGGCCTTAGGGGCGCTGC
80	Chrng	Ionotropic neurotransmitter receptors (Nicotinic acetylcholine receptor)	11449	4833406K16	MGI:87895	caggccgggaccgtgcgcATGCAAGGGGGCCAGAGAC
81	Chrm1	G protein-coupled receptors (Acetylcholine (muscarinic) receptors)	12669	C030026C22	MGI:88396	caggccgggaccgtgcgcATGAACACCTCAGTGCCCC
82	Chrm3	G protein-coupled receptors (Acetylcholine (muscarinic) receptors)	12671	B430217G05	MGI:88398	caggccgggaccgtgcgcATGACCTTGCACAGTAACA
83	Adora1	G protein-coupled receptors (Adenosine and adenine nucleotide receptors)	11539	B230308E16	MGI:99401	caggccgggaccgtgcgcATGCCGCCGTACATCTCGG
84	Adora2b	G protein-coupled receptors (Adenosine and adenine nucleotide receptors)	11541	A930102O14	MGI:99403	caggccgggaccgtgcgcATGCAGCTAGAGACGCAAG
85	Adora3	G protein-coupled receptors (Adenosine and adenine nucleotide receptors)	11542	2900016D13	MGI:104847	caggccgggaccgtgcgcATGGAAGCCGACAACACCA
86	Gpr174	G protein-coupled receptors (Adenosine and adenine nucleotide receptors)	213439	F830013K02	MGI:2685222	caggccgggaccgtgcgcATGACTGATAATTTTACAT
87	P2ry1	G protein-coupled receptors (Adenosine and adenine nucleotide receptors)	18441	9830141G17	MGI:105049	caggccgggaccgtgcgcATGACCGAGGTGCCTTGGT
88	P2ry10	G protein-coupled receptors (Adenosine and adenine nucleotide receptors)	78826	5830408N17	MGI:1926076	caggccgggaccgtgcgcATGGGCAGCAAAAGTACCA
89	P2ry12	G protein-coupled receptors (Adenosine and adenine nucleotide receptors)	70839	9030207C05	MGI:1918089	caggccgggaccgtgcgcATGGATGTGCCTGGTGTCA
90	P2ry13	G protein-coupled receptors (Adenosine and adenine nucleotide receptors)	74191	C630032C12	MGI:1921441	caggccgggaccgtgcgcATGCTCGGGACAATCAACA
91	P2ry14	G protein-coupled receptors (Adenosine and adenine nucleotide receptors)	140795	A330108O13	MGI:2155705	caggccgggaccgtgcgcATGAACAACTCCACCACCA
92	P2ry2	G protein-coupled receptors (Adenosine and adenine nucleotide receptors)	18442	1300015C04	MGI:105107	caggccgggaccgtgcgcATGGCAGCAGACCTGGAAC
93	P2ry4	G protein-coupled receptors (Adenosine and adenine nucleotide receptors)	57385	4732468D08	MGI:1926594	caggccgggaccgtgcgcATGACCAGTGCAGACTCCT
94	P2ry6	G protein-coupled receptors (Adenosine and adenine nucleotide receptors)	233571	D730047N04	MGI:2673874	caggccgggaccgtgcgcATGGAGCAGGACAATGGCA
95	Gpr18	G protein-coupled receptors (Arachidonyl glycine receptors)	110168	F830206E07	MGI:107859	caggccgggaccgtgcgcATGGCCACCCTGAGCAATC
96	Bdkrb2	G protein-coupled receptors (Bradykinin receptors)	12062	4732437P05	MGI:102845	caggccgggaccgtgcgcATGCCCTGCTCCTGGAAGC
97	Cnr1	G protein-coupled receptors (Cannabinoids receptors)	12801	A830055B12	MGI:104615	caggccgggaccgtgcgcATGAAGTCGATCTTAGACG
98	Cnr2	G protein-coupled receptors (Cannabinoids receptors)	12802	9830147G02	MGI:104650	caggccgggaccgtgcgcATGGAGGGATGCCGGGAGA
99	Adra1a	G protein-coupled receptors (Adrenergic receptors)	11549	A330054N11	MGI:104773	caggccgggaccgtgcgcATGGTGCTTCTTTCTGAAA
100	Adrb2	G protein-coupled receptors (Adrenergic receptors)	11555	2310002E14	MGI:87938	caggccgggaccgtgcgcATGGGGCCACACGGGAACG
101	Adrb3	G protein-coupled receptors (Adrenergic receptors)	11556	F430106H21	MGI:87939	caggccgggaccgtgcgcATGGCTCCGTGGCCTCACA
102	Agtr1b	G protein-coupled receptors (Angiotensin receptors)	11608	E030037D05	MGI:87965	caggccgggaccgtgcgcATGATCCTTAACTCTTCTA
103	Agtr2	G protein-coupled receptors (Angiotensin receptors)	11609	D930022A02	MGI:87966	caggccgggaccgtgcgcATGAAGGACAACTTCAGTT
104	Ccr1	G protein-coupled receptors (Chemokines and chemotactic factors receptors)	12768	9830138O07	MGI:104618	caggccgggaccgtgcgcATGGAGATTTCAGATTTCA
105	Ccr2	G protein-coupled receptors (Chemokines and chemotactic factors receptors)	12772	B430108F19	MGI:106185	caggccgggaccgtgcgcATGGAAGACAATAATATGT
106	Ccr3	G protein-coupled receptors (Chemokines and chemotactic factors receptors)	12771	F830047J12	MGI:104616	caggccgggaccgtgcgcATGGCATTCAACACAGATG
107	Ccr5	G protein-coupled receptors (Chemokines and chemotactic factors receptors)	12774	F730044M13	MGI:107182	caggccgggaccgtgcgcATGGATTTTCAAGGGTCAG
108	Ccr6	G protein-coupled receptors (Chemokines and chemotactic factors receptors)	12458	F830010E07	MGI:1333797	caggccgggaccgtgcgcATGAATTCCACAGAGTCCT
109	Ccr7	G protein-coupled receptors (Chemokines and chemotactic factors receptors)	12775	A130067M15	MGI:103011	caggccgggaccgtgcgcATGGACCCAGGGAAACCCA
110	Ccr9	G protein-coupled receptors (Chemokines and chemotactic factors receptors)	12769	C920018E12	MGI:1341902	caggccgggaccgtgcgcATGATGCCCACAGAACTCA
111	Gpr2	G protein-coupled receptors (Chemokines and chemotactic factors receptors)	12777	G430074B03	MGI:1096320	caggccgggaccgtgcgcATGGGGACCAAGCCCACAG
112	Ccrl1	G protein-coupled receptors (Chemokines and chemotactic factors receptors)	252837	5430400N11	MGI:2181676	caggccgggaccgtgcgcATGGCTCTGGAGCTGAACC
113	Ccrl2	G protein-coupled receptors (Chemokines and chemotactic factors receptors)	54199	1810047I05	MGI:1920904	caggccgggaccgtgcgcATGGATAACTACACAGTGG
114	Cx3cr1	G protein-coupled receptors (Chemokines and chemotactic factors receptors)	13051	A930022K01	MGI:1333815	caggccgggaccgtgcgcATGTCCACCTCCTTCCCTG
115	Blr1	G protein-coupled receptors (Chemokines and chemotactic factors receptors)	12145	F830004L07	MGI:103567	caggccgggaccgtgcgcATGAACTACCCACTAACCC
116	Cxcr6	G protein-coupled receptors (Chemokines and chemotactic factors receptors)	80901	D830030F09	MGI:1934582	caggccgggaccgtgcgcATGGATGATGGGCATCAAG
117	Xcr1	G protein-coupled receptors (Chemokines and chemotactic factors receptors)	23832	A530032M21	MGI:1346338	caggccgggaccgtgcgcATGGAGTCCTCTACAGCCT
118	Cckar	G protein-coupled receptors (Cholecystokinin / gastrin receptors)	12425	1200012O13	MGI:99478	caggccgggaccgtgcgcATGGATGTGGTCGACAGCC
119	Cckbr	G protein-coupled receptors (Cholecystokinin / gastrin receptors)	12426	E130008P03	MGI:99479	caggccgggaccgtgcgcATGGATCTGCTCAAGCTGA
120	Ednra	G protein-coupled receptors (Endothelin receptors)	13617	A730071B21	MGI:105923	caggccgggaccgtgcgcATGAGTATCTTTTGCCTTG
121	Ednrb	G protein-coupled receptors (Endothelin receptors)	13618	D630038G12	MGI:102720	caggccgggaccgtgcgcATGCAATCGCCCGCAAGCC
122	Hrh1	G protein-coupled receptors (Histamine receptors)	15465	6720430L06	MGI:107619	caggccgggaccgtgcgcATGAGCCTTCCCAACACCT
123	Hrh2	G protein-coupled receptors (Histamine receptors)	15466	9130001K16	MGI:108482	caggccgggaccgtgcgcATGGAGCCCAATGGCACGG
124	Hrh3	G protein-coupled receptors (Histamine receptors)	99296	B530005H20	MGI:2139279	caggccgggaccgtgcgcATGGGCGGCTGGCTCATCG
125	Oxgr1	G protein-coupled receptors (Krebs cycle intermediates receptors)	239283	D630004A02	MGI:2685145	caggccgggaccgtgcgcATGATTGAGCCACTGGACA
126	Sucnr1	G protein-coupled receptors (Krebs cycle intermediates receptors)	84112	B430012O21	MGI:1934135	caggccgggaccgtgcgcATGGCACAGAATTTATCTT
127	Gpr24	G protein-coupled receptors (Melanin-concentrating hormone receptors)	207911	6430411D18	MGI:2180756	caggccgggaccgtgcgcATGGATCTGCAAGCCTCGT
128	Mc2r	G protein-coupled receptors (Melanocortins receptors)	17200	8030422J23	MGI:96928	caggccgggaccgtgcgcATGAAGCATATTATCAATT
129	Edg2	G protein-coupled receptors (Lysolipids receptors )	14745	5031439C20	MGI:108429	caggccgggaccgtgcgcATGGCAGCTGCCTCTACTT
130	Edg4	G protein-coupled receptors (Lysolipids receptors )	53978	D030069A17	MGI:1858422	caggccgggaccgtgcgcATGGGCCAGTGCTACTACA
131	Edg7	G protein-coupled receptors (Lysolipids receptors )	65086	A630056N02	MGI:1929469	caggccgggaccgtgcgcATGAATGAGTGTCACTATG
132	Gpr23	G protein-coupled receptors (Lysolipids receptors )	78134	B130055L15	MGI:1925384	caggccgggaccgtgcgcATGGGTGACAGAAGATTTA
133	Edg1	G protein-coupled receptors (Lysolipids receptors )	13609	1200004B16	MGI:1096355	caggccgggaccgtgcgcATGGTGTCCACTAGCATCC
134	Edg5	G protein-coupled receptors (Lysolipids receptors )	14739	D430039A03	MGI:99569	caggccgggaccgtgcgcATGGGCGGCTTATACTCAG
135	Edg3	G protein-coupled receptors (Lysolipids receptors )	13610	E030029K08	MGI:1339365	caggccgggaccgtgcgcATGGCAACCACGCATGCGC
136	Edg6	G protein-coupled receptors (Lysolipids receptors )	13611	F630011K01	MGI:1333809	caggccgggaccgtgcgcATGAACATCAGTACCTGGT
137	Gpr65	G protein-coupled receptors (Lysolipids receptors)	14744	5830442J07	MGI:108031	caggccgggaccgtgcgcATGGCGATGAACAGGATGT
138	Gpr6	G protein-coupled receptors (Lysolipids receptors)	140741	A830030P14	MGI:2155249	caggccgggaccgtgcgcATGAACGCTAGCGCCGCCG
139	Npy1r	G protein-coupled receptors (Neuropeptide Y receptors)	18166	4222404E21	MGI:104963	caggccgggaccgtgcgcATGAACTCAACTCTGTTCT
140	Npy2r	G protein-coupled receptors (Neuropeptide Y receptors)	18167	C630007L14	MGI:108418	caggccgggaccgtgcgcATGGGCCCGGTAGGTGCAG
141	Npy5r	G protein-coupled receptors (Neuropeptide Y receptors)	18168	B230213K17	MGI:108082	caggccgggaccgtgcgcATGGAGGTTAAACTTGAAG
142	Npy6r	G protein-coupled receptors (Neuropeptide Y receptors)	18169	5031404D23	MGI:1098590	caggccgggaccgtgcgcATGGAAGTGCTCACAAACC
143	Ppyr1	G protein-coupled receptors (Neuropeptide Y receptors)	19065	9530057L11	MGI:105374	caggccgggaccgtgcgcATGAATACCTCTCATTTCT
144	Ntsr2	G protein-coupled receptors (Neurotensin receptors)	18217	K530014G20	MGI:108018	caggccgggaccgtgcgcATGGAGACCAGCAGCCTGT
145	Oprd1	G protein-coupled receptors (Opioid peptides receptors)	18386	A830044L10	MGI:97438	caggccgggaccgtgcgcATGGAGCTGGTGCCCTCTG
146	Oprm1	G protein-coupled receptors (Opioid peptides receptors)	18390	A230002D02	MGI:97441	caggccgggaccgtgcgcATGGACAGCAGCGCCGGCC
147	Rho	G protein-coupled receptors (Opsins)	212541	A930011G12	MGI:97914	caggccgggaccgtgcgcATGAACGGCACAGAGGGCC
148	Hcrtr1	G protein-coupled receptors (Orexins receptors)	230777	B230311G09	MGI:2385650	caggccgggaccgtgcgcATGGAACCCTCGGCCACTC
149	Hcrtr2	G protein-coupled receptors (Orexins receptors)	387285	C230065B06	MGI:2680765	caggccgggaccgtgcgcATGTCCAGCACCAAACTGG
150	Ptger2	G protein-coupled receptors (Prostanoids receptors)	19217	E230022J02	MGI:97794	caggccgggaccgtgcgcATGGACAATTTTCTTAATG
151	Trhr	G protein-coupled receptors (Releasing hormones receptors)	22045	6330439E06	MGI:98824	caggccgggaccgtgcgcATGGAGAATGATACTGTCA
152	Htr1a	G protein-coupled receptors (Serotonin receptors)	15550	9330141D13	MGI:96273	caggccgggaccgtgcgcATGGATATGTTCAGTCTTG
153	Htr1d	G protein-coupled receptors (Serotonin receptors)	15552	C130095B09	MGI:96276	caggccgggaccgtgcgcATGTCTCCTCCAAACCAGT
154	Htr2a	G protein-coupled receptors (Serotonin receptors)	15558	E030013E04	MGI:109521	caggccgggaccgtgcgcATGGAAATTCTCTGTGAAG
155	Htr2b	G protein-coupled receptors (Serotonin receptors)	15559	9130230B07	MGI:109323	caggccgggaccgtgcgcATGGCTTCATCTTATAAAA
156	Htr2c	G protein-coupled receptors (Serotonin receptors)	15560	A330095H19	MGI:96281	caggccgggaccgtgcgcATGGTGAACCTGGGCACTG
157	Htr3b	G protein-coupled receptors (Serotonin receptors)	57014	D530019I20	MGI:1861899	caggccgggaccgtgcgcATGATTCTTCTGTGGTCCT
158	Htr7	G protein-coupled receptors (Serotonin receptors)	15566	A730064F17	MGI:99841	caggccgggaccgtgcgcATGATGGACGTTAACAGCA
159	Sstr1	G protein-coupled receptors (Somatostatin and urotensin receptors)	20605	B230396D21	MGI:98327	caggccgggaccgtgcgcATGTTCCCCAATGGCACCG
160	Sstr4	G protein-coupled receptors (Somatostatin and urotensin receptors)	20608	D130013H04	MGI:105372	caggccgggaccgtgcgcATGAACGCGCCAGCAACTC
161	Gpr3	G protein-coupled receptors (Orphan)	14748	K530006I19	MGI:101908	caggccgggaccgtgcgcATGATGTGGGGAGCAGGAA
162	Gpr4	G protein-coupled receptors (Orphan)	319197	D830014M20	MGI:2441992	caggccgggaccgtgcgcATGGACAACAGCACGGGCA
163	Gpr12	G protein-coupled receptors (Orphan)	14738	B230396J03	MGI:101909	caggccgggaccgtgcgcATGAACGAAGACCCGAAGG
164	Gpr19	G protein-coupled receptors (Orphan)	14760	C130013P12	MGI:892973	caggccgggaccgtgcgcATGGATAACGACCAGCCGC
165	Gpr20	G protein-coupled receptors (Orphan)	239530	A430106B11	MGI:2441803	caggccgggaccgtgcgcATGCCCTCTGCGTTGTCTA
166	Gpr21	G protein-coupled receptors (Orphan)	338346	C230004C13	MGI:2441890	caggccgggaccgtgcgcATGAACTCCACCTGGGATG
167	Gpr22	G protein-coupled receptors (Orphan)	73010	9330162L13	MGI:1920260	caggccgggaccgtgcgcATGTGTTTTTCTCCTGTTC
168	Gpr26	G protein-coupled receptors (Orphan)	233919	9630036A11	MGI:2441758	caggccgggaccgtgcgcATGAACTCGTGGGACGCGG
169	Gpr34	G protein-coupled receptors (Orphan)	23890	A330055E22	MGI:1346334	caggccgggaccgtgcgcATGACTACTACTTCAGTTG
170	Gpr35	G protein-coupled receptors (Orphan)	64095	9430051L15	MGI:1929509	caggccgggaccgtgcgcATGAATAGTACAACCTGTA
171	Gpr37	G protein-coupled receptors (Orphan)	14763	6430580C01	MGI:1313297	caggccgggaccgtgcgcATGCCAGCCCGGGGCGCGC
172	Gpr37l1	G protein-coupled receptors (Orphan)	171469	F930049N24	MGI:1928503	caggccgggaccgtgcgcATGCGGTGGCTGTGGCCCC
173	Gpr39	G protein-coupled receptors (Orphan)	71111	4933415E13	MGI:1918361	caggccgggaccgtgcgcATGCCCAATCAGATCCGAC
174	Gpr45	G protein-coupled receptors (Orphan)	93690	A330105L23	MGI:2135882	caggccgggaccgtgcgcATGGCCTGTAACAGCACAC
175	Gpr48	G protein-coupled receptors (Orphan)	107515	9130225G07	MGI:1891468	caggccgggaccgtgcgcATGATTCGCCTTACAGTGT
176	Gpr55	G protein-coupled receptors (Orphan)	227326	I920012I16	MGI:2685064	caggccgggaccgtgcgcATGAGCCAGCCAGAGCGTG
177	Gpr63	G protein-coupled receptors (Orphan)	81006	9630048O08	MGI:2135884	caggccgggaccgtgcgcATGGTTGTCTCAGGAGTGT
178	Gpr75	G protein-coupled receptors (Orphan)	237716	C630044J09	MGI:2441843	caggccgggaccgtgcgcATGAACACAAGTGCCCCGC
179	Gpr82	G protein-coupled receptors (Orphan)	319200	9230105E02	MGI:2441734	caggccgggaccgtgcgcATGACTAATAACTCGACAT
180	Gpr83	G protein-coupled receptors (Orphan)	14608	A630019F13	MGI:95712	caggccgggaccgtgcgcATGAAGGTTCCTCCTGTCC
181	Gpr85	G protein-coupled receptors (Orphan)	64450	A730054N22	MGI:1927851	caggccgggaccgtgcgcATGGCGAACTATAGCCATG
182	Gpr87	G protein-coupled receptors (Orphan)	84111	A630091I03	MGI:1934133	caggccgggaccgtgcgcATGGGGCTCAACTTGACGC
183	Gpr101	G protein-coupled receptors (Orphan)	245424	A230027F20	MGI:2685211	caggccgggaccgtgcgcATGCCACCCAGCTGCACTA
184	Gpr110	G protein-coupled receptors (Orphan)	77596	D730010K01	MGI:1924846	caggccgggaccgtgcgcATGGCTCTGACTACCATGA
185	Gpr111	G protein-coupled receptors (Orphan)	435529	D930026B03	MGI:2182728	caggccgggaccgtgcgcATGCCAGGGAACATTGCTG
186	Gpr112	G protein-coupled receptors (Orphan)	236798	F530205L15	MGI:2685213	caggccgggaccgtgcgcATGAATCTCTCCATGTTCT
187	Gpr114	G protein-coupled receptors (Orphan)	382045	4732465N11	MGI:2685955	caggccgggaccgtgcgcATGGATCCACACGGCGCCC
188	Gpr115	G protein-coupled receptors (Orphan)	78249	4632435A09	MGI:1925499	caggccgggaccgtgcgcATGAAGCCCTGGATTGCCA
189	Gpr132	G protein-coupled receptors (Orphan)	56696	F830034I23	MGI:1890220	caggccgggaccgtgcgcATGAGATCAGAACCTACCA
190	Gpr135	G protein-coupled receptors (Orphan)	238252	C230024K06	MGI:2676315	caggccgggaccgtgcgcATGGAGGAGCAGGCGCGGC
191	Gpr146	G protein-coupled receptors (Orphan)	80290	B230399N13	MGI:1933113	caggccgggaccgtgcgcATGTGGAGCTGTGGCCCAC
192	Gpr149	G protein-coupled receptors (Orphan)	229357	C130053K01	MGI:2443628	caggccgggaccgtgcgcATGATGATCCACATGGTGG
193	Gpr150	G protein-coupled receptors (Orphan)	238725	C030001A19	MGI:2441872	caggccgggaccgtgcgcATGGAAGATCCTTTCAGCC
194	Gpr151	G protein-coupled receptors (Orphan)	240239	C130082O03	MGI:2441887	caggccgggaccgtgcgcATGGCAGCCAAGAGCTTGA
195	Gpr160	G protein-coupled receptors (Orphan)	71862	F630106L08	MGI:1919112	caggccgggaccgtgcgcATGACAGCTCTTTCTTCAA
196	Mas1	G protein-coupled receptors (Orphan)	17171	4933437A11	MGI:96918	caggccgggaccgtgcgcATGGACCAGTCAAATATGA
197	Mrgpre	G protein-coupled receptors (Orphan)	244238	C130069N09	MGI:2441884	caggccgggaccgtgcgcATGACGTCCCTGAGCGTGC
198	Tacr1	G protein-coupled receptors (Tachykinin receptors)	21336	A230039D24	MGI:98475	caggccgggaccgtgcgcATGGATAACGTCCTTCCTG
199	Tacr3	G protein-coupled receptors (Tachykinin receptors)	21338	6330441P07	MGI:892968	caggccgggaccgtgcgcATGGCCTCGGTTCCCACCG
200	Avpr1a	G protein-coupled receptors (Vasopressin / oxytocin receptors)	54140	F830001P20	MGI:1859216	caggccgggaccgtgcgcATGAGTTTCCCGCGAGGCT
201	Avpr1b	G protein-coupled receptors (Vasopressin / oxytocin receptors)	26361	C820007I05	MGI:1347010	caggccgggaccgtgcgcATGTTTGCTTCCACTTACA
202	Galr1	G protein-coupled receptors (other receptors)	14427	A330038E02	MGI:1096364	caggccgggaccgtgcgcATGGAACTGGCTATGGGTT
203	Galr2	G protein-coupled receptors (other receptors)	14428	E130308A09	MGI:1337018	caggccgggaccgtgcgcATGAATGGCTCGGACAGCC
204	Bai3	G protein-coupled receptors (Family 2 (B) receptors)	210933	A830096D10	MGI:2441837	caggccgggaccgtgcgcATGGAATCCTCTGGTACCC
205	Calcr	G protein-coupled receptors (Family 2 (B) receptors)	12311	A230103M05	MGI:101950	caggccgggaccgtgcgcATGACTCCAAGGAGGTCCA
206	Calcrl	G protein-coupled receptors (Family 2 (B) receptors)	54598	9530048D22	MGI:1926944	caggccgggaccgtgcgcATGGATAAAAAGCATATAC
207	Crhr1	G protein-coupled receptors (Family 2 (B) receptors)	12921	K430328J15	MGI:88498	caggccgggaccgtgcgcATGGGACAGCGCCCGCAGC
208	Crhr2	G protein-coupled receptors (Family 2 (B) receptors)	12922	D830017O21	MGI:894312	caggccgggaccgtgcgcATGGGGACCCCAGGCTCTC
209	Emr1	G protein-coupled receptors (Family 2 (B) receptors)	13733	I830033L06	MGI:106912	caggccgggaccgtgcgcATGTGGGGCTTTTGGCTGC
210	Emr4	G protein-coupled receptors (Family 2 (B) receptors)	52614	A130021A05	MGI:1196464	caggccgggaccgtgcgcATGTTGATGGGAGCAACTA
211	Gpr56	G protein-coupled receptors (Family 2 (B) receptors)	14766	E030040N19	MGI:1340051	caggccgggaccgtgcgcATGGCTGTCCAGGTGCTGC
212	Lphn3	G protein-coupled receptors (Family 2 (B) receptors)	319387	M5C1023O12	MGI:2441950	caggccgggaccgtgcgcATGCCCTGGACTCCCTACA
213	Gcgr	G protein-coupled receptors (Family 2 (B) receptors)	14527	G630052A10	MGI:99572	caggccgggaccgtgcgcATGCCCCTCACCCAGCTCC
214	Gprc5d	G protein-coupled receptors (Family 3 (C) receptors (metabotropic glutamate and calcium receptors))	93746	A030001F22	MGI:1935037	caggccgggaccgtgcgcATGTATGAGGACTGCGTGA
215	Gpr179	G protein-coupled receptors (Family 3 (C) receptors (metabotropic glutamate and calcium receptors))	217143	5330439C02	MGI:2443409	caggccgggaccgtgcgcATGGGGGCCAGAGCAGTGG
216	Gabbr1	G protein-coupled receptors (Family 3 (C) receptors (metabotropic glutamate and calcium receptors))	54393	F830019O19	MGI:1860139	caggccgggaccgtgcgcATGCTGCTGCTGCTGCTGG
217	Gpr156	G protein-coupled receptors (Family 3 (C) receptors (metabotropic glutamate and calcium receptors))	239845	D130083O04	MGI:2653880	caggccgggaccgtgcgcATGGAGCCAGAAATCAACT
218	Grm8	G protein-coupled receptors (Family 3 (C) receptors (metabotropic glutamate and calcium receptors))	14823	A230067N10	MGI:1351345	caggccgggaccgtgcgcATGGTTTGTGAGGGAAAGC
219	Gpr143	G protein-coupled receptors (Family OA)	18241	7530427O11	MGI:107193	caggccgggaccgtgcgcATGGCCTCCCCGCGCCTGG
220	Abca3	ATP-binding cassette	27410	F630103K24	MGI:1351617	caggccgggaccgtgcgcATGGCAGTGCTGCGGCAGC
221	Abcb7	ATP-binding cassette	11306	D430002E19	MGI:109533	caggccgggaccgtgcgcATGGCGCTGCTCGCGATAC
222	Abcb10	ATP-binding cassette	56199	C130076J01	MGI:1860508	caggccgggaccgtgcgcATGCGCGCCCCTTCTGCTA
223	Abcb11	ATP-binding cassette	27413	G630096B22	MGI:1351619	caggccgggaccgtgcgcATGTCTGACTCAGTGATTC
224	Abcb6	ATP-binding cassette	74104	1200005B17	MGI:1921354	caggccgggaccgtgcgcATGGTGACTGTGGGCAACT
225	Abcb8	ATP-binding cassette	74610	5330439A07	MGI:1351667	caggccgggaccgtgcgcATGTTGGTGCACTTATTTC
226	Abcg5	ATP-binding cassette	27409	C730040P06	MGI:1351659	caggccgggaccgtgcgcATGGGTGAGCTGCCCTTTC
227	Abcc1	ATP-binding cassette	17250	4931419N09	MGI:102676	caggccgggaccgtgcgcATGGCGCTGCGCAGCTTCT
228	Abcc10	ATP-binding cassette	224814	4932420J09	MGI:2386976	caggccgggaccgtgcgcATGGAGGGGCTCCTGGCCC
229	Abcc12	ATP-binding cassette	244562	4932443H13	MGI:2441679	caggccgggaccgtgcgcATGGTGGGTGAAGGCCCGT
230	Abcc8	ATP-binding cassette	20927	D130060D08	MGI:1352629	caggccgggaccgtgcgcATGCTCCGGGGCATCAAAC
231	Abcd1	ATP-binding cassette	11666	E430026B14	MGI:1349215	caggccgggaccgtgcgcATGCCGGTGCTCTCCACTC
232	Abcd2	ATP-binding cassette	26874	D130049F16	MGI:1349467	caggccgggaccgtgcgcATGATACACATGCTAAATG
233	Abcg4	ATP-binding cassette	192663	A730060B05	MGI:1890594	caggccgggaccgtgcgcATGGCGGAGAAGGCATTGG
234	Tap2	ATP-binding cassette	21355	A330105B10	MGI:98484	caggccgggaccgtgcgcATGGCGCTGTCCTACCTGA
235	Slc1a1	Solute carrier family	20510	C630003O18	MGI:105083	caggccgggaccgtgcgcATGGGGAAGCCCACGAGCT
236	Slc1a2	Solute carrier family	20511	B230212C19	MGI:101931	caggccgggaccgtgcgcATGGCATCAACAGAGGGTG
237	Slc1a3	Solute carrier family	20512	C230098A01	MGI:99917	caggccgggaccgtgcgcATGACCAAAAGCAACGGAG
238	Slc1a4	Solute carrier family	55963	A930005F17	MGI:2135601	caggccgggaccgtgcgcATGGAGAAGAGCGGCGAGA
239	Slc1a6	Solute carrier family	20513	I420008D08	MGI:1096331	caggccgggaccgtgcgcATGAGCAGCCACGGCAATA
240	Slc6a1	Solute carrier family	232333	E130318D17	MGI:95627	caggccgggaccgtgcgcATGGCGACTGACAACAGCA
241	Slc6a4	Solute carrier family	15567	7330411H24	MGI:96285	caggccgggaccgtgcgcATGCCAGCATCCACATTCT
242	Slc6a6	Solute carrier family	21366	E860106A12	MGI:98488	caggccgggaccgtgcgcATGGCCACGAAGGAGAAGC
243	Slc6a7	Solute carrier family	240332	C630033J16	MGI:2147363	caggccgggaccgtgcgcATGAAGAAGCTCCAAGAAG
244	Slc6a9	Solute carrier family	14664	C130038K02	MGI:95760	caggccgggaccgtgcgcATGGTAGGAAAAGGTGCCA
245	Slc6a13	Solute carrier family	14412	C730037J22	MGI:95629	caggccgggaccgtgcgcATGGAGAACAGGGCCTCGG
246	Slc6a14	Solute carrier family	56774	9030613J17	MGI:1890216	caggccgggaccgtgcgcATGGACAGATTGAAGTGCC
247	Slc6a15	Solute carrier family	103098	9630038L04	MGI:2143484	caggccgggaccgtgcgcATGCCTAAGAATAGCAAAG
248	Slc6a20	Solute carrier family	22599	F520006C14	MGI:1336891	caggccgggaccgtgcgcATGGAATCACCTTCAGCAC
249	Slc9a8	Solute carrier family	77031	E230029J06	MGI:1924281	caggccgggaccgtgcgcATGGCGGAGGAGGAGTTCT
250	Slc9a9	Solute carrier family	331004	9930105B05	MGI:2679732	caggccgggaccgtgcgcATGGCTGGGCAGCTTCGGT
251	Trpc3	TRP channel	22065	A830027N11	MGI:109526	caggccgggaccgtgcgcATGCGTGACAAGGGCCGGC
252	Trpc4	TRP channel	22066	A830054N02	MGI:109525	caggccgggaccgtgcgcATGGCTCAGTTCTATTACA
253	Trpc6	TRP channel	22068	5730466A02	MGI:109523	caggccgggaccgtgcgcATGAGCCAGAGCCCGAGGT
254	Trpc7	TRP channel	26946	9630052O19	MGI:1349470	caggccgggaccgtgcgcATGTTGGGGAGCAACACCT
255	Trpm1	TRP channel	17364	G370046G24	MGI:1330305	caggccgggaccgtgcgcATGTACATCCGAGTCTCCT
256	Trpm3	TRP channel	226025	D630001I02	MGI:2443101	caggccgggaccgtgcgcATGTATGTCCGAGTATCTT
257	Trpm4	TRP channel	68667	A830089H13	MGI:1915917	caggccgggaccgtgcgcATGATGCGGGGGGCCTGGA
258	Trpv2	TRP channel	22368	E430035F12	MGI:1341836	caggccgggaccgtgcgcATGACTTCAGCCTCCAACC
259	Trpv4	TRP channel	63873	C630029F01	MGI:1926945	caggccgggaccgtgcgcATGGCAGATCCTGGTGATG
260	Trpv5	TRP channel	194352	D630033B11	MGI:2429764	caggccgggaccgtgcgcATGGGGGCTAAAACTCCTT
261	Trpv6	TRP channel	64177	5031407J16	MGI:1927259	caggccgggaccgtgcgcATGGGGTGGTCCCTGCCCA
262	Adipor1	adiponectin receptor	72674	2810031L11	MGI:1919924	caggccgggaccgtgcgcATGTCTTCCCACAAAGGCT
263	Adipor2	adiponectin receptor	68465	A330081F11	MGI:93830	caggccgggaccgtgcgcATGAACGAGCCAGCCAAAC

## Sheet: Table S2
Table S2. Identification of transmembrane protein (TMP) peptides using tandem mass spectrometry (MS/MS).
(a) Tryptic peptides
#	Name	Conf (> 50)	Sequence	Modifications	Cleavages	Prec MW	Prec m/z	Theor MW	Theor m/z	Theor z
1	Adam2	97.71	AFSNCSMEDFSK	Propionamide(C)@5; Oxidation(M)@7		1451.18	726.597	1451.57	726.792	2
1	Adam2	94.51	AFSNCSMEDFSK	Propionamide(C)@5		1435.19	718.605	1435.57	718.795	2
1	Adam2	95.2	CQCGVPVCVMNPEAPHSSGVR	Propionamide(C)@1; Propionamide(C)@3; Propionamide(C)@8; Oxidation(M)@10		2397.42	800.146	2398.06	800.362	3
1	Adam2	80.89	CQCGVPVCVMNPEAPHSSGVR	Propionamide(C)@1; Propionamide(C)@3; Propionamide(C)@8		2381.35	794.791	2382.07	795.031	3
1	Adam2	99	CVADTFLGYDCNLEK	Propionamide(C)@1; Propionamide(C)@11		1831.18	916.595	1831.81	916.913	2
1	Adam2	99	FITSQSSHCLQNQPR	Propionamide(C)@9		1815.66	606.227	1815.87	606.297	3
1	Adam2	99	GGALLYAEK			920.48	461.247	920.497	461.256	2
1	Adam2	95.44	ILTTGDANK			931.476	466.745	931.497	466.756	2
1	Adam2	99	LHVQVTVPEK			1148.49	575.251	1148.66	575.335	2
1	Adam2	99	LSDGSECSSGICCNSCK	Propionamide(C)@7; Propionamide(C)@12; Propionamide(C)@13; Propionamide(C)@16		1975.03	988.52	1975.77	988.894	2
1	Adam2	99	MCDKNYAGGVALHPK	Oxidation(M)@1; Propionamide(C)@2	missed K-N@4	1689.54	564.189	1689.8	564.273	3
1	Adam2	98	MKDSYPGGSIDSGNKER	Oxidation(M)@1		1855.54	619.521	1855.84	619.62	3
1	Adam2	97.62	MKDSYPGGSIDSGNKER			1839.56	614.194	1839.84	614.288	3
1	Adam2	99	NTTDYVGATYQGK			1416.3	709.159	1416.65	709.333	2
1	Adam2	81.11	NYAGGVALHPK	Deamidated(N)@1		1126.81	564.415	1126.58	564.296	2
1	Adam2	99	SDISGSCGISAGGYK	Propionamide(C)@7		1471.28	736.646	1471.66	736.838	2
1	Adam2	99	SVTSNGYETQVTYNLK			1802.25	902.13	1802.87	902.442	2
1	Adam2	87.36	SVTSNGYETQVTYNLK			1802.57	601.863	1802.87	601.964	3
1	Adam2	99	VYSYDNAGIMR			1287.31	644.665	1287.59	644.803	2
1	Adam2	99	VYSYDNAGIMR	Oxidation(M)@10		1303.3	652.658	1303.59	652.801	2
2	Adam7	99	APYATNHSCVGLNFTK	Propionamide(C)@9		1792.71	897.365	1792.86	897.436	2
2	Adam7	99	APYATNHSCVGLNFTKK	Deamidated(N)@6; Propionamide(C)@9	missed K-K@16	1920.93	641.318	1921.94	641.652	3
2	Adam7	85.26	APYATNHSCVGLNFTKK	Propionamide(C)@9	missed K-K@16	1920.9	641.307	1920.95	641.324	3
2	Adam7	99	EFLSSNYSETYYNVK			1842.67	922.341	1842.83	922.423	2
2	Adam7	52.46	EFLSSNYSETYYNVK	Deamidated(N)@13		1844.72	923.365	1843.82	922.915	2
2	Adam7	99	FIELFVVADEYVYR			1761.74	881.878	1761.9	881.956	2
2	Adam7	98.54	FIELFVVADEYVYR			1761.74	588.253	1761.9	588.307	3
2	Adam7	99	GIVGVEGQELVHPK			1460.7	731.358	1460.8	731.407	2
2	Adam7	56.91	GIVGVEGQELVHPK			1460.78	487.933	1460.8	487.94	3
2	Adam7	94.27	KLPLLHK		missed K-L@1	847.53	424.772	847.564	424.789	2
2	Adam7	78.43	KSALIDVENIEEHNAEDHHK		missed K-S@1	2326.99	776.67	2327.11	776.712	3
2	Adam7	99	KSALIDVENIEEHNAEDHHKEK		missed K-S@1	2584.13	647.039	2584.25	647.07	4
2	Adam7	98.67	KSALIDVENIEEHNAEDHHKEK	Deamidated(N)@14	missed K-S@1	2584.16	647.047	2585.24	647.316	4
2	Adam7	85.13	KSALIDVENIEEHNAEDHHKEK	Deamidated(N)@14	missed K-S@1	2584.13	862.385	2585.24	862.753	3
2	Adam7	99	KTLILHLLK		missed K-T@1	1077.66	539.835	1077.73	539.871	2
2	Adam7	93.65	SALIDVENIEEHNAEDHHK	Deamidated(N)@13		2198.88	733.967	2200	734.342	3
2	Adam7	91.73	SALIDVENIEEHNAEDHHK	Deamidated(N)@13		2199	550.757	2200	551.008	4
2	Adam7	52.67	SALIDVENIEEHNAEDHHK	Deamidated(N)@8		2198.85	550.719	2200	551.008	4
2	Adam7	86.16	SALIDVENIEEHNAEDHHKEK	Deamidated(N)@13		2456.06	819.693	2457.14	820.054	3
2	Adam7	99	TLILHLLK			949.549	475.782	949.632	475.823	2
2	Adam7	84.98	YLIEPVK			860.472	431.243	860.501	431.258	2
2	Adam7	99	YSDDGEHLVYK			1324.51	663.264	1324.59	663.304	2
3	Adam8	99	CEEGKVCMDGSCQDLR	Propionamide(C)@1; Propionamide(C)@7; Propionamide(C)@12	missed K-V@5	1984.85	662.622	1984.81	662.611	3
3	Adam8	98.51	CGALYCEGGQKPLER	Propionamide(C)@1; Propionamide(C)@6		1764.9	589.309	1764.83	589.284	3
3	Adam8	99	CNNHGVCNHK	Propionamide(C)@1; Propionamide(C)@7		1266.5	634.255	1266.53	634.275	2
3	Adam8	99	DKCDLEEFCDGR	Propionamide(C)@3; Propionamide(C)@9	missed K-C@2	1570.56	786.287	1570.64	786.327	2
3	Adam8	99	DKCDLEEFCDGR	Propionamide(C)@3; Propionamide(C)@9	missed K-C@2	1570.64	524.553	1570.64	524.554	3
3	Adam8	96.64	DKFYISR		missed K-F@2	927.465	464.74	927.481	464.748	2
3	Adam8	99	DLWGPGAR			870.413	436.214	870.435	436.225	2
3	Adam8	99	DTNLNDLGPR			1113.51	557.763	1113.54	557.778	2
3	Adam8	99	EGGGCIMTESIGSK	Propionamide(C)@5		1438.58	720.297	1438.64	720.329	2
3	Adam8	99	EGGGCIMTESIGSK	Propionamide(C)@5; Oxidation(M)@7		1454.58	728.297	1454.64	728.326	2
3	Adam8	98.81	GAECASGTCCHECK	Propionamide(C)@4; Propionamide(C)@9; Propionamide(C)@10; Propionamide(C)@13		1680.77	561.265	1681.63	561.551	3
3	Adam8	97.73	GAECASGTCCHECK	Propionamide(C)@4; Propionamide(C)@9; Propionamide(C)@10; Propionamide(C)@13		1681.55	841.782	1681.63	841.823	2
3	Adam8	99	GWAPPNCVQR	Propionamide(C)@7		1197.53	599.771	1197.57	599.793	2
3	Adam8	99	HSGAVNQDHSK			1178.5	590.256	1178.54	590.279	2
3	Adam8	64.38	IDLESFVTKPQTGCLTNVPDVNR	Propionamide(C)@14; Deamidated(N)@17		2616.18	873.067	2617.31	873.443	3
3	Adam8	62.82	IDLESFVTKPQTGCLTNVPDVNR	Propionamide(C)@14		2616.2	873.072	2616.32	873.115	3
3	Adam8	94.05	IPNQFRPDPPTKPLPELKPK			2311.26	771.427	2311.31	771.442	3
3	Adam8	99	KPTCPEDAFQQNGTPCPGGYCFDGSCPTLAQQCR	Propionamide(C)@4; Deamidated(N)@12; Propionamide(C)@16; Propionamide(C)@21; Propionamide(C)@26; Propionamide(C)@33		3973.49	994.38	3974.68	994.677	4
3	Adam8	99	LYQELSFR			1054.48	528.245	1054.54	528.28	2
3	Adam8	98.17	NRPPDPSETVSTNQPPRPIVKPK	Deamidated(N)@13		2553.53	639.389	2554.35	639.595	4
3	Adam8	97.75	QVKPTFAPPTPPVKPGTGGTVPGATQGAGGPK	Gln->pyro-Glu@N-term		2979.43	994.15	2979.58	994.201	3
3	Adam8	99	QYEVVWPR	Gln->pyro-Glu@N-term		1058.49	530.253	1058.52	530.267	2
3	Adam8	97.83	QYEVVWPR			1075.52	538.769	1075.55	538.78	2
3	Adam8	99	RPPPAPPGAVSSSPLPVPVYAPK			2280.13	761.049	2280.26	761.095	3
3	Adam8	99	SVAPKPISGLSNPLFYTR			1946.04	649.686	1946.06	649.695	3
3	Adam8	96.37	SVAPKPISGLSNPLFYTR			1945.93	973.973	1946.06	974.039	2
3	Adam8	99	VALKVPIQK		missed K-V@4	994.637	498.326	994.654	498.334	2
3	Adam8	99	VCMDGSCQDLR	Propionamide(C)@2; Propionamide(C)@7		1367.51	684.763	1367.56	684.789	2
3	Adam8	99	VCMDGSCQDLR	Propionamide(C)@2; Oxidation(M)@3; Propionamide(C)@7		1383.49	692.754	1383.56	692.786	2
3	Adam8	99	VGSTVHLIEPLDADEEGQHAMYQAK			2737.21	685.309	2737.3	685.333	4
3	Adam8	98.89	VGSTVHLIEPLDADEEGQHAMYQAK			2737.16	913.394	2737.3	913.441	3
3	Adam8	61.29	VGSTVHLIEPLDADEEGQHAMYQAK	Oxidation(M)@21		2753.16	918.729	2753.3	918.773	3
3	Adam8	99	VLEVVNHVDK			1150.6	576.307	1150.63	576.325	2
4	Adam9	99	ALSPLASLR			926.518	464.266	926.555	464.285	2
4	Adam9	99	CATGNALCGK	Propionamide(C)@1; Propionamide(C)@8		1078.48	540.246	1078.49	540.252	2
4	Adam9	99	CHGHGVCNSNK	Propionamide(C)@1; Propionamide(C)@7		1296.52	649.27	1296.55	649.28	2
4	Adam9	99	CHGHGVCNSNK	Propionamide(C)@1; Propionamide(C)@7		1296.55	433.19	1296.55	433.189	3
4	Adam9	99	DCFIEVNSK	Propionamide(C)@2		1124.48	563.247	1124.52	563.266	2
4	Adam9	86.14	DCQFLPGGSMCR	Propionamide(C)@2; Oxidation(M)@10; Propionamide(C)@11		1470.62	736.319	1470.61	736.31	2
4	Adam9	81.49	EALGPSSQQISYVIQAQGK			2003.01	668.676	2003.03	668.685	3
4	Adam9	99	ECEVDPCCEGSTCK	Propionamide(C)@2; Propionamide(C)@7; Propionamide(C)@8; Propionamide(C)@13		1785.64	596.221	1785.67	596.23	3
4	Adam9	99	ECEVDPCCEGSTCK	Propionamide(C)@2; Propionamide(C)@7; Propionamide(C)@8; Propionamide(C)@13		1785.68	893.849	1785.67	893.841	2
4	Adam9	91.61	ECFCGAK	Propionamide(C)@2; Propionamide(C)@4		898.349	450.182	898.368	450.191	2
4	Adam9	81.15	EKFLITR		missed K-F@2	905.53	453.772	905.533	453.774	2
4	Adam9	99	FGNCGFSGSEYKK	Propionamide(C)@4	missed K-K@12	1493.67	747.844	1493.66	747.838	2
4	Adam9	99	FGNCGFSGSEYKK	Propionamide(C)@4	missed K-K@12	1493.69	498.902	1493.66	498.894	3
4	Adam9	94.83	FPVPTYAAK			992.534	497.274	992.533	497.274	2
4	Adam9	93.67	GGSCLLNIPKPDEAYSAPSCGNK	Propionamide(C)@4; Propionamide(C)@20		2462.19	821.736	2462.16	821.726	3
4	Adam9	99	GYGGSVDSGPTYNAK			1471.68	736.846	1471.66	736.836	2
4	Adam9	99	GYGGSVDSGPTYNAK			1471.67	491.565	1471.66	491.56	3
4	Adam9	99	HDSAQLVLK			1009.55	505.782	1009.56	505.785	2
4	Adam9	99	HDSAQLVLKK		missed K-K@9	1137.63	569.824	1137.65	569.833	2
4	Adam9	99	LVDPGEECDCGTAK	Propionamide(C)@8; Propionamide(C)@10		1577.67	789.843	1577.67	789.842	2
4	Adam9	99	LVDPGEECDCGTAK	Propionamide(C)@8; Propionamide(C)@10		1577.68	526.9	1577.67	526.897	3
4	Adam9	94.81	NFQCVNASVLNYDCDIQGK	Propionamide(C)@4; Deamidated(N)@11; Propionamide(C)@14		2272.02	758.348	2273.01	758.677	3
4	Adam9	99	NFSSCSAEDFEK	Propionamide(C)@5		1433.58	717.796	1433.58	717.796	2
4	Adam9	98.41	NTDLLPNDFVVYTYDK			1915.91	958.961	1915.92	958.967	2
4	Adam9	99	QHIIHLER	Gln->pyro-Glu@N-term		1027.56	514.789	1027.56	514.785	2
4	Adam9	80.91	QPAQFPSRPPPPQPK			1670.88	557.968	1670.89	557.97	3
4	Adam9	99	REALGPSSQQISYVIQAQGK		missed R-E@1	2159.17	720.732	2159.13	720.718	3
4	Adam9	99	SCIMNSGASGSR	Propionamide(C)@2		1239.53	620.774	1239.53	620.774	2
4	Adam9	99	SCIMNSGASGSR	Propionamide(C)@2; Oxidation(M)@4		1255.52	628.768	1255.53	628.772	2
4	Adam9	99	SFAECAYGDCCK	Propionamide(C)@5; Propionamide(C)@10; Propionamide(C)@11		1508.57	755.293	1508.57	755.294	2
4	Adam9	99	YVELFIVVDKER			1508.92	755.47	1508.82	755.419	2
5	Adam15	99	AGPDLLLEQHHAHR			1592.54	797.276	1592.82	797.416	2
5	Adam15	96.81	AGPDLLLEQHHAHR			1592.72	531.913	1592.82	531.946	3
5	Adam15	99	ALLEGMGSCLFER	Propionamide(C)@9		1495.43	748.72	1495.72	748.865	2
5	Adam15	99	ALLEGMGSCLFER	Oxidation(M)@6; Propionamide(C)@9		1511.41	756.713	1511.71	756.863	2
5	Adam15	70.57	APQSCPPERPGPPQR	Propionamide(C)@5		1686.69	563.237	1686.83	563.283	3
5	Adam15	99	CEEGWAPPDCMTQLK	Propionamide(C)@1; Propionamide(C)@10		1848.34	925.176	1848.78	925.4	2
5	Adam15	99	CHGHGVCDSSGHCR	Propionamide(C)@1; Propionamide(C)@7; Propionamide(C)@13		1666.53	556.516	1666.65	556.558	3
5	Adam15	99	CQPVDLLGAQECR	Propionamide(C)@1; Propionamide(C)@12		1572.4	787.21	1572.74	787.377	2
5	Adam15	99	CQPVDLLGAQECR	Propionamide(C)@1; Propionamide(C)@12		1572.72	525.247	1572.74	525.254	3
5	Adam15	99	DVMCGQLQCQWGR	Oxidation(M)@3; Propionamide(C)@4; Propionamide(C)@9		1680.35	841.185	1680.72	841.366	2
5	Adam15	99	DVMCGQLQCQWGR	Propionamide(C)@4; Propionamide(C)@9		1664.34	833.179	1664.72	833.368	2
5	Adam15	99	GLIVLSPER			982.509	492.262	982.581	492.298	2
5	Adam15	94.18	GNAFGSCGR	Propionamide(C)@7		938.369	470.192	938.403	470.209	2
5	Adam15	99	IVELVIVADNSEVR			1554.53	778.271	1554.86	778.438	2
5	Adam15	99	KCHGHGVCDSSGHCR	Propionamide(C)@2; Propionamide(C)@8; Propionamide(C)@14	missed K-C@1	1794.61	599.211	1794.75	599.256	3
5	Adam15	99	KLQAALADR		missed K-L@1	984.512	493.264	984.572	493.293	2
5	Adam15	99	LGDGEPCASGEAVCMHGR	Propionamide(C)@7; Propionamide(C)@14		1929.59	644.204	1929.81	644.278	3
5	Adam15	99	LGDGEPCASGEAVCMHGR	Propionamide(C)@7; Propionamide(C)@14; Oxidation(M)@15		1945.57	649.529	1945.81	649.61	3
5	Adam15	99	LQAALADR			856.475	429.245	856.477	429.246	2
5	Adam15	99	MVSEGYSLENCCYR	Oxidation(M)@1; Propionamide(C)@11; Propionamide(C)@12		1810.31	906.161	1810.73	906.373	2
5	Adam15	99	MVSEGYSLENCCYR	Propionamide(C)@11; Propionamide(C)@12		1794.47	599.166	1794.74	599.253	3
5	Adam15	99	MVSEGYSLENCCYR	Propionamide(C)@11; Propionamide(C)@12		1794.31	898.163	1794.74	898.376	2
5	Adam15	91.52	MVSEGYSLENCCYR	Oxidation(M)@1; Propionamide(C)@11; Propionamide(C)@12		1810.5	604.507	1810.73	604.585	3
5	Adam15	93.7	QASVVSFPVPPSRPLPPNPVPK			2308.85	770.623	2309.29	770.77	3
5	Adam15	99	QCQSLWGPGAQPAAPLCLQTANTR	Gln->pyro-Glu@N-term; Propionamide(C)@2; Propionamide(C)@17		2634.81	879.279	2635.26	879.428	3
5	Adam15	97.83	QCQSLWGPGAQPAAPLCLQTANTR	Propionamide(C)@2; Propionamide(C)@17		2651.67	884.897	2652.29	885.104	3
5	Adam15	97.22	SCIMEASTDFLPGLNFSNCSR	Propionamide(C)@2; Oxidation(M)@4; Propionamide(C)@19		2448.47	817.165	2449.07	817.364	3
5	Adam15	99	SPGGSYMPCAPR	Propionamide(C)@9		1292.37	647.192	1292.56	647.289	2
5	Adam15	99	SPGGSYMPCAPR	Oxidation(M)@7; Propionamide(C)@9		1308.37	655.192	1308.56	655.287	2
5	Adam15	99	SQGPTKPPPPR			1160.49	581.251	1160.63	581.322	2
5	Adam15	98.97	SQPLLGSVQDR			1198.48	600.245	1198.63	600.323	2
5	Adam15	95.28	TLSGSMESR	Oxidation(M)@6		982.378	492.196	982.439	492.227	2
5	Adam15	87.15	TLSGSMESR			966.409	484.212	966.444	484.229	2
5	Adam15	63.48	VVQDSPPMSLADVLQTGLPEALR	Oxidation(M)@8		2450.7	817.907	2451.27	818.097	3
5	Adam15	98.98	YPDFQQLLNR			1292.44	647.23	1292.65	647.333	2
6	Adam18	99	CQALNDQCVSLFGK	Propionamide(C)@1; Propionamide(C)@8		1666.74	834.38	1666.78	834.398	2
6	Adam18	99	CQALNDQCVSLFGK	Propionamide(C)@1; Deamidated(N)@5; Propionamide(C)@8		1666.71	556.579	1667.76	556.929	3
6	Adam18	99	CQALNDQCVSLFGK	Propionamide(C)@1; Deamidated(N)@5; Propionamide(C)@8		1667.71	834.863	1667.76	834.89	2
6	Adam18	99	ECCDHETCR	Propionamide(C)@2; Propionamide(C)@3; Propionamide(C)@8		1307.47	654.742	1307.47	654.742	2
6	Adam18	99	ENLANCDSK	Propionamide(C)@6		1063.46	532.739	1063.46	532.737	2
6	Adam18	99	EVNFTGNDCNATK	Propionamide(C)@9		1482.64	742.326	1482.64	742.328	2
6	Adam18	99	EVNFTGNDCNATKK	Propionamide(C)@9	missed K-K@13	1610.75	806.384	1610.74	806.375	2
6	Adam18	99	FEHIVYQVK			1161.62	581.818	1161.62	581.816	2
6	Adam18	99	GHFNEQDK			973.42	487.717	973.425	487.72	2
6	Adam18	81.79	GHFNEQDK	Deamidated(N)@4		974.432	488.223	974.409	488.212	2
6	Adam18	99	GHFNEQDKNHSQLLPQSLK		missed K-N@8	2219.17	740.73	2219.11	740.71	3
6	Adam18	72.88	GHFNEQDKNHSQLLPQSLK		missed K-N@8	2219.15	555.794	2219.11	555.784	4
6	Adam18	99	GSQGASYACFEK	Propionamide(C)@9		1317.55	659.782	1317.57	659.79	2
6	Adam18	98.5	LACFRPPK	Propionamide(C)@3		1001.56	501.789	1001.55	501.781	2
6	Adam18	99	LGSAYCYNGR	Propionamide(C)@6		1173.51	587.763	1173.52	587.769	2
6	Adam18	96.43	NCSCPSAPCIMQQGALSSSGK	Propionamide(C)@2; Propionamide(C)@4; Propionamide(C)@9		2280.99	761.339	2281	761.339	3
6	Adam18	92.87	NHISTDGNATDILQR			1653.82	827.919	1653.81	827.911	2
6	Adam18	96.35	TESAFATK			853.398	427.706	853.418	427.716	2
6	Adam18	99	YIGAASPGEICSK	Propionamide(C)@11		1365.64	683.827	1365.66	683.837	2
7	Adam21	99	ALPSLIDLSQTGSTQYLSSPEVVIPLK			2855.52	952.849	2855.55	952.858	3
7	Adam21	99	DGTTCGVGK	Propionamide(C)@5		907.401	454.708	907.407	454.711	2
7	Adam21	99	FGHCGTDGTVFLK	Propionamide(C)@4		1451.68	726.846	1451.69	726.851	2
7	Adam21	99	FGHCGTDGTVFLK	Propionamide(C)@4		1451.53	484.849	1451.69	484.903	3
7	Adam21	99	FMLLGELCRPK	Propionamide(C)@8		1376.73	689.372	1376.73	689.373	2
7	Adam21	99	FMLLGELCRPK	Oxidation(M)@2; Propionamide(C)@8		1392.81	465.277	1392.73	465.249	3
7	Adam21	92.97	FMLLGELCRPK	Propionamide(C)@8		1376.81	459.942	1376.73	459.918	3
7	Adam21	99	FTNCSYSDFMK	Propionamide(C)@4; Oxidation(M)@10		1428.57	715.29	1428.57	715.292	2
7	Adam21	99	FTNCSYSDFMK	Propionamide(C)@4		1412.53	707.274	1412.57	707.294	2
7	Adam21	99	GYGGSIDSGPTSQK			1352.61	677.31	1352.62	677.318	2
7	Adam21	92.08	GYGGSIDSGPTSQKR		missed K-R@14	1508.74	755.378	1508.72	755.368	2
7	Adam21	99	HDEESCSCGK	Propionamide(C)@6; Propionamide(C)@8		1235.45	618.732	1235.45	618.735	2
7	Adam21	99	HSSTFEHLVYTLNNNK			1902.92	952.467	1902.92	952.469	2
7	Adam21	99	HSSTFEHLVYTLNNNK	Deamidated(N)@15		1903.87	635.632	1903.91	635.643	3
7	Adam21	89.77	HSSTFEHLVYTLNNNK			1902.98	635.333	1902.92	635.315	3
7	Adam21	88.7	HSSTFEHLVYTLNNNK	Deamidated(N)@13		1903.95	635.658	1903.91	635.643	3
7	Adam21	99	KCVSLSVLSNACLPETCNR	Propionamide(C)@2; Propionamide(C)@12; Propionamide(C)@17	missed K-C@1	2249.11	750.709	2249.1	750.706	3
7	Adam21	99	LLYQPFGVEEAKK		missed K-K@12	1520.83	507.95	1520.82	507.949	3
7	Adam21	94.53	LLYQPFGVEEAKK		missed K-K@12	1520.83	761.421	1520.82	761.419	2
7	Adam21	99	MECFIMLGADAR	Propionamide(C)@3; Oxidation(M)@6		1442.63	722.321	1442.64	722.325	2
7	Adam21	99	MECFIMLGADAR	Oxidation(M)@1; Propionamide(C)@3; Oxidation(M)@6		1458.64	730.328	1458.63	730.323	2
7	Adam21	99	MSDVFCGK	Oxidation(M)@1; Propionamide(C)@6		972.409	487.212	972.404	487.21	2
7	Adam21	99	MSDVFCGK	Propionamide(C)@6		956.379	479.197	956.41	479.212	2
7	Adam21	99	NSEWLSYSLVFGGR			1613.78	807.899	1613.78	807.899	2
7	Adam21	99	QISLSQVHHDAAHIFIR	Gln->pyro-Glu@N-term		1954.01	978.011	1954.02	978.016	2
7	Adam21	99	RLLYQPFGVEEAKK		missed R-L@1; missed K-K@13	1676.94	559.986	1676.93	559.982	3
7	Adam21	69.93	TQFPPMLCSLTEK	Propionamide(C)@8		1564.76	783.387	1564.76	783.389	2
7	Adam21	99	VTLLLLWLK			1097.69	549.852	1097.72	549.868	2
8	Lepr	99	AEITVNTGLLK			1157.65	579.832	1157.67	579.84	2
8	Lepr	83.46	DSFQTVQCNCSLR	Propionamide(C)@8; Propionamide(C)@10		1641.74	821.875	1641.72	821.869	2
8	Lepr	99	FNSSGIYVPELSK			1439.7	720.858	1439.73	720.872	2
8	Lepr	99	FYIHDNFIPIEK			1534.84	768.428	1534.78	768.398	2
8	Lepr	99	FYIHDNFIPIEK			1534.73	512.586	1534.78	512.601	3
8	Lepr	59.22	GASEAIVEAK			973.545	487.78	973.508	487.761	2
8	Lepr	99	GCECHVPVPR	Propionamide(C)@2; Propionamide(C)@4		1237.58	619.795	1237.57	619.792	2
8	Lepr	99	ILNEDDGMK			1033.46	517.739	1033.47	517.745	2
8	Lepr	89.92	ILNEDDGMK	Oxidation(M)@8		1049.45	525.734	1049.47	525.742	2
8	Lepr	58.35	ILTSVGSNASFHCIYK	Propionamide(C)@13		1809.99	604.336	1809.91	604.31	3
8	Lepr	99	IPEIQYSIVSDR			1418.72	710.367	1418.74	710.378	2
8	Lepr	51.03	KLFWDDVPNPK		missed K-L@1	1357.72	679.866	1357.7	679.859	2
8	Lepr	99	LFCGPPNTTDDSFLSPAGAPNNASALK	Propionamide(C)@3		2775.33	926.116	2775.32	926.113	3
8	Lepr	98.74	LFWDDVPNPK			1229.6	615.806	1229.61	615.811	2
8	Lepr	99	NCSWAQGLNFQK	Propionamide(C)@2		1465.66	733.837	1465.68	733.846	2
8	Lepr	66.16	NDSLCSVR	Propionamide(C)@5		963.489	482.752	963.444	482.729	2
8	Lepr	99	NENQIISSK			1031.5	516.758	1031.52	516.77	2
8	Lepr	99	NENQIISSK	Deamidated(N)@3		1032.53	517.274	1032.51	517.262	2
8	Lepr	80.4	NLAEKIPEIQYSIVSDR		missed K-I@5	1974.15	659.056	1974.04	659.021	3
8	Lepr	99	SLYCPDSPSIHPTSEPK	Propionamide(C)@4		1927.91	643.645	1927.9	643.64	3
8	Lepr	99	TAHNGTWSEDVGNR			1542.72	515.247	1542.68	515.234	3
8	Lepr	86.85	TAHNGTWSEDVGNR			1542.68	772.347	1542.68	772.348	2
8	Lepr	99	THEVFDAK			945.445	473.73	945.456	473.735	2
8	Lepr	70.02	TVFHCCFGNEQGQNCSALTDNTEGK	Propionamide(C)@5; Propionamide(C)@6; Propionamide(C)@15		2915.27	972.765	2915.23	972.75	3
8	Lepr	87.83	VHLLYDLPEVIDDSPLPPLK			2272.29	758.439	2272.24	758.419	3
8	Lepr	54.28	VTFSNLK			807.464	404.74	807.449	404.732	2
8	Lepr	99	YLENSTIVR			1093.57	547.794	1093.58	547.796	2
8	Lepr	59.49	YQFSLYPVFMEGVGKPK			1989	664.007	1989.01	664.01	3
9	Msr1	99	ADLIDTGR			859.391	430.703	859.44	430.727	2
9	Msr1	99	DWEHSQTLK			1142.54	572.275	1142.54	572.275	2
9	Msr1	99	EDADCSSESVK	Propionamide(C)@5		1239.41	620.71	1239.49	620.754	2
9	Msr1	99	EEQAHVEQEVK			1324.56	663.286	1324.63	663.32	2
9	Msr1	53.92	ENTSNVEMR	Oxidation(M)@8		1094.39	548.201	1094.47	548.24	2
9	Msr1	99	FQNFSMATDQR	Oxidation(M)@6		1359.51	680.76	1359.59	680.801	2
9	Msr1	99	FQNFSMATDQR			1343.51	672.764	1343.59	672.804	2
9	Msr1	91.62	FQNFSMATDQR	Deamidated(N)@3; Oxidation(M)@6		1360.51	681.263	1360.57	681.293	2
9	Msr1	99	FTIIMAHMK	Oxidation(M)@5; Oxidation(M)@8		1122.48	562.248	1122.56	562.286	2
9	Msr1	99	FTIIMAHMK	Oxidation(M)@8		1106.53	554.273	1106.56	554.288	2
9	Msr1	99	FTIIMAHMK	Oxidation(M)@5		1106.49	554.253	1106.56	554.288	2
9	Msr1	83	FTIIMAHMKDMEER	Oxidation(M)@5; Oxidation(M)@8; Oxidation(M)@11		1798.71	900.361	1798.81	900.41	2
9	Msr1	95.73	GDRGQIGFPGGR		missed R-G@3	1215.56	608.79	1215.61	608.813	2
9	Msr1	91.52	GDRGQIGFPGGR		missed R-G@3	1215.6	406.206	1215.61	406.211	3
9	Msr1	99	GIPGVKGDR		missed K-G@6	897.442	449.728	897.503	449.759	2
9	Msr1	99	GLTGQTGPPGAPGIR			1377.66	689.837	1377.74	689.875	2
9	Msr1	99	GLTGQTGPPGAPGIR			1377.57	460.197	1377.74	460.253	3
9	Msr1	99	GNPGAPGKPGR			1006.46	504.236	1006.53	504.273	2
9	Msr1	99	GQIGFPGGR			887.368	444.691	887.461	444.738	2
9	Msr1	89.18	IQSISNSK			875.422	438.718	875.471	438.743	2
9	Msr1	98.45	IQSISNSKADLIDTGR	Deamidated(N)@6	missed K-A@8	1716.79	573.272	1717.88	573.635	3
9	Msr1	58.71	LCPHER	Propionamide(C)@2		824.347	413.181	824.396	413.205	2
9	Msr1	72.07	LCPHEREDADCSSESVK	Propionamide(C)@2; Propionamide(C)@11	missed R-E@6	2045.81	682.943	2045.88	682.967	3
9	Msr1	99	LKDWEHSQTLK			1383.67	692.841	1383.71	692.865	2
9	Msr1	99	LKDWEHSQTLK			1383.64	462.22	1383.71	462.245	3
9	Msr1	69.5	NCLVCSR	Propionamide(C)@2; Propionamide(C)@5		935.385	468.7	935.432	468.723	2
9	Msr1	98.45	NGPSVQEK			857.356	429.685	857.424	429.719	2
9	Msr1	99	NITFIQGPPGPQGEK			1581.73	791.874	1581.82	791.915	2
9	Msr1	99	NITFIQGPPGPQGEKGDR		missed K-G@15	1909.84	637.621	1909.96	637.662	3
9	Msr1	99	NITFIQGPPGPQGEKGDR		missed K-G@15	1909.86	955.938	1909.96	955.99	2
9	Msr1	99	NITFIQGPPGPQGEKGDR		missed K-G@15	1910.73	478.691	1909.96	478.498	4
9	Msr1	99	NTSDTSQGPMEK			1293.48	647.747	1293.55	647.783	2
9	Msr1	99	NTSDTSQGPMEK	Oxidation(M)@10		1309.45	655.732	1309.55	655.78	2
9	Msr1	99	NTSDTSQGPMEKENTSNVEMR	Oxidation(M)@10; Deamidated(N)@14		2370.94	791.321	2370.99	791.337	3
9	Msr1	99	NTSDTSQGPMEKENTSNVEMR	Deamidated(N)@14		2354.94	785.988	2355	786.006	3
9	Msr1	99	NTSDTSQGPMEKENTSNVEMR			2353.93	785.65	2354.01	785.678	3
9	Msr1	97.92	NTSDTSQGPMEKENTSNVEMR	Oxidation(M)@10		2369.92	790.982	2370.01	791.009	3
9	Msr1	86.63	NTSDTSQGPMEKENTSNVEMR	Deamidated(N)@1		2354.94	785.989	2355	786.006	3
9	Msr1	85.33	NTSDTSQGPMEKENTSNVEMR	Oxidation(M)@10; Deamidated(N)@14; Oxidation(M)@20		2386.94	796.652	2386.99	796.669	3
9	Msr1	99	QQEDISKLEER	Gln->pyro-Glu@N-term	missed K-L@7	1356.58	679.295	1356.65	679.333	2
9	Msr1	99	QQEDISKLEER		missed K-L@7	1373.65	687.835	1373.68	687.847	2
9	Msr1	99	SMTASLPHSTK			1158.49	580.252	1158.57	580.292	2
9	Msr1	99	SMTASLPHSTK	Oxidation(M)@2		1174.49	588.251	1174.57	588.29	2
9	Msr1	99	VLNNITNDLR			1170.55	586.284	1170.64	586.325	2
9	Msr1	99	VLNNITNDLR	Deamidated(N)@7		1171.52	586.768	1171.62	586.817	2
9	Msr1	61.25	VLNNITNDLR	Deamidated(N)@3		1171.56	586.785	1171.62	586.817	2
9	Msr1	99	VSAEVQSVK			945.438	473.726	945.513	473.764	2
9	Msr1	99	VSAEVQSVKEEQAHVEQEVK			2252.01	751.677	2252.13	751.717	3
9	Msr1	95.08	VSAEVQSVKEEQAHVEQEVK			2252.1	564.031	2252.13	564.039	4
10	Acvr1b	99	EAEIYQTVMLR			1351.67	676.842	1351.68	676.848	2
10	Acvr1b	99	EAEIYQTVMLR	Oxidation(M)@9		1367.66	684.835	1367.68	684.845	2
10	Acvr1b	98.37	ECWYANGAAR	Propionamide(C)@2		1210.52	606.266	1210.52	606.267	2
10	Acvr1b	99	HDAVTDTIDIAPNQR			1664.66	555.895	1664.81	555.945	3
10	Acvr1b	99	HDAVTDTIDIAPNQR			1664.74	833.379	1664.81	833.413	2
10	Acvr1b	99	HENILGFIAADNK			1440.75	721.38	1440.74	721.375	2
10	Acvr1b	99	HENILGFIAADNK			1440.98	481.335	1440.74	481.253	3
10	Acvr1b	99	HENILGFIAADNK	Deamidated(N)@12		1441.7	721.858	1441.72	721.867	2
10	Acvr1b	99	SKNILVK		missed K-N@2	800.51	401.262	800.512	401.263	2
10	Acvr1b	99	TIVLQEIIGK			1112.56	557.287	1112.68	557.348	2
10	Acvr1b	85.9	YMAPEVLDETINMK	Oxidation(M)@2; Oxidation(M)@13		1684.65	562.559	1684.77	562.597	3
11	Acvr2a	99	AQLLNEYVAVK			1246.67	624.34	1246.69	624.353	2
11	Acvr2a	99	DGHKPAISHR			1116.59	559.302	1116.58	559.297	2
11	Acvr2a	99	GLAYLHEDIPGLK			1424.76	713.388	1424.77	713.39	2
11	Acvr2a	94.87	GLAYLHEDIPGLK			1424.73	475.919	1424.77	475.929	3
11	Acvr2a	62.49	GSLSDFLK			865.429	433.722	865.455	433.735	2
11	Acvr2a	99	HENILQFIGAEK			1397.74	699.875	1397.73	699.872	2
11	Acvr2a	88.17	LSAGCVGER	Propionamide(C)@5		961.465	481.74	961.465	481.74	2
11	Acvr2a	99	SAGDTHGQVGTR			1184.56	593.288	1184.55	593.284	2
11	Acvr2a	99	TNQTGVEPCYGDK	Propionamide(C)@9		1481.66	741.84	1481.65	741.83	2
11	Acvr2a	99	YMAPEVLEGAINLQR	Oxidation(M)@2		1718.84	860.427	1718.87	860.44	2
11	Acvr2a	99	YMAPEVLEGAINLQR	Oxidation(M)@2		1718.8	573.939	1718.87	573.963	3
12	Acvrl1	96.47	DEQSWFR			966.348	484.182	966.42	484.217	2
12	Acvrl1	99	DLHSDLGESSLILK			1525.47	763.741	1525.8	763.907	2
12	Acvrl1	99	DLHSDLGESSLILK			1525.62	509.548	1525.8	509.607	3
12	Acvrl1	99	ECWYPNPSAR	Propionamide(C)@2		1292.36	647.188	1292.56	647.288	2
12	Acvrl1	89.28	ECWYPNPSAR	Propionamide(C)@2		1292.63	431.883	1292.56	431.861	3
12	Acvrl1	67.71	EQGRHPQVYR		missed R-H@4	1268.68	423.901	1268.64	423.886	3
12	Acvrl1	99	ETEIYNTVLLR			1349.5	675.755	1349.72	675.867	2
12	Acvrl1	99	GDLAKPSK			814.489	408.252	814.455	408.235	2
12	Acvrl1	72.79	GRYGEVWR		missed R-Y@2	1021.47	511.744	1021.51	511.762	2
12	Acvrl1	99	HDNILGFIASDMTSR			1675.42	838.716	1675.8	838.907	2
12	Acvrl1	99	HDNILGFIASDMTSR	Oxidation(M)@12		1691.42	846.716	1691.79	846.904	2
12	Acvrl1	99	HDNILGFIASDMTSR	Oxidation(M)@12		1691.6	564.875	1691.79	564.939	3
12	Acvrl1	99	HDNILGFIASDMTSR			1675.5	559.507	1675.8	559.607	3
12	Acvrl1	67.1	HPQVYR			798.447	400.231	798.414	400.214	2
12	Acvrl1	99	LAADPVLSGLAQMMR			1571.48	786.746	1571.82	786.915	2
12	Acvrl1	99	LAADPVLSGLAQMMR	Oxidation(M)@13; Oxidation(M)@14		1603.48	802.746	1603.81	802.91	2
12	Acvrl1	99	LAADPVLSGLAQMMR	Oxidation(M)@14		1587.47	794.74	1587.81	794.913	2
12	Acvrl1	99	LAADPVLSGLAQMMR	Oxidation(M)@14		1587.63	530.219	1587.81	530.278	3
12	Acvrl1	99	LAADPVLSGLAQMMR	Oxidation(M)@13; Oxidation(M)@14		1603.66	535.56	1603.81	535.609	3
12	Acvrl1	99	LAADPVLSGLAQMMR	Oxidation(M)@13		1587.49	794.753	1587.81	794.913	2
12	Acvrl1	99	LSHNPEKPK			1048.49	525.251	1048.57	525.291	2
12	Acvrl1	99	LVNCTCESPHCK	Propionamide(C)@4; Propionamide(C)@6; Propionamide(C)@11		1545.39	773.702	1545.67	773.844	2
12	Acvrl1	96.73	LVNCTCESPHCK	Propionamide(C)@4; Propionamide(C)@6; Propionamide(C)@11		1545.67	516.231	1545.67	516.232	3
12	Acvrl1	89.01	MTLGSFR	Oxidation(M)@1		826.402	414.208	826.401	414.208	2
12	Acvrl1	58.04	MTLGSFR			810.444	406.229	810.406	406.21	2
12	Acvrl1	99	QRDLHSDLGESSLILK	Gln->pyro-Glu@N-term	missed R-D@2	1792.73	598.583	1792.93	598.651	3
12	Acvrl1	99	QTLEPQLALR	Gln->pyro-Glu@N-term		1150.51	576.26	1150.63	576.325	2
12	Acvrl1	99	QTLEPQLALR			1167.51	584.761	1167.66	584.838	2
12	Acvrl1	99	QVALVECVGK	Gln->pyro-Glu@N-term; Propionamide(C)@7		1098.44	550.225	1098.57	550.294	2
12	Acvrl1	99	QVALVECVGK	Propionamide(C)@7		1115.48	558.746	1115.6	558.808	2
12	Acvrl1	99	RYMAPEVLDEHIR		missed R-Y@1	1627.66	543.56	1627.81	543.612	3
12	Acvrl1	99	TDCFESYK	Propionamide(C)@3		1062.33	532.17	1062.43	532.224	2
12	Acvrl1	99	VVCVDQQTPTIPNR	Propionamide(C)@3		1639.49	820.751	1639.84	820.925	2
12	Acvrl1	99	VVCVDQQTPTIPNR	Propionamide(C)@3		1639.71	547.577	1639.84	547.619	3
12	Acvrl1	99	YGEVWR			808.468	405.241	808.387	405.201	2
12	Acvrl1	99	YMAPEVLDEHIR			1471.43	736.721	1471.71	736.864	2
12	Acvrl1	99	YMAPEVLDEHIR	Oxidation(M)@2		1487.72	496.913	1487.71	496.91	3
12	Acvrl1	99	YMAPEVLDEHIR	Oxidation(M)@2		1487.43	744.72	1487.71	744.861	2
13	Bmpr1a	97.06	CATLDTR	Propionamide(C)@1		849.386	425.7	849.401	425.708	2
13	Bmpr1a	99	DLEQDEAFIPVGESLK			1788.88	895.448	1788.88	895.446	2
13	Bmpr1a	99	DLIDQSQSSGSGSGLPLLVQR			2156.1	719.706	2156.11	719.71	3
13	Bmpr1a	99	ETEIYQTVLMR			1381.66	691.838	1381.69	691.853	2
13	Bmpr1a	98.12	ETEIYQTVLMR	Oxidation(M)@10		1397.67	699.841	1397.69	699.85	2
13	Bmpr1a	81.45	EVVCVKR	Propionamide(C)@4	missed K-R@6	902.497	452.256	902.501	452.258	2
13	Bmpr1a	99	FNSDTNEVDIPLNTR	Deamidated(N)@6		1734.8	868.409	1734.81	868.41	2
13	Bmpr1a	99	FNSDTNEVDIPLNTR			1733.83	867.921	1733.82	867.918	2
13	Bmpr1a	77.11	FNSDTNEVDIPLNTR	Deamidated(N)@2		1734.79	579.27	1734.81	579.276	3
13	Bmpr1a	71.19	FNSDTNEVDIPLNTR			1733.76	578.929	1733.82	578.948	3
13	Bmpr1a	53.17	FNSDTNEVDIPLNTR	Deamidated(N)@2		1734.82	868.417	1734.81	868.41	2
13	Bmpr1a	81.18	KNGSCCIADLGLAVK	Propionamide(C)@5; Propionamide(C)@6	missed K-N@1	1632.77	545.265	1632.83	545.285	3
13	Bmpr1a	99	KPENGVTLAPEDTLPFLK			1968.07	657.031	1968.06	657.026	3
13	Bmpr1a	99	KPENGVTLAPEDTLPFLK			1968.06	985.036	1968.06	985.036	2
13	Bmpr1a	94.05	LRPIVSNR			953.578	477.796	953.577	477.796	2
13	Bmpr1a	99	MTQLYTYIR			1187.58	594.8	1187.6	594.808	2
13	Bmpr1a	99	MTQLYTYIR	Oxidation(M)@1		1203.6	602.808	1203.6	602.805	2
13	Bmpr1a	99	MVESQDVK			934.427	468.221	934.443	468.229	2
13	Bmpr1a	99	MVESQDVKI		missed K-I@8	1047.49	524.752	1047.53	524.771	2
13	Bmpr1a	99	NGSCCIADLGLAVK	Propionamide(C)@4; Propionamide(C)@5		1504.71	753.363	1504.74	753.376	2
13	Bmpr1a	99	NGSCCIADLGLAVK	Deamidated(N)@1; Propionamide(C)@4; Propionamide(C)@5		1505.72	753.868	1505.72	753.868	2
13	Bmpr1a	99	RYMAPEVLDESLNK		missed R-Y@1	1663.9	555.641	1663.82	555.615	3
13	Bmpr1a	97.28	RYMAPEVLDESLNK	Oxidation(M)@3	missed R-Y@1	1679.79	560.936	1679.82	560.947	3
13	Bmpr1a	99	SDLDQKKPENGVTLAPEDTLPFLK		missed K-K@6	2654.41	664.609	2654.38	664.602	4
13	Bmpr1a	93.02	TIECCR	Propionamide(C)@4; Propionamide(C)@5		865.362	433.688	865.379	433.697	2
13	Bmpr1a	99	VFFTTEEASWFR			1518.67	760.343	1518.71	760.364	2
13	Bmpr1a	96.01	WNSDECLR	Propionamide(C)@6		1092.46	547.236	1092.47	547.24	2
13	Bmpr1a	99	YEGSDFQCK	Propionamide(C)@8		1146.46	574.239	1146.47	574.24	2
13	Bmpr1a	76.79	YEGSDFQCKDSPK	Propionamide(C)@8		1573.71	525.576	1573.67	525.565	3
13	Bmpr1a	99	YGEVWMGK			968.421	485.218	968.443	485.229	2
13	Bmpr1a	99	YGEVWMGK	Oxidation(M)@6		984.436	493.225	984.438	493.226	2
13	Bmpr1a	99	YMAPEVLDESLNK			1507.7	754.858	1507.72	754.869	2
13	Bmpr1a	99	YMAPEVLDESLNK	Oxidation(M)@2		1523.72	762.866	1523.72	762.866	2
13	Bmpr1a	99	YMAPEVLDESLNK	Oxidation(M)@2		1523.72	508.914	1523.72	508.913	3
14	Bmpr1b	86.15	DLHPTLPPLK			1129.63	565.82	1129.65	565.832	2
14	Bmpr1b	99	DLHPTLPPLKDR			1400.8	467.942	1400.78	467.933	3
14	Bmpr1b	99	DLIEQSQSSGSGSGLPLLVQR			2171.14	543.792	2170.12	543.538	4
14	Bmpr1b	99	DLIEQSQSSGSGSGLPLLVQR			2170.1	724.373	2170.12	724.382	3
14	Bmpr1b	79.44	DTPIPHQR			962.518	482.266	962.493	482.254	2
14	Bmpr1b	99	ETEIYQTVLMR			1381.66	691.838	1381.69	691.853	2
14	Bmpr1b	98.12	ETEIYQTVLMR	Oxidation(M)@10		1397.67	699.841	1397.69	699.85	2
14	Bmpr1b	99	FISDTNEVDIPPNTR			1716.78	859.399	1716.83	859.423	2
14	Bmpr1b	91.8	FISDTNEVDIPPNTR			1716.78	573.267	1716.83	573.285	3
14	Bmpr1b	99	KEDGESTAPTPRPK			1511.76	756.889	1511.76	756.886	2
14	Bmpr1b	96.33	KEDGESTAPTPRPK			1511.75	504.923	1511.76	504.927	3
14	Bmpr1b	99	KNGTCCIADLGLAVK	Propionamide(C)@5; Propionamide(C)@6	missed K-N@1	1646.89	549.971	1646.85	549.957	3
14	Bmpr1b	98.17	KNGTCCIADLGLAVK	Deamidated(N)@2; Propionamide(C)@5; Propionamide(C)@6	missed K-N@1	1647.82	550.28	1647.83	550.285	3
14	Bmpr1b	99	LMTECWAQNPASR	Propionamide(C)@5		1576.68	789.346	1576.71	789.364	2
14	Bmpr1b	99	LMTECWAQNPASR	Oxidation(M)@2; Propionamide(C)@5		1592.68	797.349	1592.71	797.361	2
14	Bmpr1b	99	LMTECWAQNPASR	Propionamide(C)@5		1576.57	526.532	1576.71	526.578	3
14	Bmpr1b	98.77	LMTECWAQNPASR	Oxidation(M)@2; Propionamide(C)@5		1592.78	531.934	1592.71	531.91	3
14	Bmpr1b	57.54	LRPSFPNR			985.546	493.78	985.546	493.78	2
14	Bmpr1b	98.72	MSESQDIK	Oxidation(M)@1		952.396	477.205	952.417	477.216	2
14	Bmpr1b	98.68	MSESQDIK			936.416	469.215	936.422	469.218	2
14	Bmpr1b	99	MSESQDIKL		missed K-L@8	1049.48	525.749	1049.51	525.76	2
14	Bmpr1b	99	MSESQDIKL	Oxidation(M)@1	missed K-L@8	1065.5	533.758	1065.5	533.758	2
14	Bmpr1b	99	NGTCCIADLGLAVK	Propionamide(C)@4; Propionamide(C)@5		1518.71	760.365	1518.75	760.384	2
14	Bmpr1b	99	NGTCCIADLGLAVK	Deamidated(N)@1; Propionamide(C)@4; Propionamide(C)@5		1519.69	760.854	1519.74	760.876	2
14	Bmpr1b	60.77	RYMPPEVLDESLNR		missed R-Y@1	1716.88	573.302	1717.85	573.622	3
14	Bmpr1b	95.37	SIECCTER	Propionamide(C)@4; Propionamide(C)@5		1081.46	541.735	1081.45	541.734	2
14	Bmpr1b	99	SKNILVK		missed K-N@2	800.51	401.262	800.512	401.263	2
14	Bmpr1b	99	VFFTTEEASWFR			1518.67	760.343	1518.71	760.364	2
14	Bmpr1b	77.12	WSSDECLR	Propionamide(C)@6		1065.46	533.737	1065.45	533.735	2
14	Bmpr1b	99	YGEVWMGK			968.44	485.227	968.443	485.229	2
14	Bmpr1b	99	YGEVWMGK	Oxidation(M)@6		984.436	493.225	984.438	493.226	2
14	Bmpr1b	98.33	YMPPEVLDESLNR			1561.7	781.859	1561.74	781.88	2
14	Bmpr1b	96.56	YMPPEVLDESLNR			1561.71	521.578	1561.74	521.589	3
14	Bmpr1b	81.31	YMPPEVLDESLNR	Oxidation(M)@2		1577.71	789.864	1577.74	789.877	2
14	Bmpr1b	55.88	YMPPEVLDESLNR	Oxidation(M)@2		1577.73	526.918	1577.74	526.92	3
14	Bmpr1b	72.18	YSIGLEQDETYIPPGESLR			2165.96	722.993	2166.05	723.023	3
15	Epha1	98.88	CPQHSIAESEGSTICTCENGHYR	Propionamide(C)@1; Propionamide(C)@15; Propionamide(C)@17; Deamidated(N)@19		2734.16	684.547	2735.14	684.792	4
15	Epha1	99	GIAQDGGPCQPCGK	Propionamide(C)@9; Propionamide(C)@12		1471.65	736.834	1471.65	736.835	2
15	Epha1	99	ILCSIQGFKD	Propionamide(C)@3		1193.59	597.803	1193.61	597.813	2
15	Epha1	99	LLDDFDGTYETQGGK			1657.76	829.885	1657.75	829.881	2
15	Epha1	99	LPSLSGSDGIPYR			1360.69	681.35	1360.7	681.357	2
15	Epha1	96.53	LQPDTTYIVR			1204.63	603.322	1204.65	603.33	2
15	Epha1	94.63	SIEDGYR			838.385	420.2	838.382	420.198	2
15	Epha1	99	SVSEWLESIR			1204.57	603.291	1204.61	603.312	2
15	Epha1	99	TIANFDPR			932.49	467.252	932.472	467.243	2
15	Epha1	97.18	TLTPLGPGPFSPDHEFR			1866.93	623.317	1866.93	623.316	3
15	Epha1	99	VSDFGLTR			893.445	447.73	893.461	447.738	2
15	Epha1	99	VSGLDSSSPSSASLSINMGHAESLSGLSLK	Oxidation(M)@18		2933.43	978.818	2933.43	978.817	3
15	Epha1	80.69	VSGLDSSSPSSASLSINMGHAESLSGLSLK	Deamidated(N)@17; Oxidation(M)@18		2933.41	978.812	2934.41	979.145	3
15	Epha1	94.06	VTTVAADQSFTIR			1407.73	704.872	1407.74	704.875	2
15	Epha1	98.05	YILHFR			847.438	424.726	847.47	424.742	2
15	Epha1	96.7	YSVECLQCR	Propionamide(C)@5; Propionamide(C)@8		1241.57	621.793	1241.55	621.784	2
16	Epha2	99	ACSPGFFK	Propionamide(C)@2		926.424	464.219	926.432	464.223	2
16	Epha2	99	FADIVSILDK			1119.48	560.748	1119.62	560.816	2
16	Epha2	99	KKGDANSYNVR		missed K-K@1; missed K-G@2	1250.42	626.218	1250.64	626.326	2
16	Epha2	99	LPSTSGSEGVPFR			1332.37	667.19	1332.67	667.341	2
16	Epha2	99	NGVSGLVTSR			988.473	495.244	988.53	495.272	2
16	Epha2	64.73	NGVSGLVTSR	Deamidated(N)@1		989.503	495.759	989.514	495.764	2
16	Epha2	99	NILVNSNLVCK	Propionamide(C)@10		1286.5	644.256	1286.7	644.358	2
16	Epha2	85.92	QKVIGAGEFGEVYK	Gln->pyro-Glu@N-term	missed K-V@2	1506.36	754.187	1506.77	754.393	2
16	Epha2	99	SEQLKPLK			941.552	471.784	941.555	471.785	2
16	Epha2	96.09	TASVSINQTEPPK			1371.42	686.716	1370.7	686.359	2
16	Epha2	99	TLADFDPR			933.419	467.717	933.456	467.735	2
16	Epha2	99	VIGAGEFGEVYK			1267.39	634.701	1267.64	634.83	2
16	Epha2	99	VLEDDPEATYTTSGGK			1681.26	841.638	1681.77	841.891	2
16	Epha2	99	VLEDDPEATYTTSGGK			1681.5	561.509	1681.77	561.597	3
16	Epha2	95.29	VLEDDPEATYTTSGGKIPIR		missed K-I@16	2160.53	721.184	2161.09	721.371	3
16	Epha2	99	VSDFGLSR			879.448	440.731	879.445	440.73	2
16	Epha2	96.75	VVQMSNEDIKR	Oxidation(M)@4	missed K-R@10	1333.36	667.687	1333.67	667.84	2
16	Epha2	93.31	VVQMSNEDIKR		missed K-R@10	1317.67	659.841	1317.67	659.843	2
16	Epha2	55.2	VVQMSNEDIKR	Oxidation(M)@4	missed K-R@10	1333.75	445.592	1333.67	445.563	3
16	Epha2	97.32	WTAPEAISYR			1192.4	597.21	1192.59	597.301	2
16	Epha2	98.75	YLANMNYVHR	Oxidation(M)@5		1295.36	648.685	1295.61	648.811	2
16	Epha2	96.96	YLANMNYVHR	Oxidation(M)@5		1295.68	432.9	1295.61	432.877	3
17	Epha3	98.07	ALETQSKNGPVPV	Deamidated(N)@8	missed K-N@7	1339.72	670.865	1339.7	670.856	2
17	Epha3	77.55	CENNYFR	Propionamide(C)@1		1015.43	508.723	1015.42	508.716	2
17	Epha3	99	CTCNAGYEER	Propionamide(C)@1; Propionamide(C)@3		1286.51	644.261	1286.5	644.258	2
17	Epha3	99	DITFNIICK	Propionamide(C)@8		1136.57	569.294	1136.59	569.302	2
17	Epha3	99	EIFTGVEYSSCDTIAK	Propionamide(C)@11		1832.83	917.421	1832.85	917.432	2
17	Epha3	60.32	ELDATNISIDK			1217.61	609.815	1217.61	609.814	2
17	Epha3	90.14	EVGPVNKK		missed K-K@7	869.493	435.754	869.497	435.756	2
17	Epha3	99	FEQIVSILDK			1190.61	596.312	1190.65	596.335	2
17	Epha3	99	FREHQFTK		missed R-E@2	1091.56	546.79	1091.55	546.783	2
17	Epha3	93.97	GTNVTISSLKPDTTYVFQIR			2239.16	747.394	2239.18	747.402	3
17	Epha3	99	HDAQFTVIQLVGMLR	Oxidation(M)@13		1742.89	872.453	1742.91	872.464	2
17	Epha3	99	IDTIAADESFTQMDLGDR			1996.88	999.448	1996.9	999.46	2
17	Epha3	99	IDTIAADESFTQMDLGDR	Oxidation(M)@13		2012.88	671.967	2012.9	671.974	3
17	Epha3	99	IDTIAADESFTQMDLGDR			1996.9	666.639	1996.9	666.642	3
17	Epha3	99	ISTDDMKK		missed K-K@7	936.462	469.238	936.459	469.237	2
17	Epha3	99	LHFGNGHLK	Deamidated(N)@5		1022.53	512.273	1022.53	512.272	2
17	Epha3	63.98	LKLPSKK		missed K-L@2; missed K-K@6	812.444	407.229	812.548	407.281	2
17	Epha3	99	MYCSTEGEWLVPIGK	Oxidation(M)@1; Propionamide(C)@3		1798.83	900.422	1798.83	900.421	2
17	Epha3	99	NILINSNLVCK	Propionamide(C)@10		1300.68	651.345	1300.72	651.366	2
17	Epha3	99	NLAMFPDTVPMDSQSLVEVR	Oxidation(M)@4		2264.1	755.707	2264.08	755.701	3
17	Epha3	99	NLAMFPDTVPMDSQSLVEVR	Oxidation(M)@11		2264.13	755.718	2264.08	755.701	3
17	Epha3	99	QCEPCSPNVR	Gln->pyro-Glu@N-term; Propionamide(C)@2; Propionamide(C)@5		1256.51	629.263	1256.53	629.271	2
17	Epha3	99	QEQETSYTILR	Gln->pyro-Glu@N-term		1349.62	675.818	1349.65	675.83	2
17	Epha3	99	TAAGYGTNSR			996.451	499.233	996.462	499.239	2
17	Epha3	76.91	TYVDPHTYEDPTQAVHEFAK			2347.04	783.355	2347.08	783.366	3
17	Epha3	99	VGVTVVGPQK			982.556	492.285	982.581	492.298	2
17	Epha3	99	VGVTVVGPQKK		missed K-K@10	1110.65	556.333	1110.68	556.345	2
17	Epha3	99	VLEDDPEAAYTTR			1478.69	740.354	1478.69	740.352	2
17	Epha3	99	VLEDDPEAAYTTR			1478.7	493.907	1478.69	493.904	3
17	Epha3	99	VSDFGLSR			879.448	440.731	879.445	440.73	2
17	Epha3	99	VVGAGEFGEVCSGR	Propionamide(C)@11		1436.66	719.339	1436.67	719.343	2
17	Epha3	99	YYEKQEQETSYTILR		missed K-Q@4	1949.93	650.984	1949.94	650.986	3
18	Epha4	99	AIEEGYR			836.401	419.208	836.403	419.209	2
18	Epha4	99	ALSTDASCAK	Propionamide(C)@8		1036.47	519.242	1036.49	519.25	2
18	Epha4	99	FGQIVNMLDK	Oxidation(M)@7		1179.59	590.801	1179.6	590.805	2
18	Epha4	96.82	FGQIVNMLDK	Deamidated(N)@6; Oxidation(M)@7		1180.57	591.292	1180.58	591.297	2
18	Epha4	99	GSCVNNSEEKDVPK	Propionamide(C)@3; Deamidated(N)@6		1577.77	526.929	1576.7	526.575	3
18	Epha4	77.24	HLNQGVR			822.442	412.228	822.446	412.23	2
18	Epha4	99	IGITAITHQNK			1194.67	598.342	1194.67	598.343	2
18	Epha4	99	ILSSVQAMR	Oxidation(M)@8		1019.56	510.789	1019.54	510.779	2
18	Epha4	99	NILVNSNLVCK	Propionamide(C)@10		1286.5	644.256	1286.7	644.358	2
18	Epha4	99	QDISYNVVCK	Gln->pyro-Glu@N-term; Propionamide(C)@9		1221.56	611.788	1221.57	611.792	2
18	Epha4	99	QEADEEKHLNQGVR	Gln->pyro-Glu@N-term	missed K-H@7	1634.81	545.945	1634.76	545.929	3
18	Epha4	99	TAAGYGDFSEPLEVTTNTVPSR			2311.12	771.379	2311.1	771.373	3
18	Epha4	99	TYVDPFTYEDPNQAVR			1913.87	957.944	1913.88	957.947	2
18	Epha4	99	VIGVGEFGEVCSGR	Propionamide(C)@11		1478.71	740.361	1478.72	740.367	2
18	Epha4	99	VLEDDPEAAYTTR			1478.69	740.354	1478.69	740.352	2
18	Epha4	99	VLEDDPEAAYTTR			1478.7	493.907	1478.69	493.904	3
18	Epha4	96.9	VSDFGMSR	Oxidation(M)@6		913.383	457.699	913.396	457.705	2
18	Epha4	99	WTAPEAIAYR			1176.58	589.297	1176.59	589.304	2
18	Epha4	99	YLSDMSYVHR	Oxidation(M)@5		1285.58	643.798	1285.58	643.795	2
18	Epha4	92.83	YLSDMSYVHR	Oxidation(M)@5		1285.6	429.539	1285.58	429.533	3
19	Epha7	99	AIEEGYR			836.401	419.208	836.403	419.209	2
19	Epha7	99	AVHQFAK			799.406	400.71	799.434	400.724	2
19	Epha7	99	AVTAAGYGNYSPR			1325.63	663.822	1325.64	663.826	2
19	Epha7	98.31	EVLLLDSK			915.486	458.75	915.528	458.771	2
19	Epha7	99	FEQIVGILDK			1160.62	581.317	1160.64	581.329	2
19	Epha7	99	IDTIAADESFTQGDLGER			1936.9	969.457	1936.9	969.458	2
19	Epha7	99	LDVATLEEASGK			1231.61	616.813	1231.63	616.822	2
19	Epha7	99	NILVNSNLVCK	Propionamide(C)@10		1286.5	644.256	1286.7	644.358	2
19	Epha7	99	TYIDPETYEDPNR			1611.7	806.859	1611.71	806.86	2
19	Epha7	99	VIEDDPEAVYTTTGGK			1693.79	565.604	1693.8	565.609	3
19	Epha7	99	VIEDDPEAVYTTTGGK			1693.82	847.919	1693.8	847.91	2
19	Epha7	99	VSDFGLSR			879.448	440.731	879.445	440.73	2
19	Epha7	99	YKDNFTAAGYNSLESVAR			2004.95	669.325	2004.95	669.325	3
20	Ephb4	99	APSGAVLDYEVK			1247.62	624.817	1247.64	624.827	2
20	Ephb4	99	DLVEPWVAIR			1196.62	599.315	1196.66	599.335	2
20	Ephb4	96.54	EDLTYAVR			965.455	483.735	965.482	483.748	2
20	Ephb4	99	FLEENSSDPTYTSSLGGK			1930.88	966.445	1930.88	966.447	2
20	Ephb4	99	FLEENSSDPTYTSSLGGK			1930.88	644.633	1930.88	644.634	3
20	Ephb4	99	FPQVVSALDK			1102.62	552.316	1102.6	552.308	2
20	Ephb4	99	IGFLSPAVPPAVSDIR			1637.91	819.961	1637.91	819.964	2
20	Ephb4	99	NILVNSNLVCK	Propionamide(C)@10		1286.5	644.256	1286.7	644.358	2
20	Ephb4	99	VSDFGLSR			879.448	440.731	879.445	440.73	2
20	Ephb4	99	VYIDPFTYEDPNEAVR			1926.83	643.285	1926.9	643.307	3
20	Ephb4	61.56	VYIDPFTYEDPNEAVR			1926.87	964.441	1926.9	964.457	2
20	Ephb4	91.63	WTAPEAIAFR			1160.59	581.304	1160.6	581.306	2
21	Ephb6	98.17	ALAGNVPCSPCPAR	Propionamide(C)@8; Propionamide(C)@11		1496.67	749.345	1496.72	749.369	2
21	Ephb6	99	ASSDPPEAPCTGPPSAPR	Propionamide(C)@10		1806.77	603.265	1806.82	603.281	3
21	Ephb6	99	ASSDPPEAPCTGPPSAPR	Propionamide(C)@10		1806.79	904.401	1806.82	904.418	2
21	Ephb6	99	CQPGHQPAR	Propionamide(C)@1		1063.44	532.726	1063.5	532.756	2
21	Ephb6	87.3	CRDEVHFDPR	Propionamide(C)@1	missed R-D@2	1343.48	448.834	1343.6	448.875	3
21	Ephb6	99	ECGGHGEPSSGGMCR	Propionamide(C)@2; Propionamide(C)@14		1604.54	535.854	1604.61	535.878	3
21	Ephb6	99	EGQFSSLQLVAMQR			1592.75	797.384	1592.8	797.406	2
21	Ephb6	99	EGQFSSLQLVAMQR	Oxidation(M)@12		1608.75	805.384	1608.79	805.404	2
21	Ephb6	98.88	EGQFSSLQLVAMQR			1592.68	531.902	1592.8	531.94	3
21	Ephb6	61.63	EGQFSSLQLVAMQR	Oxidation(M)@12		1608.71	537.244	1608.79	537.272	3
21	Ephb6	58.76	ETFTLYYR			1091.46	546.739	1091.53	546.772	2
21	Ephb6	98.61	EVDPTYIK			963.411	482.713	963.491	482.753	2
21	Ephb6	99	GDLLFNVVCK	Propionamide(C)@9		1177.56	589.785	1177.62	589.816	2
21	Ephb6	99	GTGYTEQLQQYSSPGLGVK			2011.93	671.65	2011.99	671.669	3
21	Ephb6	99	IEEVIGAGSFGEVR			1461.69	731.854	1461.75	731.88	2
21	Ephb6	99	LCQACPEGSYK	Propionamide(C)@2; Propionamide(C)@5		1339.54	670.777	1339.59	670.802	2
21	Ephb6	98.67	LFSYTCPSVLR	Propionamide(C)@6		1355.62	678.816	1355.69	678.853	2
21	Ephb6	99	LGHSPQGSSSLLR			1337.64	446.887	1337.71	446.909	3
21	Ephb6	97.91	LGHSPQGSSSLLR			1337.65	669.834	1337.71	669.86	2
21	Ephb6	92.93	LHCNGEGR	Propionamide(C)@3		955.356	478.685	955.429	478.722	2
21	Ephb6	99	LPQELGGR			868.419	435.217	868.477	435.246	2
21	Ephb6	73.17	LSPGHIYGFQVR			1372.67	687.34	1372.73	687.37	2
21	Ephb6	53.66	LSPGHIYGFQVR			1372.63	458.55	1372.73	458.582	3
21	Ephb6	99	MATEGTTGSGSR			1153.45	577.731	1153.5	577.759	2
21	Ephb6	99	QADEPDGPDSIAAWHLK	Gln->pyro-Glu@N-term		1831.8	916.909	1831.84	916.926	2
21	Ephb6	96.26	QADEPDGPDSIAAWHLK			1848.81	617.277	1848.86	617.295	3
21	Ephb6	72.23	QADEPDGPDSIAAWHLK			1848.86	925.439	1848.86	925.439	2
21	Ephb6	97.34	RGTGYTEQLQQYSSPGLGVK		missed R-G@1	2168.01	723.678	2168.09	723.703	3
21	Ephb6	99	SFGPLTQR			904.456	453.235	904.477	453.246	2
21	Ephb6	99	SHSPDPAAPVCPCLQGFYR	Propionamide(C)@11; Propionamide(C)@13		2185.96	729.66	2186	729.675	3
21	Ephb6	99	SVLVNSHLVCK	Propionamide(C)@10		1268.66	635.335	1268.69	635.353	2
21	Ephb6	97.87	VDTIAADESFPASSSSSSWAVGPHR			2560.15	854.39	2560.18	854.402	3
21	Ephb6	99	VGLQLNVK			869.443	435.729	869.533	435.774	2
21	Ephb6	99	YYIDPSTYDDPCQAIR	Propionamide(C)@12		1989.84	995.928	1989.88	995.946	2
21	Ephb6	99	YYIDPSTYDDPCQAIR	Propionamide(C)@12		1989.82	664.282	1989.88	664.3	3
22	Erbb2	86.24	ACPPCAPTCK	Propionamide(C)@2; Propionamide(C)@5; Propionamide(C)@9		1202.52	602.267	1202.52	602.27	2
22	Erbb2	99	DPLDNVTTAAPGR			1325.65	663.834	1325.66	663.836	2
22	Erbb2	99	GRLPTDCCHEQCAAGCTGPK	Propionamide(C)@7; Propionamide(C)@8; Propionamide(C)@12; Propionamide(C)@16	missed R-L@2	2329.98	583.501	2330	583.508	4
22	Erbb2	99	GRLPTDCCHEQCAAGCTGPK	Propionamide(C)@7; Propionamide(C)@8; Propionamide(C)@12; Propionamide(C)@16	missed R-L@2	2330.05	777.69	2330	777.675	3
22	Erbb2	99	KNNQLAPVDMDTNR	Oxidation(M)@10	missed K-N@1	1630.78	544.602	1630.77	544.598	3
22	Erbb2	98.72	KNNQLAPVDMDTNR	Oxidation(M)@10	missed K-N@1	1630.77	816.393	1630.77	816.394	2
22	Erbb2	99	LPASPETHLDMLR			1478.74	740.378	1478.76	740.385	2
22	Erbb2	99	LPASPETHLDMLR	Oxidation(M)@11		1494.76	748.387	1494.75	748.382	2
22	Erbb2	76.93	LPASPETHLDMLR			1478.77	493.931	1478.76	493.926	3
22	Erbb2	99	LPTDCCHEQCAAGCTGPK	Propionamide(C)@5; Propionamide(C)@6; Propionamide(C)@10; Propionamide(C)@14		2116.9	706.641	2116.88	706.634	3
22	Erbb2	99	MELAAWCR	Oxidation(M)@1; Propionamide(C)@7		1065.48	533.745	1065.47	533.744	2
22	Erbb2	99	NNQLAPVDMDTNR	Oxidation(M)@9		1502.68	752.346	1502.68	752.346	2
22	Erbb2	99	NNQLAPVDMDTNR	Oxidation(M)@9		1502.63	501.885	1502.68	501.9	3
22	Erbb2	99	SLTEILK			802.448	402.231	802.48	402.247	2
22	Erbb2	84.01	VKHVPLQR		missed K-H@2	975.614	488.814	975.598	488.806	2
22	Erbb2	99	YALAVLDNR			1033.54	517.779	1033.56	517.785	2
22	Erbb2	99	YALAVLDNRDPLDNVTTAAPGR	Deamidated(N)@8	missed R-D@9	2341.24	781.42	2342.19	781.736	3
22	Erbb2	99	YALAVLDNRDPLDNVTTAAPGR		missed R-D@9	2341.23	781.418	2341.2	781.408	3
23	Fgfr1	99	DCWHAVPSQRPTFK	Propionamide(C)@2		1741.69	581.569	1741.84	581.619	3
23	Fgfr1	72.02	DGVQLVESNR	Deamidated(N)@9		1117.15	559.581	1116.54	559.278	2
23	Fgfr1	99	GMEYLASKK	Oxidation(M)@2	missed K-K@8	1041.38	521.699	1041.52	521.766	2
23	Fgfr1	99	GMEYLASKK		missed K-K@8	1025.38	513.696	1025.52	513.768	2
23	Fgfr1	99	IADFGLAR			861.347	431.681	861.471	431.743	2
23	Fgfr1	99	IGPDNLPYVQILK			1468.7	735.355	1468.83	735.422	2
23	Fgfr1	99	ITGEEVEVR			1030.41	516.212	1030.53	516.272	2
23	Fgfr1	99	LRDDVQSINWLR		missed R-D@2	1512.94	505.319	1513.8	505.607	3
23	Fgfr1	96.73	NVLVTEDNVMK	Oxidation(M)@10		1276.49	639.253	1276.63	639.324	2
23	Fgfr1	94.85	NVLVTEDNVMK			1260.54	631.278	1260.64	631.326	2
23	Fgfr1	99	QLVEDLDR			986.43	494.222	986.503	494.259	2
23	Fgfr1	95.94	QLVEDLDR	Gln->pyro-Glu@N-term		969.366	485.69	969.477	485.746	2
23	Fgfr1	97.22	SPHRPILQAGLPANK			1598.79	533.936	1597.91	533.642	3
23	Fgfr1	99	WMAPEALFDR			1234.44	618.225	1234.58	618.297	2
23	Fgfr1	99	WMAPEALFDR	Oxidation(M)@2		1250.47	626.241	1250.58	626.295	2
24	Fgfr4	94.54	AEAFGMDPSRPDQTSTVAVK			2106.79	703.27	2106.01	703.009	3
24	Fgfr4	69.63	AEAFGMDPSRPDQTSTVAVK	Oxidation(M)@6		2122.8	708.608	2122	708.341	3
24	Fgfr4	99	CPAAGNPMPTIHWLK	Propionamide(C)@1		1705.69	853.854	1705.84	853.929	2
24	Fgfr4	98.54	CPAAGNPMPTIHWLK	Propionamide(C)@1		1705.61	569.544	1705.84	569.622	3
24	Fgfr4	91.59	CPAAGNPMPTIHWLK	Propionamide(C)@1; Oxidation(M)@8		1721.67	574.897	1721.84	574.953	3
24	Fgfr4	99	DGQAFHGENR			1129.37	565.692	1129.49	565.752	2
24	Fgfr4	99	DNASDKDLADLVSEMEVMK	Oxidation(M)@15; Oxidation(M)@18		2140.73	714.583	2140.95	714.657	3
24	Fgfr4	94.97	DNASDKDLADLVSEMEVMK			2108.72	703.916	2108.96	703.994	3
24	Fgfr4	84.61	DNASDKDLADLVSEMEVMK	Oxidation(M)@15		2124.75	709.256	2124.96	709.326	3
24	Fgfr4	99	ECWHAAPSQRPTFK	Propionamide(C)@2		1727.65	576.89	1727.82	576.947	3
24	Fgfr4	99	GMQYLESR	Oxidation(M)@2		998.352	500.183	998.449	500.232	2
24	Fgfr4	99	GMQYLESR			982.398	492.207	982.454	492.234	2
24	Fgfr4	99	GRLEIASFLPEDAGR		missed R-L@2	1629.64	544.219	1629.85	544.29	3
24	Fgfr4	98.63	GRLEIASFLPEDAGR		missed R-L@2	1629.72	815.869	1629.85	815.931	2
24	Fgfr4	99	GTYTCLVENSLGSIR	Propionamide(C)@5		1682.67	842.343	1682.83	842.422	2
24	Fgfr4	99	GVHHIDYYK			1130.41	566.213	1130.55	566.283	2
24	Fgfr4	99	GVHHIDYYKK		missed K-K@9	1258.51	630.264	1258.65	630.33	2
24	Fgfr4	99	GVHHIDYYKK		missed K-K@9	1258.6	420.539	1258.65	420.556	3
24	Fgfr4	99	HQHWSLVMESVVPSDR			1905.75	636.257	1905.92	636.312	3
24	Fgfr4	99	IADFGLAR			861.347	431.681	861.471	431.743	2
24	Fgfr4	99	KLHAVPAGNTVK		missed K-L@1	1233.6	617.807	1233.72	617.867	2
24	Fgfr4	99	LEIASFLPEDAGR			1416.57	709.294	1416.72	709.37	2
24	Fgfr4	90.58	LEIASFLPEDAGR			1416.57	473.198	1416.72	473.249	3
24	Fgfr4	99	LHAVPAGNTVK			1105.51	553.764	1105.62	553.819	2
24	Fgfr4	99	LVLGKPLGEGCFGQVVR	Propionamide(C)@11		1841.82	614.947	1842.02	615.013	3
24	Fgfr4	98.68	LVLGKPLGEGCFGQVVR	Propionamide(C)@11		1841.85	921.934	1842.02	922.017	2
24	Fgfr4	99	MERPPNCPSELYGLMR	Propionamide(C)@7		1962.77	655.264	1962.91	655.311	3
24	Fgfr4	99	MERPPNCPSELYGLMR	Oxidation(M)@1; Propionamide(C)@7		1978.78	660.601	1978.91	660.643	3
24	Fgfr4	99	NVLVTEDDVMK			1261.47	631.742	1261.62	631.818	2
24	Fgfr4	99	NVLVTEDDVMK	Oxidation(M)@10		1277.46	639.737	1277.62	639.816	2
24	Fgfr4	93.14	NVLVTEDDVMK	Deamidated(N)@1		1263.47	632.744	1262.61	632.31	2
24	Fgfr4	96.63	QFSLESR	Gln->pyro-Glu@N-term		848.31	425.162	848.403	425.209	2
24	Fgfr4	99	QLVEALDK	Gln->pyro-Glu@N-term		897.338	449.676	897.481	449.748	2
24	Fgfr4	81.52	QPVTIQK			812.359	407.187	812.476	407.245	2
24	Fgfr4	99	RPPGPDLSPDGPR			1359.51	454.178	1359.69	454.237	3
24	Fgfr4	99	TLSSSSSGHVYPQQAPYWTHPQR			2613.92	654.487	2613.24	654.316	4
24	Fgfr4	66.25	TLSSSSSGHVYPQQAPYWTHPQR			2613.02	872.014	2613.24	872.086	3
24	Fgfr4	99	TTDINSSEVEVLYLR			1737.72	869.869	1737.88	869.947	2
24	Fgfr4	99	TTDINSSEVEVLYLR			1737.68	580.233	1737.88	580.3	3
24	Fgfr4	99	VLLAVSEEYLDLR			1518.69	760.353	1518.83	760.422	2
24	Fgfr4	99	VYSDAQPHIQWLK			1583.66	792.839	1583.81	792.912	2
24	Fgfr4	99	WMAPEALFDR			1234.44	618.225	1234.58	618.297	2
24	Fgfr4	99	WMAPEALFDR	Oxidation(M)@2		1250.47	626.241	1250.58	626.295	2
24	Fgfr4	99	YSYLLDVLER			1269.52	635.768	1269.66	635.838	2
25	Flt3	99	DILSDSSYVVR			1252.56	627.288	1252.63	627.322	2
25	Flt3	99	DTQLYVLR			1006.49	504.255	1006.54	504.28	2
25	Flt3	99	DYEYDLK			944.354	473.184	944.413	473.214	2
25	Flt3	98.9	EALMSELK			919.395	460.705	919.468	460.742	2
25	Flt3	99	ESCKEEGPAVVR	Propionamide(C)@3		1373.65	687.831	1373.66	687.838	2
25	Flt3	92.55	ESCKEEGPAVVR	Propionamide(C)@3		1373.59	458.872	1373.66	458.894	3
25	Flt3	99	GLEDGYSISK			1067.46	534.738	1067.51	534.764	2
25	Flt3	99	GMEFLEFK	Oxidation(M)@2		1015.42	508.715	1015.47	508.742	2
25	Flt3	99	GMEFLEFK			999.372	500.693	999.474	500.744	2
25	Flt3	99	GSPEDLQCAPR	Propionamide(C)@8		1242.49	622.253	1242.57	622.29	2
25	Flt3	99	HPSQSALVTILEK			1421.68	474.902	1421.79	474.937	3
25	Flt3	99	HPSQSALVTILEK			1421.73	711.874	1421.79	711.901	2
25	Flt3	96.55	HSSLGCQPHFDLQNR	Propionamide(C)@6		1808.83	603.949	1808.84	603.953	3
25	Flt3	99	ICDFGLAR	Propionamide(C)@2		964.443	483.229	964.48	483.247	2
25	Flt3	99	KVFGQWVSSSTLNMSEAGK	Oxidation(M)@14	missed K-V@1	2070.92	691.315	2071	691.342	3
25	Flt3	99	NVLVTHGK			866.459	434.237	866.497	434.256	2
25	Flt3	99	SPNCTEEIPEGVWNK	Propionamide(C)@4		1772.78	887.398	1772.8	887.409	2
25	Flt3	99	SPNCTEEIPEGVWNK	Propionamide(C)@4		1772.69	591.905	1772.8	591.942	3
25	Flt3	73.78	TWTEIFK			923.406	462.71	923.475	462.745	2
25	Flt3	99	VGEPLWIR			968.445	485.23	968.544	485.279	2
25	Flt3	99	VLGSGAFGR			862.408	432.211	862.466	432.24	2
25	Flt3	99	VLHELFGTDIR			1298.67	650.341	1298.7	650.356	2
25	Flt3	90.94	VLHELFGTDIR			1298.71	433.909	1298.7	433.907	3
25	Flt3	99	VMNATAYGISK			1153.53	577.772	1153.58	577.797	2
25	Flt3	99	VMNATAYGISK	Oxidation(M)@2		1169.51	585.762	1169.58	585.795	2
26	Igf1r	99	AENGPGPGVLVLR			1277.69	639.85	1277.71	639.862	2
26	Igf1r	98.41	AENGPGPGVLVLR			1277.76	426.926	1277.71	426.91	3
26	Igf1r	99	ALPLPQSSTC	Propionamide(C)@10		1086.51	544.262	1086.54	544.276	2
26	Igf1r	95.61	ASCESDVLR	Propionamide(C)@3		1049.5	525.756	1049.48	525.748	2
26	Igf1r	89.77	AVTLTMVENDHIR	Oxidation(M)@6		1513.74	757.877	1513.76	757.885	2
26	Igf1r	50.62	DIYETDYYR			1236.51	619.262	1236.53	619.272	2
26	Igf1r	99	ELGQGSFGMVYEGVAK	Oxidation(M)@9		1686.78	844.397	1686.79	844.403	2
26	Igf1r	77.54	GNLLINIR			911.505	456.76	911.555	456.785	2
26	Igf1r	99	GVVKDEPETR			1128.57	565.294	1128.58	565.296	2
26	Igf1r	63.27	HSHALVSLSFLK			1337.6	669.809	1337.75	669.88	2
26	Igf1r	98.72	IEFLNEASVMK			1279.62	640.816	1279.65	640.831	2
26	Igf1r	99	LCVSEIYR	Propionamide(C)@2		1052.52	527.265	1052.53	527.273	2
26	Igf1r	99	LGCSASNFVFAR	Propionamide(C)@3		1341.64	671.826	1341.65	671.832	2
26	Igf1r	93.92	MYFAFNPK			1016.52	509.266	1016.48	509.247	2
26	Igf1r	99	NCMVAEDFTVK	Propionamide(C)@2; Oxidation(M)@3		1342.62	672.317	1342.59	672.302	2
26	Igf1r	99	SEILYIR			892.447	447.231	892.502	447.258	2
26	Igf1r	99	TVNEAASMR			977.456	489.735	977.46	489.737	2
26	Igf1r	84.44	TVNEAASMR	Oxidation(M)@8		993.407	497.711	993.455	497.735	2
26	Igf1r	99	YADGTIDVEEVTENPK			1778.81	890.414	1778.82	890.418	2
26	Igf1r	56.04	YGSQVEDQRECVSR	Propionamide(C)@11	missed R-E@9	1725.81	576.279	1725.77	576.265	3
27	Insr	91.88	DIIKGEAETR		missed K-G@4	1130.55	566.282	1130.59	566.304	2
27	Insr	50.62	DIYETDYYR			1236.51	619.262	1236.53	619.272	2
27	Insr	99	DLFPNLTVIR			1186.58	594.299	1186.67	594.343	2
27	Insr	97.74	ECLGNCSEPDDPTK	Propionamide(C)@2; Propionamide(C)@6		1648.47	825.241	1648.67	825.343	2
27	Insr	59.08	EGGSSLSIKR		missed K-R@9	1032.57	517.293	1032.56	517.285	2
27	Insr	98.75	ELGQGSFGMVYEGNAK	Oxidation(M)@9		1701.81	851.912	1701.77	851.891	2
27	Insr	99	EPNGLIVLYEVSYR			1650.66	826.339	1650.86	826.438	2
27	Insr	99	ESLVISGLR			972.556	487.285	972.56	487.287	2
27	Insr	79.3	GLKPWTQYAIFVK			1549.71	775.86	1549.87	775.94	2
27	Insr	99	GLSPGNYSVR			1048.55	525.284	1048.53	525.272	2
27	Insr	99	HNLTITQGK			1010.53	506.271	1010.55	506.283	2
27	Insr	98.72	IEFLNEASVMK			1279.62	640.816	1279.65	640.831	2
27	Insr	99	IELQACNQDSPDER	Propionamide(C)@6		1687.57	844.79	1687.75	844.881	2
27	Insr	97.64	LFFHYNPK			1064.52	533.266	1064.54	533.279	2
27	Insr	99	QAEDSELFELDYCLK	Gln->pyro-Glu@N-term; Propionamide(C)@13		1855.58	928.797	1855.82	928.917	2
27	Insr	99	SHGCTAEGLCCHK	Propionamide(C)@4; Propionamide(C)@10; Propionamide(C)@11		1557.68	520.234	1557.65	520.224	3
27	Insr	99	TIDSVTSAQELR			1318.68	660.349	1318.67	660.344	2
27	Insr	88.52	TLVTFSDER			1066.5	534.258	1066.53	534.272	2
27	Insr	99	TNCPATVINGQFVER	Propionamide(C)@3		1718.63	860.321	1718.84	860.428	2
27	Insr	98.43	TNGDQASCENELLK	Deamidated(N)@2; Propionamide(C)@8		1592.71	797.363	1592.7	797.357	2
27	Insr	91.93	TNGDQASCENELLK	Propionamide(C)@8		1591.53	796.772	1591.71	796.865	2
27	Insr	99	TVNESASLR			975.536	488.775	975.499	488.757	2
27	Insr	99	VCQILEGEK	Propionamide(C)@2		1088.53	545.271	1088.55	545.284	2
28	Mst1r	99	CFLHELEPR	Propionamide(C)@1		1213.6	607.805	1213.59	607.803	2
28	Mst1r	98.95	CFLHELEPR	Propionamide(C)@1		1213.63	405.55	1213.59	405.538	3
28	Mst1r	65.44	ELVLDCHFAPK	Propionamide(C)@6		1341.68	671.845	1341.68	671.845	2
28	Mst1r	99	GAPEGTQPYPVLQAAHSAPVDAK			2303.17	768.732	2303.15	768.725	3
28	Mst1r	92.31	GLDFFQTPSFCPNPVSR	Propionamide(C)@11		1981.92	991.967	1981.94	991.975	2
28	Mst1r	99	LNAVEPEIGDYR			1374.68	688.35	1374.68	688.346	2
28	Mst1r	99	LSAASTNLNWQCPR	Propionamide(C)@12		1630.8	816.405	1630.79	816.402	2
28	Mst1r	99	RGAPEGTQPYPVLQAAHSAPVDAK		missed R-G@1	2459.31	820.776	2459.26	820.759	3
28	Mst1r	99	SDTSGFQPGFPSLSVLPK			1862.91	621.976	1862.94	621.988	3
28	Mst1r	98.6	SDTSGFQPGFPSLSVLPK			1862.93	932.473	1862.94	932.478	2
28	Mst1r	99	VQATAAYEDSTNSAVFVATR			2099.99	701.004	2100.01	701.011	3
28	Mst1r	99	YLASYLIK			969.525	485.77	969.554	485.784	2
28	Mst1r	99	YVVPSFSAGGR			1138.56	570.289	1138.58	570.296	2
29	Ntrk2	97.65	ASLACPTSCK	Propionamide(C)@5; Propionamide(C)@9		1121.52	561.768	1121.52	561.768	2
29	Ntrk2	99	GFVLFHK			846.475	424.245	846.475	424.245	2
29	Ntrk2	99	GFVLFHKIPLDG		missed K-I@7	1341.72	671.87	1341.74	671.88	2
29	Ntrk2	99	HMNETSHTQGSLR			1496.69	749.353	1496.68	749.347	2
29	Ntrk2	99	HMNETSHTQGSLR	Oxidation(M)@2		1512.69	757.35	1512.67	757.344	2
29	Ntrk2	99	HMNETSHTQGSLR			1496.71	499.911	1496.68	499.9	3
29	Ntrk2	99	HMNETSHTQGSLR	Oxidation(M)@2		1512.69	505.236	1512.67	505.232	3
29	Ntrk2	73.69	HMNETSHTQGSLR	Deamidated(N)@3		1497.72	500.246	1497.66	500.228	3
29	Ntrk2	99	ITNISSDDSGK			1135.51	568.761	1135.54	568.775	2
29	Ntrk2	99	IWCTEPSPGIVAFPR	Propionamide(C)@3		1742.86	872.437	1742.88	872.448	2
29	Ntrk2	99	IWCTEPSPGIVAFPR	Propionamide(C)@3		1742.86	581.959	1742.88	581.968	3
29	Ntrk2	99	LAAPNLTVEEGK			1240.66	621.337	1240.67	621.34	2
29	Ntrk2	94.17	LEPNSVDPENITEILIANQK			2236.16	746.393	2236.16	746.393	3
29	Ntrk2	99	NEYGKDER			1009.45	505.732	1009.45	505.731	2
29	Ntrk2	87.12	NKLTSLSR		missed K-L@2	917.529	459.772	917.529	459.772	2
29	Ntrk2	98.44	NLTIVDSGLK			1058.57	530.292	1058.6	530.306	2
29	Ntrk2	65.33	NLTIVDSGLK	Deamidated(N)@1		1059.58	530.797	1059.58	530.798	2
29	Ntrk2	99	NMPLANLQIPNCGLPSAR	Propionamide(C)@12		1979	990.508	1979.01	990.511	2
29	Ntrk2	99	NMPLANLQIPNCGLPSAR	Oxidation(M)@2; Propionamide(C)@12		1994.99	998.503	1995	998.509	2
29	Ntrk2	98.1	NMPLANLQIPNCGLPSAR	Oxidation(M)@2; Deamidated(N)@6; Propionamide(C)@12		1996.02	666.348	1995.99	666.336	3
29	Ntrk2	96.34	NMPLANLQIPNCGLPSAR	Propionamide(C)@12		1979.21	660.743	1979.01	660.677	3
29	Ntrk2	99	RLEIINEDDVEAYVGLR		missed R-L@1	2003.08	668.699	2003.03	668.685	3
29	Ntrk2	99	SNEIPSTDVADQSNR			1631.73	544.918	1631.74	544.92	3
29	Ntrk2	99	SNEIPSTDVADQSNR			1631.74	816.876	1631.74	816.877	2
29	Ntrk2	99	SNEIPSTDVADQSNR	Deamidated(N)@2		1632.76	817.385	1632.72	817.369	2
29	Ntrk2	99	SNEIPSTDVADQSNR	Deamidated(N)@14		1632.81	545.276	1632.72	545.248	3
29	Ntrk2	98.45	SSPDTQDLYCLNESSK	Propionamide(C)@10		1856.78	619.935	1856.81	619.944	3
29	Ntrk2	97.39	SSPDTQDLYCLNESSK	Propionamide(C)@10		1856.8	929.408	1856.81	929.412	2
30	Pdgfrb	99	AFHEDDEVQLSFK			1563.89	522.303	1563.72	522.247	3
30	Pdgfrb	99	AINISVIENGYVR	Deamidated(N)@9		1447.7	724.859	1447.77	724.891	2
30	Pdgfrb	89.15	DQLVLGR			799.395	400.705	799.455	400.735	2
30	Pdgfrb	70.49	DSNYISK			825.428	413.721	825.387	413.701	2
30	Pdgfrb	98.75	GGPIYIITEYCR	Propionamide(C)@11		1454.65	728.331	1454.72	728.369	2
30	Pdgfrb	85.52	HTFLQR			800.454	401.234	800.429	401.222	2
30	Pdgfrb	99	HVDQPLSVR			1049.56	525.789	1049.56	525.788	2
30	Pdgfrb	99	ICDFGLAR	Propionamide(C)@2		964.443	483.229	964.48	483.247	2
30	Pdgfrb	99	KLSPTPLGNSSK		missed K-L@1	1227.66	614.836	1227.68	614.848	2
30	Pdgfrb	79.51	KVDIPLHVPYDHQR		missed K-V@1	1715.91	572.976	1715.91	572.978	3
30	Pdgfrb	99	KYQQVDEEFLR		missed K-Y@1	1453.64	727.828	1453.72	727.867	2
30	Pdgfrb	99	LLETLGDVEIAELHR			1706.8	854.41	1706.92	854.467	2
30	Pdgfrb	99	LLETLGDVEIAELHR			1706.89	569.97	1706.92	569.981	3
30	Pdgfrb	90.53	LQVNVPVR	Deamidated(N)@4		924.549	463.282	924.539	463.277	2
30	Pdgfrb	99	LVEPVTDYLFGVPSR			1690.78	846.398	1690.89	846.454	2
30	Pdgfrb	92.76	LVEPVTDYLFGVPSR			1690.77	564.597	1690.89	564.638	3
30	Pdgfrb	87.61	MAQPAHASDEIYEIMQK			1960.76	981.386	1960.9	981.458	2
30	Pdgfrb	68.51	MAQPAHASDEIYEIMQK	Oxidation(M)@1		1976.77	989.392	1976.9	989.456	2
30	Pdgfrb	99	MEDTMGLPGVIPALVLR	Oxidation(M)@1; Oxidation(M)@5		1842.85	922.434	1842.96	922.486	2
30	Pdgfrb	98.36	MEDTMGLPGVIPALVLR			1810.86	604.626	1810.97	604.663	3
30	Pdgfrb	99	QALMSELK	Gln->pyro-Glu@N-term; Oxidation(M)@4		917.444	459.729	917.453	459.734	2
30	Pdgfrb	99	QALMSELK	Gln->pyro-Glu@N-term		901.451	451.733	901.458	451.736	2
30	Pdgfrb	90.63	QALMSELK			918.478	460.246	918.484	460.25	2
30	Pdgfrb	98.96	SDHPAILR			907.501	454.758	907.488	454.751	2
30	Pdgfrb	99	TLGSGAFGQVVEATAHGLSHSQATMK			2585.27	647.324	2584.27	647.075	4
30	Pdgfrb	99	VLELSESHPANGEQTIR			1878.85	940.433	1878.94	940.479	2
30	Pdgfrb	87.87	VSEAGYYTMR	Oxidation(M)@9		1191.5	596.756	1191.52	596.769	2
30	Pdgfrb	96.74	VTDPQLEVTLHEK			1507.77	503.597	1507.79	503.603	3
30	Pdgfrb	95.79	VVFEAYPMPSVLWLK			1777.82	889.919	1777.95	889.981	2
30	Pdgfrb	99	YADIESPSYMAPYDNYVPSAPER	Oxidation(M)@10; Deamidated(N)@15		2650.97	884.664	2651.14	884.72	3
30	Pdgfrb	94.71	YADIESPSYMAPYDNYVPSAPER	Deamidated(N)@15		2634	879.007	2635.14	879.388	3
30	Pdgfrb	92.61	YADIESPSYMAPYDNYVPSAPER			2633.94	878.988	2634.16	879.06	3
30	Pdgfrb	99	YGDLVDYLHR			1249.56	625.785	1249.61	625.812	2
30	Pdgfrb	99	YGDLVDYLHR			1249.63	417.551	1249.61	417.544	3
30	Pdgfrb	99	YQQVDEEFLR			1325.55	663.782	1325.63	663.82	2
30	Pdgfrb	99	YVSELILVR			1090.59	546.303	1090.64	546.327	2
31	Tgfbr1	98.41	DITPLKK		missed K-K@6	813.468	407.741	813.496	407.755	2
31	Tgfbr1	84.89	DLIYDMTTSGSGSGLPLLVQR	Oxidation(M)@6		2238.03	747.018	2238.12	747.047	3
31	Tgfbr1	99	EAEIYQTVMLR			1351.67	676.842	1351.68	676.848	2
31	Tgfbr1	99	EAEIYQTVMLR	Oxidation(M)@9		1367.66	684.835	1367.68	684.845	2
31	Tgfbr1	98.37	ECWYANGAAR	Propionamide(C)@2		1210.52	606.266	1210.52	606.267	2
31	Tgfbr1	67.65	GKWRGEEVAVK		missed K-W@2; missed R-G@4	1257.65	420.226	1257.68	420.235	3
31	Tgfbr1	52.89	GKWRGEEVAVK		missed K-W@2; missed R-G@4	1257.67	629.841	1257.68	629.849	2
31	Tgfbr1	99	HDSATDTIDIAPNHR			1661.75	554.924	1661.78	554.933	3
31	Tgfbr1	99	HDSATDTIDIAPNHR	Deamidated(N)@13		1662.78	555.268	1662.76	555.261	3
31	Tgfbr1	99	HDSATDTIDIAPNHR	Deamidated(N)@13		1662.79	832.404	1662.76	832.387	2
31	Tgfbr1	99	HENILGFIAADNK			1440.73	721.374	1440.74	721.375	2
31	Tgfbr1	99	HENILGFIAADNK			1440.98	481.335	1440.74	481.253	3
31	Tgfbr1	99	HENILGFIAADNK	Deamidated(N)@12		1441.7	721.858	1441.72	721.867	2
31	Tgfbr1	66.6	IMRECWYANGAAR	Oxidation(M)@2; Propionamide(C)@5	missed R-E@3	1626.78	543.268	1626.74	543.254	3
31	Tgfbr1	99	KLQENKGPFSEK		missed K-L@1; missed K-G@6	1403.8	468.942	1403.74	468.921	3
31	Tgfbr1	85.66	KNGTCCIADLGLAVR	Propionamide(C)@5; Propionamide(C)@6	missed K-N@1	1674.86	559.295	1674.85	559.292	3
31	Tgfbr1	88.18	KTLSQLSQQEGIK		missed K-T@1	1458.78	730.396	1458.8	730.409	2
31	Tgfbr1	99	KTLSQLSQQEGIKM	Oxidation(M)@14	missed K-T@1; missed K-M@13	1605.9	536.306	1605.84	536.287	3
31	Tgfbr1	99	KVVCEQK	Propionamide(C)@4	missed K-V@1	903.464	452.739	903.485	452.75	2
31	Tgfbr1	99	LQENKGPFSEK		missed K-G@5	1275.65	638.831	1275.65	638.83	2
31	Tgfbr1	97.18	LQENKGPFSEK	Deamidated(N)@4	missed K-G@5	1276.63	639.324	1276.63	639.322	2
31	Tgfbr1	90.19	LQENKGPFSEK		missed K-G@5	1275.63	426.216	1275.65	426.223	3
31	Tgfbr1	99	NGTCCIADLGLAVR	Propionamide(C)@4; Propionamide(C)@5		1546.75	774.383	1546.76	774.387	2
31	Tgfbr1	99	NGTCCIADLGLAVR	Deamidated(N)@1; Propionamide(C)@4; Propionamide(C)@5		1547.76	774.888	1547.74	774.879	2
31	Tgfbr1	98.7	RYMAPEVLDDSINMK	Oxidation(M)@3	missed R-Y@1	1796.8	599.94	1796.84	599.955	3
31	Tgfbr1	92.74	RYMAPEVLDDSINMK	Oxidation(M)@3; Oxidation(M)@14	missed R-Y@1	1812.8	605.274	1812.84	605.287	3
31	Tgfbr1	80.1	RYMAPEVLDDSINMK		missed R-Y@1	1780.85	594.624	1780.85	594.624	3
31	Tgfbr1	99	SKNILVK		missed K-N@2	800.51	401.262	800.512	401.263	2
31	Tgfbr1	99	SLIMVMMEDYK	Oxidation(M)@4; Oxidation(M)@6; Oxidation(M)@7		1406.56	704.288	1406.61	704.314	2
31	Tgfbr1	99	SLIMVMMEDYK	Oxidation(M)@4; Oxidation(M)@7		1390.62	696.319	1390.62	696.316	2
31	Tgfbr1	98.25	SLIMVMMEDYK	Oxidation(M)@6; Oxidation(M)@7		1390.6	696.307	1390.62	696.316	2
31	Tgfbr1	58.75	SLIMVMMEDYK	Oxidation(M)@4		1374.59	688.302	1374.62	688.319	2
31	Tgfbr1	87.81	SLIMVMMEDYKDITPLK	Oxidation(M)@4; Oxidation(M)@6; Oxidation(M)@7		2074.07	692.364	2074	692.342	3
31	Tgfbr1	75.65	SLIMVMMEDYKDITPLK	Oxidation(M)@6; Oxidation(M)@7		2058.04	687.02	2058.01	687.01	3
31	Tgfbr1	69.38	SLIMVMMEDYKDITPLKK	Oxidation(M)@4; Oxidation(M)@6; Oxidation(M)@7	missed K-K@17	2202.09	735.038	2202.1	735.04	3
31	Tgfbr1	99	TIVLQESIGK			1086.61	544.31	1086.63	544.322	2
31	Tgfbr1	99	TLSQLSQQEGIK			1330.7	666.356	1330.71	666.362	2
31	Tgfbr1	99	TLSQLSQQEGIKM	Oxidation(M)@13	missed K-M@12	1477.77	739.892	1477.74	739.88	2
31	Tgfbr1	99	TLSQLSQQEGIKM		missed K-M@12	1461.73	731.871	1461.75	731.882	2
31	Tgfbr1	96	TLSQLSQQEGIKM		missed K-M@12	1461.71	488.246	1461.75	488.257	3
31	Tgfbr1	87.26	TLSQLSQQEGIKM	Oxidation(M)@13	missed K-M@12	1477.63	493.55	1477.74	493.589	3
31	Tgfbr1	99	WRGEEVAVK		missed R-G@2	1072.56	537.289	1072.57	537.291	2
31	Tgfbr1	99	YMAPEVLDDSINMK	Oxidation(M)@2; Oxidation(M)@13		1656.75	829.382	1656.74	829.376	2
31	Tgfbr1	99	YMAPEVLDDSINMK			1625.74	813.875	1624.75	813.381	2
31	Tgfbr1	99	YMAPEVLDDSINMK	Oxidation(M)@2		1640.73	821.374	1640.74	821.379	2
31	Tgfbr1	99	YMAPEVLDDSINMK	Oxidation(M)@13		1640.75	821.381	1640.74	821.379	2
31	Tgfbr1	94.82	YMAPEVLDDSINMK	Oxidation(M)@2; Oxidation(M)@13		1656.72	553.247	1656.74	553.253	3
31	Tgfbr1	93.24	YMAPEVLDDSINMK			1624.74	542.586	1624.75	542.59	3
31	Tgfbr1	90.23	YMAPEVLDDSINMK	Oxidation(M)@13		1640.71	547.909	1640.74	547.921	3
31	Tgfbr1	86.61	YMAPEVLDDSINMK	Oxidation(M)@2; Deamidated(N)@12; Oxidation(M)@13		1657.77	829.892	1657.72	829.868	2
31	Tgfbr1	70.38	YMAPEVLDDSINMK	Oxidation(M)@2; Deamidated(N)@12		1641.71	821.864	1641.73	821.871	2
31	Tgfbr1	98.01	YMAPEVLDDSINMKHFESFK	Deamidated(N)@12; Oxidation(M)@13	missed K-H@14	2416.18	806.402	2417.09	806.705	3
31	Tgfbr1	99	YMAPEVLDDSINMKHFESFKR	Oxidation(M)@2; Oxidation(M)@13	missed K-H@14; missed K-R@20	2588.27	648.075	2588.2	648.058	4
31	Tgfbr1	94	YTVTVEGMIK			1139.58	570.796	1139.59	570.802	2
32	Tie1	99	DFAGELEVLCK	Propionamide(C)@10		1293.54	647.777	1293.63	647.821	2
32	Tie1	99	EHGTASTLSSR			1144.5	573.256	1144.55	573.281	2
32	Tie1	97.75	ENISFPQAR			1060.49	531.251	1060.53	531.272	2
32	Tie1	99	EYASENDHR			1119.4	560.707	1119.46	560.736	2
32	Tie1	99	FASDAANGMQYLSEK			1630.53	816.271	1630.73	816.372	2
32	Tie1	99	FASDAANGMQYLSEK	Oxidation(M)@9		1646.55	824.282	1646.72	824.37	2
32	Tie1	99	FASDAANGMQYLSEK	Deamidated(N)@7		1632.55	817.284	1631.71	816.864	2
32	Tie1	99	FGQSCQEQCPGTAGCR	Propionamide(C)@5; Propionamide(C)@9; Propionamide(C)@15		1883.49	942.753	1883.77	942.893	2
32	Tie1	97.62	GEEVYVK			822.452	412.233	822.412	412.213	2
32	Tie1	99	IADFGLSR			877.469	439.742	877.466	439.74	2
32	Tie1	99	INCAAAGNPFPVR	Propionamide(C)@3		1399.55	700.785	1399.7	700.859	2
32	Tie1	98.86	LGHHPNIINLLGACENR	Propionamide(C)@14		1940.84	647.955	1941	648.007	3
32	Tie1	99	LQCQCQNGGTCDR	Propionamide(C)@3; Propionamide(C)@5; Propionamide(C)@11		1638.48	820.249	1637.67	819.843	2
32	Tie1	99	LRKPDGTMLLSTK		missed R-K@2	1458.83	487.284	1458.82	487.282	3
32	Tie1	99	NCDDEVYELMR	Propionamide(C)@2		1456.43	729.222	1456.6	729.305	2
32	Tie1	99	NGSHQVTLR			1010.54	506.275	1010.53	506.27	2
32	Tie1	98.27	NGSHQVTLR	Deamidated(N)@1		1011.5	506.756	1011.51	506.762	2
32	Tie1	99	NVLVGENLASK			1142.58	572.298	1142.63	572.322	2
32	Tie1	99	QLVVSPLVSFSGDGPISSVR			2042.86	681.961	2043.1	682.041	3
32	Tie1	96.47	QLVVSPLVSFSGDGPISSVR	Gln->pyro-Glu@N-term		2025.91	676.31	2026.07	676.365	3
32	Tie1	52.5	SSDPPLLLEK			1097.52	549.769	1097.6	549.806	2
32	Tie1	99	SSDPPLLLEKDDR			1483.61	742.811	1483.75	742.883	2
32	Tie1	99	TALLTGLTPGTHYQLDVR			1954.9	652.64	1955.05	652.69	3
32	Tie1	76.53	TALLTGLTPGTHYQLDVR			1954.75	978.381	1955.05	978.531	2
32	Tie1	99	VLETDPAFAR			1117.51	559.763	1117.58	559.796	2
32	Tie1	99	VLYVHNSPGAHLFPDK			1792.79	897.405	1792.93	897.47	2
32	Tie1	96.17	VLYVHNSPGAHLFPDK			1792.82	598.612	1792.93	598.649	3
32	Tie1	90.59	VLYVHNSPGAHLFPDK	Deamidated(N)@6		1792.81	598.612	1793.91	598.977	3
32	Tie1	99	VLYVHNSPGAHLFPDKVTHTVNK		missed K-V@16	2572.2	644.058	2572.35	644.096	4
32	Tie1	94.97	VPPVPLTAPR			1045.57	523.794	1045.63	523.821	2
32	Tie1	98.32	VTHTVNKGDTAVLSAHVHK		missed K-G@7	2013.94	672.32	2013.08	672.032	3
34	Tnfrsf10b	93.9	CNITTNTVCR	Propionamide(C)@1; Deamidated(N)@6; Propionamide(C)@9		1267.23	634.622	1266.57	634.292	2
34	Tnfrsf10b	65.4	DPESANSVHSSLLDR	Deamidated(N)@6		1627.22	543.415	1626.75	543.257	3
34	Tnfrsf10b	95.57	GCERDPESANSVHSSLLDR	Propionamide(C)@2	missed R-D@4	2143.41	536.86	2141.98	536.501	4
34	Tnfrsf10b	99	GPCLAGQYLSEGNCKPCR	Propionamide(C)@3; Propionamide(C)@14; Propionamide(C)@17		2108.66	528.171	2107.96	527.997	4
34	Tnfrsf10b	99	LLVPVNGNDSADDLK			1569.06	524.028	1568.8	523.942	3
34	Tnfrsf10b	99	LLVPVNGNDSADDLK	Deamidated(N)@6		1569.92	524.312	1569.79	524.27	3
34	Tnfrsf10b	99	MEPPGPSTPTASAAAR			1539.74	514.252	1539.74	514.252	3
34	Tnfrsf10b	96.87	QLGLTDNQIQMVK	Oxidation(M)@11		1501.69	501.57	1502.78	501.933	3
34	Tnfrsf10b	90.48	QWLLCIK	Propionamide(C)@5		973.305	487.66	973.542	487.778	2
35	Tnfrsf12a	74.77	AAAGEQAPGTSPCSSGSSWSADLDK	Propionamide(C)@13		2449.98	817.667	2450.07	817.696	3
35	Tnfrsf12a	99	MASAWPR	Oxidation(M)@1		833.31	417.663	833.385	417.7	2
35	Tnfrsf12a	87.74	MASAWPR			817.343	409.679	817.391	409.703	2
36	Tnfrsf13c	98.71	EDADSALPR			972.345	487.18	972.451	487.233	2
36	Tnfrsf13c	99	HSVPVPATELGSTELVTTK			1964.8	655.939	1965.04	656.021	3
36	Tnfrsf13c	99	HSVPVPATELGSTELVTTK			1964.82	983.418	1965.04	983.528	2
36	Tnfrsf13c	99	HSVPVPATELGSTELVTTK			1964.79	492.205	1965.04	492.268	4
36	Tnfrsf13c	58.69	SRDSSVPTQCNQTECFDPLVR	Propionamide(C)@10; Propionamide(C)@15	missed R-D@2	2522.94	631.741	2523.15	631.794	4
37	Tnfrsf17	99	ADTELTR			804.417	403.216	804.398	403.206	2
37	Tnfrsf17	92.18	CSNPPATCQPYCDPSVTSSVK	Propionamide(C)@1; Propionamide(C)@8; Propionamide(C)@12		2396.99	800.004	2396.04	799.689	3
37	Tnfrsf17	99	DEPQSPGQLDGSAQLDK			1783.82	892.917	1783.82	892.919	2
37	Tnfrsf17	82.32	GDSDHFFPLPAMEEGATILVTTK	Oxidation(M)@12		2491.23	831.417	2491.19	831.405	3
37	Tnfrsf17	96.33	IRAGDDR		missed R-A@2	801.404	401.709	801.409	401.712	2
37	Tnfrsf17	99	MNPEALK	Oxidation(M)@1		817.382	409.698	817.4	409.707	2
37	Tnfrsf17	98.96	MNPEALKDEPQSPGQLDGSAQLDK	Oxidation(M)@1		2583.28	862.099	2583.21	862.078	3
37	Tnfrsf17	63.87	MNPEALKDEPQSPGQLDGSAQLDK	Oxidation(M)@1		2583.14	646.793	2583.21	646.81	4
37	Tnfrsf17	99	MNPEALKDEPQSPGQLDGSAQLDKADTELTR	Oxidation(M)@1	missed K-A@24	3369.69	843.429	3369.6	843.407	4
37	Tnfrsf17	95.42	SLEYTVEECTCEDCVK	Propionamide(C)@9; Propionamide(C)@11; Propionamide(C)@14		2062.83	688.618	2062.85	688.625	3
37	Tnfrsf17	74.33	SSVPTALQSVMGMEKPTHTR	Oxidation(M)@13		2172.06	544.023	2172.07	544.024	4
37	Tnfrsf17	72.87	SSVPTALQSVMGMEKPTHTR			2156.12	540.037	2156.07	540.025	4
38	Tnfrsf1a	70.61	DSLCPQGK	Propionamide(C)@4		917.34	459.677	917.428	459.721	2
38	Tnfrsf1a	99	EAQYSMLEAWR	Oxidation(M)@6		1398.59	700.302	1398.62	700.319	2
38	Tnfrsf1a	76.46	EAQYSMLEAWR			1382.57	692.292	1382.63	692.322	2
38	Tnfrsf1a	99	EMSQVEISPCQADKDTVCGCK	Oxidation(M)@2; Propionamide(C)@10; Propionamide(C)@18; Propionamide(C)@20		2498.98	833.999	2499.07	834.032	3
38	Tnfrsf1a	99	ESECVLCSHCK	Propionamide(C)@4; Propionamide(C)@7; Propionamide(C)@10		1449.55	725.782	1449.61	725.81	2
38	Tnfrsf1a	99	FMGLSEHEIER			1346.56	674.287	1346.63	674.322	2
38	Tnfrsf1a	98.59	FMGLSEHEIER	Oxidation(M)@2		1362.58	682.299	1362.62	682.319	2
38	Tnfrsf1a	79.44	FMGLSEHEIER			1346.59	449.87	1346.63	449.884	3
38	Tnfrsf1a	79.06	FMGLSEHEIER	Oxidation(M)@2		1362.58	455.202	1362.62	455.215	3
38	Tnfrsf1a	83.17	GTFTASQNYLR	Deamidated(N)@8		1257.55	629.781	1257.6	629.807	2
38	Tnfrsf1a	99	GTYLVSDCPSPGR	Propionamide(C)@8		1421.59	711.803	1421.66	711.838	2
38	Tnfrsf1a	99	HEDTLEVVGLVLSK			1537.68	513.566	1537.84	513.619	3
38	Tnfrsf1a	51.3	NNSICCTK	Propionamide(C)@5; Propionamide(C)@6		1023.42	512.716	1023.45	512.731	2
38	Tnfrsf1a	96.4	NPAPSSTTR			929.391	465.703	929.457	465.736	2
39	Tnfrsf21	99	AHTDCLGQNLEVVKPGTK	Propionamide(C)@5; Deamidated(N)@9		1980.93	661.318	1980.99	661.339	3
39	Tnfrsf21	96.33	AHTDCLGQNLEVVKPGTK	Propionamide(C)@5		1980.86	496.221	1980.01	496.01	4
39	Tnfrsf21	58.19	AHTDCLGQNLEVVKPGTK	Propionamide(C)@5		1979.91	990.962	1980.01	991.012	2
39	Tnfrsf21	99	ASSITALASCSR	Propionamide(C)@10		1236.5	619.257	1236.61	619.314	2
39	Tnfrsf21	99	AYAALQHWTIR			1328.63	665.321	1328.7	665.357	2
39	Tnfrsf21	99	CDSTSSGSSALSR	Propionamide(C)@1		1327.47	664.741	1327.57	664.791	2
39	Tnfrsf21	99	CFFVDESEPLLR	Propionamide(C)@1		1524.65	763.332	1524.73	763.371	2
39	Tnfrsf21	97.76	CFFVDESEPLLR	Propionamide(C)@1		1524.6	509.206	1524.73	509.25	3
39	Tnfrsf21	99	CKAHTDCLGQNLEVVKPGTK	Propionamide(C)@1; Propionamide(C)@7	missed K-A@2	2282.05	761.691	2282.15	761.724	3
39	Tnfrsf21	99	CKAHTDCLGQNLEVVKPGTK	Propionamide(C)@1; Propionamide(C)@7; Deamidated(N)@11	missed K-A@2	2282.05	761.691	2283.14	762.052	3
39	Tnfrsf21	95.23	CPAGTYVSEHCTNMSLR	Propionamide(C)@1; Propionamide(C)@11		2009.75	670.924	2009.88	670.966	3
39	Tnfrsf21	95.01	CPAGTYVSEHCTNMSLR	Propionamide(C)@1; Propionamide(C)@11; Oxidation(M)@14		2025.78	676.268	2025.87	676.297	3
39	Tnfrsf21	90.77	DIYQFLCNASER	Propionamide(C)@7		1528.58	765.296	1528.7	765.356	2
39	Tnfrsf21	85.74	EKKDTVLR		missed K-K@2	987.598	494.807	987.571	494.793	2
39	Tnfrsf21	96.34	ETDNVCGMR	Deamidated(N)@4; Propionamide(C)@6		1095.42	548.719	1095.43	548.724	2
39	Tnfrsf21	92.95	ETDNVCGMR	Propionamide(C)@6		1094.34	548.175	1094.45	548.232	2
39	Tnfrsf21	66.93	ETDNVCGMR	Propionamide(C)@6; Oxidation(M)@8		1110.34	556.177	1110.44	556.229	2
39	Tnfrsf21	99	EVAAFSNGYTADHER			1665.63	833.82	1665.74	833.876	2
39	Tnfrsf21	99	GLMEDTTQLETDK			1479.56	740.789	1479.68	740.845	2
39	Tnfrsf21	99	GLMEDTTQLETDK	Oxidation(M)@3		1495.54	748.778	1495.67	748.843	2
39	Tnfrsf21	99	GPEASLAQLISALR			1424.69	713.352	1424.8	713.407	2
39	Tnfrsf21	95.25	GTENEDVR			918.317	460.166	918.404	460.209	2
39	Tnfrsf21	99	GTFSDVPSSVMK			1253.5	627.76	1253.6	627.805	2
39	Tnfrsf21	99	GTFSDVPSSVMK	Oxidation(M)@11		1269.51	635.76	1269.59	635.803	2
39	Tnfrsf21	74.84	HENGIER	Deamidated(N)@3		854.3	428.157	854.388	428.201	2
39	Tnfrsf21	99	KGTENEDVR		missed K-G@1	1046.39	524.204	1046.5	524.257	2
39	Tnfrsf21	99	KKGTENEDVR		missed K-K@1; missed K-G@2	1174.48	588.248	1174.59	588.304	2
39	Tnfrsf21	87.66	LALPMSPSPLSPSPMPSPNVK	Oxidation(M)@5; Oxidation(M)@15		2177.96	726.995	2178.11	727.043	3
39	Tnfrsf21	99	LENSTLLTVEPSPLDK			1754.85	878.43	1754.93	878.472	2
39	Tnfrsf21	77.17	LENSTLLTVEPSPLDK	Deamidated(N)@3		1756	879.01	1755.91	878.964	2
39	Tnfrsf21	74.05	LENSTLLTVEPSPLDKNK		missed K-N@16	1996.92	666.646	1997.07	666.697	3
39	Tnfrsf21	71.13	LENSTLLTVEPSPLDKNK		missed K-N@16	1996.96	999.485	1997.07	999.541	2
39	Tnfrsf21	99	LFEIIGVK			917.491	459.753	917.559	459.787	2
39	Tnfrsf21	72.29	LLPSSMEATGEK			1261.55	631.782	1261.62	631.818	2
39	Tnfrsf21	99	LPCAALTDR	Propionamide(C)@3		1029.45	515.73	1029.53	515.771	2
39	Tnfrsf21	99	LVAAQVGSQWK			1185.52	593.767	1185.65	593.833	2
39	Tnfrsf21	99	NGHGIDILK	Deamidated(N)@1		966.438	484.226	966.513	484.264	2
39	Tnfrsf21	99	QDPSAIVEK	Gln->pyro-Glu@N-term		968.373	485.194	968.482	485.248	2
39	Tnfrsf21	99	QDPSAIVEK			985.411	493.713	985.508	493.761	2
39	Tnfrsf21	99	RNDVVEK		missed R-N@1	858.37	430.192	858.456	430.235	2
39	Tnfrsf21	98.9	SLTPTQNR			915.372	458.693	915.477	458.746	2
39	Tnfrsf21	99	SSTAIKAPK		missed K-A@6	901.419	451.717	901.523	451.769	2
39	Tnfrsf21	99	TKVPSGIEEGTVPDNTSSTSGK		missed K-V@2	2189.94	730.989	2190.07	731.029	3
39	Tnfrsf21	99	TKVPSGIEEGTVPDNTSSTSGK	Deamidated(N)@15	missed K-V@2	2190.95	731.324	2191.05	731.357	3
39	Tnfrsf21	85.53	TKVPSGIEEGTVPDNTSSTSGKEGTNR	Deamidated(N)@15	missed K-V@2	2747.16	687.797	2748.3	688.083	4
39	Tnfrsf21	99	TLSLPGTYR			1006.46	504.239	1006.54	504.28	2
39	Tnfrsf21	99	TTGQVLTCDK	Propionamide(C)@8		1135.44	568.73	1135.55	568.784	2
39	Tnfrsf21	99	VCSSCPAGTFTR	Propionamide(C)@2; Propionamide(C)@5		1369.53	685.774	1369.61	685.813	2
39	Tnfrsf21	99	VIEEIPQAEDKLDR		missed K-L@11	1653.85	827.934	1653.86	827.936	2
39	Tnfrsf21	99	VIEEIPQAEDKLDR		missed K-L@11	1653.72	552.246	1653.86	552.293	3
39	Tnfrsf21	99	VPSGIEEGTVPDNTSSTSGK			1960.78	654.601	1960.92	654.648	3
40	Tnfrsf8	99	APCSGNSPR	Propionamide(C)@3		958.31	480.162	958.429	480.222	2
40	Tnfrsf8	99	CTACVTCLPGLVEK	Propionamide(C)@1; Propionamide(C)@4; Propionamide(C)@7		1648.66	825.339	1648.8	825.407	2
40	Tnfrsf8	90.6	CTACVTCLPGLVEK	Propionamide(C)@1; Propionamide(C)@4; Propionamide(C)@7		1648.53	550.518	1648.8	550.607	3
40	Tnfrsf8	99	DTICELPSSGSGPNCSNPGDR	Propionamide(C)@4; Propionamide(C)@15		2246.75	749.924	2246.95	749.992	3
40	Tnfrsf8	99	KDTICELPSSGSGPNCSNPGDR	Propionamide(C)@5; Propionamide(C)@16		2374.9	792.641	2375.05	792.69	3
40	Tnfrsf8	99	KDTICELPSSGSGPNCSNPGDRK	Propionamide(C)@5; Propionamide(C)@16	missed R-K@22	2502.95	835.325	2503.14	835.388	3
40	Tnfrsf8	99	KQCAPDYYVNEDGK	Propionamide(C)@3	missed K-Q@1	1699.65	850.83	1699.75	850.883	2
40	Tnfrsf8	84.44	KQCAPDYYVNEDGK	Propionamide(C)@3	missed K-Q@1	1699.57	567.529	1699.75	567.591	3
40	Tnfrsf8	99	KTLTSHATPQAMPTLESPANDSAR		missed K-T@1	2522.98	631.753	2523.24	631.817	4
40	Tnfrsf8	99	KTLTSHATPQAMPTLESPANDSAR		missed K-T@1	2523.06	842.027	2523.24	842.087	3
40	Tnfrsf8	99	LHCSGEEVVK	Propionamide(C)@3		1170.45	586.234	1170.57	586.292	2
40	Tnfrsf8	95.39	NCCYQCPSGLSPTQPCPR	Propionamide(C)@2; Propionamide(C)@3; Propionamide(C)@6; Propionamide(C)@16		2235.8	746.275	2236.95	746.657	3
40	Tnfrsf8	99	NMTLELPSPGTLPDISTSENSK	Oxidation(M)@2		2345.93	782.984	2346.13	783.049	3
40	Tnfrsf8	99	QCAPDYYVNEDGK	Gln->pyro-Glu@N-term; Propionamide(C)@2		1554.48	778.246	1554.63	778.322	2
40	Tnfrsf8	97.47	QCAPDYYVNEDGK	Propionamide(C)@2		1571.53	786.771	1571.66	786.835	2
40	Tnfrsf8	96.04	QCAPDYYVNEDGK	Propionamide(C)@2		1572.52	525.181	1571.66	524.893	3
40	Tnfrsf8	97.82	TLTSHATPQAMPTLESPANDSAR	Oxidation(M)@11; Deamidated(N)@19		2411.97	804.998	2412.12	805.048	3
40	Tnfrsf8	93.24	TLTSHATPQAMPTLESPANDSAR			2394.95	799.324	2395.14	799.389	3
40	Tnfrsf8	85.13	TLTSHATPQAMPTLESPANDSAR	Deamidated(N)@19		2395.93	799.65	2396.13	799.717	3
40	Tnfrsf8	64.76	TLTSHATPQAMPTLESPANDSAR	Oxidation(M)@11		2411.02	804.682	2411.14	804.72	3
40	Tnfrsf8	99	TTCAGDLSHYPGEAAR	Propionamide(C)@3		1718.62	860.317	1718.77	860.391	2
40	Tnfrsf8	99	VTNLVQEDATELVK			1557.68	779.847	1557.82	779.92	2
40	Tnfrsf8	99	VTNLVQEDATELVK	Deamidated(N)@3		1558.66	780.339	1558.81	780.412	2
40	Tnfrsf8	99	VTNLVQEDATELVK			1557.56	520.193	1557.82	520.282	3
41	Tnfsf10	99	DLSFSQHFR			1135.53	568.773	1135.54	568.778	2
41	Tnfsf10	99	GHSFLNHVLFR			1325.7	663.859	1325.7	663.857	2
41	Tnfsf10	99	GHSFLNHVLFR	Deamidated(N)@6		1326.75	443.257	1326.68	443.235	3
41	Tnfsf10	72.58	GHSFLNHVLFR			1325.68	442.899	1325.7	442.907	3
41	Tnfsf10	97.22	IESWESSR			992.454	497.234	992.456	497.235	2
41	Tnfsf10	99	IGLACFSK	Propionamide(C)@5		908.453	455.234	908.479	455.247	2
41	Tnfsf10	71.04	KGHSFLNHVLFR		missed K-G@1	1453.8	727.909	1453.79	727.904	2
41	Tnfsf10	70.03	KGHSFLNHVLFR		missed K-G@1	1453.82	485.613	1453.79	485.605	3
41	Tnfsf10	99	MPSSGALK	Oxidation(M)@1		805.393	403.704	805.4	403.707	2
41	Tnfsf10	92.05	MPSSGALKDLSFSQHFR	Oxidation(M)@1		1922.95	641.991	1922.93	641.984	3
41	Tnfsf10	99	QLQDNYSK	Gln->pyro-Glu@N-term		977.409	489.712	977.445	489.73	2
41	Tnfsf10	98.53	QLSTPPLPR	Gln->pyro-Glu@N-term		990.52	496.267	990.55	496.282	2
41	Tnfsf10	91.22	QLSTPPLPR			1007.55	504.782	1007.58	504.795	2
41	Tnfsf10	99	QLVQYIYK			1053.59	527.801	1053.59	527.8	2
41	Tnfsf10	99	QLVQYIYK	Gln->pyro-Glu@N-term		1036.54	519.275	1036.56	519.287	2
41	Tnfsf10	99	SNSALIPISK			1028.6	515.305	1028.59	515.301	2
41	Tnfsf10	99	SNSALIPISK	Deamidated(N)@2		1029.54	515.777	1029.57	515.793	2
41	Tnfsf10	99	SNSALIPISKDGK			1328.72	665.367	1328.73	665.372	2
41	Tnfsf10	99	TFQDTISTVPEK			1364.67	683.342	1364.68	683.348	2
41	Tnfsf10	99	TKQLVQYIYK		missed K-Q@2	1282.7	642.356	1282.73	642.372	2
41	Tnfsf10	96.38	YTSYPDPIVLMK	Oxidation(M)@11		1441.68	481.568	1441.72	481.579	3
41	Tnfsf10	87.28	YTSYPDPIVLMK	Oxidation(M)@11		1441.7	721.859	1441.72	721.865	2
42	Tnfsf11	92.25	AQMDPNR			830.29	416.152	830.37	416.193	2
42	Tnfsf11	99	ELQHIVGPQR			1175.58	588.798	1175.64	588.828	2
42	Tnfsf11	99	FSGAPAMMEGSWLDVAQR	Oxidation(M)@7; Oxidation(M)@8		1983.77	992.893	1983.88	992.948	2
42	Tnfsf11	99	FSGAPAMMEGSWLDVAQR	Oxidation(M)@8		1967.78	984.895	1967.89	984.951	2
42	Tnfsf11	99	FSGAPAMMEGSWLDVAQR	Oxidation(M)@7		1967.77	984.891	1967.89	984.951	2
42	Tnfsf11	99	FSGAPAMMEGSWLDVAQR	Oxidation(M)@7		1967.77	656.932	1967.89	656.97	3
42	Tnfsf11	96.69	FSGAPAMMEGSWLDVAQR	Oxidation(M)@8		1967.74	656.922	1967.89	656.97	3
42	Tnfsf11	81.32	FSGAPAMMEGSWLDVAQR	Oxidation(M)@7; Oxidation(M)@8		1983.74	662.254	1983.88	662.301	3
42	Tnfsf11	99	GKPEAQPFAHLTINAASIPSGSHK	Deamidated(N)@14		2458.13	615.54	2458.26	615.572	4
42	Tnfsf11	92.99	GKPEAQPFAHLTINAASIPSGSHK			2457.16	820.062	2457.28	820.099	3
42	Tnfsf11	99	IPSSHNLMK	Oxidation(M)@8		1041.44	521.729	1041.53	521.771	2
42	Tnfsf11	99	IPSSHNLMK			1025.45	513.735	1025.53	513.774	2
42	Tnfsf11	99	ISEDSTHCFYR	Propionamide(C)@8		1427.55	714.78	1427.61	714.814	2
42	Tnfsf11	99	ISNMTLSNGK			1063.44	532.728	1063.53	532.774	2
42	Tnfsf11	99	ISNMTLSNGK	Oxidation(M)@4; Deamidated(N)@8		1080.44	541.229	1080.51	541.263	2
42	Tnfsf11	99	ISNMTLSNGKLR	Oxidation(M)@4; Deamidated(N)@8	missed K-L@10	1349.61	675.812	1349.7	675.856	2
42	Tnfsf11	76.78	LHENADLQDSTLEGEDTLPDSCR	Propionamide(C)@22		2629.08	877.368	2628.16	877.061	3
42	Tnfsf11	93.19	LHENADLQDSTLEGEDTLPDSCRR	Propionamide(C)@22	missed R-R@23	2784.06	697.021	2784.26	697.073	4
42	Tnfsf11	92.17	LHENADLQDSTLEGEDTLPDSCRR	Propionamide(C)@22	missed R-R@23	2784.18	929.068	2784.26	929.095	3
42	Tnfsf11	99	MKQAFQGAVQK		missed K-Q@2	1234.57	618.294	1234.65	618.332	2
42	Tnfsf11	99	MKQAFQGAVQK	Oxidation(M)@1	missed K-Q@2	1250.57	626.294	1250.64	626.329	2
42	Tnfsf11	99	MKQAFQGAVQK		missed K-Q@2	1234.58	412.535	1234.65	412.557	3
42	Tnfsf11	89.37	MKQAFQGAVQK	Oxidation(M)@1	missed K-Q@2	1250.51	417.844	1250.64	417.889	3
42	Tnfsf11	99	QAFQGAVQK	Gln->pyro-Glu@N-term		958.398	480.207	958.487	480.251	2
42	Tnfsf11	99	QAFQGAVQK			975.43	488.722	975.514	488.764	2
42	Tnfsf11	98.35	TSIKIPSSHNLMK	Oxidation(M)@12	missed K-I@4	1470.71	491.244	1470.79	491.269	3
42	Tnfsf11	93.94	TSIKIPSSHNLMK		missed K-I@4	1454.69	485.905	1454.79	485.938	3
42	Tnfsf11	99	VTLSSWYHDR			1262.53	632.271	1262.6	632.309	2
43	Tnfsf8	99	APLKGGNCSEDLFCTLK	Propionamide(C)@8; Propionamide(C)@14	missed K-G@4	1936.93	969.472	1936.94	969.477	2
43	Tnfsf8	92.49	APLKGGNCSEDLFCTLK	Deamidated(N)@7; Propionamide(C)@8; Propionamide(C)@14	missed K-G@4	1936.94	646.654	1937.92	646.982	3
43	Tnfsf8	67.71	APLKGGNCSEDLFCTLK	Propionamide(C)@8; Propionamide(C)@14	missed K-G@4	1936.97	646.664	1936.94	646.654	3
43	Tnfsf8	70.63	DSTPNTTEKAPLK		missed K-A@9	1400.72	701.366	1400.71	701.365	2
43	Tnfsf8	65.74	DSTPNTTEKAPLK		missed K-A@9	1400.66	467.894	1400.71	467.912	3
43	Tnfsf8	99	GGNCSEDLFCTLK	Propionamide(C)@4; Propionamide(C)@10		1527.67	764.843	1527.67	764.842	2
43	Tnfsf8	98.56	GGNCSEDLFCTLK	Deamidated(N)@3; Propionamide(C)@4; Propionamide(C)@10		1528.65	765.333	1528.65	765.334	2
43	Tnfsf8	78.82	GGNCSEDLFCTLK	Propionamide(C)@4; Propionamide(C)@10		1527.61	510.21	1527.67	510.231	3
43	Tnfsf8	99	KQTLVTVCESGVQSK	Propionamide(C)@8	missed K-Q@1	1676.89	839.45	1676.88	839.446	2
43	Tnfsf8	91.21	MEPGLQQAGSCGAPSPDPAMQVQPGSVASPWR	Oxidation(M)@1; Propionamide(C)@11		3322.51	831.636	3322.52	831.637	4
43	Tnfsf8	83.24	MEPGLQQAGSCGAPSPDPAMQVQPGSVASPWR	Propionamide(C)@11; Oxidation(M)@20		3322.48	831.628	3322.52	831.637	4
43	Tnfsf8	60.41	MEPGLQQAGSCGAPSPDPAMQVQPGSVASPWR	Oxidation(M)@1; Propionamide(C)@11; Oxidation(M)@20		3339.5	835.881	3338.51	835.635	4
43	Tnfsf8	99	QTLVTVCESGVQSK	Gln->pyro-Glu@N-term; Propionamide(C)@7		1531.74	766.877	1531.76	766.885	2
43	Tnfsf8	99	QTLVTVCESGVQSK	Propionamide(C)@7		1548.78	775.396	1548.78	775.398	2
43	Tnfsf8	97.12	QTLVTVCESGVQSK	Propionamide(C)@7		1549.85	517.624	1548.78	517.268	3
43	Tnfsf8	99	SWAYLQVSK			1080.54	541.278	1080.56	541.287	2
44	Tnfsf9	99	AYLHGAQDAYR			1263.56	422.195	1263.6	422.207	3
44	Tnfsf9	94.43	DREAAWPPALNFCSR	Propionamide(C)@13	missed R-E@2	1802.83	601.949	1802.85	601.958	3
44	Tnfsf9	51.39	EAAWPPALNFCSR	Propionamide(C)@11		1531.74	766.875	1531.72	766.869	2
44	Tnfsf9	99	HPAGTSCPSDAALLR	Propionamide(C)@7		1565.69	522.904	1565.76	522.928	3
44	Tnfsf9	99	HPAGTSCPSDAALLR	Propionamide(C)@7		1565.73	783.873	1565.76	783.888	2
44	Tnfsf9	99	MDQHTLDVEDTADAR			1715.73	858.873	1715.74	858.878	2
44	Tnfsf9	99	MDQHTLDVEDTADAR	Oxidation(M)@1		1731.72	578.248	1731.74	578.253	3
44	Tnfsf9	99	MDQHTLDVEDTADAR	Oxidation(M)@1		1731.72	866.87	1731.74	866.876	2
44	Tnfsf9	99	MDQHTLDVEDTADAR			1715.75	572.925	1715.74	572.921	3
44	Tnfsf9	98.78	MDQHTLDVEDTADARHPAGTSCPSDAALLR	Propionamide(C)@22	missed R-H@15	3263.57	816.9	3263.49	816.881	4
44	Tnfsf9	91.51	MDQHTLDVEDTADARHPAGTSCPSDAALLR	Oxidation(M)@1; Propionamide(C)@22	missed R-H@15	3279.6	820.909	3279.49	820.879	4
44	Tnfsf9	99	SWSQLLLLK			1086.62	544.318	1086.64	544.329	2
44	Tnfsf9	69.15	TEPRPALTITTSPNLGTR	Deamidated(N)@14		1924.99	642.672	1925.02	642.681	3
44	Tnfsf9	56.97	TEPRPALTITTSPNLGTR			1924.04	642.353	1924.04	642.353	3
45	Glra2	94.56	ATPANPLPQPPK			1229.66	615.835	1229.68	615.846	2
45	Glra2	81.92	ATPANPLPQPPKDADAIK			1842.96	922.488	1842.98	922.499	2
45	Glra2	95.57	EAFCKDHDSR	Propionamide(C)@4		1277.54	639.776	1277.55	639.78	2
45	Glra2	59.96	EEKELGYCTK	Propionamide(C)@8		1269.59	635.803	1269.59	635.803	2
45	Glra2	99	FNFSGYGMGHCLQMK	Propionamide(C)@11		1789.81	895.913	1789.77	895.894	2
45	Glra2	99	FNFSGYGMGHCLQMK	Propionamide(C)@11		1789.77	597.597	1789.77	597.599	3
45	Glra2	99	FNFSGYGMGHCLQMK	Oxidation(M)@8; Propionamide(C)@11		1805.75	602.923	1805.77	602.93	3
45	Glra2	87.03	FNFSGYGMGHCLQMK	Oxidation(M)@8; Propionamide(C)@11		1805.75	903.884	1805.77	903.892	2
45	Glra2	86.3	FTCIEVK	Propionamide(C)@3		909.386	455.7	909.463	455.739	2
45	Glra2	99	GANFHDVTTDNK			1317.6	659.807	1317.59	659.805	2
45	Glra2	99	GANFHDVTTDNK			1317.59	440.203	1317.59	440.206	3
45	Glra2	96.55	GANFHDVTTDNK	Deamidated(N)@3		1318.6	660.309	1318.58	660.297	2
45	Glra2	99	GANFHDVTTDNKLLR		missed K-L@12	1699.9	567.642	1699.86	567.629	3
45	Glra2	99	HPSQTLSPSDFLDK			1570.77	786.393	1570.76	786.389	2
45	Glra2	91.83	HPSQTLSPSDFLDK			1570.69	524.572	1570.76	524.595	3
45	Glra2	99	HPSQTLSPSDFLDKLMGR		missed K-L@14	2028	677.009	2028.01	677.011	3
45	Glra2	94.71	HPSQTLSPSDFLDKLMGR	Oxidation(M)@16	missed K-L@14	2043.95	682.325	2044	682.342	3
45	Glra2	98.21	LTLTLSCPMDLK	Propionamide(C)@7; Oxidation(M)@9		1420.71	711.363	1420.73	711.373	2
45	Glra2	80.48	QHKEFLR			956.513	479.264	956.519	479.267	2
45	Glra2	99	QNKEEDVTR	Gln->pyro-Glu@N-term		1100.5	551.259	1100.51	551.262	2
45	Glra2	99	QNKEEDVTR			1117.53	559.771	1117.54	559.775	2
45	Glra2	99	RQNKEEDVTR		missed R-Q@1	1273.65	425.558	1273.64	425.553	3
45	Glra2	98.39	RQNKEEDVTR		missed R-Q@1	1273.66	637.839	1273.64	637.826	2
45	Glra2	56.48	SGKHPSQTLSPSDFLDK		missed K-H@3	1842.9	922.457	1842.91	922.463	2
45	Glra2	99	VALGITTVLTMTTQSSGSR			1922.02	641.682	1922.01	641.679	3
45	Glra2	99	VALGITTVLTMTTQSSGSR	Oxidation(M)@11		1938	970.006	1938.01	970.012	2
45	Glra2	81.16	VALGITTVLTMTTQSSGSR	Oxidation(M)@11		1937.93	646.985	1938.01	647.01	3
46	Glra4	99	DEKDLGYCTK	Propionamide(C)@8		1241.37	414.798	1241.56	414.861	3
46	Glra4	86.3	FTCIEVK	Propionamide(C)@3		909.386	455.7	909.463	455.739	2
46	Glra4	99	GANFHEVTTDNK			1331.53	666.774	1331.61	666.813	2
46	Glra4	99	GANFHEVTTDNK	Deamidated(N)@3		1332.51	667.264	1332.59	667.305	2
46	Glra4	97.76	GANFHEVTTDNK			1331.49	444.837	1331.61	444.877	3
46	Glra4	93.73	GANFHEVTTDNKLLR	Deamidated(N)@11	missed K-L@12	1713.79	572.269	1714.86	572.629	3
46	Glra4	98.96	GSQPMSPSDFLDK	Oxidation(M)@5		1423.55	712.782	1423.63	712.822	2
46	Glra4	74.81	GSQPMSPSDFLDKLMGR		missed K-L@13	1864.83	933.423	1864.88	933.448	2
46	Glra4	64.6	GSQPMSPSDFLDKLMGR	Oxidation(M)@5; Oxidation(M)@15	missed K-L@13	1896.79	949.404	1896.87	949.443	2
46	Glra4	99	IFKNGNVLYSIR	Deamidated(N)@4	missed K-N@3	1423.69	712.854	1423.78	712.898	2
46	Glra4	87.57	IFKNGNVLYSIR	Deamidated(N)@4	missed K-N@3	1423.61	475.545	1423.78	475.601	3
46	Glra4	99	LTLILSCPMDLK	Propionamide(C)@7		1416.67	709.341	1416.77	709.393	2
46	Glra4	96.16	LTLILSCPMDLK	Propionamide(C)@7; Oxidation(M)@9		1432.7	717.357	1432.77	717.391	2
46	Glra4	99	NGNVLYSIR			1034.46	518.239	1034.55	518.283	2
46	Glra4	99	NGNVLYSIR	Deamidated(N)@1		1035.45	518.731	1035.53	518.775	2
46	Glra4	99	NGNVLYSIR	Deamidated(N)@3		1035.41	518.713	1035.53	518.775	2
46	Glra4	98.73	QQWNDPR	Gln->pyro-Glu@N-term		925.445	463.73	925.404	463.709	2
46	Glra4	97.58	QQWNDPR			942.307	472.161	942.431	472.223	2
46	Glra4	99	VGLGITTVLTMTTQSSGSR			1907.95	954.982	1908	955.007	2
46	Glra4	99	VGLGITTVLTMTTQSSGSR	Oxidation(M)@11		1923.96	962.989	1923.99	963.004	2
46	Glra4	99	VGLGITTVLTMTTQSSGSR	Oxidation(M)@11		1923.89	642.305	1923.99	642.338	3
46	Glra4	98.38	VGLGITTVLTMTTQSSGSR			1907.85	636.957	1908	637.007	3
46	Glra4	98.69	VLLSVALAK			912.496	457.255	912.601	457.308	2
46	Glra4	99	VLLSVALAKEDVK			1383.74	692.875	1383.83	692.924	2
46	Glra4	98.6	VLLSVALAKEDVK			1384.65	462.558	1383.83	462.285	3
47	Glrb	56.46	DFELSNYDCYGKPIEVNNGLGKPQAK	Propionamide(C)@9; Deamidated(N)@18		2969.39	743.354	2970.41	743.609	4
47	Glrb	99	DGDVLVSMR			990.479	496.247	990.48	496.247	2
47	Glrb	99	DGDVLVSMR	Oxidation(M)@8		1006.51	504.26	1006.48	504.245	2
47	Glrb	99	EDIEYGNCTK	Propionamide(C)@8		1241.51	621.764	1241.52	621.769	2
47	Glrb	99	FIWQSGDPVQLEK			1546.75	774.382	1545.78	773.899	2
47	Glrb	99	GSDALTVDPTMYK	Oxidation(M)@11		1412.63	707.325	1412.65	707.332	2
47	Glrb	99	GSDALTVDPTMYK			1396.63	699.324	1396.65	699.334	2
47	Glrb	99	IALPQFDIK			1043.58	522.795	1043.6	522.808	2
47	Glrb	99	KEDIEYGNCTK	Propionamide(C)@9		1369.63	685.82	1369.62	685.816	2
47	Glrb	99	KEDIEYGNCTK	Propionamide(C)@9		1369.63	457.55	1369.62	457.547	3
47	Glrb	99	KNTVNGTGTPVHISTLQVGETR		missed K-N@1	2308.2	578.057	2308.21	578.061	4
47	Glrb	99	KNTVNGTGTPVHISTLQVGETR	Deamidated(N)@5	missed K-N@1	2310.23	578.564	2309.2	578.307	4
47	Glrb	99	KNTVNGTGTPVHISTLQVGETR		missed K-N@1	2308.27	770.431	2308.21	770.412	3
47	Glrb	98.04	KNTVNGTGTPVHISTLQVGETR	Deamidated(N)@5	missed K-N@1	2309.27	770.765	2309.2	770.74	3
47	Glrb	99	KPPPAKPVIPTAAK			1413.89	472.304	1413.87	472.298	3
47	Glrb	74.5	KPPPAKPVIPTAAK			1413.87	707.941	1413.87	707.943	2
47	Glrb	99	LLVSYDPR			961.505	481.76	961.523	481.769	2
47	Glrb	99	MQLESFGYTTDDLR			1674.74	838.379	1674.76	838.385	2
47	Glrb	99	MQLESFGYTTDDLR	Oxidation(M)@1		1690.75	846.382	1690.75	846.383	2
47	Glrb	99	MQLESFGYTTDDLR	Oxidation(M)@1		1690.7	564.573	1690.75	564.591	3
47	Glrb	99	NKKPPPAKPVIPTAAK		missed K-K@2	1656.04	553.02	1656.01	553.01	3
47	Glrb	68.23	NTVNGTGTPVHISTLQVGETR			2181.1	728.041	2180.12	727.713	3
47	Glrb	98.73	QKWNDPR	Gln->pyro-Glu@N-term	missed K-W@2	925.445	463.73	925.441	463.728	2
47	Glrb	97.58	QKWNDPR		missed K-W@2	942.307	472.161	942.467	472.241	2
47	Glrb	99	QYLCPSQQSPEDLAR	Propionamide(C)@4		1804.82	602.612	1804.84	602.621	3
47	Glrb	97.8	QYLCPSQQSPEDLAR	Propionamide(C)@4		1804.84	903.429	1804.84	903.428	2
47	Glrb	61.25	QYLCPSQQSPEDLAR	Gln->pyro-Glu@N-term; Propionamide(C)@4		1787.79	894.904	1787.81	894.915	2
47	Glrb	98.78	RIDLYAR		missed R-I@1	905.517	453.766	905.508	453.761	2
47	Glrb	99	SNDFSIVGSLPR			1290.65	646.331	1290.66	646.336	2
47	Glrb	99	VPPNSTSNILNR			1310.67	656.344	1310.69	656.354	2
47	Glrb	98.63	VPPNSTSNILNR			1310.66	437.893	1310.69	437.905	3
48	Gabra1	99	AECPMHLEDFPMDAHACPLK	Propionamide(C)@3; Propionamide(C)@17		2396.06	799.692	2396.04	799.688	3
48	Gabra1	67.32	AECPMHLEDFPMDAHACPLK	Propionamide(C)@3; Oxidation(M)@12; Propionamide(C)@17		2412.77	805.263	2412.04	805.02	3
48	Gabra1	99	AEVVYEWTR			1151.51	576.764	1151.56	576.788	2
48	Gabra1	99	EVKPETKPPEPK			1377.7	689.857	1377.75	689.882	2
48	Gabra1	97.64	FGSYAYTR			963.459	482.737	963.445	482.73	2
48	Gabra1	99	FKGPMTVLR		missed K-G@2	1047.59	524.804	1047.59	524.802	2
48	Gabra1	99	GDPGLATIAK			941.491	471.753	941.518	471.766	2
48	Gabra1	99	ITEDGTLLYTMR			1411.69	706.851	1411.7	706.858	2
48	Gabra1	99	ITEDGTLLYTMR	Oxidation(M)@11		1427.67	714.844	1427.7	714.856	2
48	Gabra1	99	ITEDGTLLYTMR			1411.73	471.585	1411.7	471.575	3
48	Gabra1	97.52	ITEDGTLLYTMR	Oxidation(M)@11		1427.63	476.885	1427.7	476.906	3
48	Gabra1	92.02	IWTPDTFFHNGK			1461.72	731.87	1461.7	731.859	2
48	Gabra1	73.32	IWTPDTFFHNGK			1461.71	488.242	1461.7	488.242	3
48	Gabra1	63.21	IWTPDTFFHNGKK	Deamidated(N)@10	missed K-K@12	1590.66	531.228	1590.78	531.268	3
48	Gabra1	88.76	KNNTYAPTATSYTPNLAR		missed K-N@1	1981.96	661.661	1981.99	661.669	3
48	Gabra1	52.89	KNNTYAPTATSYTPNLAR	Deamidated(N)@3	missed K-N@1	1982.97	661.996	1982.97	661.997	3
48	Gabra1	83.76	KSVAHNMTMPNK		missed K-S@1	1356.55	453.19	1356.66	453.229	3
48	Gabra1	99	KTFNSVSK	Deamidated(N)@4	missed K-T@1	910.481	456.248	910.476	456.245	2
48	Gabra1	99	KTFNSVSK		missed K-T@1	909.486	455.75	909.492	455.753	2
48	Gabra1	99	LLDGYDNR			964.448	483.231	964.461	483.238	2
48	Gabra1	95.39	LLDGYDNR	Deamidated(N)@7		965.439	483.727	965.445	483.73	2
48	Gabra1	99	LNNLMASK	Oxidation(M)@5		905.45	453.732	905.464	453.739	2
48	Gabra1	99	LNNLMASK			889.473	445.744	889.469	445.742	2
48	Gabra1	87.99	LRPGLGER			896.521	449.268	896.519	449.267	2
48	Gabra1	99	NNTYAPTATSYTPNLAR			1853.86	618.96	1853.89	618.971	3
48	Gabra1	97.08	NNTYAPTATSYTPNLAR			1853.86	927.937	1853.89	927.953	2
48	Gabra1	94.96	NNTYAPTATSYTPNLAR	Deamidated(N)@2		1854.85	619.291	1854.87	619.299	3
48	Gabra1	94.74	NNTYAPTATSYTPNLAR	Deamidated(N)@2		1854.84	928.429	1854.87	928.445	2
48	Gabra1	90.96	QSWKDER	Gln->pyro-Glu@N-term		930.445	466.23	930.42	466.217	2
48	Gabra1	78.43	QSWKDER			947.356	474.685	947.446	474.73	2
48	Gabra1	61.57	SSTGEYVVMTTHFHLK	Oxidation(M)@9	cleaved Q-S@N-term	1851.93	618.317	1851.88	618.301	3
48	Gabra1	99	SVAHNMTMPNK			1228.56	615.285	1228.57	615.292	2
48	Gabra1	99	SVAHNMTMPNK	Oxidation(M)@6		1244.58	623.295	1244.56	623.289	2
48	Gabra1	99	SVAHNMTMPNK	Oxidation(M)@8		1244.59	623.304	1244.56	623.289	2
48	Gabra1	99	SVAHNMTMPNK			1228.84	410.621	1228.57	410.53	3
48	Gabra1	99	SVAHNMTMPNK	Oxidation(M)@6; Oxidation(M)@8		1260.62	421.214	1260.56	421.194	3
48	Gabra1	99	SVAHNMTMPNK	Oxidation(M)@6; Oxidation(M)@8		1260.54	631.279	1260.56	631.287	2
48	Gabra1	90.31	SVAHNMTMPNK	Oxidation(M)@6		1244.66	415.894	1244.56	415.862	3
48	Gabra1	90.99	SVVPEKPK			882.477	442.246	882.517	442.266	2
48	Gabra1	99	SVVVAEDGSR			1017.41	509.714	1017.51	509.762	2
48	Gabra1	70.75	SYGQPSQDELKDNTTVFTR	Deamidated(N)@13		2185.06	729.361	2186.01	729.678	3
48	Gabra1	70.45	SYGQPSQDELKDNTTVFTR			2185.08	729.366	2185.03	729.35	3
48	Gabra1	99	VKDPLIK			811.527	406.771	811.517	406.766	2
48	Gabra1	99	VKDPLIKK		missed K-K@7	939.615	470.815	939.612	470.813	2
49	Gabra2	99	DPVLSTISK			958.531	480.273	958.534	480.274	2
49	Gabra2	98.93	FKGPMNILR	Oxidation(M)@5	missed K-G@2	1090.61	546.31	1090.6	546.305	2
49	Gabra2	99	GPMNILR	Oxidation(M)@3		815.41	408.712	815.432	408.723	2
49	Gabra2	99	IQDDGTLLYTMR			1424.69	713.353	1424.7	713.356	2
49	Gabra2	99	IQDDGTLLYTMR	Oxidation(M)@11		1440.7	721.357	1440.69	721.353	2
49	Gabra2	92.02	IWTPDTFFHNGK			1461.72	731.87	1461.7	731.859	2
49	Gabra2	73.32	IWTPDTFFHNGK			1461.71	488.242	1461.7	488.242	3
49	Gabra2	63.21	IWTPDTFFHNGKK	Deamidated(N)@10	missed K-K@12	1590.66	531.228	1590.78	531.268	3
49	Gabra2	99	KPENKPAEAK			1110.58	556.299	1110.6	556.309	2
49	Gabra2	83.76	KSVAHNMTMPNK		missed K-S@1	1356.55	453.19	1356.66	453.229	3
49	Gabra2	99	KTFNSVSK	Deamidated(N)@4	missed K-T@1	910.481	456.248	910.476	456.245	2
49	Gabra2	99	KTFNSVSK		missed K-T@1	909.486	455.75	909.492	455.753	2
49	Gabra2	99	LLDGYDNR			964.448	483.231	964.461	483.238	2
49	Gabra2	95.39	LLDGYDNR	Deamidated(N)@7		965.439	483.727	965.445	483.73	2
49	Gabra2	99	LNNLMASK	Oxidation(M)@5		905.45	453.732	905.464	453.739	2
49	Gabra2	99	LNNLMASK			889.473	445.744	889.469	445.742	2
49	Gabra2	99	LNQYDLLGQSIGK			1447.76	724.89	1447.77	724.891	2
49	Gabra2	99	LNQYDLLGQSIGK	Deamidated(N)@2		1448.76	725.385	1448.75	725.383	2
49	Gabra2	97.84	LNQYDLLGQSIGK			1447.72	483.579	1447.77	483.596	3
49	Gabra2	99	LVLANIQEDEAK	Deamidated(N)@5		1342.68	672.347	1342.7	672.356	2
49	Gabra2	99	LVLANIQEDEAK			1341.68	671.848	1341.71	671.864	2
49	Gabra2	99	LVLANIQEDEAK			1341.65	448.225	1341.71	448.245	3
49	Gabra2	99	NNITIFTR	Deamidated(N)@2		978.496	490.255	978.513	490.264	2
49	Gabra2	98.85	NNITIFTR			977.52	489.767	977.529	489.772	2
49	Gabra2	83.71	RGWAWDGK		missed R-G@1	974.394	488.204	974.472	488.243	2
49	Gabra2	98.7	SATTPEPNK			943.493	472.754	943.461	472.738	2
49	Gabra2	98.23	SATTPEPNKKPENKPAEAKK	Deamidated(N)@8	missed K-K@9; missed K-K@19	2164.18	722.4	2165.13	722.718	3
49	Gabra2	79.44	SSTGEYTVMTAHFHLK	Oxidation(M)@9		1823.85	912.933	1823.85	912.933	2
49	Gabra2	78.72	SSTGEYTVMTAHFHLK	Oxidation(M)@9		1823.84	608.954	1823.85	608.958	3
49	Gabra2	99	SVAHNMTMPNK	Oxidation(M)@6		1244.58	623.295	1244.56	623.289	2
49	Gabra2	99	SVAHNMTMPNK			1228.56	615.285	1228.57	615.292	2
49	Gabra2	99	SVAHNMTMPNK	Oxidation(M)@8		1244.59	623.304	1244.56	623.289	2
49	Gabra2	99	SVAHNMTMPNK			1228.84	410.621	1228.57	410.53	3
49	Gabra2	99	SVAHNMTMPNK	Oxidation(M)@6; Oxidation(M)@8		1260.62	421.214	1260.56	421.194	3
49	Gabra2	99	SVAHNMTMPNK	Oxidation(M)@6; Oxidation(M)@8		1260.54	631.279	1260.56	631.287	2
49	Gabra2	90.31	SVAHNMTMPNK	Oxidation(M)@6		1244.66	415.894	1244.56	415.862	3
50	Gabra3	99	ATYVQDSPAETK			1308.62	655.316	1308.62	655.317	2
50	Gabra3	96.4	DTEFSTISK			1026.48	514.247	1026.49	514.251	2
50	Gabra3	62.49	FGSYAYTK			935.436	468.725	935.439	468.727	2
50	Gabra3	99	HAPDIPDDSTDNITIFTR			2026.93	676.651	2026.96	676.66	3
50	Gabra3	99	HAPDIPDDSTDNITIFTR	Deamidated(N)@12		2028.92	677.313	2027.94	676.988	3
50	Gabra3	99	ILPLNNLLASK			1194.71	598.364	1194.73	598.374	2
50	Gabra3	92.02	IWTPDTFFHNGK			1461.72	731.87	1461.7	731.859	2
50	Gabra3	73.32	IWTPDTFFHNGK			1461.71	488.242	1461.7	488.242	3
50	Gabra3	63.21	IWTPDTFFHNGKK	Deamidated(N)@10	missed K-K@12	1590.66	531.228	1590.78	531.268	3
50	Gabra3	99	KKTPAAPTK		missed K-K@1; missed K-T@2	940.576	471.295	940.571	471.293	2
50	Gabra3	78.25	KSVAHNMTTPNK	Oxidation(M)@7	missed K-S@1	1342.68	448.568	1342.67	448.563	3
50	Gabra3	99	KTPAAPTKK		missed K-T@1; missed K-K@8	940.56	471.287	940.571	471.293	2
50	Gabra3	99	KVPEALEMK	Oxidation(M)@8	missed K-V@1	1059.57	530.791	1059.56	530.789	2
50	Gabra3	68.95	LKFDGPMK	Oxidation(M)@7	missed K-F@2	950.511	476.263	950.49	476.252	2
50	Gabra3	99	LLDGYDNR			964.448	483.231	964.461	483.238	2
50	Gabra3	95.39	LLDGYDNR	Deamidated(N)@7		965.439	483.727	965.445	483.73	2
50	Gabra3	99	LPLNNLLASK		cleaved I-L@N-term	1081.55	541.78	1081.65	541.832	2
50	Gabra3	99	LPLNNLLASK	Deamidated(N)@4	cleaved I-L@N-term	1082.51	542.263	1082.63	542.324	2
50	Gabra3	99	LPLNNLLASK	Deamidated(N)@5	cleaved I-L@N-term	1082.53	542.27	1082.63	542.324	2
50	Gabra3	99	LRPGLGDAVTEVK			1353.79	452.271	1353.76	452.261	3
50	Gabra3	95.26	LRPGLGDAVTEVK			1353.77	677.893	1353.76	677.888	2
50	Gabra3	99	LVDNGTLLYTMR	Oxidation(M)@11		1410.71	706.361	1410.72	706.366	2
50	Gabra3	99	LVDNGTLLYTMR	Deamidated(N)@4; Oxidation(M)@11		1411.68	706.848	1411.7	706.858	2
50	Gabra3	95.2	LVDNGTLLYTMR	Oxidation(M)@11		1410.68	471.233	1410.72	471.247	3
50	Gabra3	99	NTTFNIVGTTYPINLAK			1865.99	934.004	1865.99	934.002	2
50	Gabra3	99	QDIGGLSPK	Gln->pyro-Glu@N-term		896.423	449.219	896.46	449.237	2
50	Gabra3	99	QDIGGLSPK			913.471	457.743	913.487	457.751	2
50	Gabra3	95.24	QTWHDER			970.423	486.219	970.426	486.22	2
50	Gabra3	68.22	QTWHDER	Gln->pyro-Glu@N-term		953.409	477.712	953.399	477.707	2
50	Gabra3	99	RQEPGDFVK		missed R-Q@1	1074.54	538.28	1074.55	538.28	2
50	Gabra3	99	SAAAPSASSTPTAIASPK			1613.78	538.936	1613.83	538.949	3
50	Gabra3	99	SAAAPSASSTPTAIASPK			1613.83	807.922	1613.83	807.92	2
50	Gabra3	61.57	SSTGEYVVMTTHFHLK	Oxidation(M)@9		1851.93	618.317	1851.88	618.301	3
50	Gabra3	99	SVAHNMTTPNK	Oxidation(M)@6		1214.58	608.296	1214.57	608.293	2
50	Gabra3	70	SVAHNMTTPNK	Oxidation(M)@6		1215.55	406.19	1214.57	405.864	3
50	Gabra3	99	SVEVAQDGSR			1046.48	524.246	1046.5	524.257	2
50	Gabra3	99	TPAAPTKK		missed K-K@7	812.454	407.234	812.476	407.245	2
50	Gabra3	95.74	VPEALEMK	Oxidation(M)@7		931.456	466.735	931.468	466.742	2
50	Gabra3	99	VPEALEMKK	Oxidation(M)@7	missed K-K@8	1059.56	530.789	1059.56	530.789	2
51	Gabra4	99	AHLASSPNPFSR			1282.55	642.284	1282.64	642.328	2
51	Gabra4	99	AHLASSPNPFSR			1282.48	428.502	1282.64	428.555	3
51	Gabra4	99	AHLASSPNPFSR	Deamidated(N)@8		1283.53	642.773	1283.63	642.82	2
51	Gabra4	99	ANAAETMSAAAR			1162.43	582.221	1162.54	582.277	2
51	Gabra4	99	ANAAETMSAAAR	Oxidation(M)@7		1178.41	590.214	1178.54	590.275	2
51	Gabra4	85.63	ANAAETMSAAAR	Deamidated(N)@2; Oxidation(M)@7		1179.45	590.732	1179.52	590.767	2
51	Gabra4	99	DEKLCPENFTR	Propionamide(C)@5	missed K-L@3	1421.57	711.795	1421.66	711.838	2
51	Gabra4	99	EKHTETSLQNTHANLNMR		missed K-H@2	2122.92	708.646	2123.02	708.68	3
51	Gabra4	94.81	EKHTETSLQNTHANLNMR		missed K-H@2	2122.9	531.732	2123.02	531.762	4
51	Gabra4	88.19	EKHTETSLQNTHANLNMR	Deamidated(N)@10; Oxidation(M)@17	missed K-H@2	2138.93	713.984	2140	714.34	3
51	Gabra4	99	FGSYAYPK			931.359	466.687	931.444	466.729	2
51	Gabra4	99	HTETSLQNTHANLNMR			1865.75	622.924	1865.88	622.967	3
51	Gabra4	99	HTETSLQNTHANLNMR	Deamidated(N)@8		1865.77	933.893	1866.86	934.439	2
51	Gabra4	99	HTETSLQNTHANLNMR	Oxidation(M)@15		1881.79	941.904	1881.88	941.945	2
51	Gabra4	99	HTETSLQNTHANLNMR	Oxidation(M)@15		1881.79	628.27	1881.88	628.299	3
51	Gabra4	99	HTETSLQNTHANLNMR			1865.87	467.475	1865.88	467.477	4
51	Gabra4	99	ILDSLLDGYDNR	Deamidated(N)@11		1393.57	697.792	1393.67	697.844	2
51	Gabra4	99	ILDSLLDGYDNR			1392.59	697.301	1392.69	697.352	2
51	Gabra4	99	ISKPPPEVPAAPVLK			1541.76	514.928	1541.92	514.98	3
51	Gabra4	88.77	ISKPPPEVPAAPVLK			1541.83	771.921	1541.92	771.966	2
51	Gabra4	97.97	KISKPPPEVPAAPVLK		missed K-I@1	1669.87	557.631	1670.01	557.678	3
51	Gabra4	91.18	LCPENFTR	Propionamide(C)@2		1049.4	525.706	1049.5	525.755	2
51	Gabra4	99	LKYDGPIEILR		missed K-Y@2	1315.65	658.834	1315.75	658.882	2
51	Gabra4	99	LKYDGPIEILR		missed K-Y@2	1315.6	439.539	1315.75	439.591	3
51	Gabra4	99	LLDGYDNR		cleaved S-L@N-term	964.448	483.231	964.461	483.238	2
51	Gabra4	95.39	LLDGYDNR	Deamidated(N)@7	cleaved S-L@N-term	965.439	483.727	965.445	483.73	2
51	Gabra4	99	LNNMMVTK	Oxidation(M)@5		965.39	483.702	965.467	483.741	2
51	Gabra4	99	LNNMMVTK	Oxidation(M)@4		965.372	483.693	965.467	483.741	2
51	Gabra4	93.86	LNNMMVTK			949.375	475.695	949.473	475.744	2
51	Gabra4	62.88	LNNMMVTK	Oxidation(M)@4; Oxidation(M)@5		981.377	491.696	981.462	491.738	2
51	Gabra4	99	LRPGFGGPVTEVK			1355.62	452.88	1355.76	452.926	3
51	Gabra4	96.8	LTISAECPMR	Propionamide(C)@7; Oxidation(M)@9		1206.48	604.248	1206.57	604.294	2
51	Gabra4	99	LVDFPMDGHACPLK	Propionamide(C)@11		1612.69	807.351	1612.77	807.394	2
51	Gabra4	99	LVDFPMDGHACPLK	Oxidation(M)@6; Propionamide(C)@11		1627.7	543.574	1628.77	543.93	3
51	Gabra4	91.29	LVDFPMDGHACPLK	Oxidation(M)@6; Propionamide(C)@11		1628.66	815.336	1628.77	815.392	2
51	Gabra4	61.99	LVDFPMDGHACPLK	Propionamide(C)@11		1611.75	538.258	1612.77	538.599	3
51	Gabra4	99	NGTILYTMR			1067.43	534.721	1067.54	534.779	2
51	Gabra4	99	NGTILYTMR	Deamidated(N)@1		1068.42	535.218	1068.53	535.271	2
51	Gabra4	95.66	QTWIDKR	Gln->pyro-Glu@N-term	missed K-R@6	928.384	465.199	928.477	465.246	2
51	Gabra4	63.8	QTWIDKR		missed K-R@6	945.508	473.761	945.503	473.759	2
51	Gabra4	99	RTNALVHSESDVK		missed R-T@1	1454.65	728.332	1454.75	728.381	2
51	Gabra4	99	SEMIYTWTK	Oxidation(M)@3		1173.44	587.726	1173.54	587.776	2
51	Gabra4	99	SEMIYTWTK			1157.44	579.727	1157.54	579.779	2
51	Gabra4	99	SEMIYTWTKGPEK	Oxidation(M)@3	missed K-G@9	1584.69	793.354	1584.75	793.382	2
51	Gabra4	99	SEMIYTWTKGPEK		missed K-G@9	1567.68	784.846	1568.75	785.385	2
51	Gabra4	57.49	SEMIYTWTKGPEK	Oxidation(M)@3	missed K-G@9	1584.75	529.258	1584.75	529.257	3
51	Gabra4	99	SRTEVGNHSSK		missed R-T@2	1200.5	601.258	1200.58	601.3	2
51	Gabra4	99	SRTEVGNHSSK		missed R-T@2	1200.51	401.178	1200.58	401.202	3
51	Gabra4	99	SVEVPKESSSLVQYDLIGQTVSSETIK			2922.32	975.115	2922.51	975.176	3
51	Gabra4	99	SVSHNMTAPNK			1184.46	593.235	1184.56	593.288	2
51	Gabra4	99	SVSHNMTAPNK	Oxidation(M)@6		1200.45	601.233	1200.56	601.285	2
51	Gabra4	98.72	SVSHNMTAPNK	Oxidation(M)@6		1200.58	401.201	1200.56	401.193	3
51	Gabra4	67.92	SVSHNMTAPNK	Deamidated(N)@5		1185.43	593.722	1185.54	593.78	2
51	Gabra4	99	SVSHNMTAPNKLFR		missed K-L@11	1600.73	801.372	1600.81	801.414	2
51	Gabra4	98.68	SVSHNMTAPNKLFR	Deamidated(N)@5	missed K-L@11	1601.73	534.917	1601.8	534.94	3
51	Gabra4	97.42	SVSHNMTAPNKLFR	Oxidation(M)@6	missed K-L@11	1616.69	539.904	1616.81	539.944	3
51	Gabra4	97.08	SVSHNMTAPNKLFR		missed K-L@11	1600.71	534.578	1600.81	534.612	3
51	Gabra4	99	TNALVHSESDVK			1298.53	650.271	1298.65	650.331	2
51	Gabra4	94.69	TNALVHSESDVK	Deamidated(N)@2		1299.53	650.774	1299.63	650.823	2
51	Gabra4	62.94	TNALVHSESDVK	Deamidated(N)@2		1299.64	434.22	1299.63	434.217	3
51	Gabra4	76.33	TNALVHSESDVKSR		missed K-S@12	1541.69	514.905	1541.78	514.934	3
51	Gabra4	99	TSAVQESSEATPK			1333.51	667.763	1333.64	667.825	2
51	Gabra4	57.86	TTVNTTGAAGNVSATPPPPAPPPSGSGTSK			2718.19	907.071	2718.35	907.123	3
51	Gabra4	99	YDGPIEILR			1074.47	538.245	1074.57	538.293	2
52	Gabra5	99	ASEEKTAESKK		missed K-T@5; missed K-K@10	1206.49	604.254	1206.61	604.312	2
52	Gabra5	99	EQPPAGTANAPTVSIK			1579.68	790.848	1579.82	790.918	2
52	Gabra5	99	EQPPAGTANAPTVSIK			1579.71	527.578	1579.82	527.614	3
52	Gabra5	92.04	FKGPMQR		missed K-G@2	862.489	432.252	862.448	432.231	2
52	Gabra5	99	ILDGLLDGYDNR			1362.55	682.283	1362.68	682.346	2
52	Gabra5	92.02	IWTPDTFFHNGK			1461.72	731.87	1461.7	731.859	2
52	Gabra5	73.32	IWTPDTFFHNGK			1461.71	488.242	1461.7	488.242	3
52	Gabra5	63.21	IWTPDTFFHNGKK	Deamidated(N)@10	missed K-K@12	1590.66	531.228	1590.78	531.268	3
52	Gabra5	99	KSIAHNMTTPNK	Oxidation(M)@7	missed K-S@1	1356.59	679.302	1356.68	679.348	2
52	Gabra5	81.79	KTYNSISK	Deamidated(N)@4	missed K-T@1	940.43	471.222	940.487	471.251	2
52	Gabra5	99	LEDDGTLLYTMR	Oxidation(M)@11		1441.67	721.845	1441.68	721.845	2
52	Gabra5	99	LEDDGTLLYTMR			1425.56	713.789	1425.68	713.848	2
52	Gabra5	99	LEDDGTLLYTMR			1425.55	476.191	1425.68	476.234	3
52	Gabra5	92.12	LEDDGTLLYTMR	Oxidation(M)@11		1441.47	481.498	1441.68	481.566	3
52	Gabra5	99	LLDGYDNR		cleaved G-L@N-term	964.448	483.231	964.461	483.238	2
52	Gabra5	95.39	LLDGYDNR	Deamidated(N)@7	cleaved G-L@N-term	965.439	483.727	965.445	483.73	2
52	Gabra5	99	LPLNNLLASK	Deamidated(N)@4		1082.51	542.263	1082.63	542.324	2
52	Gabra5	99	LPLNNLLASK			1081.55	541.784	1081.65	541.832	2
52	Gabra5	99	LPLNNLLASK	Deamidated(N)@5		1082.53	542.27	1082.63	542.324	2
52	Gabra5	87.99	LRPGLGER			896.521	449.268	896.519	449.267	2
52	Gabra5	99	LTHPPNIPK			1015.5	508.757	1015.58	508.798	2
52	Gabra5	99	LTHPPNIPKEQPPAGTANAPTVSIK			2577.28	860.101	2577.39	860.138	3
52	Gabra5	99	MDNGMLSR	Oxidation(M)@1		938.323	470.169	938.395	470.205	2
52	Gabra5	99	MDNGMLSR			922.347	462.181	922.4	462.207	2
52	Gabra5	99	MDNGMLSR	Oxidation(M)@1; Oxidation(M)@5		954.292	478.153	954.39	478.202	2
52	Gabra5	98.02	MDNGMLSR	Oxidation(M)@5		938.307	470.161	938.395	470.205	2
52	Gabra5	90.96	QSWKDER	Gln->pyro-Glu@N-term		930.445	466.23	930.42	466.217	2
52	Gabra5	78.43	QSWKDER			947.356	474.685	947.446	474.73	2
52	Gabra5	83.71	RGWAWDGK		missed R-G@1	974.394	488.204	974.472	488.243	2
52	Gabra5	99	SIAHNMTTPNK			1212.56	607.288	1212.59	607.303	2
52	Gabra5	99	SIAHNMTTPNK	Oxidation(M)@6		1228.51	615.261	1228.59	615.301	2
52	Gabra5	99	SIAHNMTTPNK			1212.53	405.185	1212.59	405.205	3
52	Gabra5	99	SIAHNMTTPNK	Deamidated(N)@5		1213.48	607.749	1213.58	607.795	2
52	Gabra5	88.46	SIAHNMTTPNK	Oxidation(M)@6		1228.53	410.518	1228.59	410.536	3
52	Gabra5	99	STNAFTTGK			925.381	463.698	925.451	463.733	2
52	Gabra5	99	SVVVAEDGSR			1017.43	509.724	1017.51	509.762	2
52	Gabra5	99	TYNSISK			811.302	406.658	811.408	406.711	2
53	Gabra6	99	DTMEVSSTVE			1096.36	549.186	1096.46	549.237	2
53	Gabra6	99	DTMEVSSTVE	Oxidation(M)@3		1112.37	557.19	1112.45	557.234	2
53	Gabra6	99	FGSYAYPK			931.359	466.687	931.444	466.729	2
53	Gabra6	99	GPAEILSLNNLMVSK			1584.82	793.416	1584.85	793.435	2
53	Gabra6	99	GPAEILSLNNLMVSK	Oxidation(M)@12		1600.81	801.412	1600.85	801.432	2
53	Gabra6	99	ILDNLLEGYDNR			1433.67	717.843	1433.72	717.865	2
53	Gabra6	99	ILDNLLEGYDNR			1433.6	478.875	1433.72	478.912	3
53	Gabra6	99	ILDNLLEGYDNR	Deamidated(N)@4		1434.67	718.34	1434.7	718.357	2
53	Gabra6	98.76	ILDNLLEGYDNR	Deamidated(N)@11		1434.67	718.345	1434.7	718.357	2
53	Gabra6	99	ISSLTLPIVPSSEASK			1627.77	543.599	1627.9	543.642	3
53	Gabra6	89.11	IWTPDTFFR			1181.51	591.763	1181.59	591.801	2
53	Gabra6	99	KSIAHNMTTPNK	Oxidation(M)@7	missed K-S@1	1356.59	679.302	1356.68	679.348	2
53	Gabra6	99	LMQNGTILYTMR	Deamidated(N)@4		1440.65	721.332	1440.71	721.363	2
53	Gabra6	99	LMQNGTILYTMR	Oxidation(M)@2		1455.69	728.851	1455.72	728.868	2
53	Gabra6	99	LMQNGTILYTMR	Oxidation(M)@2; Deamidated(N)@4		1456.68	729.348	1456.71	729.36	2
53	Gabra6	99	LMQNGTILYTMR			1439.67	720.841	1439.73	720.871	2
53	Gabra6	99	LMQNGTILYTMR	Deamidated(N)@4; Oxidation(M)@11		1456.64	729.327	1456.71	729.36	2
53	Gabra6	99	LRPGFGGAVTEVK			1329.65	444.223	1329.74	444.254	3
53	Gabra6	95.38	LRPGFGGAVTEVK			1329.69	665.852	1329.74	665.878	2
53	Gabra6	99	LVNFPMDGHACPLK	Propionamide(C)@11		1611.74	806.88	1611.79	806.902	2
53	Gabra6	99	LVNFPMDGHACPLK	Propionamide(C)@11		1611.76	538.26	1611.79	538.271	3
53	Gabra6	78.88	LVNFPMDGHACPLK	Oxidation(M)@6; Propionamide(C)@11		1627.75	814.884	1627.79	814.9	2
53	Gabra6	99	NGTILYTMR		cleaved Q-N@N-term	1067.43	534.721	1067.54	534.779	2
53	Gabra6	99	NGTILYTMR	Deamidated(N)@1	cleaved Q-N@N-term	1068.42	535.218	1068.53	535.271	2
53	Gabra6	99	QAQTAATPPVAK	Gln->pyro-Glu@N-term		1164.54	583.279	1164.61	583.314	2
53	Gabra6	99	QAQTAATPPVAK			1181.55	591.783	1181.64	591.828	2
53	Gabra6	99	SIAHNMTTPNK			1212.56	607.288	1212.59	607.303	2
53	Gabra6	99	SIAHNMTTPNK	Oxidation(M)@6		1228.51	615.261	1228.59	615.301	2
53	Gabra6	99	SIAHNMTTPNK			1212.53	405.185	1212.59	405.205	3
53	Gabra6	99	SIAHNMTTPNK	Deamidated(N)@5		1213.48	607.749	1213.58	607.795	2
53	Gabra6	88.46	SIAHNMTTPNK	Oxidation(M)@6		1228.53	410.518	1228.59	410.536	3
53	Gabra6	98.57	STPVSPPLLLPATGGTSK			1721.91	861.96	1721.96	861.985	2
53	Gabra6	84.81	STPVSPPLLLPATGGTSK			1721.85	574.956	1721.96	574.993	3
54	Gabrb2	99	GDDNAVTGVTK			1075.5	538.755	1075.51	538.765	2
54	Gabrb2	99	GDDNAVTGVTK	Deamidated(N)@4		1076.49	539.252	1076.5	539.257	2
54	Gabrb2	99	IELPQFSIVDYK			1450.76	726.385	1450.77	726.393	2
54	Gabrb2	99	IPDLTDVNAIDR		cleaved T-I@N-term	1340.68	671.35	1340.69	671.354	2
54	Gabrb2	99	IPDLTDVNAIDR	Deamidated(N)@8	cleaved T-I@N-term	1341.67	671.842	1341.68	671.846	2
54	Gabrb2	99	ITIPDLTDVNAIDR			1554.82	778.417	1554.83	778.42	2
54	Gabrb2	99	ITIPDLTDVNAIDR			1554.81	519.276	1554.83	519.282	3
54	Gabrb2	99	ITTTAACMMDLR	Propionamide(C)@7; Oxidation(M)@9		1412.64	707.328	1412.65	707.33	2
54	Gabrb2	99	ITTTAACMMDLR	Propionamide(C)@7		1396.65	699.334	1396.65	699.333	2
54	Gabrb2	96.13	ITTTAACMMDLR	Propionamide(C)@7; Oxidation(M)@8; Oxidation(M)@9		1428.62	715.319	1428.64	715.328	2
54	Gabrb2	99	KSFVHGVTVK		missed K-S@1	1100.62	551.317	1100.63	551.324	2
54	Gabrb2	99	KVVFSTGSYPR		missed K-V@1	1239.66	620.839	1239.66	620.838	2
54	Gabrb2	99	LHPDGTVLYGLR			1339.72	670.866	1339.72	670.87	2
54	Gabrb2	99	LHPDGTVLYGLR			1339.71	447.578	1339.72	447.582	3
54	Gabrb2	99	LLKGYDIR		missed K-G@3	976.541	489.278	976.571	489.293	2
54	Gabrb2	99	LSYNVIPLNLTLDNR			1743.95	872.985	1743.95	872.983	2
54	Gabrb2	91.97	MRLDVNK		missed R-L@2	874.47	438.242	874.469	438.242	2
54	Gabrb2	99	NEMATSEAVMGLGDPR			1676.72	839.367	1676.75	839.382	2
54	Gabrb2	99	NEMATSEAVMGLGDPR	Oxidation(M)@10		1692.75	847.384	1692.74	847.38	2
54	Gabrb2	99	NEMATSEAVMGLGDPR			1676.73	559.918	1676.75	559.924	3
54	Gabrb2	99	NEMATSEAVMGLGDPR	Oxidation(M)@3; Oxidation(M)@10		1708.75	855.382	1708.74	855.377	2
54	Gabrb2	99	NEMATSEAVMGLGDPR	Oxidation(M)@3; Oxidation(M)@10		1709.74	570.922	1708.74	570.587	3
54	Gabrb2	99	SFVHGVTVK			972.54	487.277	972.539	487.277	2
54	Gabrb2	99	STMLAYDASSIQYR			1604.74	803.375	1604.75	803.383	2
54	Gabrb2	99	STMLAYDASSIQYR	Oxidation(M)@3		1620.75	811.384	1620.75	811.38	2
54	Gabrb2	99	STMLAYDASSIQYR	Oxidation(M)@3		1620.71	541.245	1620.75	541.256	3
54	Gabrb2	95.73	STMLAYDASSIQYR			1604.72	535.915	1604.75	535.924	3
54	Gabrb2	97.52	VVFSTGSYPR			1111.57	556.792	1111.57	556.79	2
55	Gabrb3	99	GSEPSSVNDPGNMSFVK			1750.77	876.394	1750.78	876.399	2
55	Gabrb3	98.68	GSEPSSVNDPGNMSFVK	Oxidation(M)@13		1766.79	884.403	1766.78	884.396	2
55	Gabrb3	99	IELPQFSIVEHR			1466.79	734.4	1466.79	734.401	2
55	Gabrb3	99	IELPQFSIVEHR			1466.82	489.949	1466.79	489.937	3
55	Gabrb3	99	IKIPDLTDVNAIDR		missed K-I@2	1581.87	791.943	1581.87	791.944	2
55	Gabrb3	99	IKIPDLTDVNAIDR		missed K-I@2	1581.97	528.33	1581.87	528.298	3
55	Gabrb3	99	IPDLTDVNAIDR			1340.68	671.35	1340.69	671.354	2
55	Gabrb3	99	IPDLTDVNAIDR	Deamidated(N)@8		1341.67	671.842	1341.68	671.846	2
55	Gabrb3	99	ITTTAACMMDLR	Propionamide(C)@7; Oxidation(M)@9		1412.64	707.328	1412.65	707.33	2
55	Gabrb3	99	ITTTAACMMDLR	Propionamide(C)@7		1396.65	699.334	1396.65	699.333	2
55	Gabrb3	96.13	ITTTAACMMDLR	Propionamide(C)@7; Oxidation(M)@8; Oxidation(M)@9		1428.62	715.319	1428.64	715.328	2
55	Gabrb3	99	KSFVHGVTVK		missed K-S@1	1100.62	551.317	1100.63	551.324	2
55	Gabrb3	99	LAYSGIPLNLTLDNR			1658.9	830.459	1658.9	830.457	2
55	Gabrb3	99	LAYSGIPLNLTLDNR			1658.85	553.956	1658.9	553.974	3
55	Gabrb3	99	LHPDGTVLYGLR			1339.72	670.866	1339.72	670.87	2
55	Gabrb3	99	LHPDGTVLYGLR			1339.71	447.578	1339.72	447.582	3
55	Gabrb3	99	LLKGYDIR		missed K-G@3	976.541	489.278	976.571	489.293	2
55	Gabrb3	99	NSAISFDNSGIQYR			1570.74	786.378	1570.74	786.376	2
55	Gabrb3	99	NSAISFDNSGIQYR			1570.79	524.606	1570.74	524.586	3
55	Gabrb3	99	NSAISFDNSGIQYR	Deamidated(N)@8		1571.72	786.867	1571.72	786.868	2
55	Gabrb3	99	NVVFATGAYPR			1193.58	597.799	1193.62	597.817	2
55	Gabrb3	99	SFVHGVTVK			972.54	487.277	972.539	487.277	2
55	Gabrb3	82.09	SKSEINR		missed K-S@2	832.431	417.223	832.44	417.227	2
56	Gabrg1	99	ADDEDDEDLTMNK			1509.42	755.716	1509.58	755.796	2
56	Gabrg1	99	ADDEDDEDLTMNK	Oxidation(M)@11		1525.41	763.712	1525.57	763.794	2
56	Gabrg1	99	AFLFSPSLLWSQTR			1651.66	826.837	1651.87	826.943	2
56	Gabrg1	98.59	DCTSFFCCFDDCR	Propionamide(C)@2; Propionamide(C)@7; Propionamide(C)@8; Propionamide(C)@12		1844.41	923.212	1844.66	923.339	2
56	Gabrg1	94.19	IHEGDITQILNSLLQGYDNK			2269.9	757.639	2270.15	757.725	3
56	Gabrg1	54.39	IWIPDTFFR			1193.51	597.762	1193.62	597.819	2
56	Gabrg1	99	KPSVEVADPK			1068.54	535.276	1068.58	535.298	2
56	Gabrg1	99	KSDAHWITTPNR		missed K-S@1	1424.59	713.302	1424.72	713.365	2
56	Gabrg1	99	KSDAHWITTPNR		missed K-S@1	1424.78	475.933	1424.72	475.913	3
56	Gabrg1	97.45	LKFNSTMK		missed K-F@2	967.52	484.767	967.516	484.765	2
56	Gabrg1	99	LNSNMVGK		cleaved M-L@N-term	861.435	431.725	861.438	431.726	2
56	Gabrg1	59.83	LNSNMVGK	Oxidation(M)@5	cleaved M-L@N-term	877.436	439.725	877.433	439.724	2
56	Gabrg1	99	LYQFAFVGLR			1212.57	607.293	1212.67	607.34	2
56	Gabrg1	99	SDAHWITTPNR			1296.52	649.269	1296.62	649.318	2
56	Gabrg1	87.82	TSASPGLHAGSTLIPMNSISLPQGEDDYGYQCLEGK	Deamidated(N)@17; Propionamide(C)@32		3807.19	952.804	3807.76	952.947	4
56	Gabrg1	99	TSLGITTVLTMTTLSTIAR	Oxidation(M)@11		1994.77	998.39	1995.09	998.553	2
56	Gabrg1	99	TSLGITTVLTMTTLSTIAR			1978.8	990.406	1979.1	990.556	2
56	Gabrg1	99	TWVLAPK			813.469	407.742	813.475	407.745	2
56	Gabrg1	99	VLMLNSNMVGK			1204.55	603.281	1204.63	603.323	2
56	Gabrg1	99	VLMLNSNMVGK	Oxidation(M)@3; Oxidation(M)@8		1236.53	619.27	1236.62	619.318	2
56	Gabrg1	99	VLMLNSNMVGK	Oxidation(M)@3		1220.56	611.287	1220.63	611.32	2
56	Gabrg1	99	VLMLNSNMVGK	Oxidation(M)@8		1220.57	611.291	1220.63	611.32	2
57	Gabrg2	99	ADAHWITTPNR			1280.65	427.891	1280.63	427.883	3
57	Gabrg2	54.39	IWIPDTFFR			1193.51	597.762	1193.62	597.819	2
57	Gabrg2	75.29	KADAHWITTPNR		missed K-A@1	1408.8	470.608	1408.72	470.581	3
57	Gabrg2	99	LNSNMVGK			861.435	431.725	861.438	431.726	2
57	Gabrg2	59.83	LNSNMVGK	Oxidation(M)@5		877.436	439.725	877.433	439.724	2
57	Gabrg2	99	SDDDYEDYASNK			1420.53	711.272	1420.53	711.271	2
57	Gabrg2	99	SDDDYEDYASNK			1420.55	474.524	1420.53	474.516	3
57	Gabrg2	99	TSLGITTVLTMTTLSTIAR	Oxidation(M)@11		1994.77	998.39	1995.09	998.553	2
57	Gabrg2	99	TSLGITTVLTMTTLSTIAR			1978.8	990.406	1979.1	990.556	2
57	Gabrg2	82.51	TWVLTPK			843.472	422.743	843.485	422.75	2
58	Gabrp	76.3	DSEEVNITNIINSSISSFK			2096.02	699.68	2096.03	699.683	3
58	Gabrp	99	FLRPNFGGDPVR	Deamidated(N)@5		1374.73	459.252	1374.7	459.242	3
58	Gabrp	99	FLRPNFGGDPVR			1373.74	458.92	1373.72	458.914	3
58	Gabrp	99	IIDYFTIQNPSNVDR			1793.9	897.956	1793.89	897.955	2
58	Gabrp	98.77	IIDYFTIQNPSNVDR			1794.86	599.294	1793.89	598.972	3
58	Gabrp	80.52	IIDYFTIQNPSNVDR	Deamidated(N)@9		1794.91	898.462	1794.88	898.447	2
58	Gabrp	70.31	ITTTVTCNMDLSK	Propionamide(C)@7		1496.75	749.38	1496.72	749.368	2
58	Gabrp	65.99	ITTTVTCNMDLSK	Propionamide(C)@7; Oxidation(M)@9		1512.72	757.365	1512.72	757.365	2
58	Gabrp	99	KISFASIEISGDNVNYSDLTMK	Deamidated(N)@13; Oxidation(M)@21	missed K-I@1	2447.19	816.736	2448.17	817.065	3
58	Gabrp	99	KSFLHEVTVGNR		missed K-S@1	1385.8	462.942	1385.74	462.921	3
58	Gabrp	99	LFSNGTVLYALR			1352.73	677.373	1352.75	677.38	2
58	Gabrp	99	LSLPGFENLTAGYNK			1622.82	812.417	1622.83	812.422	2
58	Gabrp	98.06	LSLPGFENLTAGYNK			1622.79	541.936	1622.83	541.951	3
58	Gabrp	99	SDKLSLPGFENLTAGYNK		missed K-L@3	1953	977.506	1952.98	977.499	2
58	Gabrp	92.23	SDKLSLPGFENLTAGYNK	Deamidated(N)@11	missed K-L@3	1953.96	652.326	1953.97	652.33	3
58	Gabrp	99	SFLHEVTVGNR			1257.65	629.83	1257.65	629.831	2
58	Gabrp	99	SFLHEVTVGNR			1257.65	420.223	1257.65	420.223	3
58	Gabrp	99	SFLHEVTVGNR	Deamidated(N)@10		1258.65	630.33	1258.63	630.323	2
58	Gabrp	99	TCIQGNQVNVEVSR	Propionamide(C)@2; Deamidated(N)@6		1617.79	809.902	1617.78	809.896	2
58	Gabrp	53.65	TSLPNTNCFIK	Propionamide(C)@8		1307.65	654.832	1307.65	654.834	2
58	Gabrp	99	YPMDTQTCK	Propionamide(C)@8		1156.49	579.251	1156.49	579.252	2
58	Gabrp	99	YPMDTQTCK	Oxidation(M)@3; Propionamide(C)@8		1172.48	587.248	1172.48	587.249	2
59	Grin1	99	AQYIEFSKPFK			1356.49	679.251	1356.71	679.361	2
59	Grin1	79.21	AQYIEFSKPFK			1356.61	453.212	1356.71	453.243	3
59	Grin1	99	CDLVTTGELFFR	Propionamide(C)@1		1470.44	736.226	1470.72	736.366	2
59	Grin1	99	EAVNQANKR		missed K-R@8	1028.48	515.245	1028.54	515.275	2
59	Grin1	99	EEFTVNGDPVK			1233.41	617.711	1233.59	617.801	2
59	Grin1	57.74	EEFTVNGDPVKK		missed K-K@11	1361.68	454.901	1361.68	454.902	3
59	Grin1	73.96	ENITDPPR			940.426	471.22	940.461	471.238	2
59	Grin1	99	FANYSIMNLQNR			1469.42	735.718	1469.71	735.862	2
59	Grin1	99	FANYSIMNLQNR	Oxidation(M)@7		1485.45	743.73	1485.7	743.859	2
59	Grin1	99	GCVGNTNIWK	Propionamide(C)@2		1161.4	581.709	1161.56	581.787	2
59	Grin1	99	HNYESAAEAIQAVR			1557.43	779.723	1557.75	779.884	2
59	Grin1	99	HNYESAAEAIQAVR			1557.66	520.227	1557.75	520.258	3
59	Grin1	94.43	IIWPGGETEKPR			1381.49	691.751	1381.74	691.875	2
59	Grin1	84.28	IIWPGGETEKPR			1381.71	461.577	1381.74	461.586	3
59	Grin1	99	IPVLGLTTR			968.544	485.279	968.602	485.308	2
59	Grin1	99	ITGINDPR			884.47	443.242	884.472	443.243	2
59	Grin1	99	IVNIGAVLSTR			1141.54	571.775	1141.68	571.848	2
59	Grin1	89.47	KHEQMFR	Oxidation(M)@5	missed K-H@1	990.442	496.228	990.471	496.243	2
59	Grin1	97.63	KIIWPGGETEKPR		missed K-I@1	1509.8	504.275	1509.83	504.284	3
59	Grin1	99	KLVQVGIYNGTHVIPNDR	Deamidated(N)@9	missed K-L@1	2021.81	674.943	2023.09	675.369	3
59	Grin1	95.92	KLVQVGIYNGTHVIPNDR		missed K-L@1	2022.09	506.529	2022.1	506.533	4
59	Grin1	99	LVQVGIYNGTHVIPNDR			1893.71	632.244	1894.01	632.343	3
59	Grin1	91.85	MSIYSDK	Oxidation(M)@1		858.395	430.205	858.379	430.197	2
59	Grin1	76.06	MSIYSDK			842.383	422.199	842.384	422.199	2
59	Grin1	99	NPSDKFIYATVK		missed K-F@5	1381.51	691.761	1381.72	691.869	2
59	Grin1	99	NVTALLMEAR			1116.44	559.226	1116.6	559.305	2
59	Grin1	99	NVTALLMEAR	Oxidation(M)@7		1132.45	567.231	1132.59	567.303	2
59	Grin1	99	NYENLDQLSYDNK			1614.36	808.189	1614.72	808.365	2
59	Grin1	99	NYENLDQLSYDNK			1614.61	539.21	1614.72	539.246	3
59	Grin1	99	NYENLDQLSYDNKR		missed K-R@13	1770.41	886.214	1770.82	886.416	2
59	Grin1	92.51	NYENLDQLSYDNKR	Deamidated(N)@4	missed K-R@13	1770.64	591.22	1771.8	591.608	3
59	Grin1	99	QMQLAFAAVNVWR	Gln->pyro-Glu@N-term; Oxidation(M)@2		1532.37	767.19	1531.76	766.888	2
59	Grin1	99	QNVSLSILK	Gln->pyro-Glu@N-term		983.444	492.729	983.565	492.79	2
59	Grin1	86.51	QNVSLSILK			1000.52	501.265	1000.59	501.303	2
59	Grin1	99	QSSVDIYFR			1113.43	557.72	1113.55	557.78	2
59	Grin1	99	QVELSTMYR	Gln->pyro-Glu@N-term		1108.4	555.206	1108.52	555.268	2
59	Grin1	97.88	QVELSTMYR	Oxidation(M)@7		1141.42	571.718	1141.54	571.779	2
59	Grin1	97.16	QVELSTMYR			1125.44	563.725	1125.55	563.782	2
59	Grin1	97.46	RLETLLEER		missed R-L@1	1157.52	579.766	1157.64	579.828	2
59	Grin1	95.41	RLETLLEERESK		missed R-L@1; missed R-E@9	1501.81	501.61	1501.81	501.611	3
59	Grin1	99	SGFGIGMR			823.364	412.689	823.401	412.708	2
59	Grin1	99	SHENGFMEDLDKTWVR		missed K-T@12	1962.62	655.214	1962.89	655.304	3
59	Grin1	99	SHENGFMEDLDKTWVR	Oxidation(M)@7	missed K-T@12	1978.73	660.583	1978.88	660.635	3
59	Grin1	99	SIHLSFLR			971.501	486.758	971.555	486.785	2
59	Grin1	66.95	TGPLFKR		missed K-R@6	817.48	409.747	817.481	409.748	2
59	Grin1	98.86	VEFNEDGDR			1079.38	540.695	1079.45	540.733	2
59	Grin1	99	VEFNEDGDRK		missed R-K@9	1207.4	604.706	1207.55	604.781	2
59	Grin1	99	VICTGPNDTSPGSPR	Propionamide(C)@3		1570.42	786.219	1570.74	786.378	2
59	Grin1	99	VICTGPNDTSPGSPR	Propionamide(C)@3		1570.57	524.532	1570.74	524.588	3
59	Grin1	99	VIILSASEDDAATVYR			1721.46	861.739	1721.88	861.949	2
59	Grin1	98.55	VIILSASEDDAATVYR			1721.65	574.889	1721.88	574.968	3
59	Grin1	99	VLQFDPGTK			1003.46	502.737	1003.53	502.774	2
59	Grin1	99	YADGVTGR			837.427	419.721	837.398	419.706	2
59	Grin1	99	YAPDGIIGLQLINGK			1570.54	786.277	1570.87	786.443	2
59	Grin1	99	YQECDSR	Propionamide(C)@4		970.35	486.182	970.381	486.198	2
59	Grin1	99	YQGLTILVK			1033.52	517.769	1033.62	517.816	2
60	Grik1	99	FAVTSINR	Deamidated(N)@7		907.477	454.746	907.476	454.745	2
60	Grik1	98.98	FAVTSINR			906.482	454.248	906.492	454.253	2
60	Grik1	71.6	GTVLIQPGLWTR			1339.73	670.872	1339.76	670.888	2
60	Grik1	98.06	IGGIFETVENEPVNVEELAFK	Deamidated(N)@10		2333.15	778.724	2334.16	779.062	3
60	Grik1	67.22	IGGIFETVENEPVNVEELAFK			2333.14	778.72	2333.18	778.734	3
60	Grik1	99	INLFDSFEASR			1297.63	649.82	1297.63	649.822	2
60	Grik1	99	LQELIKAPSR		missed K-A@6	1153.58	577.799	1153.68	577.848	2
60	Grik1	99	TLMPNTTLTYDIQR	Oxidation(M)@3; Deamidated(N)@5		1682.82	842.416	1682.82	842.417	2
60	Grik1	99	TLMPNTTLTYDIQR	Oxidation(M)@3		1681.81	841.914	1681.83	841.925	2
60	Grik1	98.1	TLMPNTTLTYDIQR			1665.82	833.918	1665.84	833.927	2
60	Grik1	97.24	TLMPNTTLTYDIQR	Oxidation(M)@3; Deamidated(N)@5		1682.8	561.939	1682.82	561.947	3
60	Grik1	60.96	TLMPNTTLTYDIQR			1665.78	556.266	1665.84	556.287	3
60	Grik1	99	VIDFSKPFMTLGISILYR	Oxidation(M)@9		2115.26	706.095	2115.14	706.055	3
60	Grik1	99	YSGVNMTGFR			1130.39	566.2	1130.52	566.266	2
60	Grik1	99	YSGVNMTGFR	Oxidation(M)@6		1146.42	574.216	1146.51	574.264	2
60	Grik1	97.8	YSGVNMTGFR	Deamidated(N)@5; Oxidation(M)@6		1147.41	574.71	1147.5	574.756	2
60	Grik1	94.96	YSGVNMTGFR	Deamidated(N)@5		1131.43	566.723	1131.5	566.758	2
61	Grik4	99	ADLAVAGLTITAER			1399.74	700.879	1399.77	700.891	2
61	Grik4	99	AECLLNLEK	Propionamide(C)@3		1102.57	552.293	1102.57	552.292	2
61	Grik4	99	AKVEVDIFELLR		missed K-V@2	1430.79	716.4	1430.81	716.414	2
61	Grik4	99	DEFDLAILQLQENNR			1816.88	909.449	1816.9	909.455	2
61	Grik4	99	DSEYETAETMCQILPK	Oxidation(M)@10; Propionamide(C)@11		1943.85	972.932	1943.85	972.932	2
61	Grik4	99	DSEYETAETMCQILPK	Propionamide(C)@11		1927.83	964.923	1927.85	964.934	2
61	Grik4	86.78	DSEYETAETMCQILPK	Propionamide(C)@11		1927.95	643.657	1927.85	643.625	3
61	Grik4	99	ELAEILR			842.739	422.377	842.486	422.25	2
61	Grik4	99	GNHQEMEGNDRYEGFCVDMLK	Oxidation(M)@6; Deamidated(N)@9; Propionamide(C)@16	missed R-Y@11	2558.09	640.529	2559.05	640.769	4
61	Grik4	98.38	GVVAVLGPSSSPASSSIISNICGEK	Deamidated(N)@20; Propionamide(C)@22		2429.26	810.761	2430.23	811.084	3
61	Grik4	97.64	GVVAVLGPSSSPASSSIISNICGEK	Propionamide(C)@22		2429.24	810.755	2429.25	810.756	3
61	Grik4	99	GYGIGMPVGSVFR			1338.67	670.344	1338.68	670.345	2
61	Grik4	99	GYGIGMPVGSVFR	Oxidation(M)@6		1354.68	678.346	1354.67	678.342	2
61	Grik4	99	HSEASEVSVCQEMVTELR	Propionamide(C)@10		2103.97	702.331	2103.96	702.326	3
61	Grik4	99	HSEASEVSVCQEMVTELR	Propionamide(C)@10; Oxidation(M)@13		2120.01	707.676	2119.95	707.658	3
61	Grik4	99	IAAILDDPMECSR	Propionamide(C)@11		1503.72	752.868	1503.71	752.86	2
61	Grik4	99	IAAILDDPMECSR	Oxidation(M)@9; Propionamide(C)@11		1519.71	760.864	1519.7	760.858	2
61	Grik4	99	KADLAVAGLTITAER		missed K-A@1	1527.85	510.291	1527.86	510.295	3
61	Grik4	99	KADLAVAGLTITAER		missed K-A@1	1527.88	764.945	1527.86	764.938	2
61	Grik4	95.57	KADLAVAGLTITAEREK		missed K-A@1; missed R-E@15	1785.01	596.01	1785	596.007	3
61	Grik4	99	LAQEAALVAR			1040.56	521.286	1040.6	521.306	2
61	Grik4	99	LCGAGEPDQLAQR	Propionamide(C)@2		1427.7	714.856	1427.68	714.849	2
61	Grik4	99	LCGAGEPDQLAQR	Propionamide(C)@2		1427.66	476.895	1427.68	476.902	3
61	Grik4	97.71	LVGDGVYGVPEANGTWTGMVGELIAR	Deamidated(N)@13; Oxidation(M)@19		2676.3	893.106	2677.31	893.443	3
61	Grik4	99	MDSLVDDR			949.406	475.71	949.417	475.716	2
61	Grik4	99	MDSLVDDR	Oxidation(M)@1		965.407	483.711	965.412	483.713	2
61	Grik4	98.42	MLDDTRDPTPLLK	Oxidation(M)@1	missed R-D@6	1529.77	510.931	1529.78	510.933	3
61	Grik4	74.27	MLDDTRDPTPLLK		missed R-D@6	1513.75	505.592	1513.78	505.601	3
61	Grik4	72.98	MLDDTRDPTPLLK	Oxidation(M)@1	missed R-D@6	1529.79	765.903	1529.78	765.895	2
61	Grik4	99	MVELEGLTGHIEFNSK			1802.9	902.455	1802.89	902.451	2
61	Grik4	99	MVELEGLTGHIEFNSK	Oxidation(M)@1		1818.87	910.443	1818.88	910.448	2
61	Grik4	95.55	MVELEGLTGHIEFNSK			1802.88	601.968	1802.89	601.97	3
61	Grik4	95.49	MVELEGLTGHIEFNSK	Oxidation(M)@1		1818.87	607.298	1818.88	607.301	3
61	Grik4	99	MWNYMYSK	Oxidation(M)@1		1137.46	569.739	1137.46	569.738	2
61	Grik4	99	NCNLTQIGGLLDTK	Propionamide(C)@2		1559.77	780.891	1559.8	780.906	2
61	Grik4	92.09	NGFQQIGQWHVAEGLSMDSR	Oxidation(M)@17		2275.1	759.373	2275.04	759.355	3
61	Grik4	99	NIILCQDNIHPR	Propionamide(C)@5		1505.76	753.886	1505.78	753.896	2
61	Grik4	98	SEESLEWDK			1121.5	561.755	1121.49	561.751	2
61	Grik4	99	SEESLEWDKTTNSSEPE		missed K-T@9	1966.82	984.418	1966.83	984.421	2
61	Grik4	99	SGGLPPQPQVLEER			1505.6	502.872	1505.78	502.935	3
61	Grik4	99	SGGLPPQPQVLEER			1505.79	753.902	1505.78	753.899	2
61	Grik4	73.57	STEEGIAR			861.422	431.718	861.419	431.717	2
61	Grik4	99	VEVDIFELLR			1231.66	616.839	1231.68	616.848	2
61	Grik4	99	VIDFSKPFMTLGISILYR	Oxidation(M)@9		2115.26	706.095	2115.14	706.055	3
61	Grik4	96.25	YEGFCVDMLK	Propionamide(C)@5; Oxidation(M)@8		1290.57	646.292	1290.56	646.289	2
61	Grik4	93.01	YQTYQR			857.416	429.715	857.403	429.709	2
62	Gria1	99	ADVAVAPLTITLVR			1437.83	719.924	1437.86	719.935	2
62	Gria1	99	AWNGMVGELVYGR	Oxidation(M)@5		1466.68	734.349	1466.7	734.356	2
62	Gria1	99	FALSQLTEPPK			1229.66	615.837	1229.67	615.84	2
62	Gria1	99	FEGLTGNVQFNEK			1481.72	741.869	1481.72	741.865	2
62	Gria1	62.05	FSPYEWHSEEFEEGR			1927.82	643.614	1927.8	643.608	3
62	Gria1	70.26	FVPAATDAQAGGDNSSVQNR			2003.89	668.971	2003.93	668.984	3
62	Gria1	99	GKYAYLLESTMNEYIEQR	Oxidation(M)@11	missed K-Y@2	2222.83	741.95	2223.05	742.025	3
62	Gria1	99	GPVNLAVLK			909.55	455.782	909.565	455.79	2
62	Gria1	66.92	HVGYSYR			880.439	441.227	880.419	441.217	2
62	Gria1	86.46	IGYWNEDDKFVPAATDAQAGGDNSSVQNR		missed K-F@9	3124.36	782.098	3124.41	782.11	4
62	Gria1	79.87	IGYWNEDDKFVPAATDAQAGGDNSSVQNR	Deamidated(N)@5	missed K-F@9	3124.41	782.11	3125.4	782.356	4
62	Gria1	84.32	IMQQWR	Oxidation(M)@2		876.429	439.222	876.428	439.221	2
62	Gria1	99	KPCDTMK	Propionamide(C)@3		892.391	447.203	892.415	447.215	2
62	Gria1	93.92	LEIVSDGK			859.483	430.749	859.465	430.74	2
62	Gria1	99	LNAILGQIVK			1067.65	534.833	1067.67	534.842	2
62	Gria1	99	LSEQGVLDK			987.518	494.767	987.524	494.769	2
62	Gria1	99	LVVVDCESER	Propionamide(C)@6		1218.59	610.305	1218.59	610.303	2
62	Gria1	99	MLFQDLEK	Oxidation(M)@1		1038.51	520.26	1038.51	520.26	2
62	Gria1	96.74	MLFQDLEK			1022.51	512.264	1022.51	512.263	2
62	Gria1	99	MVSPIESAEDLAK			1388.67	695.341	1388.69	695.35	2
62	Gria1	99	MVSPIESAEDLAK	Oxidation(M)@1		1404.68	703.349	1404.68	703.348	2
62	Gria1	99	NANQFEGNDR			1163.49	582.753	1163.5	582.755	2
62	Gria1	99	QGCDISPR	Gln->pyro-Glu@N-term; Propionamide(C)@3	cleaved Q-Q@N-term	928.34	465.177	928.407	465.211	2
62	Gria1	99	QGCDISPR	Propionamide(C)@3	cleaved Q-Q@N-term	945.34	473.677	945.434	473.724	2
62	Gria1	99	QTEIAYGTLEAGSTK	Gln->pyro-Glu@N-term		1550.73	776.37	1550.75	776.38	2
62	Gria1	99	QTEIAYGTLEAGSTK			1567.78	784.896	1567.77	784.894	2
62	Gria1	99	SAEPSVFVR			990.519	496.267	990.513	496.264	2
62	Gria1	98.34	TNYTLHVIEMK			1347.69	450.236	1347.69	450.236	3
62	Gria1	69.37	TNYTLHVIEMK	Oxidation(M)@10		1363.71	455.576	1363.68	455.567	3
62	Gria1	93.86	TTEEGMIR			935.457	468.736	935.438	468.726	2
62	Gria1	99	VLDTAAEK			845.467	423.741	845.449	423.732	2
62	Gria1	99	VMAEAFQSLR			1150.57	576.292	1150.58	576.297	2
62	Gria1	99	VMAEAFQSLR	Oxidation(M)@2		1166.58	584.296	1166.58	584.295	2
62	Gria1	99	VVSQDFPK			918.493	460.254	918.481	460.248	2
62	Gria1	99	YAYLLESTMNEYIEQR	Oxidation(M)@9		2037.74	680.254	2037.94	680.319	3
62	Gria1	99	YTSALTYDGVK			1216.58	609.298	1216.6	609.306	2
63	Gria2	99	ADIAIAPLTITLVR			1465.71	733.862	1465.89	733.951	2
63	Gria2	99	DKVNDIVDQVITIGK		missed K-V@2	1655.73	828.872	1655.91	828.962	2
63	Gria2	99	DKVNDIVDQVITIGK	Deamidated(N)@4	missed K-V@2	1656.7	553.24	1656.89	553.305	3
63	Gria2	99	DKVNDIVDQVITIGK		missed K-V@2	1655.78	552.933	1655.91	552.977	3
63	Gria2	99	EGYNVYGIESVK			1356.49	679.254	1356.66	679.335	2
63	Gria2	99	EGYNVYGIESVKI		missed K-I@12	1469.58	735.797	1469.74	735.877	2
63	Gria2	99	EYPGAHTATIK			1186.46	594.235	1186.6	594.306	2
63	Gria2	73.76	FAYLYDSDR			1148.42	575.218	1148.51	575.264	2
63	Gria2	97.17	FDQNGKR		missed K-R@6	863.348	432.681	863.425	432.72	2
63	Gria2	99	FSPYEWHTEEFEDGR			1927.57	964.795	1927.8	964.908	2
63	Gria2	76.7	FSPYEWHTEEFEDGR			1927.59	643.538	1927.8	643.608	3
63	Gria2	99	GADQEYSAFR			1142.38	572.196	1142.5	572.257	2
63	Gria2	99	GKYAYLLESTMNEYIEQR	Oxidation(M)@11	missed K-Y@2	2222.83	741.95	2223.05	742.025	3
63	Gria2	99	GLSTLQAVLDSAAEK			1501.64	751.827	1501.8	751.907	2
63	Gria2	99	GLSTLQAVLDSAAEK			1501.59	501.536	1501.8	501.607	3
63	Gria2	99	GLSTLQAVLDSAAEKK		missed K-K@15	1629.72	815.866	1629.89	815.954	2
63	Gria2	68.4	GNAGDCLANPAVPWGQGVEIER	Propionamide(C)@6		2322.79	775.271	2323.1	775.374	3
63	Gria2	99	GSSLGNAVNLAVLK			1341.6	671.806	1341.76	671.888	2
63	Gria2	99	GSSLGNAVNLAVLK	Deamidated(N)@9		1342.6	672.306	1342.75	672.38	2
63	Gria2	99	GSSLGNAVNLAVLK	Deamidated(N)@6		1342.59	672.302	1342.75	672.38	2
63	Gria2	99	GSSLGNAVNLAVLK			1341.55	448.191	1341.76	448.261	3
63	Gria2	99	IGYWSEVDK			1095.4	548.709	1095.52	548.769	2
63	Gria2	99	INYTINIMELK			1350.54	676.279	1350.72	676.368	2
63	Gria2	96.6	INYTINIMELK	Oxidation(M)@8		1366.59	684.3	1366.72	684.366	2
63	Gria2	99	IQFGGANVSGFQIVDYDDSLVSK			2458.97	820.663	2458.2	820.408	3
63	Gria2	99	IWNGMVGELVYGK			1464.56	733.285	1464.74	733.379	2
63	Gria2	99	IWNGMVGELVYGK	Deamidated(N)@3		1465.69	733.854	1465.73	733.871	2
63	Gria2	99	IWNGMVGELVYGK	Oxidation(M)@5		1480.71	741.365	1480.74	741.376	2
63	Gria2	99	IWNGMVGELVYGK			1465.51	489.512	1464.74	489.255	3
63	Gria2	99	KIGYWSEVDK		missed K-I@1	1223.49	612.752	1223.62	612.817	2
63	Gria2	54.23	KIGYWSEVDK		missed K-I@1	1223.48	408.836	1223.62	408.88	3
63	Gria2	99	KNHEMLEGNER		missed K-N@1	1355.48	678.749	1355.63	678.82	2
63	Gria2	93.18	KNHEMLEGNER		missed K-N@1	1355.54	452.854	1355.63	452.882	3
63	Gria2	99	KPCDTMK	Propionamide(C)@3		892.391	447.203	892.415	447.215	2
63	Gria2	99	KWQVTAINVGNINNDK		missed K-W@1	1812.76	907.387	1812.95	907.481	2
63	Gria2	99	KWQVTAINVGNINNDK		missed K-W@1	1812.73	605.251	1812.95	605.323	3
63	Gria2	99	KWQVTAINVGNINNDKK	Deamidated(N)@11	missed K-W@1; missed K-K@16	1940.91	486.234	1942.03	486.514	4
63	Gria2	99	KWQVTAINVGNINNDKK	Deamidated(N)@8	missed K-W@1; missed K-K@16	1941.94	648.32	1942.03	648.35	3
63	Gria2	99	LNEQGLLDK			1028.45	515.233	1028.55	515.282	2
63	Gria2	99	LNEQGLLDK	Deamidated(N)@2		1029.42	515.718	1029.53	515.774	2
63	Gria2	99	LNEQGLLDKLK		missed K-L@9	1269.6	635.808	1269.73	635.872	2
63	Gria2	99	LNEQGLLDKLK		missed K-L@9	1269.63	424.218	1269.73	424.25	3
63	Gria2	99	MVSPIESAEDLSK			1404.51	703.264	1404.68	703.348	2
63	Gria2	99	MVSPIESAEDLSK	Oxidation(M)@1		1420.54	711.275	1420.68	711.345	2
63	Gria2	99	MVSPIESAEDLSK			1404.64	469.222	1404.68	469.234	3
63	Gria2	99	MVVTLTELPSGNDTSGLENK	Oxidation(M)@1		2119.8	707.607	2120.03	707.684	3
63	Gria2	99	MVVTLTELPSGNDTSGLENK			2103.78	702.268	2104.04	702.353	3
63	Gria2	77.28	MWTYMR	Oxidation(M)@1		902.291	452.153	902.378	452.196	2
63	Gria2	99	NAQNINPSSSQNSQNFATYK	Deamidated(N)@12		2212.08	738.368	2213	738.673	3
63	Gria2	95.29	NAQNINPSSSQNSQNFATYK			2212.79	738.603	2212.01	738.345	3
63	Gria2	99	NHEMLEGNER			1227.42	614.715	1227.53	614.772	2
63	Gria2	99	NHEMLEGNER	Oxidation(M)@4		1243.39	622.702	1243.53	622.77	2
63	Gria2	99	NHEMLEGNER			1227.36	410.128	1227.53	410.184	3
63	Gria2	99	NHEMLEGNER	Deamidated(N)@8		1228.4	615.209	1228.51	615.264	2
63	Gria2	79.09	NHEMLEGNER	Oxidation(M)@4		1243.4	415.474	1243.53	415.516	3
63	Gria2	99	NKWWYDKGECGSGGGDSK	Propionamide(C)@10	missed K-W@2; missed K-G@7	2043.77	511.949	2043.87	511.976	4
63	Gria2	99	QGCDISPR	Gln->pyro-Glu@N-term; Propionamide(C)@3		928.34	465.177	928.407	465.211	2
63	Gria2	99	QGCDISPR	Propionamide(C)@3		945.34	473.677	945.434	473.724	2
63	Gria2	95.82	QRIEISR	Gln->pyro-Glu@N-term	missed R-I@2	883.393	442.704	883.488	442.751	2
63	Gria2	99	QTEIAYGTLDSGSTK	Gln->pyro-Glu@N-term		1552.54	777.279	1552.73	777.37	2
63	Gria2	99	QTEIAYGTLDSGSTK			1569.59	785.804	1569.75	785.883	2
63	Gria2	99	QTEIAYGTLDSGSTK			1569.56	524.194	1569.75	524.258	3
63	Gria2	99	QVQVEGLSGNIK	Gln->pyro-Glu@N-term		1253.5	627.755	1253.66	627.838	2
63	Gria2	99	QVQVEGLSGNIK			1270.55	636.281	1270.69	636.351	2
63	Gria2	99	QVQVEGLSGNIKFDQNGK	Gln->pyro-Glu@N-term	missed K-F@12	1942.78	972.395	1942.97	972.495	2
63	Gria2	99	QVQVEGLSGNIKFDQNGKR	Gln->pyro-Glu@N-term	missed K-F@12; missed K-R@18	2098.86	700.627	2099.08	700.699	3
63	Gria2	56.68	QVQVEGLSGNIKFDQNGKR	Deamidated(N)@10	missed K-F@12; missed K-R@18	2115.91	706.309	2117.09	706.703	3
63	Gria2	99	RGNAGDCLANPAVPWGQGVEIER	Propionamide(C)@7	missed R-G@1	2478.84	620.718	2479.2	620.808	4
63	Gria2	99	RINYTINIMELK		missed R-I@1	1506.65	503.225	1506.82	503.282	3
63	Gria2	95.82	RVILDCER	Propionamide(C)@6	missed R-V@1	1073.45	537.731	1073.57	537.79	2
63	Gria2	99	SAEPSVFVR			990.519	496.267	990.513	496.264	2
63	Gria2	99	SKIAVFDK		missed K-I@2	906.41	454.212	906.517	454.266	2
63	Gria2	99	SLFQDLELK			1091.62	546.817	1091.59	546.8	2
63	Gria2	99	SLFQDLELKK		missed K-K@9	1219.51	610.761	1219.68	610.848	2
63	Gria2	99	SLFQDLELKK		missed K-K@9	1219.62	407.549	1219.68	407.568	3
63	Gria2	94.84	SLFQDLELKKER		missed K-K@9	1504.55	502.524	1504.82	502.616	3
63	Gria2	63.62	SLFQDLELKKER		missed K-K@9	1504.67	753.345	1504.82	753.42	2
63	Gria2	99	TTAEGVAR			803.388	402.702	803.414	402.714	2
63	Gria2	99	TVVVTTILESPYVMMK			1809.73	905.873	1809.96	905.988	2
63	Gria2	99	TVVVTTILESPYVMMK	Oxidation(M)@14; Oxidation(M)@15		1841.74	921.875	1841.95	921.983	2
63	Gria2	99	TVVVTTILESPYVMMK	Oxidation(M)@15		1825.75	913.885	1825.96	913.986	2
63	Gria2	81.31	TVVVTTILESPYVMMK	Oxidation(M)@14; Oxidation(M)@15		1841.71	614.909	1841.95	614.991	3
63	Gria2	99	VGMVQFSTSEFR	Oxidation(M)@3		1402.5	702.257	1402.66	702.335	2
63	Gria2	99	VGMVQFSTSEFR			1386.5	694.26	1386.66	694.337	2
63	Gria2	98.99	VILDCER	Propionamide(C)@5		917.339	459.677	917.464	459.739	2
63	Gria2	99	VILDCERDK	Propionamide(C)@5	missed R-D@7	1160.49	581.25	1160.59	581.3	2
63	Gria2	99	VNDIVDQVITIGK			1412.61	707.313	1412.79	707.401	2
63	Gria2	99	WQVTAINVGNINNDK			1684.63	562.55	1684.85	562.625	3
63	Gria2	99	WQVTAINVGNINNDK			1684.66	843.337	1684.85	843.434	2
63	Gria2	99	WQVTAINVGNINNDKKDETYR		missed K-K@15	2477.05	620.27	2477.23	620.315	4
63	Gria2	80.4	WQVTAINVGNINNDKKDETYR		missed K-K@15	2476.98	826.668	2477.23	826.751	3
63	Gria2	76.38	WSTLEEK			891.367	446.691	891.434	446.724	2
63	Gria2	99	YAYLLESTMNEYIEQR	Oxidation(M)@9		2037.74	680.254	2037.94	680.319	3
63	Gria2	99	YEGYCVDLAAEIAK	Propionamide(C)@5		1614.57	808.29	1614.76	808.387	2
63	Gria2	99	YKLTIVGDGK		missed K-L@2	1092.5	547.259	1092.62	547.316	2
64	Gria3	99	ADIAVAPLTITLVR			1451.91	484.976	1451.87	484.964	3
64	Gria3	99	ADIAVAPLTITLVR			1451.78	726.897	1451.87	726.943	2
64	Gria3	96.61	AGYWNEYER			1186.43	594.22	1186.5	594.259	2
64	Gria3	95.28	FVPFSDQQISNDSSSSGNR			2070.79	691.271	2070.92	691.315	3
64	Gria3	99	FVYLYDTER			1204.5	603.258	1204.58	603.295	2
64	Gria3	99	GAILSLLGYYK			1196.57	599.291	1196.68	599.348	2
64	Gria3	99	GSAGDCLANPAVPWSQGIDIER	Propionamide(C)@6		2325.96	776.326	2326.1	776.374	3
64	Gria3	99	GYHYMLANLGFTDIVLER	Deamidated(N)@8		2110.86	704.629	2112.03	705.019	3
64	Gria3	95.93	IIEEMDR			904.375	453.195	904.432	453.223	2
64	Gria3	99	IIEEMDRR		missed R-R@7	1060.48	531.247	1060.53	531.274	2
64	Gria3	99	INTILEQVVILGK			1438.77	720.393	1438.88	720.445	2
64	Gria3	99	IWNGMVGELVYGR	Deamidated(N)@3; Oxidation(M)@5		1509.64	755.828	1509.73	755.872	2
64	Gria3	99	IWNGMVGELVYGR			1492.72	498.58	1492.75	498.59	3
64	Gria3	99	IWNGMVGELVYGR			1492.63	747.32	1492.75	747.382	2
64	Gria3	99	IWNGMVGELVYGR	Deamidated(N)@3; Oxidation(M)@5		1509.89	504.303	1509.73	504.25	3
64	Gria3	99	IWNGMVGELVYGR	Oxidation(M)@5		1508.65	755.332	1508.74	755.38	2
64	Gria3	99	KAGYWNEYER		missed K-A@1	1314.52	658.266	1314.6	658.307	2
64	Gria3	99	KNHEQLEGNER		missed K-N@1	1352.55	677.281	1352.64	677.329	2
64	Gria3	90.94	KNHEQLEGNER		missed K-N@1	1352.61	451.876	1352.64	451.888	3
64	Gria3	50.47	LDEREFPEAK		missed R-E@4	1232.55	617.28	1232.6	617.309	2
64	Gria3	99	MGQSVLR	Oxidation(M)@1		805.362	403.688	805.412	403.713	2
64	Gria3	99	MVQVQGMTGNIQFDTYGR	Oxidation(M)@1		2059.85	687.624	2059.95	687.656	3
64	Gria3	99	MVQVQGMTGNIQFDTYGR	Oxidation(M)@7; Deamidated(N)@10		2059.81	687.61	2060.93	687.984	3
64	Gria3	85.55	MVQVQGMTGNIQFDTYGR	Oxidation(M)@7		2059.8	687.606	2059.95	687.656	3
64	Gria3	99	NHEQLEGNER			1224.45	613.233	1224.55	613.281	2
64	Gria3	99	NHEQLEGNER			1224.27	409.096	1224.55	409.19	3
64	Gria3	99	NHEQLEGNERYEGYCVDLAYEIAK	Deamidated(N)@8; Propionamide(C)@15	missed R-Y@10	2913.06	729.272	2914.31	729.584	4
64	Gria3	99	NTVQEHSAFR			1187.46	594.738	1187.57	594.791	2
64	Gria3	96.4	NTVQEHSAFR	Deamidated(N)@1		1188.48	595.247	1188.55	595.283	2
64	Gria3	99	QGCDISPR	Gln->pyro-Glu@N-term; Propionamide(C)@3	cleaved Q-Q@N-term	928.34	465.177	928.407	465.211	2
64	Gria3	99	QGCDISPR	Propionamide(C)@3	cleaved Q-Q@N-term	945.34	473.677	945.434	473.724	2
64	Gria3	99	QRVDVSR	Gln->pyro-Glu@N-term	missed R-V@2	841.4	421.707	841.441	421.728	2
64	Gria3	91.01	QRVDVSR		missed R-V@2	858.414	430.214	858.467	430.241	2
64	Gria3	99	RIIEEMDRR		missed R-I@1; missed R-R@8	1216.6	406.542	1216.63	406.552	3
64	Gria3	99	RTNYTIDVYEMK		missed R-T@1	1531.64	511.553	1531.73	511.585	3
64	Gria3	92.13	RTNYTIDVYEMK		missed R-T@1	1531.64	766.828	1531.73	766.874	2
64	Gria3	99	SVGNIKDIQEFR			1404.64	703.329	1404.74	703.375	2
64	Gria3	99	SVGNIKDIQEFR			1404.59	469.204	1404.74	469.253	3
64	Gria3	99	TIVVTTILESPYVMYK	Oxidation(M)@14		1871.85	936.934	1872	937.005	2
64	Gria3	99	TIVVTTILESPYVMYK			1855.86	928.937	1856	929.008	2
64	Gria3	92.84	TIVVTTILESPYVMYK			1855.82	619.615	1856	619.674	3
64	Gria3	74.81	TIVVTTILESPYVMYK	Oxidation(M)@14		1872.82	625.279	1872	625.006	3
64	Gria3	99	TNYTIDVYEMK			1375.52	688.766	1375.63	688.824	2
64	Gria3	99	TNYTIDVYEMK	Oxidation(M)@10		1391.52	696.768	1391.63	696.821	2
64	Gria3	93.23	TNYTIDVYEMK	Deamidated(N)@2		1376.55	689.283	1376.62	689.316	2
64	Gria3	99	VMHGGANITGFQIVNNENPMVQQFIQR	Oxidation(M)@2; Deamidated(N)@18; Oxidation(M)@20		3073.37	769.351	3074.47	769.625	4
64	Gria3	99	VMHGGANITGFQIVNNENPMVQQFIQR	Deamidated(N)@18; Oxidation(M)@20		3057.23	765.315	3058.48	765.626	4
64	Gria3	99	YEGYCVDLAYEIAK	Propionamide(C)@5		1706.65	854.331	1706.79	854.4	2
64	Gria3	99	YEGYCVDLAYEIAK	Propionamide(C)@5		1706.63	569.884	1706.79	569.936	3
64	Gria3	85.18	YGARDPETK		missed R-D@4	1035.44	518.729	1035.5	518.757	2
64	Gria3	99	YLIDCEVER	Propionamide(C)@5		1209.47	605.741	1209.57	605.792	2
65	Gria4	99	AVHTGTAIR			924.51	463.262	924.514	463.264	2
65	Gria4	57.12	EYPGSETPPK			1103.48	552.745	1103.51	552.764	2
65	Gria4	99	FSPYEWHTEEPEDGK			1849.79	925.901	1849.78	925.897	2
65	Gria4	77.32	FSPYEWHTEEPEDGK			1849.77	617.597	1849.78	617.6	3
65	Gria4	99	FVIDCEIER	Propionamide(C)@5		1193.57	597.79	1193.58	597.795	2
65	Gria4	99	GVFAIFGLYDK			1228.62	615.317	1228.65	615.332	2
65	Gria4	99	GVFAIFGLYDKR		missed K-R@11	1384.74	693.38	1384.75	693.382	2
65	Gria4	99	GYHYIIANLGFK			1394.72	698.365	1394.73	698.375	2
65	Gria4	99	GYSILQAIMEK			1251.62	626.819	1251.65	626.834	2
65	Gria4	99	GYSILQAIMEK	Oxidation(M)@9		1267.63	634.821	1267.65	634.831	2
65	Gria4	99	IAIVPDGK			811.426	406.72	811.48	406.747	2
65	Gria4	99	IWNGMVGELVYGK			1464.58	733.299	1464.74	733.379	2
65	Gria4	99	IWNGMVGELVYGK	Deamidated(N)@3		1465.69	733.854	1465.73	733.871	2
65	Gria4	99	IWNGMVGELVYGK	Oxidation(M)@5		1480.71	741.365	1480.74	741.376	2
65	Gria4	99	IWNGMVGELVYGK			1465.51	489.512	1464.74	489.255	3
65	Gria4	96.77	KFVIDCEIER	Propionamide(C)@6	missed K-F@1	1321.65	661.833	1321.67	661.842	2
65	Gria4	90.61	KNHEMFEGNDKYEGYCVDLASEIAK	Deamidated(N)@2; Oxidation(M)@5; Propionamide(C)@16	missed K-N@1; missed K-Y@11	2976.29	745.079	2977.31	745.335	4
65	Gria4	99	KPCDTMK	Propionamide(C)@3		892.391	447.203	892.415	447.215	2
65	Gria4	99	KVGYWNDMDK		missed K-V@1	1254.55	628.283	1254.57	628.292	2
65	Gria4	95.45	KVGYWNDMDK	Oxidation(M)@8	missed K-V@1	1270.55	636.283	1270.57	636.29	2
65	Gria4	99	LQNILEQIVSVGK			1439.77	480.93	1439.83	480.952	3
65	Gria4	99	LQNILEQIVSVGK	Deamidated(N)@3		1440.8	721.405	1440.82	721.417	2
65	Gria4	99	LQNILEQIVSVGK			1439.79	720.9	1439.83	720.925	2
65	Gria4	99	LSEAGVLDK			930.473	466.244	930.502	466.258	2
65	Gria4	99	LSEAGVLDKLK		missed K-L@9	1171.65	586.834	1171.68	586.848	2
65	Gria4	99	LSITGSVGENGR	Deamidated(N)@10		1189.57	595.794	1189.59	595.804	2
65	Gria4	99	LSITGSVGENGR			1188.58	595.299	1188.61	595.312	2
65	Gria4	99	LTFSEAIR			935.499	468.757	935.508	468.761	2
65	Gria4	99	MVSPIESAEDLAK			1388.67	695.341	1388.69	695.35	2
65	Gria4	99	MVSPIESAEDLAK	Oxidation(M)@1		1404.68	703.349	1404.68	703.348	2
65	Gria4	77.28	MWTYMR	Oxidation(M)@1		902.291	452.153	902.378	452.196	2
65	Gria4	99	NHEMFEGNDK			1219.51	610.761	1219.49	610.754	2
65	Gria4	99	NHEMFEGNDKYEGYCVDLASEIAK	Deamidated(N)@8; Propionamide(C)@15	missed K-Y@10	2832.25	945.092	2833.22	945.414	3
65	Gria4	60.7	NHEMFEGNDKYEGYCVDLASEIAK	Oxidation(M)@4; Propionamide(C)@15	missed K-Y@10	2848.27	950.43	2848.23	950.418	3
65	Gria4	51.13	NHEMFEGNDKYEGYCVDLASEIAK	Oxidation(M)@4; Deamidated(N)@8; Propionamide(C)@15	missed K-Y@10	2848.26	950.429	2849.22	950.746	3
65	Gria4	97.1	NKWWYDKGECGPK	Propionamide(C)@10	missed K-W@2; missed K-G@7	1680.8	561.273	1680.77	561.265	3
65	Gria4	99	NTDQEYTAFR			1243.51	622.765	1243.55	622.781	2
65	Gria4	99	NTDQEYTAFR	Deamidated(N)@1		1244.54	623.276	1244.53	623.273	2
65	Gria4	99	QGCDISPR	Gln->pyro-Glu@N-term; Propionamide(C)@3	cleaved Q-Q@N-term	928.34	465.177	928.407	465.211	2
65	Gria4	99	QGCDISPR	Propionamide(C)@3	cleaved Q-Q@N-term	945.34	473.677	945.434	473.724	2
65	Gria4	90.65	QKIDISR	Gln->pyro-Glu@N-term	missed K-I@2	841.449	421.732	841.466	421.74	2
65	Gria4	96.96	QLLEELDR			1014.54	508.28	1014.53	508.275	2
65	Gria4	93.01	QLLEELDR	Gln->pyro-Glu@N-term		997.478	499.746	997.508	499.761	2
65	Gria4	95.78	QLLEELDRR	Gln->pyro-Glu@N-term	missed R-R@8	1153.63	577.823	1153.61	577.812	2
65	Gria4	90.63	QLLEELDRR		missed R-R@8	1170.61	586.311	1170.64	586.325	2
65	Gria4	99	QSSGLAVIASDLP	Gln->pyro-Glu@N-term		1239.58	620.798	1239.63	620.825	2
65	Gria4	83.69	QSSGLAVIASDLP			1256.58	629.295	1256.66	629.338	2
65	Gria4	99	QTEIAYGTLDSGSTK			1569.59	785.804	1569.75	785.883	2
65	Gria4	99	QTEIAYGTLDSGSTK	Gln->pyro-Glu@N-term		1552.54	777.279	1552.73	777.37	2
65	Gria4	99	QTEIAYGTLDSGSTK			1569.56	524.194	1569.75	524.258	3
65	Gria4	99	RGNAGDCLANPAAPWGQGIDMER	Propionamide(C)@7; Deamidated(N)@10; Oxidation(M)@21	missed R-G@1	2485.07	829.364	2486.11	829.71	3
65	Gria4	99	RGNAGDCLANPAAPWGQGIDMER	Propionamide(C)@7	missed R-G@1	2469.13	824.051	2469.13	824.05	3
65	Gria4	99	RVNYTMDVFELK		missed R-V@1	1513.71	505.576	1513.76	505.594	3
65	Gria4	99	SAEPSVFTR			992.474	497.244	992.493	497.254	2
65	Gria4	99	TPVNLAVLK			953.576	477.795	953.591	477.803	2
65	Gria4	99	TTAEGVAR			803.388	402.702	803.414	402.714	2
65	Gria4	99	TVVVTTIMESPYVMYK	Oxidation(M)@14		1875.88	938.948	1875.94	938.975	2
65	Gria4	99	TVVVTTIMESPYVMYK			1859.89	930.953	1859.94	930.978	2
65	Gria4	99	TVVVTTIMESPYVMYK	Oxidation(M)@8		1875.9	938.955	1875.94	938.975	2
65	Gria4	76.53	TVVVTTIMESPYVMYK	Oxidation(M)@8; Oxidation(M)@14		1891.87	946.941	1891.93	946.973	2
65	Gria4	74.15	TVVVTTIMESPYVMYK	Oxidation(M)@8; Oxidation(M)@14		1892.84	631.954	1891.93	631.651	3
65	Gria4	99	VGYWNDMDK			1126.43	564.22	1126.48	564.245	2
65	Gria4	65.23	VLTPDCPK	Propionamide(C)@6		942.502	472.258	942.484	472.25	2
65	Gria4	99	VNYTMDVFELK	Oxidation(M)@5		1373.63	687.821	1373.65	687.834	2
65	Gria4	99	VNYTMDVFELK			1357.67	679.84	1357.66	679.837	2
65	Gria4	53.26	WWYDKGECGPK	Propionamide(C)@8	missed K-G@5	1438.67	480.565	1438.63	480.552	3
66	Gabrr2	98.88	EKLPCMCGMLHSR	Propionamide(C)@5; Propionamide(C)@7	missed K-L@2	1645.67	823.843	1645.76	823.885	2
66	Gabrr2	94.73	EKLPCMCGMLHSR	Propionamide(C)@5; Propionamide(C)@7	missed K-L@2	1645.76	549.593	1645.76	549.593	3
66	Gabrr2	99	GQMGLYIFQNTHAIDK	Oxidation(M)@3; Deamidated(N)@10		1850.85	617.956	1851.88	618.301	3
66	Gabrr2	99	GQMGLYIFQNTHAIDK			1834.86	612.629	1834.9	612.642	3
66	Gabrr2	99	GQMGLYIFQNTHAIDK	Oxidation(M)@3		1850.85	617.958	1850.9	617.973	3
66	Gabrr2	79.65	HYWRDER		missed R-D@4	1060.47	531.245	1060.48	531.249	2
66	Gabrr2	99	ISLSQFLIQK			1175.62	588.817	1175.69	588.853	2
66	Gabrr2	96.97	IWVPDVFFVHSK			1472.72	737.367	1472.78	737.398	2
66	Gabrr2	90.6	IWVPDVFFVHSK			1472.73	491.918	1472.78	491.934	3
66	Gabrr2	99	KIWVPDVFFVHSK		missed K-I@1	1600.81	801.412	1600.88	801.446	2
66	Gabrr2	52.24	KIWVPDVFFVHSK		missed K-I@1	1600.87	534.63	1600.88	534.633	3
66	Gabrr2	99	LAFPSSSNK			949.465	475.74	949.487	475.751	2
66	Gabrr2	99	LPCMCGMLHSR	Propionamide(C)@3; Propionamide(C)@5		1388.56	695.288	1388.62	695.317	2
66	Gabrr2	80.96	LPCMCGMLHSR	Propionamide(C)@3; Propionamide(C)@5		1388.64	463.887	1388.62	463.88	3
66	Gabrr2	99	NGDESLKTDEK		missed K-T@7	1234.51	618.263	1234.57	618.291	2
66	Gabrr2	99	NGDESLKTDEK	Deamidated(N)@1	missed K-T@7	1235.53	618.771	1235.55	618.783	2
66	Gabrr2	68.54	NGDESLKTDEK		missed K-T@7	1234.57	412.531	1234.57	412.53	3
66	Gabrr2	79.18	RSFIHDTTTDNIMLR	Oxidation(M)@13	missed R-S@1	1834.92	612.646	1834.9	612.64	3
66	Gabrr2	99	SFIHDTTTDNIMLR			1662.72	832.367	1662.8	832.409	2
66	Gabrr2	99	SFIHDTTTDNIMLR	Oxidation(M)@12		1678.74	840.376	1678.8	840.406	2
66	Gabrr2	98.24	SFIHDTTTDNIMLR	Oxidation(M)@12		1678.75	560.589	1678.8	560.607	3
66	Gabrr2	97.05	SFIHDTTTDNIMLR			1662.78	555.269	1662.8	555.275	3
66	Gabrr2	89.02	SFIHDTTTDNIMLR	Deamidated(N)@10		1663.76	555.594	1663.79	555.603	3
66	Gabrr2	78.12	SFIHDTTTDNIMLR	Deamidated(N)@10		1663.73	832.875	1663.79	832.901	2
66	Gabrr2	82.23	SMTFDGR	Oxidation(M)@2		828.328	415.171	828.344	415.179	2
66	Gabrr2	80.4	TDEKISLSQFLIQK		missed K-I@4	1648.87	550.631	1648.9	550.642	3
66	Gabrr2	99	TMMLDGSYSESEANSLAGYPR	Oxidation(M)@2		2293.84	765.62	2293.98	765.668	3
66	Gabrr2	99	TMMLDGSYSESEANSLAGYPR	Oxidation(M)@2; Oxidation(M)@3		2309.88	770.967	2309.98	771	3
66	Gabrr2	99	TMMLDGSYSESEANSLAGYPR	Oxidation(M)@3		2293.85	765.626	2293.98	765.668	3
66	Gabrr2	99	TMMLDGSYSESEANSLAGYPR			2277.89	760.304	2277.99	760.337	3
66	Gabrr2	99	VFPDGHVLYSMR			1419.63	710.824	1419.7	710.856	2
66	Gabrr2	99	VFPDGHVLYSMR	Oxidation(M)@11		1435.64	718.828	1435.69	718.853	2
67	P2rx1	99	DPAATSSTLGLQENMR	Oxidation(M)@15		1705.79	853.904	1705.79	853.904	2
67	P2rx1	99	DPAATSSTLGLQENMR	Deamidated(N)@14; Oxidation(M)@15		1706.76	854.388	1706.78	854.396	2
67	P2rx1	95.66	ESGQDFR			837.332	419.673	837.362	419.688	2
67	P2rx1	99	FDILVDGK			905.473	453.744	905.486	453.75	2
67	P2rx1	99	GYQTSSGLISSVSVK			1511.78	756.898	1511.78	756.899	2
67	P2rx1	99	GYQTSSGLISSVSVK			1511.74	504.921	1511.78	504.935	3
67	P2rx1	98.21	HCKPIYQFHGLYGEK	Propionamide(C)@2		1889.95	945.98	1889.92	945.97	2
67	P2rx1	96.69	HCKPIYQFHGLYGEK	Propionamide(C)@2		1890	473.508	1889.92	473.488	4
67	P2rx1	99	HFVQNGTNR			1071.52	536.766	1071.52	536.768	2
67	P2rx1	99	HFVQNGTNR	Deamidated(N)@5		1072.5	537.257	1072.51	537.26	2
67	P2rx1	99	HFVQNGTNRR	Deamidated(N)@5	missed R-R@9	1228.62	615.317	1228.61	615.31	2
67	P2rx1	74.14	ILHPLCPVFSLGYVVR	Propionamide(C)@6		1882.97	628.664	1883.05	628.69	3
67	P2rx1	87.8	KCLYHK	Propionamide(C)@2	missed K-C@1	861.435	431.725	861.453	431.734	2
67	P2rx1	99	LQDELSAFFFEYDTPR			1976.88	989.448	1976.92	989.465	2
67	P2rx1	96.1	NFTLFIK		cleaved E-N@N-term	881.401	441.708	881.501	441.758	2
67	P2rx1	91.71	NFTLFIK	Deamidated(N)@1	cleaved E-N@N-term	882.401	442.208	882.485	442.25	2
67	P2rx1	97.02	NLSPGFNFR			1050.52	526.267	1050.52	526.27	2
67	P2rx1	99	NLVEEVNGTYMK	Oxidation(M)@11		1411.65	706.83	1411.67	706.84	2
67	P2rx1	99	NLVEEVNGTYMK	Deamidated(N)@7; Oxidation(M)@11		1412.66	707.335	1412.65	707.332	2
67	P2rx1	99	NLVEEVNGTYMK	Deamidated(N)@7		1396.65	699.333	1396.65	699.334	2
67	P2rx1	99	NLVEEVNGTYMK			1395.65	698.835	1395.67	698.842	2
67	P2rx1	99	NLVEEVNGTYMK			1395.69	466.236	1395.67	466.231	3
67	P2rx1	98.98	NLVEEVNGTYMK	Deamidated(N)@1; Oxidation(M)@11		1412.64	707.33	1412.65	707.332	2
67	P2rx1	99	NLVEEVNGTYMKK	Deamidated(N)@7; Oxidation(M)@11	missed K-K@12	1540.77	771.391	1540.74	771.379	2
67	P2rx1	87.37	NLVEEVNGTYMKK	Oxidation(M)@11	missed K-K@12	1539.76	770.886	1539.76	770.887	2
67	P2rx1	56.78	NLVEEVNGTYMKK	Deamidated(N)@7; Oxidation(M)@11	missed K-K@12	1540.79	514.604	1540.74	514.589	3
67	P2rx1	90.97	NSISFPR			819.424	410.719	819.424	410.719	2
67	P2rx1	84.34	NSISFPR	Deamidated(N)@1		820.414	411.214	820.408	411.211	2
67	P2rx1	97.65	RLQDELSAFFFEYDTPR		missed R-L@1	2133.02	712.015	2133.02	712.013	3
67	P2rx1	99	TGNCVPFNGTVK	Propionamide(C)@4		1306.63	654.32	1306.63	654.324	2
67	P2rx1	66.96	TGNCVPFNGTVK	Propionamide(C)@4; Deamidated(N)@8		1307.62	654.818	1307.62	654.816	2
67	P2rx1	99	YAEDMGPGEGER			1309.53	655.773	1309.52	655.77	2
67	P2rx1	99	YAEDMGPGEGER	Oxidation(M)@5		1326.1	664.057	1325.52	663.767	2
67	P2rx1	95.72	YAEDMGPGEGERDPAATSSTLGLQENMR		missed R-D@12	2981.38	994.8	2981.31	994.778	3
67	P2rx1	65.1	YAEDMGPGEGERDPAATSSTLGLQENMR	Oxidation(M)@5	missed R-D@12	2997.32	750.336	2997.31	750.334	4
67	P2rx1	61.76	YAEDMGPGEGERDPAATSSTLGLQENMR	Oxidation(M)@5; Oxidation(M)@27	missed R-D@12	3013.33	754.34	3013.3	754.333	4
67	P2rx1	51.21	YAEDMGPGEGERDPAATSSTLGLQENMR	Oxidation(M)@27	missed R-D@12	2997.18	750.302	2997.31	750.334	4
68	P2rx3	99	APFCPILR	Propionamide(C)@4		986.522	494.269	986.537	494.276	2
68	P2rx3	99	AWDQCIPK	Propionamide(C)@5		1030.43	516.22	1030.49	516.253	2
68	P2rx3	98.63	CVNYSSVR	Propionamide(C)@1		997.452	499.733	997.465	499.74	2
68	P2rx3	99	CVSDSQCGPER	Propionamide(C)@1; Propionamide(C)@7		1321.51	661.762	1321.54	661.777	2
68	P2rx3	99	CVSDSQCGPERFPGGGILTGR	Propionamide(C)@1; Propionamide(C)@7	missed R-F@11	2277.01	760.011	2277.06	760.028	3
68	P2rx3	99	DTAIESSVVTK			1148.53	575.273	1148.59	575.304	2
68	P2rx3	99	FAGQDFAK			882.398	442.206	882.424	442.219	2
68	P2rx3	99	FDVLVYGNAGK			1181.55	591.784	1181.61	591.811	2
68	P2rx3	78.74	FDVLVYGNAGK	Deamidated(N)@8		1182.52	592.27	1182.59	592.303	2
68	P2rx3	99	FEEVTETTLK			1195.56	598.788	1195.6	598.806	2
68	P2rx3	81.7	FHPEKAPFCPILR	Propionamide(C)@9	missed K-A@5	1624.88	542.635	1624.85	542.626	3
68	P2rx3	99	FPGGGILTGR			973.506	487.76	973.534	487.775	2
68	P2rx3	99	FPLFNFEK			1040.48	521.246	1040.53	521.274	2
68	P2rx3	99	GNLLPNLTDK			1083.56	542.79	1083.59	542.803	2
68	P2rx3	99	GNLLPNLTDKDIK			1439.73	720.871	1439.8	720.906	2
68	P2rx3	98.9	GNLLPNLTDKDIK			1439.78	480.935	1439.8	480.94	3
68	P2rx3	98.08	GNLLPNLTDKDIK	Deamidated(N)@2		1440.71	721.363	1440.78	721.398	2
68	P2rx3	99	GNLLPNLTDKDIKK		missed K-K@13	1568.81	785.41	1567.89	784.954	2
68	P2rx3	86.66	GNLLPNLTDKDIKK		missed K-K@13	1567.88	523.632	1567.89	523.638	3
68	P2rx3	58.38	GNLLPNLTDKDIKK	Deamidated(N)@6	missed K-K@13	1567.9	523.641	1568.88	523.966	3
68	P2rx3	99	GTASTNPVFTSDQATVEK			1851.79	926.903	1851.89	926.95	2
68	P2rx3	70.8	GTASTNPVFTSDQATVEK			1852.85	618.623	1851.89	618.302	3
68	P2rx3	99	IGWVCDLDK	Propionamide(C)@5		1118.51	560.26	1118.54	560.279	2
68	P2rx3	99	KFEEVTETTLK		missed K-F@1	1323.64	662.828	1323.69	662.853	2
68	P2rx3	60.84	KFEEVTETTLKGTASTNPVFTSDQATVEK		missed K-F@1; missed K-G@11	3157.44	790.368	3157.57	790.399	4
68	P2rx3	99	MENGSEYR	Oxidation(M)@1; Deamidated(N)@3		1001.35	501.682	1001.38	501.695	2
68	P2rx3	82.21	MENGSEYR	Deamidated(N)@3		985.405	493.71	985.381	493.698	2
68	P2rx3	99	MIVTENQMQGFCPENEEK	Oxidation(M)@8; Propionamide(C)@12		2212.88	738.633	2212.94	738.655	3
68	P2rx3	98.78	MIVTENQMQGFCPENEEK	Oxidation(M)@1; Propionamide(C)@12		2212.88	738.633	2212.94	738.655	3
68	P2rx3	73.12	MIVTENQMQGFCPENEEK	Propionamide(C)@12		2196.87	733.298	2196.95	733.324	3
68	P2rx3	99	MIVTENQMQGFCPENEEKYR	Deamidated(N)@6; Propionamide(C)@12	missed K-Y@18	2516.07	839.699	2517.1	840.04	3
68	P2rx3	86.41	MIVTENQMQGFCPENEEKYR	Propionamide(C)@12; Deamidated(N)@15	missed K-Y@18	2516.95	839.991	2517.1	840.04	3
68	P2rx3	86.03	MIVTENQMQGFCPENEEKYR	Oxidation(M)@8; Propionamide(C)@12; Deamidated(N)@15	missed K-Y@18	2532	845.007	2533.09	845.371	3
68	P2rx3	81.94	MIVTENQMQGFCPENEEKYR	Oxidation(M)@1; Propionamide(C)@12	missed K-Y@18	2532.05	845.024	2532.11	845.043	3
68	P2rx3	56.27	MIVTENQMQGFCPENEEKYR	Oxidation(M)@1; Deamidated(N)@6; Propionamide(C)@12	missed K-Y@18	2532.04	845.022	2533.09	845.371	3
68	P2rx3	99	MNCISDFFTYETTK	Oxidation(M)@1; Propionamide(C)@3		1785.66	893.836	1785.76	893.887	2
68	P2rx3	82.79	MNCISDFFTYETTK	Oxidation(M)@1; Propionamide(C)@3		1785.65	596.224	1785.76	596.26	3
68	P2rx3	99	NSIRFPLFNFEK		missed R-F@4	1510.84	504.621	1510.79	504.605	3
68	P2rx3	55.68	NSIRFPLFNFEK	Deamidated(N)@9	missed R-F@4	1511.73	756.872	1511.78	756.896	2
68	P2rx3	99	QSTDSGAYSIGH	Gln->pyro-Glu@N-term		1204.41	603.21	1204.5	603.257	2
68	P2rx3	99	QSTDSGAYSIGH			1221.5	611.758	1221.53	611.77	2
68	P2rx3	92.71	SSVSPGYNFR	Deamidated(N)@8		1113.46	557.735	1113.51	557.762	2
68	P2rx3	70.91	SSVSPGYNFR			1112.47	557.244	1112.53	557.27	2
68	P2rx3	92.36	SWTIGIINR			1058.54	530.277	1058.59	530.301	2
68	P2rx3	67.88	VMDVSDYVTPPQGTSVFVIITK			2395.1	799.374	2395.23	799.419	3
69	P2rx4	99	AAENFTLLVK			1104.46	553.236	1104.62	553.316	2
69	P2rx4	66.7	AAENFTLLVK	Deamidated(N)@4		1105.46	553.736	1105.6	553.808	2
69	P2rx4	99	AASHCLPR	Propionamide(C)@5		924.467	463.241	924.46	463.237	2
69	P2rx4	99	AFLFEYDTPR			1257.35	629.684	1257.6	629.809	2
69	P2rx4	99	AKGVAVTNTSQLGFR		missed K-G@2	1547.82	516.946	1547.84	516.955	3
69	P2rx4	90.09	CVPFNASVK	Propionamide(C)@1		1034.45	518.231	1034.52	518.268	2
69	P2rx4	85.51	CVPFNASVK	Propionamide(C)@1; Deamidated(N)@5		1035.39	518.701	1035.51	518.76	2
69	P2rx4	98.94	DLAGNEQR			901.436	451.725	901.425	451.72	2
69	P2rx4	77.9	DLAGNEQR	Deamidated(N)@5		902.418	452.216	902.409	452.212	2
69	P2rx4	99	DLEHNVSPGYNFR			1546.31	774.163	1546.72	774.365	2
69	P2rx4	99	DLEHNVSPGYNFR			1546.6	516.539	1546.72	516.579	3
69	P2rx4	98.57	DLEHNVSPGYNFR	Deamidated(N)@5		1547.57	516.863	1547.7	516.907	3
69	P2rx4	93.38	DLEHNVSPGYNFR	Deamidated(N)@5		1547.29	774.653	1547.7	774.857	2
69	P2rx4	93.02	DLEHNVSPGYNFR	Deamidated(N)@11		1547.6	516.874	1547.7	516.907	3
69	P2rx4	99	FDIIVFGK			937.5	469.757	937.527	469.771	2
69	P2rx4	99	GVAVTNTSQLGFR			1348.39	675.204	1348.71	675.362	2
69	P2rx4	98.45	GVAVTNTSQLGFR	Deamidated(N)@6		1350.37	676.191	1349.69	675.854	2
69	P2rx4	99	GYQETDSVVSSVTTK			1599.62	534.213	1599.76	534.262	3
69	P2rx4	84.45	GYQETDSVVSSVTTK			1599.33	800.671	1599.76	800.889	2
69	P2rx4	99	MAGCCSVLR	Oxidation(M)@1; Propionamide(C)@4; Propionamide(C)@5		1096.35	549.184	1096.48	549.249	2
69	P2rx4	98.54	NILPNITTSYLK			1375.43	688.723	1375.77	688.893	2
69	P2rx4	98.82	NNIWYPK			933.458	467.736	933.471	467.743	2
69	P2rx4	70.69	NNIWYPK	Deamidated(N)@1		934.502	468.258	934.455	468.235	2
69	P2rx4	99	RNILPNITTSYLK		missed R-N@1	1531.77	511.597	1531.87	511.631	3
69	P2rx4	94.93	RNILPNITTSYLK		missed R-N@1	1531.44	766.73	1531.87	766.943	2
[truncated: 5,327 more rows]

## Sheet: Table S3
Table S3. Sequence coverage (%) of transmembrane proteins (TMPs) by trypsin and chymotrypsin.
G-protein coupled receptors (101)
Symbol	Full Sequence Coverage (%)			Domain Coverage (Tryptic Digests)					Domain Coverage (Chymotryptic Digests)
	Tryptic Digests	Chymotryptic Digests	Overlap (Trypsin vs Chymotrypsin)	N-terminal Extracellular	Helical	Cytoplasmic	Extracellular	C-terminal Cytoplasmic	N-terminal Extracellular	Helical	Cytoplasmic	Extracellular	C-terminal Cytoplasmic
Gpr146	24.6246	20.4204	1.2012	0	12.2449	46.2687	27.4194	45.7143	40.9091	23.8095	5.97015	20.9677	20
Ccr9	12.4661	13.0081	5.96206	0	4.29448	20.9302	0	63.8298	18.3673	8.58896	0	0	53.1915
Cxcr6	19.0883	25.641	12.5356	53.6585	7.87879	0	0	65.3061	73.1707	10.9091	34.8837	16.9811	36.7347
Htr1a	18.5273	6.17577	2.85036	0	0	42.7673	28.5714	0	38.8889	0	7.54717	0	0
Gpr35	12.0521	13.6808	3.25733	0	0	41.5094	25.4237	0	0	11.4865	5.66038	37.2881	0
Gpr22	13.6574	10.1852	5.78704	0	0	37.9032	0	19.0476	0	3.40136	28.2258	0	6.34921
Ednrb	23.9819	10.8597	2.48869	31.6832	3.40909	33.3333	69.2308	22.6415	0	9.09091	5	0	54.717
Oprd1	16.129	0	0	73.3333	0	14.5161	0	29.0323	0	0	0	0	0
Galr2	12.1294	29.3801	4.31267	0	14.8649	25	0	8.79121	0	6.75676	20	33.3333	79.1209
Adora1	14.7239	18.4049	5.52147	0	0	38.2353	0	64.7059	0	1.81818	36.7647	51.0204	20.5882
Rho	0	6.89655	0	0	0	0	0	0	0	3.50877	13.2075	14.2857	10.2564
Ptger2	16.5746	20.1657	1.9337	62.5	0	26.6667	0	64.1026	54.1667	13.6095	25.3333	21.8182	15.3846
Gpr56	25.7642	25.4731	6.84134	36.3184	0	13.7255	0	66.6667	34.0796	4.08163	0	21.5686	58.3333
Agtr1b	19.4986	7.24234	4.17827	74.0741	0	16.0714	0	65.0794	0	1.93548	0	13.7931	23.8095
Mrgpre	9.67742	12.2581	8.06452	0	0	0	0	73.1707	0	2.04082	0	0	85.3659
Htr2a	3.39703	22.7176	0	0	0	0	0	18.3908	38.6667	10.6918	10.8911	36.7347	36.7816
Htr1d	0	23.7968	0	0	0	0	0	0	34.2857	4.7619	36.7521	51.3514	41.1765
Chrm1	19.3478	4.34783	0.869565	83.3333	0	29.3194	0	33.3333	0	0.653595	5.75916	15.0943	0
Cckbr	0	8.38852	0	0	0	0	0	0	40.3509	3.37838	8	0	0
Tacr3	13.7168	23.2301	2.43363	18.3099	0	18.6441	21.4286	24.5283	64.7887	5	25.4237	32.1429	16.9811
Sstr4	8.33333	0	0	0	0	15.5172	0	31.5068	0	0	0	0	0
Gpr87	27.3743	8.65922	7.5419	68.0851	3.40136	44.6429	30.8824	37.5	65.9574	0	0	0	0
Gpr4	32.3288	18.9041	7.67123	66.6667	0	33.9286	47.7612	68.9189	0	5.55556	0	40.2985	45.9459
Cx3cr1	7.62712	5.36723	0	0	1.21212	16.2791	18.9655	12.5	0	3.0303	0	8.62069	16.0714
Oxgr1	4.74777	6.23145	0	0	0	0	21.3333	0	26.3158	2.04082	0	0	25
Gprc5d	18.8953	14.2442	5.23256	25.9259	0	0	0	69.0476	40.7407	0	0	17.7778	35.7143
Gpr65	18.9911	11.276	9.19881	0	0	15.2542	66.1972	18.6047	0	2.72109	15.2542	35.2113	0
Gpr114	11.8547	10.7075	2.86807	11.8367	0	14.8936	22.0339	54.1667	11.0204	0	0	16.9492	79.1667
Cnr1	22.1987	9.51374	3.38266	42.735	3.04878	28.5714	9.52381	32.8767	23.9316	7.31707	0	0	6.84932
Ccrl2	9.44444	32.7778	6.11111	0	0	0	0	64.1509	59.5238	16.8919	9.7561	43.4211	58.4906
Cckar	29.8165	4.58716	2.29358	0	0	56.4103	32.7586	81.8182	0	6.06061	0	0	18.1818
Trhr	24.173	18.0662	9.41476	0	0	61.9048	0	58.1081	0	0	23.8095	0	68.9189
Gpr75	30.5556	10.1852	5	0	2.04082	55.3846	33.3333	43.787	19.5652	0	20	14.5833	7.69231
Hcrtr1	23.0769	11.7788	7.21154	0	0	43.299	23.8806	64.4068	0	6.12245	32.9897	0	13.5593
Ntsr2	11.5108	4.79616	0	0	1.96078	29.3478	21.9512	0	21.875	0	0	0	22.4138
Npy6r	7.54717	7.00809	2.15633	38.7097	0	9.52381	0	15.0943	0	0	0	17.8571	30.1887
Gpr174	18.5075	12.5373	9.85075	33.3333	0	32.7273	13.3333	58.6957	0	0	0	16.6667	69.5652
Gpr141	8.52459	0	0	0	0	14.5833	11.2676	64.7059	0	0	0	0	0
Gpr132	14.6597	26.4398	6.02094	0	1.94805	21.5686	20.9677	39.726	69.0476	3.24675	17.6471	50	36.9863
Gpr115	31.8052	5.01433	2.149	47.1883	0	38.7755	0	23.8095	2.20049	0	20.4082	13.7255	21.4286
Gpr55	17.6829	5.18293	3.04878	0	0	42.3077	10.7143	70.3704	0	0	0	12.5	37.037
Gpr18	21.4502	18.429	10.574	84.6154	0	14.5455	37.7049	42.8571	42.3077	2.04082	25.4545	36.0656	26.1905
Gpr3	14.5455	11.2121	3.0303	0	0	34.4262	33.3333	41.9355	0	9.74026	36.0656	0	0
Gcgr	17.5258	16.4948	4.74227	17.4825	0	22.2222	0	62.5	38.4615	2.58065	0	33.871	0
Crhr1	17.1084	20.241	3.37349	28.9256	0	23.913	0	54.3478	28.9256	11.3333	23.913	23.0769	19.5652
Ccr6	15.5313	11.7166	6.81199	0	0	20.9302	21.4286	61.1111	7.69231	6.8323	23.2558	0	35.1852
Ccr5	2.25989	5.08475	0	0	0	0	0	15.6863	0	0	18.1818	16.129	0
Ccr3	7.79944	11.6992	2.22841	23.6842	0	0	18.6441	16	0	8	21.6216	3.38983	36
Avpr1a	29.078	12.5296	8.27423	78.8462	1.98675	50	0	50.7463	26.9231	4.63576	11.1111	14.2857	19.403
Adrb3	22.75	15.5	6.25	19.4444	0	51.0204	26.3158	33.9286	0	4.57516	12.2449	56.1404	19.6429
Xcr1	10.559	4.65839	2.48447	48.1481	0	0	0	53.8462	0	0	0	13.4615	20.5128
Tacr1	15.9705	2.9484	0.2457	0	0	32.2034	0	46.4646	0	0	20.339	0	0
Ppyr1	14.4	9.86667	0.8	46.1538	0	15.7143	12.1212	32.0755	33.3333	4.08163	7.14286	9.09091	13.2075
P2ry14	18.6391	10.355	2.36686	0	0	17.3077	36.6197	71.7949	0	4.08163	0	40.8451	0
P2ry13	16.9139	13.9466	4.74777	48.3871	1.36054	0	56.338	0	41.9355	13.6054	18.8679	5.6338	0
P2ry12	11.8156	24.2075	4.32277	0	4.08163	23.6364	0	56.4103	0	11.5646	29.0909	53.3333	28.2051
P2ry1	20.9115	11.2601	0.536193	0	4.60526	37.2881	41.5385	48.8889	51.9231	0	0	23.0769	0
Npy5r	22.9614	0	0	65.0794	0	32.1637	16.4179	0	0	0	0	0	0
Npy2r	24.9351	11.1688	5.71429	81.8182	0	23.0769	0	64.2857	0	6.12245	24.6154	0	32.1429
Mc2r	10.473	22.973	6.75676	69.5652	0	14.5833	16.3265	0	100	11.3924	6.25	30.6122	50
Htr2b	25.261	17.119	5.84551	67.2727	0	45.2991	32.7273	13.4021	0	3.87097	33.3333	27.2727	22.6804
Hrh1	30.7377	10.041	4.30328	44.8276	1.3986	51.0204	18.5185	0	0	0	17.551	11.1111	0
Gpr150	23.4192	12.6464	3.0445	0	2.72109	24.7934	51.9481	32.9114	0	6.80272	25.6198	16.8831	0
Gpr85	8.10811	9.72973	2.16216	0	0	27.7778	0	0	0	6.12245	13.8889	22.2222	0
Gpr83	17.4941	8.03783	0	15.493	0	0	12.069	74.6667	47.8873	0	0	0	0
Gpr63	9.17647	12.9412	3.76471	0	0	20.8333	0	52.1739	29.8851	0	27.7778	0	19.5652
Gpr45	11.5282	12.0643	4.82574	0	0	14.1176	26.3158	34.7826	34.2105	0	0	19.2982	45.6522
Gpr37	21.8333	9	4.66667	43.254	0	0	29.3333	0	12.6984	0	0	29.3333	0
Gpr34	16.2667	10.1333	9.86667	0	0	13.3333	14.2857	86.2745	0	0	0	11.1111	60.7843
Gpr26	11.8694	14.5401	9.19881	0	7.48299	7.52688	0	55	0	17.6871	0	0	57.5
Gpr20	13.1285	10.6145	0	0	0	18.3333	48.7805	25.3968	26.087	6.08108	0	0	26.9841
Cnr2	17.8674	5.18732	0	54.5455	0	17.1875	0	71.7391	0	3.04878	10.9375	15	0
Ccr7	7.14286	6.61376	1.85185	0	0	0	12.1212	40.4255	0	0	0	37.8788	0
Ccr1	10.4225	14.9296	0	0	0	0	28.8136	40	47.0588	10.2857	21.6216	11.8644	8
Calcr	15.3398	13.2039	0.970874	32.0261	0	25.5319	14.1176	7.22892	18.3007	6.12245	0	36.4706	0
Adra1a	18.2403	4.07725	0	0	0	42.1569	0	30.6569	0	2.99401	0	42.4242	0
P2ry4	31.5789	25.4848	15.5125	100	3.7037	41.0714	50.8772	46.4286	70	11.1111	35.7143	50.8772	7.14286
P2ry2	23.5925	0	0	0	3.75	23.3333	47.3684	64.0625	0	0	0	0	0
Npy1r	18.0628	18.8482	9.1623	24.2424	0	12.1212	20.5479	60.3175	57.5758	2.04082	0	23.2877	52.381
Gpr21	18.9112	18.0516	6.87679	0	10.8844	27.381	0	60	28.125	13.6054	3.57143	43.9024	28.8889
Sstr1	10.9974	12.7877	6.13811	26.7857	0	15.5172	0	29.6875	0	5.81395	20.6897	0	43.75
Hcrtr2	16.3043	21.9565	3.91304	12.963	0	31.5217	19.0476	28.7234	0	8.28025	7.6087	39.6825	59.5745
Gpr101	28.9628	0	0	20	0	44.8598	0	77.5862	0	0	0	0	0
Gpr19	20.241	9.63855	3.13253	0	0	12.5	15.5172	81.9277	0	10.7383	12.5	6.89655	15.6627
Emr1	9.98926	6.87433	0	5.59006	4.16667	40.9091	21.9512	67.6471	9.93789	0	0	0	0
Emr4	21.9158	0	0	27.7143	0	30.5085	0	36.7347	0	0	0	0	0
LPAR3	30.5085	15.8192	8.19209	93.5484	0	30	17.0213	84.7458	35.4839	9.52381	0	19.1489	37.2881
S1PR4	17.6166	12.6943	6.47668	60.7143	6.96203	2.38095	0	56.7164	0	18.3544	1.19048	0	28.3582
S1PR2	15.9091	13.3523	6.25	97.0588	0	32.6531	15.2174	0	29.4118	7.97546	42.8571	6.52174	0
Lpar2	20.6897	21.5517	7.47126	0	0	44.1176	14.8936	61.4035	30	14.3836	0	31.9149	52.6316
CCR10	5.52486	0	0	16.6667	0	0	18.4615	0	0	0	0	0	0
LPAR1	13.1868	10.989	7.14286	22	0.613497	13.7931	0	57.1429	14	2.45399	0	0	59.1837
CCRL1	0	7.14286	0	0	0	0	0	0	4.87805	8.10811	5.55556	0	20
Calcrl	0	3.02376	0	0	0	0	0	0	9.65517	0	0	0	0
Agtr2	15.427	5.50964	1.92837	26.6667	4.4586	23.5294	24.6154	20	28.8889	0	13.7255	0	0
Chrm3	23.4295	20.7131	5.26316	0	0	44.6886	0	37.2093	75.7576	5.19481	15.7509	0	48.8372
Gpr160	5.65476	8.92857	0	0	0	0	0	44.186	45	0	12.6761	0	27.907
Mas1	11.7284	3.08642	0	57.1429	0	0	0	43.9024	0	6.36943	0	0	0
Lpar4	18.1081	4.86486	0	39.5349	0	36.0656	43.75	0	0	3.40136	0	9.375	12.7273
S1pr1	20.6806	15.7068	11.7801	67.3913	0	0	34.7826	47.7612	63.0435	4.90798	3.33333	23.913	14.9254
P2ry6	26.2195	13.4146	5.79268	77.7778	2.68456	21.0526	57.1429	36	0	10.0671	0	34.2857	20
Average	16.3734	11.8927	3.82359	23.8917	1.16004	22.0669	15.4851	38.9491	18.4875	4.79645	10.0331	15.68	22.0048
GABA receptors
Symbol	Full Sequence Coverage (%)			Domain Coverage (Tryptic Digests)					Domain Coverage (Chymotryptic Digests)
	Tryptic Digests	Chymotryptic Digests	Overlap (Trypsin vs Chymotrypsin)	N-terminal Extracellular	Helical	Cytoplasmic	Extracellular	C-terminal Extracellular	N-terminal Extracellular	Helical	Cytoplasmic	Extracellular	C-terminal Extracellular
Gabra3	46.3415	25.4065	10.5691	55.4348	0	72.8155	0	0	32.971	20.4545	15.534	0	0
Gabrb2	27.7344	21.6797	3.90625	37.2951	0	30.7229	0	0	23.7705	43.3333	1.80723	100	0
Gabra2	34.1463	35.4767	16.6297	43.8247	0	48.8889	0	0	35.4582	21.5909	46.6667	0	100
Average	36.0741	27.521	10.3684	45.5182	0	50.8091	0	0	30.7332	28.4596	21.336	33.3333	33.3333
TRP channels
Symbol	Full Sequence Coverage (%)			Domain Coverage (Tryptic Digests)					Domain Coverage (Chymotryptic Digests)
	Tryptic Digests	Chymotryptic Digests	Overlap (Trypsin vs Chymotrypsin)	N-terminal Cytoplasmic	Helical	Cytoplasmic	Extracellular	C-terminal Cytoplasmic	N-terminal Cytoplasmic	Helical	Cytoplasmic	Extracellular	C-terminal Cytoplasmic
Trpc3	33.0144	36.6029	16.7464	43.3234	0	1.05319	0	67.9775	48.0712	9.52381	46.8085	8.47458	44.382
TrpV4	21.814	15.2698	3.67394	29.6774	1.5873	0	6.57895	28.125	11.3978	2.38095	9.09091	13.1579	39.375
Trpc6	31.1828	21.7204	11.2903	29.7483	0	0	26.7717	61.7647	27.2311	5.55556	0	29.9213	18.6275
Average	28.6704	24.531	10.5702	34.2497	0.529101	0.351064	11.1169	52.6224	28.9001	5.82011	18.6331	17.1846	34.1282
TNF
Symbol	Full Sequence Coverage (%)			Domain Coverage (Tryptic Digests)			Domain Coverage (Chymotryptic Digests)
	Tryptic Digests	Chymotryptic Digests	Overlap (Trypsin vs Chymotrypsin)	N-terminal Cytoplasmic	Helical	C-terminal Extracellular	N-terminal Cytoplasmic	Helical	C-terminal Extracellular
Tnfsf11	36.7089	49.3671	27.2152	0	0	46.9636	4.16667	85.7143	55.0607
Tnfsf9	26.8608	37.2168	3.55987	54.878	0	18.4466	13.4146	0	50.4854
Tnfsf8	34.3096	22.1757	12.9707	74.4186	0	29.0698	0	0	30.814
Average	32.6264	36.2532	14.5819	43.0989	0	31.4933	5.86043	28.5714	45.4534

## Sheet: Table S4
Table S4. Selected reaction monitoring (SRM) profiles of transmembrane protein (TMP) peptides.
(a) Tryptic Peptides
Symbol	Peptide Sequence	Charge/Ion	Q1	Q3	Collision Energy
Adam2	C[PPa]QC[PPa]GVPVC[PPa]VMNPEAPHSSGVR	3/b5	795.03	633.25	43.752
Adam2	C[PPa]QC[PPa]GVPVC[PPa]VMNPEAPHSSGVR	3/y16(2)	795.03	875.92	44
Adam2	C[PPa]QC[PPa]GVPVC[PPa]VMNPEAPHSSGVR	3/y7	795.03	739.38	43.752
Adam2	C[PPa]QC[PPa]GVPVC[PPa]VMNPEAPHSSGVR	3/y8	795.03	810.42	44
Adam2	C[PPa]QC[PPa]GVPVC[PPa]VMNPEAPHSSGVR	3/y9	795.03	939.46	44
Adam2	C[PPa]VADTFLGYDC[PPa]NLEK	2/b7	916.91	821.39	45.344
Adam2	C[PPa]VADTFLGYDC[PPa]NLEK	2/y6	916.91	792.36	45.344
Adam2	C[PPa]VADTFLGYDC[PPa]NLEK	2/y7	916.91	955.42	45
Adam2	FITSQSSHC[PPa]LQNQPR	3/y5	606.3	642.33	34
Adam2	FITSQSSHC[PPa]LQNQPR	3/y6	606.3	755.42	34
Adam2	FITSQSSHC[PPa]LQNQPR	3/y7	606.3	929.46	34
Adam2	GGALLYAEK	2/y4	461.26	510.26	25
Adam2	GGALLYAEK	2/y5	461.26	623.34	25
Adam2	GGALLYAEK	2/y6	461.26	736.42	25
Adam2	ILTTGDANK	2/y6	466.76	605.29	26
Adam2	ILTTGDANK	2/y7	466.76	706.34	26
Adam2	LHVQVTVPEK	2/b7	575.33	777.46	30
Adam2	LHVQVTVPEK	2/y7	575.33	800.45	30
Adam2	LHVQVTVPEK	2/y8	575.33	899.52	30
Adam2	LSDGSEC[PPa]SSGIC[PPa]C[PPa]NSC[PPa]K	2/b10	988.89	994.38	49
Adam2	LSDGSEC[PPa]SSGIC[PPa]C[PPa]NSC[PPa]K	2/b7	988.89	763.29	48.511
Adam2	LSDGSEC[PPa]SSGIC[PPa]C[PPa]NSC[PPa]K	2/y5	988.89	696.28	48.511
Adam2	LSDGSEC[PPa]SSGIC[PPa]C[PPa]NSC[PPa]K	2/y6	988.89	870.33	48.511
Adam2	NTTDYVGATYQGK	2/y7	709.33	724.36	36
Adam2	NTTDYVGATYQGK	2/y8	709.33	823.43	36
Adam2	NTTDYVGATYQGK	2/y9	709.33	986.49	36
Adam2	SDISGSC[PPa]GISAGGYK	2/b9	736.84	891.39	37
Adam2	SDISGSC[PPa]GISAGGYK	2/y6	736.84	582.29	37.421
Adam2	SDISGSC[PPa]GISAGGYK	2/y8	736.84	752.39	37
Adam2	SDISGSC[PPa]GISAGGYK	2/y9	736.84	926.44	37
Adam2	SVTSNGYETQVTYNLK	2/y8	902.44	966.53	45
Adam2	SVTSNGYETQVTYNLK	3/y5	601.96	638.35	34
Adam2	SVTSNGYETQVTYNLK	3/y6	601.96	737.42	34
Adam2	SVTSNGYETQVTYNLK	3/y7	601.96	865.48	34.098
Adam7	APYATNHSC[PPa]VGLNFTK	2/y13(2)	897.44	732.11	44.487
Adam7	APYATNHSC[PPa]VGLNFTK	2/y14(2)	897.44	813.68	44.487
Adam7	APYATNHSC[PPa]VGLNFTK	2/y8	897.44	952.49	44
Adam7	APYATNHSC[PPa]VGLNFTKK	3/y13(2)	641.32	760.39	36
Adam7	APYATNHSC[PPa]VGLNFTKK	3/y14(2)	641.32	795.91	36
Adam7	APYATNHSC[PPa]VGLNFTKK	3/y7	641.32	807.47	36
Adam7	EFLSSNYSETYYNVK	2/b7	922.42	841.37	45.587
Adam7	EFLSSNYSETYYNVK	2/f687	922.42	687.29	45.587
Adam7	EFLSSNYSETYYNVK	2/y6	922.42	787.4	45.587
Adam7	FIELFVVADEYVYR	2/y7	881.96	915.42	44
Adam7	FIELFVVADEYVYR	3/y4	588.31	600.31	33
Adam7	FIELFVVADEYVYR	3/y6	588.31	844.38	33.415
Adam7	FIELFVVADEYVYR	3/y7	588.31	915.42	33
Adam7	GIVGVEGQELVHPK	3/y11(2)	487.94	596.82	28
Adam7	GIVGVEGQELVHPK	3/y6	487.94	722.42	28
Adam7	GIVGVEGQELVHPK	3/y8	487.94	907.5	28
Adam7	KLPLLHK	2/b6	424.79	702.47	24
Adam7	KLPLLHK	2/y5	424.79	607.39	24
Adam7	KLPLLHK	2/y6	424.79	720.48	24
Adam7	KSALIDVENIEEHNAEDHHK	3/y16(2)	776.71	965.12	42.836
Adam7	KSALIDVENIEEHNAEDHHK	3/y7	776.71	850.38	43
Adam7	KSALIDVENIEEHNAEDHHK	4/b6	582.79	628.37	32
Adam7	KSALIDVENIEEHNAEDHHK	4/y12(2)	582.79	736.83	32
Adam7	KSALIDVENIEEHNAEDHHKEK	4/b7	647.07	727.43	35
Adam7	KSALIDVENIEEHNAEDHHKEK	4/b8	647.07	856.48	35
Adam7	KSALIDVENIEEHNAEDHHKEK	4/b9	647.07	970.52	35
Adam7	KTLILHLLK	2/b8	539.87	932.63	29
Adam7	KTLILHLLK	2/y7	539.87	849.59	29
Adam7	KTLILHLLK	2/y8	539.87	950.64	29
Adam7	SALIDVENIEEHNAEDHHKEK	3/y14(2)	819.73	865.4	45
Adam7	SALIDVENIEEHNAEDHHKEK	3/y15(2)	819.73	929.92	45
Adam7	SALIDVENIEEHNAEDHHKEK	3/y16(2)	819.73	979.45	45
Adam7	TLILHLLK	2/y4	475.82	510.34	26
Adam7	TLILHLLK	2/y5	475.82	623.42	26
Adam7	TLILHLLK	2/y6	475.82	736.51	26
Adam7	YLIEPVK	2/y4	431.26	472.28	24
Adam7	YLIEPVK	2/y5	431.26	585.36	24
Adam7	YLIEPVK	2/y6	431.26	698.44	24
Adam7	YSDDGEHLVYK	2/b8	663.3	917.36	34
Adam7	YSDDGEHLVYK	2/y7	663.3	845.45	34
Adam7	YSDDGEHLVYK	2/y8	663.3	960.48	34
Adam8	C[PPa]GALYC[PPa]EGGQKPLER	3/b14(2)	589.28	796.37	33
Adam8	C[PPa]GALYC[PPa]EGGQKPLER	3/y11(2)	589.28	675.83	33
Adam8	C[PPa]GALYC[PPa]EGGQKPLER	3/y12(2)	589.28	732.37	33
Adam8	C[PPa]NNHGVC[PPa]NHK	2/b6	634.27	696.29	33
Adam8	C[PPa]NNHGVC[PPa]NHK	2/y6	634.27	728.35	33
Adam8	C[PPa]NNHGVC[PPa]NHK	2/y7	634.27	865.41	33
Adam8	DKC[PPa]DLEEFC[PPa]DGR	3/b4	524.55	533.2	30
Adam8	DKC[PPa]DLEEFC[PPa]DGR	3/y5	524.55	668.28	30
Adam8	DKC[PPa]DLEEFC[PPa]DGR	3/y6	524.55	797.32	30
Adam8	DKFYISR	2/b4	464.75	554.26	25
Adam8	DKFYISR	2/y4	464.75	538.3	25
Adam8	DKFYISR	2/y5	464.75	685.37	25
Adam8	DLWGPGAR	2/b4	436.22	472.22	24
Adam8	DLWGPGAR	2/y5	436.22	457.25	24
Adam8	DLWGPGAR	2/y6	436.22	643.33	24
Adam8	DTNLNDLGPR	2/y6	557.78	671.35	30
Adam8	DTNLNDLGPR	2/y7	557.78	784.43	30
Adam8	DTNLNDLGPR	2/y8	557.78	898.47	30
Adam8	GWAPPNC[PPa]VQR	2/y6	599.79	787.39	31
Adam8	GWAPPNC[PPa]VQR	2/y7	599.79	884.44	31
Adam8	GWAPPNC[PPa]VQR	2/y8	599.79	955.48	31
Adam8	HSGAVNQDHSK	2/b8	590.28	809.35	31
Adam8	HSGAVNQDHSK	2/y6	590.28	728.33	31
Adam8	HSGAVNQDHSK	2/y9	590.28	955.46	31
Adam8	IDLESFVTKPQTGC[PPa]LTNVPDVNR	3/y16(2)	873.11	907.46	48
Adam8	IDLESFVTKPQTGC[PPa]LTNVPDVNR	3/y5	873.11	600.31	47.656
Adam8	IDLESFVTKPQTGC[PPa]LTNVPDVNR	3/y7	873.11	813.42	47.656
Adam8	IDLESFVTKPQTGC[PPa]LTNVPDVNR	3/y8	873.11	914.47	48
Adam8	IPNQFRPDPPTKPLPELKPK	3/b16(2)	771.44	914.49	43
Adam8	IPNQFRPDPPTKPLPELKPK	3/b8	771.44	968.49	43
Adam8	IPNQFRPDPPTKPLPELKPK	3/y8	771.44	921.58	43
Adam8	LYQELSFR	2/y5	528.28	651.35	28
Adam8	LYQELSFR	2/y6	528.28	779.4	28
Adam8	LYQELSFR	2/y7	528.28	942.47	28
Adam8	NRPPDPSETVSTN[Dea]QPPRPIVKPK	4/b8	639.59	893.41	35
Adam8	NRPPDPSETVSTN[Dea]QPPRPIVKPK	4/y12(2)	639.59	688.41	35
Adam8	NRPPDPSETVSTN[Dea]QPPRPIVKPK	4/y13(2)	639.59	731.92	35
Adam8	NRPPDPSETVSTNQPPRPIVKPK	3/b5	852.13	580.28	46.606
Adam8	NRPPDPSETVSTNQPPRPIVKPK	3/b8	852.13	893.41	47
Adam8	NRPPDPSETVSTNQPPRPIVKPK	3/b9	852.13	994.46	47
Adam8	NRPPDPSETVSTNQPPRPIVKPK	3/y8	852.13	934.62	47
Adam8	RPPPAPPGAVSSSPLPVPVYAPK	3/b10	761.09	940.54	42
Adam8	RPPPAPPGAVSSSPLPVPVYAPK	3/b9	761.09	841.47	42
Adam8	RPPPAPPGAVSSSPLPVPVYAPK	3/y8	761.09	870.51	42
Adam8	SVAPKPISGLSNPLFYTR	3/b9	649.69	837.48	36
Adam8	SVAPKPISGLSNPLFYTR	3/y5	649.69	699.38	36
Adam8	SVAPKPISGLSNPLFYTR	3/y6	649.69	796.44	36
Adam8	VALKVPIQK	2/y5	498.33	584.38	27
Adam8	VALKVPIQK	2/y6	498.33	712.47	27
Adam8	VALKVPIQK	2/y7	498.33	825.56	27
Adam8	VLEVVNHVDK	2/y6	576.32	711.38	30
Adam8	VLEVVNHVDK	2/y7	576.32	810.45	30
Adam8	VLEVVNHVDK	2/y8	576.32	939.49	30
Adam9	ALSPLASLR	2/y5	464.28	559.36	25
Adam9	ALSPLASLR	2/y6	464.28	656.41	25
Adam9	ALSPLASLR	2/y7	464.28	743.44	25
Adam9	C[PPa]ATGNALC[PPa]GK	2/y7	540.25	733.37	29
Adam9	C[PPa]ATGNALC[PPa]GK	2/y8	540.25	834.41	29
Adam9	C[PPa]ATGNALC[PPa]GK	2/y9	540.25	905.45	29
Adam9	C[PPa]HGHGVC[PPa]NSNK	2/y7	649.28	792.37	34
Adam9	C[PPa]HGHGVC[PPa]NSNK	2/y9	649.28	986.45	34
Adam9	C[PPa]HGHGVC[PPa]NSNK	3/y5	433.19	636.28	26
Adam9	DC[PPa]FIEVNSK	2/y5	563.27	576.3	30
Adam9	DC[PPa]FIEVNSK	2/y6	563.27	689.38	30
Adam9	DC[PPa]FIEVNSK	2/y7	563.27	836.45	30
Adam9	EALGPSSQQISYVIQAQGK	3/b9	668.68	898.43	37
Adam9	EALGPSSQQISYVIQAQGK	3/y6	668.68	644.37	37.434
Adam9	EALGPSSQQISYVIQAQGK	3/y7	668.68	743.44	37
Adam9	EALGPSSQQISYVIQAQGK	3/y9	668.68	993.54	37
Adam9	EKFLITR	2/b4	453.77	518.3	25
Adam9	EKFLITR	2/y3	453.77	389.25	24.966
Adam9	EKFLITR	2/y4	453.77	502.33	25
Adam9	EKFLITR	2/y5	453.77	649.4	25
Adam9	FGNC[PPa]GFSGSEYKK	3/b12(2)	498.89	674.78	29
Adam9	FGNC[PPa]GFSGSEYKK	3/y5	498.89	654.35	28.945
Adam9	FGNC[PPa]GFSGSEYKK	3/y6	498.89	711.37	29
Adam9	FGNC[PPa]GFSGSEYKK	3/y7	498.89	798.4	29
Adam9	FPVPTYAAK	2/y6	497.27	650.35	27
Adam9	FPVPTYAAK	2/y7	497.27	749.42	27
Adam9	FPVPTYAAK	2/y8	497.27	846.47	27
Adam9	GYGGSVDSGPTYNAK	2/y7	736.84	750.38	37
Adam9	GYGGSVDSGPTYNAK	2/y8	736.84	837.41	37
Adam9	GYGGSVDSGPTYNAK	2/y9	736.84	952.44	37
Adam9	HDSAQLVLK	2/b7	505.79	751.37	27
Adam9	HDSAQLVLK	2/y7	505.79	758.48	27
Adam9	HDSAQLVLK	2/y8	505.79	873.5	27
Adam9	HDSAQLVLKK	2/b7	569.83	751.37	30
Adam9	HDSAQLVLKK	2/b8	569.83	864.46	30
Adam9	HDSAQLVLKK	2/y8	569.83	886.57	30
Adam9	LVDPGEEC[PPa]DC[PPa]GTAK	3/y5	526.9	550.27	30
Adam9	LVDPGEEC[PPa]DC[PPa]GTAK	3/y6	526.9	665.29	30
Adam9	LVDPGEEC[PPa]DC[PPa]GTAK	3/y7	526.9	839.34	30
Adam9	NFSSC[PPa]SAEDFEK	2/y6	717.8	738.33	37
Adam9	NFSSC[PPa]SAEDFEK	2/y7	717.8	825.36	37
Adam9	NFSSC[PPa]SAEDFEK	2/y8	717.8	999.41	37
Adam9	NTDLLPNDFVVYTYDK	2/b4	958.97	444.21	47.195
Adam9	NTDLLPNDFVVYTYDK	2/b5	958.97	557.29	47.195
Adam9	NTDLLPNDFVVYTYDK	2/y5	958.97	689.31	47.195
Adam9	NTDLLPNDFVVYTYDK	2/y6	958.97	788.38	47.195
Adam9	REALGPSSQQISYVIQAQGK	3/b8	720.72	798.41	40
Adam9	REALGPSSQQISYVIQAQGK	3/y6	720.72	644.37	40.036
Adam9	REALGPSSQQISYVIQAQGK	3/y8	720.72	906.5	40
Adam9	REALGPSSQQISYVIQAQGK	3/y9	720.72	993.54	40
Adam9	SFAEC[PPa]AYGDC[PPa]C[PPa]K	2/y6	755.29	830.32	38
Adam9	SFAEC[PPa]AYGDC[PPa]C[PPa]K	2/y7	755.29	901.35	38
Adam9	SFAEC[PPa]AYGDC[PPa]C[PPa]K	3/y5	503.86	667.25	29
Adam9	YVELFIVVDKER	2/y5	755.42	646.35	38.238
Adam9	YVELFIVVDKER	2/y6	755.42	745.42	38.238
Adam9	YVELFIVVDKER	2/y7	755.42	858.5	38
Adam15	AGPDLLLEQHHAHR	3/y10(2)	531.95	627.35	31
Adam15	AGPDLLLEQHHAHR	3/y11(2)	531.95	684.86	31
Adam15	AGPDLLLEQHHAHR	3/y9(2)	531.95	570.8	31
Adam15	APQSC[PPa]PPERPGPPQR	3/b7	563.28	752.34	32
Adam15	APQSC[PPa]PPERPGPPQR	3/y12(2)	563.28	696.35	32
Adam15	APQSC[PPa]PPERPGPPQR	3/y6	563.28	651.36	32
Adam15	C[PPa]HGHGVC[PPa]DSSGHC[PPa]R	3/y5	556.56	630.28	32
Adam15	C[PPa]HGHGVC[PPa]DSSGHC[PPa]R	3/y6	556.56	717.31	32
Adam15	C[PPa]HGHGVC[PPa]DSSGHC[PPa]R	3/y7	556.56	832.34	32
Adam15	C[PPa]QPVDLLGAQEC[PPa]R	3/b6	525.25	727.34	30
Adam15	C[PPa]QPVDLLGAQEC[PPa]R	3/y4	525.25	606.27	30
Adam15	C[PPa]QPVDLLGAQEC[PPa]R	3/y6	525.25	734.32	30
Adam15	GLIVLSPER	2/y5	492.3	601.33	27
Adam15	GLIVLSPER	2/y6	492.3	700.4	27
Adam15	GLIVLSPER	2/y7	492.3	813.48	27
Adam15	GNAFGSC[PPa]GR	2/y5	470.21	550.24	26
Adam15	GNAFGSC[PPa]GR	2/y6	470.21	697.31	26
Adam15	GNAFGSC[PPa]GR	2/y7	470.21	768.35	26
Adam15	IVELVIVADNSEVR	2/y6	778.44	719.33	39.251
Adam15	IVELVIVADNSEVR	2/y7	778.44	790.37	39
Adam15	IVELVIVADNSEVR	2/y8	778.44	889.44	39
Adam15	KC[PPa]HGHGVC[PPa]DSSGHC[PPa]R	3/b5	599.26	634.29	34
Adam15	KC[PPa]HGHGVC[PPa]DSSGHC[PPa]R	3/y6	599.26	717.31	34
Adam15	KC[PPa]HGHGVC[PPa]DSSGHC[PPa]R	3/y7	599.26	832.34	34
Adam15	KLQAALADR	2/y6	493.29	616.34	27
Adam15	KLQAALADR	2/y7	493.29	744.4	27
Adam15	KLQAALADR	2/y8	493.29	857.48	27
Adam15	LQAALADR	2/y4	429.25	474.27	24
Adam15	LQAALADR	2/y5	429.25	545.3	24
Adam15	LQAALADR	2/y6	429.25	616.34	24
Adam15	SQGPTKPPPPR	2/b6	581.32	599.31	31
Adam15	SQGPTKPPPPR	2/y8	581.32	889.53	31
Adam15	SQGPTKPPPPR	2/y9	581.32	946.55	31
Adam15	SQPLLGSVQDR	2/y6	600.32	661.33	31
Adam15	SQPLLGSVQDR	2/y7	600.32	774.41	31
Adam15	SQPLLGSVQDR	2/y9	600.32	984.55	31
Adam15	YPDFQQLLNR	2/b6	647.33	779.34	33
Adam15	YPDFQQLLNR	2/y6	647.33	771.45	33
Adam15	YPDFQQLLNR	2/y7	647.33	918.52	33
Adam18	C[PPa]QALNDQC[PPa]VSLFGK	2/b7	834.4	844.36	42
Adam18	C[PPa]QALNDQC[PPa]VSLFGK	2/y8	834.4	952.49	42
Adam18	EC[PPa]C[PPa]DHETC[PPa]R	2/b6	654.74	859.27	34
Adam18	EC[PPa]C[PPa]DHETC[PPa]R	2/y5	654.74	716.31	34
Adam18	EC[PPa]C[PPa]DHETC[PPa]R	2/y6	654.74	831.34	34
Adam18	ENLANC[PPa]DSK	2/y5	532.74	637.26	28
Adam18	ENLANC[PPa]DSK	2/y6	532.74	708.3	28
Adam18	ENLANC[PPa]DSK	2/y7	532.74	821.38	28
Adam18	EVNFTGNDC[PPa]NATK	2/y7	742.33	836.36	38
Adam18	EVNFTGNDC[PPa]NATK	2/y8	742.33	893.38	38
Adam18	EVNFTGNDC[PPa]NATK	2/y9	742.33	994.43	38
Adam18	FEHIVYQVK	2/y5	581.82	636.37	31
Adam18	FEHIVYQVK	2/y6	581.82	749.46	31
Adam18	FEHIVYQVK	2/y7	581.82	886.51	31
Adam18	GHFNEQDK	2/b7	487.72	828.33	26
Adam18	GHFNEQDK	2/y5	487.72	633.28	26
Adam18	GHFNEQDK	2/y6	487.72	780.35	26
Adam18	GHFNEQDKNHSQLLPQSLK	4/b13(2)	555.78	768.35	31
Adam18	GHFNEQDKNHSQLLPQSLK	4/y5	555.78	572.34	31
Adam18	GHFNEQDKNHSQLLPQSLK	4/y6	555.78	685.42	31
Adam18	GSQGASYAC[PPa]FEK	2/y5	659.79	668.31	34
Adam18	GSQGASYAC[PPa]FEK	2/y6	659.79	831.37	34
Adam18	GSQGASYAC[PPa]FEK	2/y7	659.79	918.4	34
Adam18	LAC[PPa]FRPPK	2/y5	501.78	644.39	27
Adam18	LAC[PPa]FRPPK	2/y6	501.78	818.43	27
Adam18	LAC[PPa]FRPPK	2/y7	501.78	889.47	27
Adam18	LGSAYC[PPa]YNGR	2/y5	587.77	683.29	31
Adam18	LGSAYC[PPa]YNGR	2/y6	587.77	846.36	31
Adam18	LGSAYC[PPa]YNGR	2/y7	587.77	917.39	31
Adam18	NHISTDGNATDILQR	2/b6	827.91	668.3	41.428
Adam18	TESAFATK	2/y5	427.72	537.3	24
Adam18	TESAFATK	2/y6	427.72	624.34	24
Adam18	TESAFATK	2/y7	427.72	753.38	24
Adam18	YIGAASPGEIC[PPa]SK	2/y7	683.84	804.39	35
Adam18	YIGAASPGEIC[PPa]SK	2/y8	683.84	891.42	35
Adam18	YIGAASPGEIC[PPa]SK	2/y9	683.84	962.46	35
Adam21	ALPSLIDLSQTGSTQYLSSPEVVIPLK	3/b8	952.86	823.49	51.643
Adam21	ALPSLIDLSQTGSTQYLSSPEVVIPLK	3/y8	952.86	894.57	51.643
Adam21	ALPSLIDLSQTGSTQYLSSPEVVIPLK	3/y9	952.86	981.6	52
Adam21	DGTTC[PPa]GVGK	2/y5	454.71	534.27	25
Adam21	DGTTC[PPa]GVGK	2/y6	454.71	635.32	25
Adam21	DGTTC[PPa]GVGK	2/y7	454.71	736.37	25
Adam21	FGHC[PPa]GTDGTVFLK	2/y9	726.85	937.5	37
Adam21	FGHC[PPa]GTDGTVFLK	3/y4	484.9	506.33	28
Adam21	FGHC[PPa]GTDGTVFLK	3/y6	484.9	664.4	28
Adam21	FGHC[PPa]GTDGTVFLK	3/y7	484.9	779.43	28.245
Adam21	GYGGSIDSGPTSQK	2/y7	677.32	704.36	35
Adam21	GYGGSIDSGPTSQK	2/y8	677.32	819.38	35
Adam21	GYGGSIDSGPTSQK	2/y9	677.32	932.47	35
Adam21	GYGGSIDSGPTSQKR	2/y7	755.37	773.43	38
Adam21	GYGGSIDSGPTSQKR	2/y8	755.37	860.46	38
Adam21	GYGGSIDSGPTSQKR	2/y9	755.37	975.49	38
Adam21	HDEESC[PPa]SC[PPa]GK	2/y6	618.73	726.29	32
Adam21	HDEESC[PPa]SC[PPa]GK	2/y7	618.73	855.33	32
Adam21	HDEESC[PPa]SC[PPa]GK	2/y8	618.73	984.38	32
Adam21	HSSTFEHLVYTLNNNK	3/b6	635.31	689.29	36
Adam21	HSSTFEHLVYTLNNNK	3/y7	635.31	866.44	36
Adam21	HSSTFEHLVYTLNNNK	3/y8	635.31	965.51	36
Adam21	KC[PPa]VSLSVLSNAC[PPa]LPETC[PPa]NR	3/b7	750.71	788.43	42
Adam21	KC[PPa]VSLSVLSNAC[PPa]LPETC[PPa]NR	3/y6	750.71	790.35	42
Adam21	KC[PPa]VSLSVLSNAC[PPa]LPETC[PPa]NR	3/y7	750.71	903.44	42
Adam21	LLYQPFGVEEAKK	3/y11(2)	507.95	648.34	29
Adam21	LLYQPFGVEEAKK	3/y5	507.95	604.33	29
Adam21	LLYQPFGVEEAKK	3/y7	507.95	760.42	29
Adam21	LLYQPFGVEEAKK	3/y9(2)	507.95	502.97	29.397
Adam21	NSEWLSYSLVFGGR	2/b7	807.9	880.38	41
Adam21	NSEWLSYSLVFGGR	2/y7	807.9	735.41	40.548
Adam21	NSEWLSYSLVFGGR	2/y8	807.9	898.48	41
Adam21	NSEWLSYSLVFGGR	2/y9	807.9	985.51	41
Adam21	RLLYQPFGVEEAKK	3/b5	559.98	674.4	32
Adam21	RLLYQPFGVEEAKK	3/y7	559.98	760.42	32
Adam21	RLLYQPFGVEEAKK	3/y8	559.98	907.49	32
Adam21	VTLLLLWLK	2/y5	549.87	672.44	29
Adam21	VTLLLLWLK	2/y6	549.87	785.53	29
Adam21	VTLLLLWLK	2/y7	549.87	898.61	29
Lepr	AEITVNTGLLK	2/y7	579.84	744.46	31
Lepr	AEITVNTGLLK	2/y8	579.84	845.51	31
Lepr	AEITVNTGLLK	2/y9	579.84	958.59	31
Lepr	FNSSGIYVPELSK	2/b8	720.87	868.42	37
Lepr	FNSSGIYVPELSK	2/y5	720.87	573.32	36.718
Lepr	FNSSGIYVPELSK	2/y7	720.87	835.46	37
Lepr	FNSSGIYVPELSK	2/y8	720.87	948.54	37
Lepr	FYIHDNFIPIEK	3/b11(2)	512.6	695.35	30
Lepr	FYIHDNFIPIEK	3/b6	512.6	790.35	30
Lepr	FYIHDNFIPIEK	3/b7	512.6	937.42	30
Lepr	FYIHDNFIPIEK	3/y4	512.6	486.29	29.63
Lepr	GC[PPa]EC[PPa]HVPVPR	2/b5	619.79	672.22	32
Lepr	GC[PPa]EC[PPa]HVPVPR	2/b6	619.79	771.29	32
Lepr	GC[PPa]EC[PPa]HVPVPR	2/y6	619.79	704.42	32
Lepr	IPEIQYSIVSDR	2/b7	710.38	831.42	36
Lepr	IPEIQYSIVSDR	2/y7	710.38	839.43	36
Lepr	IPEIQYSIVSDR	2/y8	710.38	967.48	36
Lepr	KLFWDDVPNPK	2/b7	679.86	904.46	35
Lepr	KLFWDDVPNPK	2/y7	679.86	784.38	35
Lepr	KLFWDDVPNPK	2/y8	679.86	970.46	35
Lepr	LFC[PPa]GPPNTTDDSFLSPAGAPNNASALK	3/y10	926.11	942.5	50
Lepr	LFC[PPa]GPPNTTDDSFLSPAGAPNNASALK	3/y12(2)	926.11	555.96	50.306
Lepr	LFC[PPa]GPPNTTDDSFLSPAGAPNNASALK	3/y8	926.11	814.44	50.306
Lepr	LFWDDVPNPK	2/y6	615.81	669.36	32
Lepr	LFWDDVPNPK	2/y7	615.81	784.38	32
Lepr	LFWDDVPNPK	2/y8	615.81	970.46	32
Lepr	NC[PPa]SWAQGLNFQK	2/b6	733.85	761.3	37
Lepr	NC[PPa]SWAQGLNFQK	2/y6	733.85	706.39	37.289
Lepr	NC[PPa]SWAQGLNFQK	2/y7	733.85	834.45	37
Lepr	NC[PPa]SWAQGLNFQK	2/y8	733.85	905.48	37
Lepr	NDSLC[PPa]SVR	2/y4	482.73	535.27	26
Lepr	NDSLC[PPa]SVR	2/y5	482.73	648.35	26
Lepr	NDSLC[PPa]SVR	2/y6	482.73	735.38	26
Lepr	NENQIISSK	2/y5	516.77	547.34	28
Lepr	NENQIISSK	2/y6	516.77	675.4	28
Lepr	NENQIISSK	2/y7	516.77	789.45	28
Lepr	NLAEKIPEIQYSIVSDR	3/b8	659.02	895.49	37
Lepr	NLAEKIPEIQYSIVSDR	3/y6	659.02	676.36	37
Lepr	NLAEKIPEIQYSIVSDR	3/y7	659.02	839.43	37
Lepr	SLYC[PPa]PDSPSIHPTSEPK	3/y13(2)	643.64	696.34	36
Lepr	SLYC[PPa]PDSPSIHPTSEPK	3/y6	643.64	658.34	36
Lepr	SLYC[PPa]PDSPSIHPTSEPK	3/y7	643.64	795.4	36
Lepr	TAHNGTWSEDVGNR	3/y5	515.23	560.28	30
Lepr	TAHNGTWSEDVGNR	3/y6	515.23	689.32	30
Lepr	TAHNGTWSEDVGNR	3/y7	515.23	776.35	30
Lepr	THEVFDAK	2/b6	473.73	729.32	26
Lepr	THEVFDAK	2/y5	473.73	579.31	26
Lepr	THEVFDAK	2/y6	473.73	708.36	26
Lepr	VHLLYDLPEVIDDSPLPPLK	3/b7	758.42	854.48	42
Lepr	VHLLYDLPEVIDDSPLPPLK	3/y8	758.42	866.5	42
Lepr	VHLLYDLPEVIDDSPLPPLK	3/y9	758.42	981.53	42
Lepr	VTFSNLK	2/y4	404.73	461.27	23
Lepr	VTFSNLK	2/y5	404.73	608.34	23
Lepr	VTFSNLK	2/y6	404.73	709.39	23
Lepr	YLENSTIVR	2/y5	547.8	575.35	29
Lepr	YLENSTIVR	2/y6	547.8	689.39	29
Lepr	YLENSTIVR	2/y7	547.8	818.44	29
Msr1	ADLIDTGR	2/y4	430.73	448.22	24
Msr1	ADLIDTGR	2/y5	430.73	561.3	24
Msr1	ADLIDTGR	2/y6	430.73	674.38	24
Msr1	DWEHSQTLK	2/b7	572.28	884.35	30
Msr1	DWEHSQTLK	2/y6	572.28	713.39	30
Msr1	DWEHSQTLK	2/y7	572.28	842.44	30
Msr1	EDADC[PPa]SSESVK	2/y6	620.75	636.32	32
Msr1	EDADC[PPa]SSESVK	2/y7	620.75	810.37	32
Msr1	EDADC[PPa]SSESVK	2/y9	620.75	996.43	32
Msr1	EEQAHVEQEVK	2/y6	663.32	731.39	34
Msr1	EEQAHVEQEVK	2/y7	663.32	868.45	34
Msr1	EEQAHVEQEVK	2/y8	663.32	939.49	34
Msr1	GDRGQIGFPGGR	3/b4	406.21	386.21	24.311
Msr1	GDRGQIGFPGGR	3/b7	406.21	684.34	24
Msr1	GDRGQIGFPGGR	3/y5	406.21	533.28	24
Msr1	GDRGQIGFPGGR	3/y6	406.21	590.3	24
Msr1	GIPGVKGDR	2/y5	449.76	574.33	25
Msr1	GIPGVKGDR	2/y6	449.76	631.35	25
Msr1	GIPGVKGDR	2/y7	449.76	728.4	25
Msr1	GIPGVKGDR	2/y7(2)	449.76	364.82	24.789
Msr1	GLTGQTGPPGAPGIR	2/y8	689.88	764.44	35
Msr1	GLTGQTGPPGAPGIR	2/y9	689.88	821.46	35
Msr1	GLTGQTGPPGAPGIR	3/y7	460.25	667.39	27
Msr1	GNPGAPGKPGR	2/y6	504.27	611.36	27
Msr1	GNPGAPGKPGR	2/y8	504.27	739.42	27
Msr1	GNPGAPGKPGR	2/y9	504.27	836.47	27
Msr1	GNPGAPGKPGR	2/y9(2)	504.27	418.86	27.188
Msr1	GQIGFPGGR	2/y5	444.74	533.28	25
Msr1	GQIGFPGGR	2/y6	444.74	590.3	25
Msr1	GQIGFPGGR	2/y7	444.74	703.39	25
Msr1	IQSISNSK	2/y5	438.74	548.3	24
Msr1	IQSISNSK	2/y6	438.74	635.34	24
Msr1	IQSISNSK	2/y7	438.74	763.39	24
Msr1	IQSISNSKADLIDTGR	3/y12(2)	573.31	638.83	33
Msr1	IQSISNSKADLIDTGR	3/y14(2)	573.31	738.89	33
Msr1	IQSISNSKADLIDTGR	3/y8	573.31	860.45	33
Msr1	LKDWEHSQTLK	3/y10(2)	462.25	636.32	27
Msr1	LKDWEHSQTLK	3/y5	462.25	576.34	27
Msr1	LKDWEHSQTLK	3/y8(2)	462.25	514.76	27
Msr1	NC[PPa]LVC[PPa]SR	2/y3	468.72	436.2	25.624
Msr1	NC[PPa]LVC[PPa]SR	2/y4	468.72	535.27	26
Msr1	NC[PPa]LVC[PPa]SR	2/y5	468.72	648.35	26
Msr1	NC[PPa]LVC[PPa]SR	2/y6	468.72	822.4	26
Msr1	NGPSVQEK	2/y4	429.72	503.28	24
Msr1	NGPSVQEK	2/y5	429.72	590.31	24
Msr1	NGPSVQEK	2/y6	429.72	687.37	24
Msr1	NITFIQGPPGPQGEK	2/y10	791.91	994.5	40
Msr1	NITFIQGPPGPQGEK	2/y8	791.91	809.42	40
Msr1	NITFIQGPPGPQGEK	2/y9	791.91	866.44	40
Msr1	NITFIQGPPGPQGEKGDR	3/b14(2)	637.66	718.86	36
Msr1	NITFIQGPPGPQGEKGDR	3/f843	637.66	842.73	35.883
Msr1	NITFIQGPPGPQGEKGDR	3/y12(2)	637.66	598.06	35.883
Msr1	NITFIQGPPGPQGEKGDR	3/y13(2)	637.66	661.83	36
Msr1	NITFIQGPPGPQGEKGDR	3/y15(2)	637.66	791.9	36
Msr1	VLNNITNDLR	2/y5	586.33	618.32	31
Msr1	VLNNITNDLR	2/y6	586.33	731.4	31
Msr1	VLNNITNDLR	2/y8	586.33	959.49	31
Msr1	VSAEVQSVK	2/y6	473.76	689.38	26
Msr1	VSAEVQSVK	2/y7	473.76	760.42	26
Msr1	VSAEVQSVK	2/y8	473.76	847.45	26
Msr1	VSAEVQSVKEEQAHVEQEVK	4/b16(2)	564.04	875.93	31
Msr1	VSAEVQSVKEEQAHVEQEVK	4/y12(2)	564.04	727.37	31
Msr1	VSAEVQSVKEEQAHVEQEVK	4/y15(2)	564.04	884.45	31
Acvr1b	HDAVTDTIDIAPNQR	3/b9	555.94	968.43	32
Acvr1b	HDAVTDTIDIAPNQR	3/y5	555.94	585.31	32
Acvr1b	HDAVTDTIDIAPNQR	3/y7	555.94	813.42	32
Acvr1b	HENILGFIAADNK	3/b4	481.25	494.24	28
Acvr1b	HENILGFIAADNK	3/b6	481.25	664.34	28
Acvr1b	HENILGFIAADNK	3/y5	481.25	518.26	28
Acvr1b	TIVLQEIIGK	2/y6	557.35	687.4	30
Acvr1b	TIVLQEIIGK	2/y7	557.35	800.49	30
Acvr1b	TIVLQEIIGK	2/y8	557.35	899.56	30
Acvr2a	AQLLNEYVAVK	2/y6	624.35	708.39	32
Acvr2a	AQLLNEYVAVK	2/y7	624.35	822.44	32
Acvr2a	AQLLNEYVAVK	2/y8	624.35	935.52	32
Acvr2a	DGHKPAISHR	2/b9	559.3	943.47	30
Acvr2a	DGHKPAISHR	2/y6	559.3	680.38	30
Acvr2a	DGHKPAISHR	2/y7	559.3	808.48	30
Acvr2a	GLAYLHEDIPGLK	3/y11(2)	475.93	628.34	28
Acvr2a	GLAYLHEDIPGLK	3/y7	475.93	771.42	28
Acvr2a	GLAYLHEDIPGLK	3/y8	475.93	908.48	28
Acvr2a	GSLSDFLK	2/y4	433.73	522.29	24
Acvr2a	GSLSDFLK	2/y5	433.73	609.32	24
Acvr2a	GSLSDFLK	2/y6	433.73	722.41	24
Acvr2a	HENILQFIGAEK	3/b4	466.92	494.24	27
Acvr2a	HENILQFIGAEK	3/y6	466.92	664.37	27
Acvr2a	HENILQFIGAEK	3/y7	466.92	792.43	27
Acvr2a	LSAGC[PPa]VGER	2/y6	481.74	691.32	26
Acvr2a	LSAGC[PPa]VGER	2/y7	481.74	762.36	26
Acvr2a	LSAGC[PPa]VGER	2/y8	481.74	849.39	26
Acvr2a	SAGDTHGQVGTR	2/y6	593.28	617.34	31
Acvr2a	SAGDTHGQVGTR	2/y7	593.28	754.4	31
Acvr2a	SAGDTHGQVGTR	2/y8	593.28	855.44	31
Acvr2a	TNQTGVEPC[PPa]YGDK	2/y6	741.83	753.32	38
Acvr2a	TNQTGVEPC[PPa]YGDK	2/y7	741.83	882.37	38
Acvr2a	TNQTGVEPC[PPa]YGDK	2/y8	741.83	981.43	38
Acvrl1	DEQSWFR	2/y3	484.22	508.27	26
Acvrl1	DEQSWFR	2/y4	484.22	595.3	26
Acvrl1	DEQSWFR	2/y5	484.22	723.36	26
Acvrl1	DLHSDLGESSLILK	3/b5	509.61	568.24	29
Acvrl1	DLHSDLGESSLILK	3/b7	509.61	738.34	29
Acvrl1	DLHSDLGESSLILK	3/y6	509.61	660.43	29
Acvrl1	EC[PPa]WYPNPSAR	2/b4	647.29	653.24	33
Acvrl1	EC[PPa]WYPNPSAR	2/y7	647.29	804.4	33
Acvrl1	EC[PPa]WYPNPSAR	2/y8	647.29	990.48	33
Acvrl1	EQGRHPQVYR	3/b5	423.89	608.29	25
Acvrl1	EQGRHPQVYR	3/y3	423.89	437.25	25
Acvrl1	EQGRHPQVYR	3/y8(2)	423.89	506.78	25
Acvrl1	ETEIYNTVLLR	2/y6	675.87	715.45	35
Acvrl1	ETEIYNTVLLR	2/y7	675.87	878.51	35
Acvrl1	ETEIYNTVLLR	2/y8	675.87	991.59	35
Acvrl1	GDLAKPSK	2/y4	408.23	459.29	23
Acvrl1	GDLAKPSK	2/y5	408.23	530.33	23
Acvrl1	GDLAKPSK	2/y6	408.23	643.41	23
Acvrl1	GRYGEVWR	2/b5	511.76	563.26	28
Acvrl1	GRYGEVWR	2/b6	511.76	662.33	28
Acvrl1	GRYGEVWR	2/y6	511.76	809.39	28
Acvrl1	HPQVYR	2/y3	400.21	437.25	23
Acvrl1	HPQVYR	2/y4	400.21	565.31	23
Acvrl1	HPQVYR	2/y5	400.21	662.36	23
Acvrl1	LSHNPEKPK	2/b7	525.29	806.42	28
Acvrl1	LSHNPEKPK	2/y5	525.29	598.36	28
Acvrl1	LSHNPEKPK	2/y6	525.29	712.4	28
Acvrl1	LVNC[PPa]TC[PPa]ESPHC[PPa]K	3/y10(2)	516.23	667.77	30
Acvrl1	LVNC[PPa]TC[PPa]ESPHC[PPa]K	3/y4	516.23	555.27	30
Acvrl1	LVNC[PPa]TC[PPa]ESPHC[PPa]K	3/y7	516.23	945.39	30
Acvrl1	QTLEPQLALR	2/b6	584.84	697.35	31
Acvrl1	QTLEPQLALR	2/y7	584.84	826.48	31
Acvrl1	QTLEPQLALR	2/y8	584.84	939.56	31
Acvrl1	TDC[PPa]FESYK	2/y5	532.22	673.32	28
Acvrl1	TDC[PPa]FESYK	2/y6	532.22	847.37	28
Acvrl1	TDC[PPa]FESYK	2/y7	532.22	962.39	28
Acvrl1	VVC[PPa]VDQQTPTIPNR	3/y5	547.62	600.35	31
Acvrl1	VVC[PPa]VDQQTPTIPNR	3/y6	547.62	697.4	31
Acvrl1	VVC[PPa]VDQQTPTIPNR	3/y7	547.62	798.45	31
Acvrl1	YGEVWR	2/y3	405.2	460.27	23
Acvrl1	YGEVWR	2/y4	405.2	589.31	23
Acvrl1	YGEVWR	2/y5	405.2	646.33	23
Bmpr1a	C[PPa]ATLDTR	2/b6	425.71	676.3	24
Bmpr1a	C[PPa]ATLDTR	2/y4	425.71	504.28	24
Bmpr1a	C[PPa]ATLDTR	2/y5	425.71	605.33	24
Bmpr1a	DLEQDEAFIPVGESLK	2/b8	895.45	948.39	44
Bmpr1a	DLEQDEAFIPVGESLK	2/y8	895.45	842.5	44.4
Bmpr1a	DLEQDEAFIPVGESLK	2/y9	895.45	989.57	44
Bmpr1a	DLEQDEAFIPVGESLK	3/y5	597.3	533.29	33.865
Bmpr1a	DLEQDEAFIPVGESLK	3/y7	597.3	729.41	34
Bmpr1a	DLIDQSQSSGSGSGLPLLVQR	3/y4	719.71	515.33	39.985
Bmpr1a	DLIDQSQSSGSGSGLPLLVQR	3/y6	719.71	725.47	40
Bmpr1a	DLIDQSQSSGSGSGLPLLVQR	3/y8	719.71	895.57	40
Bmpr1a	DLIDQSQSSGSGSGLPLLVQR	3/y9	719.71	982.6	40
Bmpr1a	EVVC[PPa]VKR	2/b6	452.26	729.4	25
Bmpr1a	EVVC[PPa]VKR	2/y4	452.26	576.33	25
Bmpr1a	EVVC[PPa]VKR	2/y5	452.26	675.4	25
Bmpr1a	FNSDTNEVDIPLNTR	2/y6	867.92	713.43	43.188
Bmpr1a	FNSDTNEVDIPLNTR	2/y8	867.92	927.53	43
Bmpr1a	FNSDTNEVDIPLNTR	3/y5	578.95	600.35	33
Bmpr1a	FNSDTNEVDIPLNTR	3/y7	578.95	828.46	33
Bmpr1a	KNGSC[PPa]C[PPa]IADLGLAVK	3/b6	545.28	735.29	31
Bmpr1a	KNGSC[PPa]C[PPa]IADLGLAVK	3/y7	545.28	715.43	31
Bmpr1a	KNGSC[PPa]C[PPa]IADLGLAVK	3/y8	545.28	786.47	31
Bmpr1a	KPENGVTLAPEDTLPFLK	3/b7	657.03	726.38	37
Bmpr1a	KPENGVTLAPEDTLPFLK	3/b8	657.03	839.46	37
Bmpr1a	KPENGVTLAPEDTLPFLK	3/b9	657.03	910.5	37
Bmpr1a	LRPIVSNR	2/b6	477.8	666.43	26
Bmpr1a	LRPIVSNR	2/b7	477.8	780.47	26
Bmpr1a	LRPIVSNR	2/y6	477.8	685.4	26
Bmpr1a	NGSC[PPa]C[PPa]IADLGLAVK	2/b8	753.38	906.34	38
Bmpr1a	NGSC[PPa]C[PPa]IADLGLAVK	2/y11(2)	753.38	624.51	38.149
Bmpr1a	NGSC[PPa]C[PPa]IADLGLAVK	2/y7	753.38	715.43	38.149
Bmpr1b	LRPSFPNR	2/y6	493.78	717.37	27
Bmpr1b	NGTC[PPa]C[PPa]IADLGLAVK	2/y8	760.38	786.47	38
Bmpr1b	NGTC[PPa]C[PPa]IADLGLAVK	2/y9	760.38	899.56	38
Bmpr1b	NGTC[PPa]C[PPa]IADLGLAVK	3/y6	507.26	600.41	29
Bmpr1b	SIEC[PPa]C[PPa]TER	2/y4	541.73	579.26	29
Bmpr1b	SIEC[PPa]C[PPa]TER	2/y5	541.73	753.3	29
Bmpr1b	SIEC[PPa]C[PPa]TER	2/y6	541.73	882.34	29
Bmpr1b	SKNILVK	2/b5	401.26	556.35	23
Bmpr1b	SKNILVK	2/b6	401.26	655.41	23
Bmpr1b	SKNILVK	2/y5	401.26	586.39	23
Bmpr1b	VFFTTEEASWFR	2/b7	760.36	854.39	38
Bmpr1b	VFFTTEEASWFR	2/y5	760.36	666.34	38.456
Bmpr1b	VFFTTEEASWFR	2/y6	760.36	795.38	38
Bmpr1b	VFFTTEEASWFR	2/y7	760.36	924.42	38
Bmpr1b	WSSDEC[PPa]LR	2/y5	533.73	706.32	28
Bmpr1b	WSSDEC[PPa]LR	2/y6	533.73	793.35	28
Bmpr1b	WSSDEC[PPa]LR	2/y7	533.73	880.38	28
Bmpr1b	YSIGLEQDETYIPPGESLR	3/b8	723.02	906.42	40
Bmpr1b	YSIGLEQDETYIPPGESLR	3/y6	723.02	658.35	40.151
Bmpr1b	YSIGLEQDETYIPPGESLR	3/y7	723.02	755.4	40
Bmpr1b	YSIGLEQDETYIPPGESLR	3/y8	723.02	868.49	40
Epha1	C[PPa]PQHSIAESEGSTIC[PPa]TC[PPa]EN[Dea]GHYR	4/b7	684.79	808.38	37
Epha1	C[PPa]PQHSIAESEGSTIC[PPa]TC[PPa]EN[Dea]GHYR	4/b8	684.79	937.42	37
Epha1	C[PPa]PQHSIAESEGSTIC[PPa]TC[PPa]EN[Dea]GHYR	4/y13(2)	684.79	792.33	37
Epha1	GIAQDGGPC[PPa]QPC[PPa]GK	2/b10	736.83	998.44	37
Epha1	GIAQDGGPC[PPa]QPC[PPa]GK	2/y4	736.83	475.23	37.421
Epha1	GIAQDGGPC[PPa]QPC[PPa]GK	2/y7	736.83	874.39	37
Epha1	GIAQDGGPC[PPa]QPC[PPa]GK	2/y9	736.83	988.43	37
Epha1	ILC[PPa]SIQGFKD	2/y6	597.81	707.37	31
Epha1	ILC[PPa]SIQGFKD	2/y7	597.81	794.4	31
Epha1	ILC[PPa]SIQGFKD	2/y8	597.81	968.45	31
Epha1	LLDDFDGTYETQGGK	2/b8	829.88	877.39	42
Epha1	LLDDFDGTYETQGGK	2/y7	829.88	782.37	41.515
Epha1	LLDDFDGTYETQGGK	2/y8	829.88	883.42	42
Epha1	LLDDFDGTYETQGGK	2/y9	829.88	940.44	42
Epha1	LPSLSGSDGIPYR	2/b10	681.36	927.48	35
Epha1	LPSLSGSDGIPYR	2/y8	681.36	864.42	35
Epha1	LPSLSGSDGIPYR	2/y9	681.36	951.45	35
Epha1	LQPDTTYIVR	2/y6	603.33	752.43	32
Epha1	LQPDTTYIVR	2/y7	603.33	867.46	32
Epha1	LQPDTTYIVR	2/y8	603.33	964.51	32
Epha1	SIEDGYR	2/b4	420.2	445.19	23
Epha1	SIEDGYR	2/y3	420.2	395.2	23.489
Epha1	SIEDGYR	2/y4	420.2	510.23	23
Epha1	SIEDGYR	2/y5	420.2	639.27	23
Epha1	SVSEWLESIR	2/y5	603.31	617.36	32
Epha1	SVSEWLESIR	2/y6	603.31	803.44	32
Epha1	SVSEWLESIR	2/y7	603.31	932.48	32
Epha1	TIANFDPR	2/y4	467.24	534.27	26
Epha1	TIANFDPR	2/y5	467.24	648.31	26
Epha1	TIANFDPR	2/y6	467.24	719.35	26
Epha1	TLTPLGPGPFSPDHEFR	3/y11(2)	623.32	643.3	35
Epha1	TLTPLGPGPFSPDHEFR	3/y14(2)	623.32	776.88	35
Epha1	VSDFGLTR	2/y5	447.74	593.34	25
Epha1	VSDFGLTR	2/y6	447.74	708.37	25
Epha1	VSDFGLTR	2/y7	447.74	795.4	25
Epha1	VTTVAADQSFTIR	2/y6	704.88	751.41	36
Epha1	VTTVAADQSFTIR	2/y7	704.88	866.44	36
Epha1	VTTVAADQSFTIR	2/y8	704.88	937.47	36
Epha1	YILHFR	2/y3	424.74	459.25	24
Epha1	YILHFR	2/y4	424.74	572.33	24
Epha1	YILHFR	2/y5	424.74	685.41	24
Epha1	YSVEC[PPa]LQC[PPa]R	2/y5	621.78	764.35	32
Epha1	YSVEC[PPa]LQC[PPa]R	2/y6	621.78	893.4	32
Epha1	YSVEC[PPa]LQC[PPa]R	2/y7	621.78	992.47	32
Epha2	AC[PPa]SPGFFK	2/y5	464.22	595.32	25
Epha2	AC[PPa]SPGFFK	2/y6	464.22	682.36	25
Epha2	AC[PPa]SPGFFK	2/y7	464.22	856.4	25
Epha2	AC[PPa]SPGFFK	2/y7(2)	464.22	428.94	25.426
Epha2	FADIVSILDK	2/y5	560.82	575.34	30
Epha2	FADIVSILDK	2/y6	560.82	674.41	30
Epha2	FADIVSILDK	2/y8	560.82	902.52	30
Epha2	KKGDANSYNVR	2/y6	626.33	752.37	33
Epha2	KKGDANSYNVR	2/y7	626.33	823.41	33
Epha2	KKGDANSYNVR	2/y9	626.33	995.45	33
Epha2	LPSTSGSEGVPFR	2/b10	667.34	915.44	34
Epha2	LPSTSGSEGVPFR	2/y6	667.34	704.37	34.363
Epha2	LPSTSGSEGVPFR	2/y7	667.34	791.4	34.363
Epha2	LPSTSGSEGVPFR	2/y8	667.34	848.43	34
Epha2	LPSTSGSEGVPFR	2/y9	667.34	935.46	34
Epha2	NGVSGLVTSR	2/y6	495.27	632.37	27
Epha2	NGVSGLVTSR	2/y7	495.27	719.4	27
Epha2	NGVSGLVTSR	2/y8	495.27	818.47	27
Epha2	NGVSGLVTSR	2/y9	495.27	875.49	26.792
Epha2	NILVNSNLVC[PPa]K	2/y6	644.36	734.39	33
Epha2	NILVNSNLVC[PPa]K	2/y7	644.36	848.43	33
Epha2	NILVNSNLVC[PPa]K	2/y8	644.36	947.5	33
Epha2	SEQLKPLK	2/y4	471.78	485.34	26
Epha2	SEQLKPLK	2/y5	471.78	598.43	26
Epha2	SEQLKPLK	2/y6	471.78	726.49	26
Epha2	TASVSINQTEPPK	2/y6	686.36	699.37	35
Epha2	TASVSINQTEPPK	2/y7	686.36	813.41	35
Epha2	TASVSINQTEPPK	2/y8	686.36	926.49	35
Epha2	TLADFDPR	2/y4	467.73	534.27	26
Epha2	TLADFDPR	2/y5	467.73	649.29	26
Epha2	TLADFDPR	2/y6	467.73	720.33	26
Epha2	VIGAGEFGEVYK	2/y11(2)	634.83	585.59	32.933
Epha2	VIGAGEFGEVYK	2/y6	634.83	742.38	33
Epha2	VIGAGEFGEVYK	2/y7	634.83	871.42	33
Epha2	VIGAGEFGEVYK	2/y8	634.83	928.44	33
Epha2	VLEDDPEATYTTSGGK	2/y9	841.89	885.43	42
Epha2	VLEDDPEATYTTSGGK	3/y6	561.6	550.28	32.08
Epha2	VLEDDPEATYTTSGGK	3/y7	561.6	713.35	32
Epha2	VLEDDPEATYTTSGGK	3/y8	561.6	814.39	32
Epha2	VLEDDPEATYTTSGGKIPIR	3/y16(2)	721.37	853.44	40
Epha2	VLEDDPEATYTTSGGKIPIR	3/y7	721.37	740.48	40
Epha2	VLEDDPEATYTTSGGKIPIR	3/y8	721.37	827.51	40.069
Epha2	VLEDDPEATYTTSGGKIPIR	3/y9	721.37	928.56	40
Epha2	VSDFGLSR	2/y5	440.73	579.32	24
Epha2	VSDFGLSR	2/y6	440.73	694.35	24
Epha2	VSDFGLSR	2/y7	440.73	781.38	24
Epha2	WTAPEAISYR	2/y5	597.3	609.34	31
Epha2	WTAPEAISYR	2/y7	597.3	835.43	31
Epha2	WTAPEAISYR	2/y8	597.3	906.47	31
Epha3	C[PPa]TC[PPa]NAGYEER	2/y5	644.26	653.29	33
Epha3	C[PPa]TC[PPa]NAGYEER	2/y6	644.26	724.33	33
Epha3	C[PPa]TC[PPa]NAGYEER	2/y7	644.26	838.37	33
Epha3	DITFNIIC[PPa]K	2/y5	569.3	661.37	30
Epha3	DITFNIIC[PPa]K	2/y6	569.3	808.44	30
Epha3	DITFNIIC[PPa]K	2/y7	569.3	909.49	30
Epha3	ELDATNISIDK	2/y6	609.81	689.38	32
Epha3	ELDATNISIDK	2/y7	609.81	790.43	32
Epha3	ELDATNISIDK	2/y9	609.81	976.49	32
Epha3	EVGPVNKK	2/b7	435.76	724.4	24
Epha3	EVGPVNKK	2/y5	435.76	585.37	24
Epha3	EVGPVNKK	2/y6	435.76	642.39	24
Epha3	FEQIVSILDK	2/y6	596.33	674.41	31
Epha3	FEQIVSILDK	2/y7	596.33	787.49	31
Epha3	FEQIVSILDK	2/y8	596.33	915.55	31
Epha3	FREHQFTK	2/b4	546.78	570.28	29
Epha3	FREHQFTK	2/b5	546.78	698.34	29
Epha3	FREHQFTK	2/b6	546.78	845.41	29
Epha3	GTNVTISSLKPDTTYVFQIR	3/y14(2)	747.4	827.94	41
Epha3	GTNVTISSLKPDTTYVFQIR	3/y16(2)	747.4	935.01	41
Epha3	GTNVTISSLKPDTTYVFQIR	3/y7	747.4	926.51	41
Epha3	NILINSNLVC[PPa]K	2/y6	651.37	734.39	34
Epha3	NILINSNLVC[PPa]K	2/y7	651.37	848.43	34
Epha3	NILINSNLVC[PPa]K	2/y8	651.37	961.51	34
Epha3	[PGQ]-QEQETSYTILR	2/y6	675.83	752.43	35
Epha3	[PGQ]-QEQETSYTILR	2/y7	675.83	853.48	35
Epha3	[PGQ]-QEQETSYTILR	2/y8	675.83	982.52	35
Epha3	TAAGYGTNSR	2/y5	499.24	534.26	27
Epha3	TAAGYGTNSR	2/y7	499.24	754.35	27
Epha3	TAAGYGTNSR	2/y8	499.24	825.38	27
Epha3	TYVDPHTYEDPTQAVHEFAK	3/b7	783.37	814.37	43
Epha3	TYVDPHTYEDPTQAVHEFAK	3/y7	783.37	801.43	43
Epha3	TYVDPHTYEDPTQAVHEFAK	3/y8	783.37	929.48	43
Epha3	VGVTVVGPQK	2/y5	492.3	528.31	27
Epha3	VGVTVVGPQK	2/y7	492.3	728.43	27
Epha3	VGVTVVGPQK	2/y9	492.3	884.52	27
Epha3	VGVTVVGPQKK	2/y6	556.35	656.41	29
Epha3	VGVTVVGPQKK	2/y7	556.35	755.48	29
Epha3	VGVTVVGPQKK	2/y8	556.35	856.53	29
Epha3	VLEDDPEAAYTTR	2/y8	740.35	908.45	38
Epha3	VLEDDPEAAYTTR	3/y4	493.9	540.28	29
Epha3	VLEDDPEAAYTTR	3/y5	493.9	611.31	29
Epha3	VLEDDPEAAYTTR	3/y6	493.9	682.35	28.695
Epha3	VSDFGLSR	2/y5	440.73	579.32	24
Epha3	VSDFGLSR	2/y6	440.73	694.35	24
Epha3	VSDFGLSR	2/y7	440.73	781.38	24
Epha3	VVGAGEFGEVC[PPa]SGR	2/b10	719.34	945.47	37
Epha3	VVGAGEFGEVC[PPa]SGR	2/y7	719.34	778.35	37
Epha3	VVGAGEFGEVC[PPa]SGR	2/y8	719.34	925.42	37
Epha3	YYEKQEQETSYTILR	3/y5	650.99	665.4	37
Epha3	YYEKQEQETSYTILR	3/y6	650.99	752.43	37
Epha3	YYEKQEQETSYTILR	3/y7	650.99	853.48	37
Epha4	AIEEGYR	2/y4	419.21	524.25	23
Epha4	AIEEGYR	2/y5	419.21	653.29	23
Epha4	AIEEGYR	2/y6	419.21	766.37	23
Epha4	ALSTDASC[PPa]AK	2/y6	519.25	665.29	28
Epha4	ALSTDASC[PPa]AK	2/y7	519.25	766.34	28
Epha4	ALSTDASC[PPa]AK	2/y8	519.25	853.37	28
Epha4	HLNQGVR	2/b6	412.23	649.34	23
Epha4	HLNQGVR	2/y5	412.23	573.31	23
Epha4	HLNQGVR	2/y6	412.23	686.39	23
Epha4	IGITAITHQNK	2/y5	598.34	627.32	31
Epha4	IGITAITHQNK	2/y6	598.34	740.4	31
Epha4	IGITAITHQNK	2/y8	598.34	912.49	31
Epha4	NILVNSNLVC[PPa]K	2/y6	644.36	734.39	33
Epha4	NILVNSNLVC[PPa]K	2/y7	644.36	848.43	33
Epha4	NILVNSNLVC[PPa]K	2/y8	644.36	947.5	33
Epha4	TAAGYGDFSEPLEVTTNTVPSR	3/b10	771.37	999.41	43
Epha4	TAAGYGDFSEPLEVTTNTVPSR	3/y7	771.37	774.41	42.569
Epha4	TAAGYGDFSEPLEVTTNTVPSR	3/y8	771.37	875.46	43
Epha4	TAAGYGDFSEPLEVTTNTVPSR	3/y9	771.37	974.53	43
Epha4	TYVDPFTYEDPNQAVR	2/b7	957.95	824.38	47.15
Epha4	TYVDPFTYEDPNQAVR	2/b8	957.95	987.45	47
Epha4	TYVDPFTYEDPNQAVR	2/y6	957.95	684.38	47.15
Epha4	TYVDPFTYEDPNQAVR	2/y7	957.95	799.41	47.15
Epha4	TYVDPFTYEDPNQAVR	2/y8	957.95	928.45	47.15
Epha4	VIGVGEFGEVC[PPa]SGR	2/b10	740.37	987.51	38
Epha4	VIGVGEFGEVC[PPa]SGR	2/y7	740.37	778.35	38
Epha4	VIGVGEFGEVC[PPa]SGR	2/y8	740.37	925.42	38
Epha4	VLEDDPEAAYTTR	2/b8	740.35	869.39	38
Epha4	VLEDDPEAAYTTR	2/y5	740.35	611.31	37.575
Epha4	VLEDDPEAAYTTR	2/y7	740.35	811.39	38
Epha4	VLEDDPEAAYTTR	2/y8	740.35	908.45	38
Epha4	WTAPEAIAYR	2/y7	589.3	819.44	31
Epha4	WTAPEAIAYR	2/y8	589.3	890.47	31
Epha4	WTAPEAIAYR	2/y9	589.3	991.52	31
Epha7	AIEEGYR	2/b4	419.21	443.21	23
Epha7	AIEEGYR	2/y3	419.21	395.2	23.445
Epha7	AIEEGYR	2/y4	419.21	524.25	23
Epha7	AIEEGYR	2/y5	419.21	653.29	23
Epha7	AVHQFAK	2/b6	400.72	654.34	23
Epha7	AVHQFAK	2/y4	400.72	493.28	23
Epha7	AVHQFAK	2/y5	400.72	630.34	23
Epha7	AVTAAGYGNYSPR	2/y6	663.83	693.33	34
Epha7	AVTAAGYGNYSPR	2/y8	663.83	913.42	34
Epha7	AVTAAGYGNYSPR	2/y9	663.83	984.45	34
Epha7	EVLLLDSK	2/y4	458.77	462.26	25.186
Epha7	EVLLLDSK	2/y5	458.77	575.34	25
Epha7	EVLLLDSK	2/y6	458.77	688.42	25
Epha7	EVLLLDSK	2/y7	458.77	787.49	25
Epha7	FEQIVGILDK	2/y6	581.33	644.4	31
Epha7	FEQIVGILDK	2/y7	581.33	757.48	31
Epha7	FEQIVGILDK	2/y8	581.33	885.54	31
Epha7	IDTIAADESFTQGDLGER	2/y6	969.46	646.32	47.656
Epha7	IDTIAADESFTQGDLGER	2/y7	969.46	774.37	47.656
Epha7	IDTIAADESFTQGDLGER	2/y8	969.46	875.42	47.656
Epha7	LDVATLEEASGK	2/y7	616.82	733.37	32
Epha7	LDVATLEEASGK	2/y8	616.82	834.42	32
Epha7	LDVATLEEASGK	2/y9	616.82	905.46	32
Epha7	TYIDPETYEDPNR	2/b4	806.86	493.23	40.502
Epha7	TYIDPETYEDPNR	2/b7	806.86	820.37	41
Epha7	TYIDPETYEDPNR	2/b8	806.86	983.44	41
Epha7	TYIDPETYEDPNR	2/y5	806.86	630.28	40.502
Epha7	TYIDPETYEDPNR	2/y7	806.86	894.4	41
Epha7	VIEDDPEAVYTTTGGK	2/y9	847.91	897.47	42
Epha7	VIEDDPEAVYTTTGGK	3/b8	565.61	869.39	32
Epha7	VIEDDPEAVYTTTGGK	3/y6	565.61	564.3	32.28
Epha7	VIEDDPEAVYTTTGGK	3/y7	565.61	727.36	32
Epha7	VSDFGLSR	2/y5	440.73	579.32	24
Epha7	VSDFGLSR	2/y6	440.73	694.35	24
Epha7	VSDFGLSR	2/y7	440.73	781.38	24
Epha7	YKDNFTAAGYNSLESVAR	3/y5	669.33	561.3	37.466
Epha7	YKDNFTAAGYNSLESVAR	3/y6	669.33	674.38	37
Epha7	YKDNFTAAGYNSLESVAR	3/y7	669.33	761.42	37
Epha7	YKDNFTAAGYNSLESVAR	3/y8	669.33	875.46	37
Ephb4	APSGAVLDYEVK	2/y6	624.83	766.4	32
Ephb4	APSGAVLDYEVK	2/y7	624.83	865.47	32
Ephb4	APSGAVLDYEVK	2/y9	624.83	993.53	32
Ephb4	DLVEPWVAIR	2/y6	599.33	741.44	31
Ephb4	DLVEPWVAIR	2/y7	599.33	870.48	31
Ephb4	DLVEPWVAIR	2/y8	599.33	969.55	31
Ephb4	EDLTYAVR	2/y4	483.75	508.29	26
Ephb4	EDLTYAVR	2/y5	483.75	609.34	26
Ephb4	EDLTYAVR	2/y6	483.75	722.42	26
Ephb4	FLEENSSDPTYTSSLGGK	3/b8	644.63	922.38	36
Ephb4	FLEENSSDPTYTSSLGGK	3/y7	644.63	649.35	36.232
Ephb4	FLEENSSDPTYTSSLGGK	3/y8	644.63	812.41	36
Ephb4	FLEENSSDPTYTSSLGGK	3/y9	644.63	913.46	36
Ephb4	FPQVVSALDK	2/y6	552.31	632.36	29
Ephb4	FPQVVSALDK	2/y7	552.31	731.43	29
Ephb4	FPQVVSALDK	2/y8	552.31	859.49	29
Ephb4	IGFLSPAVPPAVSDIR	2/b8	819.96	785.46	41.078
Ephb4	IGFLSPAVPPAVSDIR	2/y8	819.96	854.47	41
Ephb4	IGFLSPAVPPAVSDIR	2/y9	819.96	953.54	41
Ephb4	VSDFGLSR	2/y5	440.73	579.32	24
Ephb4	VSDFGLSR	2/y6	440.73	694.35	24
Ephb4	VSDFGLSR	2/y7	440.73	781.38	24
Ephb4	VYIDPFTYEDPNEAVR	3/y12(2)	643.31	719.34	36
Ephb4	VYIDPFTYEDPNEAVR	3/y6	643.31	685.36	36
Ephb4	VYIDPFTYEDPNEAVR	3/y7	643.31	800.39	36
Ephb4	WTAPEAIAFR	2/y7	581.31	803.44	31
Ephb4	WTAPEAIAFR	2/y8	581.31	874.48	31
Ephb4	WTAPEAIAFR	2/y9	581.31	975.53	31
Ephb6	ASSDPPEAPC[PPa]TGPPSAPR	3/b8	603.28	755.32	34
Ephb6	ASSDPPEAPC[PPa]TGPPSAPR	3/y6	603.28	624.35	34
Ephb6	ASSDPPEAPC[PPa]TGPPSAPR	3/y7	603.28	681.37	34
Ephb6	C[PPa]QPGHQPAR	2/b6	532.76	722.3	28
Ephb6	C[PPa]QPGHQPAR	2/y6	532.76	665.35	28
Ephb6	C[PPa]QPGHQPAR	2/y7	532.76	762.4	28
Ephb6	C[PPa]RDEVHFDPR	3/b4	448.88	575.22	26
Ephb6	C[PPa]RDEVHFDPR	3/b5	448.88	674.29	26
Ephb6	C[PPa]RDEVHFDPR	3/b8(2)	448.88	537.23	26
Ephb6	ETFTLYYR	2/y4	546.77	614.33	29
Ephb6	ETFTLYYR	2/y5	546.77	715.38	29
Ephb6	ETFTLYYR	2/y6	546.77	862.45	29
Ephb6	EVDPTYIK	2/y4	482.75	524.31	26
Ephb6	EVDPTYIK	2/y5	482.75	621.36	26
Ephb6	EVDPTYIK	2/y6	482.75	736.39	26
Ephb6	GDLLFNVVC[PPa]K	2/y5	589.82	633.34	31
Ephb6	GDLLFNVVC[PPa]K	2/y6	589.82	780.41	31
Ephb6	GDLLFNVVC[PPa]K	2/y7	589.82	893.49	31
Ephb6	GTGYTEQLQQYSSPGLGVK	3/b7	671.67	737.31	38
Ephb6	GTGYTEQLQQYSSPGLGVK	3/y8	671.67	744.43	38
Ephb6	GTGYTEQLQQYSSPGLGVK	3/y9	671.67	907.49	38
Ephb6	IEEVIGAGSFGEVR	2/y10	731.88	992.52	37
Ephb6	IEEVIGAGSFGEVR	2/y7	731.88	751.37	37
Ephb6	IEEVIGAGSFGEVR	2/y9	731.88	879.43	37
Ephb6	LC[PPa]QAC[PPa]PEGSYK	2/y6	670.8	680.32	35
Ephb6	LC[PPa]QAC[PPa]PEGSYK	2/y7	670.8	854.37	35
Ephb6	LC[PPa]QAC[PPa]PEGSYK	2/y8	670.8	925.41	35
Ephb6	LFSYTC[PPa]PSVLR	2/b6	678.85	786.35	35
Ephb6	LFSYTC[PPa]PSVLR	2/y6	678.85	745.4	35
Ephb6	LFSYTC[PPa]PSVLR	2/y7	678.85	846.45	35
Ephb6	LGHSPQGSSSLLR	3/y4	446.91	488.32	26
Ephb6	LGHSPQGSSSLLR	3/y5	446.91	575.35	26
Ephb6	LGHSPQGSSSLLR	3/y7	446.91	719.4	26
Ephb6	LPQELGGR	2/y5	435.25	531.29	24
Ephb6	LPQELGGR	2/y6	435.25	659.35	24
Ephb6	LPQELGGR	2/y7	435.25	756.4	24
Ephb6	LSPGHIYGFQVR	3/y10(2)	458.58	587.31	27
Ephb6	LSPGHIYGFQVR	3/y5	458.58	606.34	27
Ephb6	LSPGHIYGFQVR	3/y6	458.58	769.4	27
Ephb6	RGTGYTEQLQQYSSPGLGVK	3/b8	723.7	893.41	40
Ephb6	RGTGYTEQLQQYSSPGLGVK	3/y8	723.7	744.43	40
Ephb6	RGTGYTEQLQQYSSPGLGVK	3/y9	723.7	907.49	40
Ephb6	SFGPLTQR	2/y4	453.25	517.31	25
Ephb6	SFGPLTQR	2/y5	453.25	614.36	25
Ephb6	SFGPLTQR	2/y6	453.25	671.38	25
Ephb6	SVLVNSHLVC[PPa]K	2/b9	635.35	949.55	33
Ephb6	SVLVNSHLVC[PPa]K	2/y7	635.35	871.45	33
Ephb6	SVLVNSHLVC[PPa]K	2/y8	635.35	970.51	33
Ephb6	VDTIAADESFPASSSSSSWAVGPHR	3/y16(2)	854.4	830.51	46.72
Ephb6	VDTIAADESFPASSSSSSWAVGPHR	3/y8	854.4	909.47	47
Ephb6	VDTIAADESFPASSSSSSWAVGPHR	3/y9	854.4	996.5	47
Ephb6	VGLQLNVK	2/y4	435.77	473.31	24
Ephb6	VGLQLNVK	2/y5	435.77	601.37	24
Ephb6	VGLQLNVK	2/y7	435.77	771.47	24
Ephb6	YYIDPSTYDDPC[PPa]QAIR	3/y6	664.3	758.4	37
Ephb6	YYIDPSTYDDPC[PPa]QAIR	3/y7	664.3	873.42	37
Ephb6	YYIDPSTYDDPC[PPa]QAIR	3/y8	664.3	988.45	37
Erbb2	AC[PPa]PPC[PPa]APTC[PPa]K	2/y6	602.27	764.34	31
Erbb2	AC[PPa]PPC[PPa]APTC[PPa]K	2/y7	602.27	861.4	31
Erbb2	AC[PPa]PPC[PPa]APTC[PPa]K	2/y8	602.27	958.45	31
Erbb2	AC[PPa]PPC[PPa]APTC[PPa]K	2/y8(2)	602.27	479.89	31.5
Erbb2	DPLDNVTTAAPGR	2/y7	663.84	673.36	34
Erbb2	DPLDNVTTAAPGR	2/y8	663.84	772.43	34
Erbb2	DPLDNVTTAAPGR	2/y9	663.84	886.47	34
Erbb2	GRLPTDC[PPa]C[PPa]HEQC[PPa]AAGC[PPa]TGPK	4/b11(2)	583.51	691.8	32
Erbb2	GRLPTDC[PPa]C[PPa]HEQC[PPa]AAGC[PPa]TGPK	4/y6	583.51	633.3	32
Erbb2	GRLPTDC[PPa]C[PPa]HEQC[PPa]AAGC[PPa]TGPK	4/y7	583.51	704.34	32
Erbb2	LPTDC[PPa]C[PPa]HEQC[PPa]AAGC[PPa]TGPK	3/b6	706.63	775.31	39
Erbb2	LPTDC[PPa]C[PPa]HEQC[PPa]AAGC[PPa]TGPK	3/y16(2)	706.63	954.38	39
Erbb2	LPTDC[PPa]C[PPa]HEQC[PPa]AAGC[PPa]TGPK	3/y7	706.63	704.34	39.332
Erbb2	LPTDC[PPa]C[PPa]HEQC[PPa]AAGC[PPa]TGPK	3/y9	706.63	949.42	39
Erbb2	SLTEILK	2/y4	402.25	502.32	23
Erbb2	SLTEILK	2/y5	402.25	603.37	23
Erbb2	SLTEILK	2/y6	402.25	716.46	23
Erbb2	VKHVPLQR	2/y4	488.81	513.31	27
Erbb2	VKHVPLQR	2/y5	488.81	612.38	27
Erbb2	VKHVPLQR	2/y6	488.81	749.44	27
Erbb2	YALAVLDNR	2/y5	517.79	616.34	28
Erbb2	YALAVLDNR	2/y6	517.79	687.38	28
Erbb2	YALAVLDNR	2/y7	517.79	800.46	28
Erbb2	YALAVLDNRDPLDNVTTAAPGR	3/y16(2)	781.41	856.42	43
Erbb2	YALAVLDNRDPLDNVTTAAPGR	3/y17(2)	781.41	912.96	43
Erbb2	YALAVLDNRDPLDNVTTAAPGR	3/y6	781.41	572.32	43.07
Erbb2	YALAVLDNRDPLDNVTTAAPGR	3/y7	781.41	673.36	43.07
Erbb2	YALAVLDNRDPLDNVTTAAPGR	3/y9	781.41	886.47	43
Fgfr1	DGVQLVESNR	2/y5	558.79	604.3	30
Fgfr1	DGVQLVESNR	2/y6	558.79	717.39	30
Fgfr1	DGVQLVESNR	2/y7	558.79	845.45	30
Fgfr1	IADFGLAR	2/y5	431.74	563.33	24
Fgfr1	IADFGLAR	2/y6	431.74	678.36	24
Fgfr1	IADFGLAR	2/y7	431.74	749.39	24
Fgfr1	IGPDNLPYVQILK	3/y5	490.62	600.41	29
Fgfr1	IGPDNLPYVQILK	3/y6	490.62	763.47	29
Fgfr1	IGPDNLPYVQILK	3/y7	490.62	860.52	29
Fgfr1	ITGEEVEVR	2/y5	516.27	631.34	28
Fgfr1	ITGEEVEVR	2/y7	516.27	817.41	28
Fgfr1	ITGEEVEVR	2/y8	516.27	918.45	28
Fgfr1	LRDDVQSINWLR	3/b5	505.61	599.31	29
Fgfr1	LRDDVQSINWLR	3/y4	505.61	588.33	29
Fgfr1	LRDDVQSINWLR	3/y6	505.61	788.44	29
Fgfr1	SPHRPILQAGLPANK	3/y13(2)	533.64	707.92	31
Fgfr1	SPHRPILQAGLPANK	3/y6	533.64	599.35	31
Fgfr4	DGQAFHGENR	2/y5	565.75	612.28	30
Fgfr4	DGQAFHGENR	2/y6	565.75	759.35	30
Fgfr4	DGQAFHGENR	2/y7	565.75	830.39	30
Fgfr4	EC[PPa]WHAAPSQRPTFK	3/y11(2)	576.95	620.33	33
Fgfr4	EC[PPa]WHAAPSQRPTFK	3/y12(2)	576.95	713.37	33
Fgfr4	EC[PPa]WHAAPSQRPTFK	3/y8	576.95	960.53	33
Fgfr4	GRLEIASFLPEDAGR	3/b8	544.29	874.48	31
Fgfr4	GRLEIASFLPEDAGR	3/b9	544.29	987.56	31
Fgfr4	GRLEIASFLPEDAGR	3/y6	544.29	644.3	31
Fgfr4	GTYTC[PPa]LVENSLGSIR	2/b8	842.42	938.43	42
Fgfr4	GTYTC[PPa]LVENSLGSIR	2/y8	842.42	875.46	42
Fgfr4	GTYTC[PPa]LVENSLGSIR	2/y9	842.42	974.53	42
Fgfr4	GVHHIDYYK	2/b6	566.28	659.33	30
Fgfr4	GVHHIDYYK	2/y5	566.28	701.35	30
Fgfr4	GVHHIDYYK	2/y6	566.28	838.41	30
Fgfr4	GVHHIDYYKK	3/b4	420.56	431.21	25
Fgfr4	GVHHIDYYKK	3/y5	420.56	716.36	25
Fgfr4	GVHHIDYYKK	3/y8(2)	420.56	552.29	25
Fgfr4	KLHAVPAGNTVK	3/b4	412.25	450.28	25
Fgfr4	KLHAVPAGNTVK	3/y6	412.25	589.33	25
Fgfr4	KLHAVPAGNTVK	3/y7	412.25	686.38	25
Fgfr4	LEIASFLPEDAGR	2/y7	709.37	757.38	36
Fgfr4	LEIASFLPEDAGR	2/y8	709.37	904.45	36.212
Fgfr4	LEIASFLPEDAGR	2/y9	709.37	991.48	36
Fgfr4	LEIASFLPEDAGR	3/y6	473.25	644.3	28
Fgfr4	LHAVPAGNTVK	2/y7	553.82	686.38	29
Fgfr4	LHAVPAGNTVK	2/y8	553.82	785.45	29
Fgfr4	LHAVPAGNTVK	2/y9	553.82	856.49	29
Fgfr4	LVLGKPLGEGC[PPa]FGQVVR	3/y6	615.01	705.4	35
Fgfr4	LVLGKPLGEGC[PPa]FGQVVR	3/y7	615.01	879.45	35
Fgfr4	LVLGKPLGEGC[PPa]FGQVVR	3/y8	615.01	936.47	35
Fgfr4	RPPGPDLSPDGPR	3/b6	454.24	620.32	27
Fgfr4	RPPGPDLSPDGPR	3/b7	454.24	733.4	27
Fgfr4	RPPGPDLSPDGPR	3/y5	454.24	541.27	27
Fgfr4	TLSSSSSGHVYPQQAPYWTHPQR	4/y13(2)	654.32	836.4	36
Fgfr4	TLSSSSSGHVYPQQAPYWTHPQR	4/y6	654.32	824.42	36
Fgfr4	TLSSSSSGHVYPQQAPYWTHPQR	4/y7	654.32	987.48	36
Fgfr4	TTDINSSEVEVLYLR	3/y5	580.3	663.42	33
Fgfr4	TTDINSSEVEVLYLR	3/y6	580.3	792.46	33
Fgfr4	TTDINSSEVEVLYLR	3/y7	580.3	891.53	33
Fgfr4	VLLAVSEEYLDLR	2/b8	760.42	841.47	38
Fgfr4	VLLAVSEEYLDLR	2/y6	760.42	808.42	38
Fgfr4	VLLAVSEEYLDLR	2/y7	760.42	937.46	38
Fgfr4	YSYLLDVLER	2/b6	635.84	755.36	33
Fgfr4	YSYLLDVLER	2/y5	635.84	631.34	32.977
Fgfr4	YSYLLDVLER	2/y6	635.84	744.43	33
Fgfr4	YSYLLDVLER	2/y7	635.84	857.51	33
Flt3	DILSDSSYVVR	2/y6	627.32	710.38	33
Flt3	DILSDSSYVVR	2/y7	627.32	825.41	33
Flt3	DILSDSSYVVR	2/y8	627.32	912.44	33
Flt3	DTQLYVLR	2/y4	504.28	550.33	27
Flt3	DTQLYVLR	2/y5	504.28	663.42	27
Flt3	DTQLYVLR	2/y6	504.28	791.48	27
Flt3	DYEYDLK	2/b2	473.21	279.1	25.821
Flt3	DYEYDLK	2/b4	473.21	571.2	26
Flt3	DYEYDLK	2/y4	473.21	538.29	26
Igf1r	AENGPGPGVLVLR	2/y10	639.86	964.59	33
Igf1r	AENGPGPGVLVLR	2/y7	639.86	753.5	33
Igf1r	AENGPGPGVLVLR	2/y9	639.86	907.57	33
Igf1r	ALPLPQSSTC[PPa]	2/b6	544.28	620.38	29
Igf1r	ALPLPQSSTC[PPa]	2/y6	544.28	693.29	29
Igf1r	ALPLPQSSTC[PPa]	2/y8	544.28	903.42	29
Igf1r	ASC[PPa]ESDVLR	2/y5	525.75	589.33	28
Igf1r	ASC[PPa]ESDVLR	2/y6	525.75	718.37	28
Igf1r	ASC[PPa]ESDVLR	2/y7	525.75	892.42	28
Igf1r	DIYETDYYR	2/y4	619.27	616.27	32.248
Igf1r	DIYETDYYR	2/y5	619.27	717.32	32
Igf1r	DIYETDYYR	2/y6	619.27	846.36	32
Igf1r	GNLLINIR	2/y4	456.78	515.33	25
Igf1r	GNLLINIR	2/y5	456.78	628.41	25
Igf1r	GNLLINIR	2/y6	456.78	741.5	25
Igf1r	GVVKDEPETR	2/b8	565.3	854.43	30
Igf1r	GVVKDEPETR	2/y6	565.3	746.33	30
Igf1r	GVVKDEPETR	2/y7	565.3	874.43	30
Igf1r	LC[PPa]VSEIYR	2/y5	527.27	667.34	28
Igf1r	LC[PPa]VSEIYR	2/y6	527.27	766.41	28
Igf1r	LC[PPa]VSEIYR	2/y7	527.27	940.46	28
Igf1r	LGC[PPa]SASNFVFAR	2/y7	671.83	840.44	35
Igf1r	LGC[PPa]SASNFVFAR	2/y8	671.83	911.47	35
Igf1r	LGC[PPa]SASNFVFAR	2/y9	671.83	998.51	35
Igf1r	SEILYIR	2/b5	447.26	606.31	25
Igf1r	SEILYIR	2/y3	447.26	451.27	24.679
Igf1r	SEILYIR	2/y4	447.26	564.35	25
Igf1r	SEILYIR	2/y5	447.26	677.43	25
Igf1r	TVNEAASMR	2/y5	489.74	535.27	27
Igf1r	TVNEAASMR	2/y6	489.74	664.31	27
Igf1r	TVNEAASMR	2/y7	489.74	778.35	27
Igf1r	YADGTIDVEEVTENPK	2/b9	890.42	964.43	44
Igf1r	YADGTIDVEEVTENPK	2/y7	890.42	816.41	44.178
Igf1r	YADGTIDVEEVTENPK	2/y8	890.42	945.45	44
Igf1r	YGSQVEDQREC[PPa]VSR	3/y10(2)	576.27	646.31	33
Igf1r	YGSQVEDQREC[PPa]VSR	3/y11(2)	576.27	710.34	33
Igf1r	YGSQVEDQREC[PPa]VSR	3/y7(2)	576.27	474.84	32.813
Igf1r	YGSQVEDQREC[PPa]VSR	3/y9(2)	576.27	596.77	33
Insr	DIIKGEAETR	2/y6	566.3	662.31	30
Insr	DIIKGEAETR	2/y7	566.3	790.41	30
Insr	DIIKGEAETR	2/y8	566.3	903.49	30
Insr	DIYETDYYR	2/y5	619.27	717.32	32
Insr	DIYETDYYR	2/y6	619.27	846.36	32
Insr	ESLVISGLR	2/y5	487.29	545.34	26
Insr	ESLVISGLR	2/y6	487.29	644.41	26
Insr	ESLVISGLR	2/y7	487.29	757.49	26
Insr	GLSPGNYSVR	2/y6	525.27	695.35	28
Insr	GLSPGNYSVR	2/y7	525.27	792.4	28
Insr	GLSPGNYSVR	2/y8	525.27	879.43	28
Insr	TIDSVTSAQELR	2/y6	660.34	703.37	34
Insr	TIDSVTSAQELR	2/y7	660.34	804.42	34
Insr	TIDSVTSAQELR	2/y9	660.34	990.52	34
Insr	TVNESASLR	2/y5	488.76	533.3	27
Insr	TVNESASLR	2/y6	488.76	662.35	27
Insr	TVNESASLR	2/y7	488.76	776.39	27
Insr	VC[PPa]QILEGEK	2/y6	545.28	688.39	29
Insr	VC[PPa]QILEGEK	2/y7	545.28	816.45	29
Insr	VC[PPa]QILEGEK	2/y8	545.28	990.49	29
Mst1r	C[PPa]FLHELEPR	3/y4	405.54	514.3	24
Mst1r	C[PPa]FLHELEPR	3/y5	405.54	643.34	24
Mst1r	C[PPa]FLHELEPR	3/y6	405.54	780.4	24
Mst1r	ELVLDC[PPa]HFAPK	2/y6	671.84	773.38	35
Mst1r	ELVLDC[PPa]HFAPK	2/y7	671.84	888.4	35
Mst1r	ELVLDC[PPa]HFAPK	2/y9(2)	671.84	551	34.561
Mst1r	GAPEGTQPYPVLQAAHSAPVDAK	3/b18(2)	768.73	888.44	42
Mst1r	GAPEGTQPYPVLQAAHSAPVDAK	3/y14(2)	768.73	702.58	42.436
Mst1r	GAPEGTQPYPVLQAAHSAPVDAK	3/y16(2)	768.73	832.44	42
Mst1r	GAPEGTQPYPVLQAAHSAPVDAK	3/y8	768.73	824.43	42
Mst1r	LNAVEPEIGDYR	2/b5	688.35	527.28	35.287
Mst1r	LNAVEPEIGDYR	2/b8	688.35	866.46	35
Mst1r	LNAVEPEIGDYR	2/y7	688.35	849.41	35
Mst1r	LNAVEPEIGDYR	2/y8	688.35	978.45	35
Mst1r	LSAASTNLNWQC[PPa]PR	2/b9	816.4	872.45	41
Mst1r	LSAASTNLNWQC[PPa]PR	2/y5	816.4	760.36	40.922
Mst1r	LSAASTNLNWQC[PPa]PR	2/y6	816.4	874.4	41
Mst1r	LSAASTNLNWQC[PPa]PR	2/y7	816.4	987.48	41
Mst1r	RGAPEGTQPYPVLQAAHSAPVDAK	3/b8	820.76	797.39	45.038
Mst1r	RGAPEGTQPYPVLQAAHSAPVDAK	3/y10	820.76	966.5	45
Mst1r	RGAPEGTQPYPVLQAAHSAPVDAK	3/y16(2)	820.76	832.44	45
Mst1r	RGAPEGTQPYPVLQAAHSAPVDAK	3/y9	820.76	895.46	45
Mst1r	SDTSGFQPGFPSLSVLPK	2/b6	932.48	595.24	46.029
Mst1r	SDTSGFQPGFPSLSVLPK	2/b7	932.48	723.29	46.029
Mst1r	SDTSGFQPGFPSLSVLPK	2/y9	932.48	987.59	46
Mst1r	SDTSGFQPGFPSLSVLPK	3/y7	621.99	743.47	35
Mst1r	SDTSGFQPGFPSLSVLPK	3/y8	621.99	840.52	35
Mst1r	VQATAAYEDSTNSAVFVATR	3/y16(2)	701.01	851.41	39
Mst1r	VQATAAYEDSTNSAVFVATR	3/y5	701.01	593.34	39.051
Mst1r	VQATAAYEDSTNSAVFVATR	3/y7	701.01	763.45	39
Mst1r	VQATAAYEDSTNSAVFVATR	3/y9	701.01	964.52	39
Mst1r	YLASYLIK	2/y5	485.78	623.38	26
Mst1r	YLASYLIK	2/y6	485.78	694.41	26
Mst1r	YLASYLIK	2/y7	485.78	807.5	26
Mst1r	YVVPSFSAGGR	2/y7	570.3	681.33	30
Mst1r	YVVPSFSAGGR	2/y8	570.3	778.38	30
Mst1r	YVVPSFSAGGR	2/y9	570.3	877.45	30
Ntrk2	ASLAC[PPa]PTSC[PPa]K	2/y5	561.77	606.29	30
Ntrk2	ASLAC[PPa]PTSC[PPa]K	2/y6	561.77	780.34	30
Ntrk2	ASLAC[PPa]PTSC[PPa]K	2/y7	561.77	851.37	30
Ntrk2	GFVLFHK	2/y3	424.24	431.24	24
Ntrk2	GFVLFHK	2/y4	424.24	544.32	24
Ntrk2	GFVLFHK	2/y5	424.24	643.39	24
Ntrk2	GFVLFHKIPLDG	2/b8	671.88	942.56	35
Ntrk2	GFVLFHKIPLDG	2/y7	671.88	779.44	35
Ntrk2	GFVLFHKIPLDG	2/y8	671.88	926.51	35
Ntrk2	ITNISSDDSGK	2/y7	568.78	695.28	30
Ntrk2	ITNISSDDSGK	2/y8	568.78	808.37	30
Ntrk2	ITNISSDDSGK	2/y9	568.78	922.41	30
Ntrk2	IWC[PPa]TEPSPGIVAFPR	3/y5	581.97	589.35	33
Ntrk2	IWC[PPa]TEPSPGIVAFPR	3/y7	581.97	759.45	33
Ntrk2	IWC[PPa]TEPSPGIVAFPR	3/y8	581.97	856.5	33
Ntrk2	LAAPNLTVEEGK	2/y6	621.34	662.34	32
Ntrk2	LAAPNLTVEEGK	2/y8	621.34	889.46	32
Ntrk2	LAAPNLTVEEGK	2/y9	621.34	986.52	32
Ntrk2	LEPNSVDPENITEILIANQK	3/b7	746.39	755.36	41
Ntrk2	LEPNSVDPENITEILIANQK	3/y7	746.39	799.5	41
Ntrk2	LEPNSVDPENITEILIANQK	3/y8	746.39	928.55	41
Ntrk2	NEYGKDER	2/b6	505.73	707.3	27
Ntrk2	NEYGKDER	2/y5	505.73	604.3	27
Ntrk2	NEYGKDER	2/y6	505.73	767.37	27
Ntrk2	NKLTSLSR	2/b5	459.77	544.31	25
Ntrk2	NKLTSLSR	2/y5	459.77	563.31	25
Ntrk2	NKLTSLSR	2/y6	459.77	676.4	25
Ntrk2	NLTIVDSGLK	2/y6	530.31	618.35	28
Ntrk2	NLTIVDSGLK	2/y7	530.31	731.43	28
Ntrk2	NLTIVDSGLK	2/y8	530.31	832.48	28
Ntrk2	RLEIINEDDVEAYVGLR	3/b6	668.68	739.45	37
Ntrk2	RLEIINEDDVEAYVGLR	3/y6	668.68	678.39	37
Ntrk2	RLEIINEDDVEAYVGLR	3/y7	668.68	807.44	37
Ntrk2	SNEIPSTDVADQSNR	3/y11(2)	544.92	595.28	31
Ntrk2	SNEIPSTDVADQSNR	3/y5	544.92	619.28	31
Ntrk2	SNEIPSTDVADQSNR	3/y6	544.92	690.32	31
Ntrk2	SSPDTQDLYC[PPa]LNESSK	3/b7	619.94	731.28	35
Ntrk2	SSPDTQDLYC[PPa]LNESSK	3/y6	619.94	677.35	35
Ntrk2	SSPDTQDLYC[PPa]LNESSK	3/y7	619.94	851.39	35
Pdgfrb	AFHEDDEVQLSFK	3/b7	522.25	844.31	30
Pdgfrb	AFHEDDEVQLSFK	3/y10(2)	522.25	605.29	30
Pdgfrb	AFHEDDEVQLSFK	3/y5	522.25	622.36	30
Pdgfrb	DSNYISK	2/y4	413.7	510.29	23
Pdgfrb	DSNYISK	2/y5	413.7	624.34	23
Pdgfrb	DSNYISK	2/y6	413.7	711.37	23
Pdgfrb	GGPIYIITEYC[PPa]R	2/y5	728.37	742.32	37
Pdgfrb	GGPIYIITEYC[PPa]R	2/y6	728.37	855.4	37
Pdgfrb	GGPIYIITEYC[PPa]R	2/y7	728.37	968.49	37
Pdgfrb	HTFLQR	2/y3	401.22	416.26	23
Pdgfrb	HTFLQR	2/y4	401.22	563.33	23
Pdgfrb	HTFLQR	2/y5	401.22	664.38	23
Pdgfrb	HVDQPLSVR	2/y6	525.79	699.41	28
Pdgfrb	HVDQPLSVR	2/y7	525.79	814.44	28
Pdgfrb	HVDQPLSVR	2/y8	525.79	913.51	28
Pdgfrb	IC[PPa]DFGLAR	2/y5	483.25	563.33	26
Pdgfrb	IC[PPa]DFGLAR	2/y6	483.25	678.36	26
Pdgfrb	IC[PPa]DFGLAR	2/y7	483.25	852.4	26
Pdgfrb	KLSPTPLGNSSK	2/y10	614.85	987.51	32
Pdgfrb	KLSPTPLGNSSK	2/y7	614.85	702.38	32
Pdgfrb	KLSPTPLGNSSK	2/y9	614.85	900.48	32
Pdgfrb	KVDIPLHVPYDHQR	3/b6	572.98	666.42	33
Pdgfrb	KVDIPLHVPYDHQR	3/y6	572.98	815.38	33
Pdgfrb	KVDIPLHVPYDHQR	3/y7	572.98	914.45	33
Pdgfrb	KYQQVDEEFLR	2/b6	727.87	762.38	37
Pdgfrb	KYQQVDEEFLR	2/y6	727.87	808.38	37
Pdgfrb	KYQQVDEEFLR	2/y7	727.87	907.45	37
Pdgfrb	LLETLGDVEIAELHR	2/y7	854.47	867.47	43
Pdgfrb	LLETLGDVEIAELHR	2/y8	854.47	966.54	42.597
Pdgfrb	LLETLGDVEIAELHR	3/y5	569.98	625.34	32
Pdgfrb	LLETLGDVEIAELHR	3/y6	569.98	738.43	32
Pdgfrb	LVEPVTDYLFGVPSR	2/y8	846.45	938.51	42
Pdgfrb	LVEPVTDYLFGVPSR	3/b7	564.64	754.4	32.232
Pdgfrb	LVEPVTDYLFGVPSR	3/b8	564.64	917.46	32
Pdgfrb	LVEPVTDYLFGVPSR	3/y5	564.64	515.29	32.232
Pdgfrb	LVEPVTDYLFGVPSR	3/y6	564.64	662.36	32
Pdgfrb	SDHPAILR	2/y4	454.75	472.32	25
Pdgfrb	SDHPAILR	2/y5	454.75	569.38	25
Pdgfrb	SDHPAILR	2/y6	454.75	706.44	25
Pdgfrb	VLELSESHPANGEQTIR	2/b8	940.48	895.45	46.381
Pdgfrb	VLELSESHPANGEQTIR	2/y14(2)	940.48	769.91	46.381
Tgfbr1	DITPLKK	2/b5	407.76	540.3	23
Tgfbr1	DITPLKK	2/y4	407.76	485.34	23
Tgfbr1	DITPLKK	2/y5	407.76	586.39	23
Tgfbr1	DITPLKK	2/y6(2)	407.76	350.11	22.941
Tgfbr1	EC[PPa]WYANGAAR	2/b4	606.27	653.24	32
Tgfbr1	EC[PPa]WYANGAAR	2/y6	606.27	559.29	31.676
Tgfbr1	EC[PPa]WYANGAAR	2/y7	606.27	722.36	32
Tgfbr1	EC[PPa]WYANGAAR	2/y8	606.27	908.44	32
Tgfbr1	GKWRGEEVAVK	3/b10(2)	420.23	556.8	25
Tgfbr1	GKWRGEEVAVK	3/y5	420.23	545.33	25
Tgfbr1	GKWRGEEVAVK	3/y9(2)	420.23	537.29	25
Tgfbr1	HDSATDTIDIAPN[Dea]HR	3/b7	555.26	728.28	32
Tgfbr1	HDSATDTIDIAPN[Dea]HR	3/b9	555.26	956.4	32
Tgfbr1	HDSATDTIDIAPN[Dea]HR	3/y5	555.26	595.29	32
Tgfbr1	HDSATDTIDIAPNHR	3/b7	554.93	728.28	32
Tgfbr1	HDSATDTIDIAPNHR	3/y4	554.93	523.27	31.747
Tgfbr1	HDSATDTIDIAPNHR	3/y5	554.93	594.31	32
Tgfbr1	HDSATDTIDIAPNHR	3/y7	554.93	822.42	32
Tgfbr1	HENILGFIAADNK	3/b4	481.25	494.24	28
Tgfbr1	HENILGFIAADNK	3/b6	481.25	664.34	28
Tgfbr1	HENILGFIAADNK	3/b7	481.25	811.41	28.063
Tgfbr1	HENILGFIAADNK	3/y5	481.25	518.26	28
Tgfbr1	KLQENKGPFSEK	3/y11(2)	468.92	638.83	27
Tgfbr1	KLQENKGPFSEK	3/y5	468.92	607.31	27
Tgfbr1	KLQENKGPFSEK	3/y6	468.92	664.33	27
Tgfbr1	KTLSQLSQQEGIK	2/b7	730.41	758.44	37
Tgfbr1	KTLSQLSQQEGIK	2/y7	730.41	789.41	37
Tgfbr1	KTLSQLSQQEGIK	2/y8	730.41	902.49	37
Tgfbr1	KVVC[PPa]EQK	2/y4	452.75	578.26	25
Tgfbr1	KVVC[PPa]EQK	2/y5	452.75	677.33	25
Tgfbr1	KVVC[PPa]EQK	2/y6	452.75	776.4	25
Tgfbr1	LQENKGPFSEK	2/y5	638.83	607.31	33.109
Tgfbr1	LQENKGPFSEK	2/y7	638.83	792.43	33.109
Tgfbr1	LQENKGPFSEK	3/y10(2)	426.22	582.29	25
Tgfbr1	LQENKGPFSEK	3/y6	426.22	664.33	25
Tgfbr1	LQENKGPFSEK	3/y9(2)	426.22	518.26	25
Tgfbr1	NGTC[PPa]C[PPa]IADLGLAVR	2/y7	774.39	743.44	39.073
Tgfbr1	NGTC[PPa]C[PPa]IADLGLAVR	2/y8	774.39	814.48	39
Tgfbr1	NGTC[PPa]C[PPa]IADLGLAVR	2/y9	774.39	927.56	39
Tgfbr1	SKNILVK	2/b5	401.26	556.35	23
Tgfbr1	SKNILVK	2/b6	401.26	655.41	23
Tgfbr1	SKNILVK	2/y5	401.26	586.39	23
Tgfbr1	TIVLQESIGK	2/y6	544.32	661.35	29
Tgfbr1	TIVLQESIGK	2/y7	544.32	774.44	29
Tgfbr1	TIVLQESIGK	2/y8	544.32	873.5	29
Tgfbr1	TLSQLSQQEGIK	2/y6	666.36	702.38	34
Tgfbr1	TLSQLSQQEGIK	2/y7	666.36	789.41	34
Tgfbr1	TLSQLSQQEGIK	2/y8	666.36	902.49	34
Tgfbr1	WRGEEVAVK	2/b6	537.29	757.36	29
Tgfbr1	WRGEEVAVK	2/b7	537.29	828.4	29
Tgfbr1	WRGEEVAVK	2/b8	537.29	927.47	29
Tie1	DFAGELEVLC[PPa]K	2/y5	647.82	662.35	34
Tie1	DFAGELEVLC[PPa]K	2/y6	647.82	775.44	34
Tie1	DFAGELEVLC[PPa]K	2/y8	647.82	961.5	34
Tie1	EHGTASTLSSR	2/y6	573.28	650.35	30
Tie1	EHGTASTLSSR	2/y7	573.28	721.38	30
Tie1	EHGTASTLSSR	2/y9	573.28	879.45	30
Tie1	ENISFPQAR	2/y5	531.27	618.34	28
Tie1	ENISFPQAR	2/y6	531.27	705.37	28
Tie1	ENISFPQAR	2/y7	531.27	818.45	28
Tie1	EYASENDHR	2/y5	560.74	670.29	30
Tie1	EYASENDHR	2/y6	560.74	757.32	30
Tie1	EYASENDHR	2/y7	560.74	828.36	30
Tie1	GEEVYVK	2/b5	412.21	578.25	23
Tie1	GEEVYVK	2/y4	412.21	508.31	23
Tie1	GEEVYVK	2/y5	412.21	637.36	23
Tie1	IADFGLSR	2/y5	439.74	579.32	24
Tie1	IADFGLSR	2/y6	439.74	694.35	24
Tie1	IADFGLSR	2/y7	439.74	765.39	24
Tie1	INC[PPa]AAAGNPFPVR	2/y7	700.86	786.43	36
Tie1	INC[PPa]AAAGNPFPVR	2/y8	700.86	857.46	36
Tie1	INC[PPa]AAAGNPFPVR	2/y9	700.86	928.5	36
Tie1	LGHHPNIINLLGAC[PPa]ENR	3/b7	648.01	769.41	36
Tie1	LGHHPNIINLLGAC[PPa]ENR	3/y6	648.01	720.31	36
Tie1	LGHHPNIINLLGAC[PPa]ENR	3/y7	648.01	833.39	36
Tie1	NGSHQVTLR	2/y5	506.27	616.38	27
Tie1	NGSHQVTLR	2/y6	506.27	753.44	27
Tie1	NGSHQVTLR	2/y7	506.27	840.47	27
Tie1	NVLVGENLASK	2/y7	572.32	718.37	30
Tie1	NVLVGENLASK	2/y8	572.32	817.44	30
Tie1	NVLVGENLASK	2/y9	572.32	930.53	30
Tie1	[PGQ]-QLVVSPLVSFSGDGPISSVR	3/y10	676.37	974.49	38
Tie1	[PGQ]-QLVVSPLVSFSGDGPISSVR	3/y7	676.37	715.41	38
Tie1	[PGQ]-QLVVSPLVSFSGDGPISSVR	3/y9	676.37	887.46	38
Tie1	SSDPPLLLEK	2/y6	549.81	712.46	29
Tie1	SSDPPLLLEK	2/y7	549.81	809.51	29
Tie1	SSDPPLLLEK	2/y8	549.81	924.54	29
Tie1	SSDPPLLLEKDDR	2/b8	742.88	823.46	38
Tie1	SSDPPLLLEKDDR	2/y6	742.88	775.39	38
Tie1	SSDPPLLLEKDDR	2/y7	742.88	888.48	38
Tie1	TALLTGLTPGTHYQLDVR	3/y13(2)	652.69	728.88	37
Tie1	TALLTGLTPGTHYQLDVR	3/y14(2)	652.69	779.4	37
Tie1	TALLTGLTPGTHYQLDVR	3/y6	652.69	793.42	37
Tie1	VLETDPAFAR	2/y6	559.8	676.34	30
Tie1	VLETDPAFAR	2/y7	559.8	777.39	30
Tie1	VLETDPAFAR	2/y8	559.8	906.43	30
Tie1	VLYVHNSPGAHLFPDK	3/y12(2)	598.65	660.33	34
Tie1	VLYVHNSPGAHLFPDK	3/y13(2)	598.65	709.86	34
Tie1	VLYVHNSPGAHLFPDK	3/y14(2)	598.65	791.39	34
Tie1	VLYVHNSPGAHLFPDKVTHTVNK	4/b13(2)	644.1	718.38	35
Tie1	VLYVHNSPGAHLFPDKVTHTVNK	4/y16(2)	644.1	880.98	35
Tie1	VLYVHNSPGAHLFPDKVTHTVNK	4/y6	644.1	699.38	35
Tie1	VPPVPLTAPR	2/y6	523.82	654.39	28
Tie1	VPPVPLTAPR	2/y8	523.82	850.51	28
Tie1	VPPVPLTAPR	2/y9	523.82	947.57	28
Tie1	VTHTVNKGDTAVLSAHVHK	3/y16(2)	672.03	838.96	38
Tie1	VTHTVNKGDTAVLSAHVHK	3/y6	672.03	678.37	38
Tie1	VTHTVNKGDTAVLSAHVHK	3/y7	672.03	791.45	38
Tnfrsf10b	C[PPa]NITTNTVC[PPa]R	2/y6	633.8	764.37	33
Tnfrsf10b	C[PPa]NITTNTVC[PPa]R	2/y7	633.8	865.42	33
Tnfrsf10b	C[PPa]NITTNTVC[PPa]R	2/y8	633.8	978.5	33
Tnfrsf10b	DPESANSVHSSLLDR	3/y12(2)	542.93	643.33	31
Tnfrsf10b	DPESANSVHSSLLDR	3/y6	542.93	690.38	31
Tnfrsf10b	DPESANSVHSSLLDR	3/y7	542.93	827.44	31
Tnfrsf10b	GC[PPa]ERDPESANSVHSSLLDR	3/y14(2)	715	756.5	39.75
Tnfrsf10b	GC[PPa]ERDPESANSVHSSLLDR	3/y7	715	827.44	40
Tnfrsf10b	GC[PPa]ERDPESANSVHSSLLDR	3/y8	715	926.51	39.75
Tnfrsf10b	GC[PPa]ERDPESANSVHSSLLDR	4/b5	536.5	632.25	30
Tnfrsf10b	GC[PPa]ERDPESANSVHSSLLDR	4/y6	536.5	690.38	30
Tnfrsf10b	GPC[PPa]LAGQYLSEGNC[PPa]KPC[PPa]R	3/y14(2)	703.66	834.39	39
Tnfrsf10b	GPC[PPa]LAGQYLSEGNC[PPa]KPC[PPa]R	3/y15(2)	703.66	890.93	39
Tnfrsf10b	GPC[PPa]LAGQYLSEGNC[PPa]KPC[PPa]R	3/y7	703.66	919.42	39.183
Tnfrsf10b	GPC[PPa]LAGQYLSEGNC[PPa]KPC[PPa]R	4/y9(2)	528	568.25	29
Tnfrsf10b	LLVPVNGNDSADDLK	2/f673	785.41	672.68	39.558
Tnfrsf10b	LLVPVNGNDSADDLK	2/y8	785.41	877.39	39.558
Tnfrsf10b	LLVPVNGNDSADDLK	2/y9	785.41	934.41	39.558
Tnfrsf10b	LLVPVNGNDSADDLK	3/y5	523.94	561.29	30
Tnfrsf10b	LLVPVNGNDSADDLK	3/y6	523.94	648.32	30
Tnfrsf10b	LLVPVNGNDSADDLK	3/y7	523.94	763.35	30
Tnfrsf12a	AAAGEQAPGTSPC[PPa]SSGSSWSADLDK	3/b11	817.7	941.43	45
Tnfrsf12a	AAAGEQAPGTSPC[PPa]SSGSSWSADLDK	3/y7	817.7	834.4	45
Tnfrsf12a	AAAGEQAPGTSPC[PPa]SSGSSWSADLDK	3/y8	817.7	921.43	45
Tnfrsf13c	EDADSALPR	2/y5	487.23	543.32	26
Tnfrsf13c	EDADSALPR	2/y6	487.23	658.35	26
Tnfrsf13c	EDADSALPR	2/y7	487.23	729.39	26
Tnfrsf13c	HSVPVPATELGSTELVTTK	3/b7	656.02	688.38	36.801
Tnfrsf13c	HSVPVPATELGSTELVTTK	3/b9	656.02	918.47	37
Tnfrsf13c	HSVPVPATELGSTELVTTK	3/y5	656.02	561.36	36.801
Tnfrsf13c	HSVPVPATELGSTELVTTK	3/y9	656.02	935.5	37
Tnfrsf13c	HSVPVPATELGSTELVTTK	4/b5	492.27	520.29	28
Tnfrsf17	ADTELTR	2/y4	403.21	518.29	23
Tnfrsf17	ADTELTR	2/y5	403.21	619.34	23
Tnfrsf17	ADTELTR	2/y6	403.21	734.37	23
Tnfrsf17	C[PPa]SNPPATC[PPa]QPYC[PPa]DPSVTSSVK	3/y12(2)	799.69	677.55	43.984
Tnfrsf17	C[PPa]SNPPATC[PPa]QPYC[PPa]DPSVTSSVK	3/y8	799.69	804.45	43.984
Tnfrsf17	C[PPa]SNPPATC[PPa]QPYC[PPa]DPSVTSSVK	3/y9	799.69	919.47	44
Tnfrsf17	DEPQSPGQLDGSAQLDK	2/b15(2)	892.92	762.5	44.288
Tnfrsf17	DEPQSPGQLDGSAQLDK	2/b5	892.92	557.22	44.288
Tnfrsf17	DEPQSPGQLDGSAQLDK	2/y15(2)	892.92	771.12	44.288
Tnfrsf17	DEPQSPGQLDGSAQLDK	2/y9	892.92	946.48	44
Tnfrsf17	IRAGDDR	2/b5	401.71	513.28	23
Tnfrsf17	IRAGDDR	2/b6	401.71	628.3	23
Tnfrsf17	IRAGDDR	2/y5	401.71	533.23	23
Tnfrsf17	SLEYTVEEC[PPa]TC[PPa]EDC[PPa]VK	3/b7	688.62	822.39	38
Tnfrsf17	SLEYTVEEC[PPa]TC[PPa]EDC[PPa]VK	3/y5	688.62	664.3	38.431
Tnfrsf17	SLEYTVEEC[PPa]TC[PPa]EDC[PPa]VK	3/y6	688.62	838.34	38
Tnfrsf17	SLEYTVEEC[PPa]TC[PPa]EDC[PPa]VK	3/y7	688.62	939.39	38
Tnfrsf1a	DSLC[PPa]PQGK	2/b4	459.72	490.2	25
Tnfrsf1a	DSLC[PPa]PQGK	2/y4	459.72	429.25	25.228
Tnfrsf1a	DSLC[PPa]PQGK	2/y5	459.72	603.29	25
Tnfrsf1a	DSLC[PPa]PQGK	2/y6	459.72	716.38	25
Tnfrsf1a	GTYLVSDC[PPa]PSPGR	2/y7	711.84	802.35	36
Tnfrsf1a	GTYLVSDC[PPa]PSPGR	2/y8	711.84	889.38	36
Tnfrsf1a	GTYLVSDC[PPa]PSPGR	2/y9	711.84	988.45	36
Tnfrsf1a	HEDTLEVVGLVLSK	3/b6	513.62	725.31	30
Tnfrsf1a	HEDTLEVVGLVLSK	3/b7	513.62	824.38	30
Tnfrsf1a	HEDTLEVVGLVLSK	3/y6	513.62	616.4	30
Tnfrsf1a	NNSIC[PPa]C[PPa]TK	2/y4	512.73	596.25	28
Tnfrsf1a	NNSIC[PPa]C[PPa]TK	2/y5	512.73	709.34	28
Tnfrsf1a	NNSIC[PPa]C[PPa]TK	2/y6	512.73	796.37	28
Tnfrsf1a	NPAPSSTTR	2/y5	465.74	551.28	25
Tnfrsf1a	NPAPSSTTR	2/y6	465.74	648.33	25
Tnfrsf1a	NPAPSSTTR	2/y7	465.74	719.37	25
Tnfrsf21	ASSITALASC[PPa]SR	2/y6	619.31	707.35	32
Tnfrsf21	ASSITALASC[PPa]SR	2/y7	619.31	778.39	32
Tnfrsf21	ASSITALASC[PPa]SR	2/y8	619.31	879.44	32
Tnfrsf21	AYAALQHWTIR	3/y4	443.91	575.33	26
Tnfrsf21	AYAALQHWTIR	3/y5	443.91	712.39	26
Tnfrsf21	AYAALQHWTIR	3/y9(2)	443.91	548.31	26
Tnfrsf21	C[PPa]FFVDESEPLLR	2/b7	763.37	899.36	39
Tnfrsf21	C[PPa]FFVDESEPLLR	2/y7	763.37	843.46	39
Tnfrsf21	C[PPa]FFVDESEPLLR	2/y8	763.37	958.48	39
Tnfrsf21	DIYQFLC[PPa]NASER	2/b6	765.36	780.39	39
Tnfrsf21	DIYQFLC[PPa]NASER	2/y6	765.36	750.32	38.676
Tnfrsf21	DIYQFLC[PPa]NASER	2/y7	765.36	863.4	39
Tnfrsf21	EVAAFSNGYTADHER	2/b9	833.88	939.42	42
Tnfrsf21	EVAAFSNGYTADHER	2/y7	833.88	891.4	42
Tnfrsf21	EVAAFSNGYTADHER	2/y8	833.88	948.42	42
Tnfrsf21	GPEASLAQLISALR	2/y7	713.41	800.5	36
Tnfrsf21	GPEASLAQLISALR	2/y8	713.41	871.54	36
Tnfrsf21	GPEASLAQLISALR	2/y9	713.41	984.62	36
Tnfrsf21	GTENEDVR	2/y4	460.21	518.26	25
Tnfrsf21	GTENEDVR	2/y5	460.21	632.3	25
Tnfrsf21	GTENEDVR	2/y6	460.21	761.34	25
Tnfrsf21	KGTENEDVR	2/b7	524.26	774.33	28
Tnfrsf21	KGTENEDVR	2/y7	524.26	862.39	28
Tnfrsf21	KGTENEDVR	2/y8	524.26	919.41	28
Tnfrsf21	KKGTENEDVR	2/b7	588.3	787.39	31
Tnfrsf21	KKGTENEDVR	2/b8	588.3	902.42	31
Tnfrsf21	KKGTENEDVR	2/y8	588.3	919.41	31
Tnfrsf21	LENSTLLTVEPSPLDK	2/b9	878.47	971.54	44
Tnfrsf21	LENSTLLTVEPSPLDK	2/y8	878.47	884.47	44
Tnfrsf21	LENSTLLTVEPSPLDK	2/y9	878.47	985.52	44
Tnfrsf21	LFEIIGVK	2/y5	459.79	529.37	25
Tnfrsf21	LFEIIGVK	2/y6	459.79	658.41	25
Tnfrsf21	LFEIIGVK	2/y7	459.79	805.48	25
Tnfrsf21	LPC[PPa]AALTDR	2/y5	515.77	575.31	28
Tnfrsf21	LPC[PPa]AALTDR	2/y6	515.77	646.35	28
Tnfrsf21	LPC[PPa]AALTDR	2/y7	515.77	820.4	28
Tnfrsf21	LVAAQVGSQWK	2/y5	593.83	605.3	31
Tnfrsf21	LVAAQVGSQWK	2/y6	593.83	704.37	31
Tnfrsf21	LVAAQVGSQWK	2/y9	593.83	974.51	31
Tnfrsf21	RNDVVEK	2/b4	430.24	485.25	24
Tnfrsf21	RNDVVEK	2/b5	430.24	584.32	24
Tnfrsf21	RNDVVEK	2/b6	430.24	713.36	24
Tnfrsf21	SLTPTQNR	2/y4	458.75	518.27	25
Tnfrsf21	SLTPTQNR	2/y5	458.75	615.32	25
Tnfrsf21	SLTPTQNR	2/y6	458.75	716.37	25
Tnfrsf21	SSTAIKAPK	2/y5	451.77	556.38	25
Tnfrsf21	SSTAIKAPK	2/y6	451.77	627.42	25
Tnfrsf21	SSTAIKAPK	2/y7	451.77	728.47	25
Tnfrsf21	TKVPSGIEEGTVPDNTSSTSGK	3/y10	731.03	993.45	41
Tnfrsf21	TKVPSGIEEGTVPDNTSSTSGK	3/y8	731.03	781.37	41
Tnfrsf21	TKVPSGIEEGTVPDNTSSTSGK	3/y9	731.03	896.4	41
Tnfrsf21	TLSLPGTYR	2/y5	504.28	593.3	27
Tnfrsf21	TLSLPGTYR	2/y6	504.28	706.39	27
Tnfrsf21	TLSLPGTYR	2/y7	504.28	793.42	27
Tnfrsf21	VIEEIPQAEDKLDR	3/y10(2)	552.29	592.82	32
Tnfrsf21	VIEEIPQAEDKLDR	3/y11(2)	552.29	657.34	32
Tnfrsf21	VIEEIPQAEDKLDR	3/y12(2)	552.29	721.86	32
Tnfrsf21	VPSGIEEGTVPDNTSSTSGK	3/b9	654.65	870.42	37
Tnfrsf21	VPSGIEEGTVPDNTSSTSGK	3/y10	654.65	993.45	37
Tnfrsf21	VPSGIEEGTVPDNTSSTSGK	3/y9	654.65	896.4	37
Tnfrsf8	APC[PPa]SGNSPR	2/y5	480.22	530.27	26
Tnfrsf8	APC[PPa]SGNSPR	2/y6	480.22	617.3	26
Tnfrsf8	APC[PPa]SGNSPR	2/y7	480.22	791.35	26
Tnfrsf8	C[PPa]TAC[PPa]VTC[PPa]LPGLVEK	3/y6	550.61	642.38	32
Tnfrsf8	C[PPa]TAC[PPa]VTC[PPa]LPGLVEK	3/y7	550.61	755.47	32
Tnfrsf8	C[PPa]TAC[PPa]VTC[PPa]LPGLVEK	3/y8	550.61	929.51	32
Tnfrsf8	DTIC[PPa]ELPSSGSGPNC[PPa]SNPGDR	3/y16(2)	749.99	808.36	41
Tnfrsf8	DTIC[PPa]ELPSSGSGPNC[PPa]SNPGDR	3/y7	749.99	819.34	41
Tnfrsf8	DTIC[PPa]ELPSSGSGPNC[PPa]SNPGDR	3/y8	749.99	933.38	41
Tnfrsf8	KDTIC[PPa]ELPSSGSGPNC[PPa]SNPGDR	3/b7	792.69	874.43	44
Tnfrsf8	KDTIC[PPa]ELPSSGSGPNC[PPa]SNPGDR	3/y7	792.69	819.34	44
Tnfrsf8	KDTIC[PPa]ELPSSGSGPNC[PPa]SNPGDR	3/y8	792.69	933.38	44
Tnfrsf8	KDTIC[PPa]ELPSSGSGPNC[PPa]SNPGDRK	3/b7	835.39	874.43	46
Tnfrsf8	KDTIC[PPa]ELPSSGSGPNC[PPa]SNPGDRK	3/y17(2)	835.39	872.41	46
Tnfrsf8	KDTIC[PPa]ELPSSGSGPNC[PPa]SNPGDRK	3/y8	835.39	947.44	46
Tnfrsf8	KQC[PPa]APDYYVNEDGK	3/b6	567.59	714.32	32
Tnfrsf8	KQC[PPa]APDYYVNEDGK	3/b7	567.59	877.39	32
Tnfrsf8	KQC[PPa]APDYYVNEDGK	3/y6	567.59	661.32	32
Tnfrsf8	LHC[PPa]SGEEVVK	2/b8	586.29	926.4	31
Tnfrsf8	LHC[PPa]SGEEVVK	2/y7	586.29	747.39	31
Tnfrsf8	LHC[PPa]SGEEVVK	2/y8	586.29	921.43	31
Tnfrsf8	NC[PPa]C[PPa]YQC[PPa]PSGLSPTQPC[PPa]PR	3/b5	746.66	754.26	41
Tnfrsf8	NC[PPa]C[PPa]YQC[PPa]PSGLSPTQPC[PPa]PR	3/y7	746.66	869.43	41
Tnfrsf8	NC[PPa]C[PPa]YQC[PPa]PSGLSPTQPC[PPa]PR	3/y8	746.66	956.46	41
Tnfrsf8	QC[PPa]APDYYVNEDGK	2/y7	786.84	824.38	40
Tnfrsf8	QC[PPa]APDYYVNEDGK	2/y8	786.84	987.44	40
Tnfrsf8	QC[PPa]APDYYVNEDGK	3/y6	524.89	661.32	30
Tnfrsf8	TLTSHATPQAMPTLESPANDSAR	3/b9	799.39	937.47	44
Tnfrsf8	TLTSHATPQAMPTLESPANDSAR	3/y8	799.39	817.38	44
Tnfrsf8	TLTSHATPQAMPTLESPANDSAR	3/y9	799.39	946.42	44
Tnfrsf8	TTC[PPa]AGDLSHYPGEAAR	3/y12(2)	573.93	636.8	33
Tnfrsf8	TTC[PPa]AGDLSHYPGEAAR	3/y14(2)	573.93	759.34	33
Tnfrsf8	TTC[PPa]AGDLSHYPGEAAR	3/y6	573.93	600.31	33
Tnfrsf8	VTNLVQEDATELVK	3/y6	520.28	660.39	30
Tnfrsf8	VTNLVQEDATELVK	3/y7	520.28	775.42	30
Tnfrsf8	VTNLVQEDATELVK	3/y8	520.28	904.46	30
Tnfsf10	DLSFSQHFR	2/y5	568.78	674.34	30
Tnfsf10	DLSFSQHFR	2/y6	568.78	821.41	30
Tnfsf10	DLSFSQHFR	2/y7	568.78	908.44	30
Tnfsf10	GHSFLNHVLFR	3/b6	442.91	656.32	26
Tnfsf10	GHSFLNHVLFR	3/y3	442.91	435.27	26.145
Tnfsf10	GHSFLNHVLFR	3/y4	442.91	534.34	26
Tnfsf10	GHSFLNHVLFR	3/y9(2)	442.91	566.82	26
Tnfsf10	IESWESSR	2/y5	497.24	664.3	27
Tnfsf10	IESWESSR	2/y6	497.24	751.34	27
Tnfsf10	IESWESSR	2/y7	497.24	880.38	27
Tnfsf10	IGLAC[PPa]FSK	2/y5	455.25	626.3	25
Tnfsf10	IGLAC[PPa]FSK	2/y6	455.25	739.38	25
Tnfsf10	IGLAC[PPa]FSK	2/y7	455.25	796.4	25
Tnfsf10	KGHSFLNHVLFR	3/y4	485.61	534.34	28
Tnfsf10	KGHSFLNHVLFR	3/y5	485.61	671.4	28
Tnfsf10	KGHSFLNHVLFR	3/y6	485.61	785.44	28
Tnfsf10	QLSTPPLPR	2/y5	504.8	579.36	27
Tnfsf10	QLSTPPLPR	2/y6	504.8	680.41	27
Tnfsf10	QLSTPPLPR	2/y7	504.8	767.44	27
Tnfsf10	QLVQYIYK	2/y4	527.8	586.32	28
Tnfsf10	QLVQYIYK	2/y5	527.8	714.38	28
Tnfsf10	QLVQYIYK	2/y6	527.8	813.45	28
Tnfsf10	SNSALIPISK	2/y4	515.3	444.28	27.673
Tnfsf10	SNSALIPISK	2/y5	515.3	557.37	28
Tnfsf10	SNSALIPISK	2/y6	515.3	670.45	28
Tnfsf10	SNSALIPISK	2/y8	515.3	828.52	28
Tnfsf10	SNSALIPISKDGK	2/y7	665.37	744.43	34
Tnfsf10	SNSALIPISKDGK	2/y8	665.37	857.51	34
Tnfsf10	SNSALIPISKDGK	2/y9	665.37	970.59	34
Tnfsf10	TFQDTISTVPEK	2/y6	683.35	660.36	35.067
Tnfsf10	TFQDTISTVPEK	2/y7	683.35	773.44	35
Tnfsf10	TFQDTISTVPEK	2/y8	683.35	874.49	35
Tnfsf10	TFQDTISTVPEK	2/y9	683.35	989.51	35
Tnfsf10	TKQLVQYIYK	2/y5	642.37	714.38	33
Tnfsf10	TKQLVQYIYK	2/y6	642.37	813.45	33
Tnfsf10	TKQLVQYIYK	2/y7	642.37	926.53	33
Tnfsf11	ELQHIVGPQR	2/b5	588.83	621.34	31
Tnfsf11	ELQHIVGPQR	2/b6	588.83	720.4	31
Tnfsf11	ELQHIVGPQR	2/y7	588.83	806.46	31
Tnfsf11	GKPEAQPFAHLTINAASIPSGSHK	3/y10	820.1	954.5	45
Tnfsf11	GKPEAQPFAHLTINAASIPSGSHK	3/y18(2)	820.1	924.49	45
Tnfsf11	GKPEAQPFAHLTINAASIPSGSHK	3/y6	820.1	612.31	45.005
Tnfsf11	GKPEAQPFAHLTINAASIPSGSHK	3/y8	820.1	812.43	45.005
Tnfsf11	GKPEAQPFAHLTINAASIPSGSHK	3/y9	820.1	883.46	45
Tnfsf11	ISEDSTHC[PPa]FYR	2/y5	714.81	796.36	36
Tnfsf11	ISEDSTHC[PPa]FYR	2/y6	714.81	897.4	36
Tnfsf11	ISEDSTHC[PPa]FYR	2/y7	714.81	984.44	36
Tnfsf11	QAFQGAVQK	2/y5	488.76	502.3	27
Tnfsf11	QAFQGAVQK	2/y6	488.76	630.36	27
Tnfsf11	QAFQGAVQK	2/y7	488.76	777.43	27
Tnfsf11	VTLSSWYHDR	3/y3	421.88	427.2	25
Tnfsf11	VTLSSWYHDR	3/y4	421.88	590.27	25
Tnfsf11	VTLSSWYHDR	3/y5	421.88	776.35	25
Tnfsf11	VTLSSWYHDR	3/y6	421.88	863.38	25.094
Tnfsf8	APLKGGNC[PPa]SEDLFC[PPa]TLK	3/y5	646.65	682.36	36
Tnfsf8	APLKGGNC[PPa]SEDLFC[PPa]TLK	3/y6	646.65	795.44	36
Tnfsf8	APLKGGNC[PPa]SEDLFC[PPa]TLK	3/y7	646.65	910.47	36
Tnfsf8	DSTPNTTEKAPLK	3/y10(2)	467.91	549.81	27
Tnfsf8	DSTPNTTEKAPLK	3/y11(2)	467.91	600.34	27
Tnfsf8	DSTPNTTEKAPLK	3/y9(2)	467.91	501.28	27
Tnfsf8	GGNC[PPa]SEDLFC[PPa]TLK	2/y7	764.84	910.47	39
Tnfsf8	GGNC[PPa]SEDLFC[PPa]TLK	3/y4	510.23	535.29	30
Tnfsf8	GGNC[PPa]SEDLFC[PPa]TLK	3/y5	510.23	682.36	30
Tnfsf8	KQTLVTVC[PPa]ESGVQSK	2/y8	839.45	908.41	42
Tnfsf8	KQTLVTVC[PPa]ESGVQSK	3/b6	559.97	671.41	32
Tnfsf8	KQTLVTVC[PPa]ESGVQSK	3/b7	559.97	770.48	31.998
Tnfsf8	KQTLVTVC[PPa]ESGVQSK	3/y6	559.97	605.33	32
Tnfsf8	QTLVTVC[PPa]ESGVQSK	2/y8	775.4	908.41	39
Tnfsf8	QTLVTVC[PPa]ESGVQSK	3/y6	517.27	605.33	30
Tnfsf8	QTLVTVC[PPa]ESGVQSK	3/y7	517.27	734.37	30
Tnfsf8	SWAYLQVSK	2/y5	541.29	574.36	29
Tnfsf8	SWAYLQVSK	2/y6	541.29	737.42	29
Tnfsf8	SWAYLQVSK	2/y7	541.29	808.46	29
Tnfsf9	AYLHGAQDAYR	3/y4	422.21	524.25	25
Tnfsf9	AYLHGAQDAYR	3/y7	422.21	780.36	25
Tnfsf9	AYLHGAQDAYR	3/y8(2)	422.21	459.21	25
Tnfsf9	DREAAWPPALNFC[PPa]SR	3/b6	601.96	729.33	34
Tnfsf9	DREAAWPPALNFC[PPa]SR	3/y5	601.96	697.31	34
Tnfsf9	DREAAWPPALNFC[PPa]SR	3/y8	601.96	978.48	34
Tnfsf9	EAAWPPALNFC[PPa]SR	2/y6	766.87	810.39	39
Tnfsf9	EAAWPPALNFC[PPa]SR	2/y7	766.87	881.43	39
Tnfsf9	EAAWPPALNFC[PPa]SR	2/y8	766.87	978.48	39
Tnfsf9	EAAWPPALNFC[PPa]SR	2/y9(2)	766.87	538.55	38.742
Tnfsf9	LSPTFTNTGHK	2/y7	601.81	804.4	31
Tnfsf9	LSPTFTNTGHK	2/y6	601.81	657.33	31
Tnfsf9	LSPTFTNTGHK	2/y8	601.81	905.45	31
Tnfsf9	HPAGTSC[PPa]PSDAALLR	3/b7	522.93	725.3	30
Tnfsf9	HPAGTSC[PPa]PSDAALLR	3/y6	522.93	658.39	30
Tnfsf9	HPAGTSC[PPa]PSDAALLR	3/y8	522.93	842.47	30
Tnfsf9	SWSQLLLLK	2/y5	544.33	599.45	29
Tnfsf9	SWSQLLLLK	2/y6	544.33	727.51	29
Tnfsf9	SWSQLLLLK	2/y7	544.33	814.54	29
Tnfsf9	TEPRPALTITTSPNLGTR	3/y6	642.35	657.37	36
Tnfsf9	TEPRPALTITTSPNLGTR	3/y7	642.35	744.4	36.118
Tnfsf9	TEPRPALTITTSPNLGTR	3/y8	642.35	845.45	36
Tnfsf9	TEPRPALTITTSPNLGTR	3/y9	642.35	946.5	36
Glra2	ATPANPLPQPPK	2/y7	615.85	776.47	32
Glra2	ATPANPLPQPPK	2/y8	615.85	890.51	32
Glra2	ATPANPLPQPPK	2/y9	615.85	961.55	32
Glra2	ATPANPLPQPPKDADAIK	2/b9	922.5	890.47	45.59
Glra2	ATPANPLPQPPKDADAIK	2/y14(2)	922.5	752.46	45.59
Glra2	ATPANPLPQPPKDADAIK	2/y9	922.5	954.53	46
Glra2	EAFC[PPa]KDHDSR	2/b6	639.78	765.32	33
Glra2	EAFC[PPa]KDHDSR	2/y6	639.78	757.36	33
Glra2	EAFC[PPa]KDHDSR	2/y7	639.78	931.41	33
Glra2	EEKELGYC[PPa]TK	2/y5	635.8	642.29	33
Glra2	EEKELGYC[PPa]TK	2/y6	635.8	755.38	33
Glra2	EEKELGYC[PPa]TK	2/y7	635.8	884.42	33
Glra2	FTC[PPa]IEVK	2/y4	455.74	488.31	25
Glra2	FTC[PPa]IEVK	2/y5	455.74	662.35	25
Glra2	FTC[PPa]IEVK	2/y6	455.74	763.4	25
Glra2	GANFHDVTTDNK	3/y10(2)	440.21	595.78	26
Glra2	GANFHDVTTDNK	3/y4	440.21	477.23	26
Glra2	GANFHDVTTDNK	3/y5	440.21	578.28	26
Glra2	GANFHDVTTDNKLLR	3/b7	567.63	741.33	32
Glra2	GANFHDVTTDNKLLR	3/y5	567.63	643.42	32
Glra2	GANFHDVTTDNKLLR	3/y7	567.63	859.5	32
Glra2	HPSQTLSPSDFLDK	3/b5	524.59	551.26	30
Glra2	HPSQTLSPSDFLDK	3/y7	524.59	821.4	30
Glra2	HPSQTLSPSDFLDK	3/y8	524.59	908.44	30
Glra2	QHKEFLR	2/y4	479.27	564.31	26
Glra2	QHKEFLR	2/y5	479.27	692.41	26
Glra2	QHKEFLR	2/y6	479.27	829.47	26
Glra2	[PGQ]-QNKEEDVTR	2/b6	551.26	727.29	29
Glra2	[PGQ]-QNKEEDVTR	2/y5	551.26	619.3	29
Glra2	[PGQ]-QNKEEDVTR	2/y6	551.26	748.35	29
Glra2	QNKEEDVTR	2/y5	559.78	619.3	30
Glra2	QNKEEDVTR	2/y6	559.78	748.35	30
Glra2	QNKEEDVTR	2/y7	559.78	876.44	30
Glra2	RQNKEEDVTR	3/b4	425.55	527.3	25
Glra2	RQNKEEDVTR	3/y4	425.55	490.26	25
Glra2	RQNKEEDVTR	3/y5	425.55	619.3	25
Glra2	SGKHPSQTLSPSDFLDK	3/b8	615.31	823.41	35
Glra2	SGKHPSQTLSPSDFLDK	3/y7	615.31	821.4	35
Glra2	SGKHPSQTLSPSDFLDK	3/y8	615.31	908.44	35
Glra4	DEKDLGYC[PPa]TK	3/y3	414.86	422.21	25
Glra4	DEKDLGYC[PPa]TK	3/y4	414.86	585.27	25
Glra4	DEKDLGYC[PPa]TK	3/y5	414.86	642.29	25
Glra4	FTC[PPa]IEVK	2/y4	455.74	488.31	25
Glra4	FTC[PPa]IEVK	2/y5	455.74	662.35	25
Glra4	FTC[PPa]IEVK	2/y6	455.74	763.4	25
Glra4	GANFHEVTTDNK	3/y10(2)	444.88	602.78	26
Glra4	GANFHEVTTDNK	3/y5	444.88	578.28	26
Glra4	GANFHEVTTDNK	3/y8(2)	444.88	472.23	26
Glra4	GSQPMSPSDFLDK	2/y6	704.82	724.35	36
Glra4	GSQPMSPSDFLDK	2/y7	704.82	821.4	36
Glra4	GSQPMSPSDFLDK	2/y8	704.82	908.44	36
Glra4	NGNVLYSIR	2/y4	518.28	538.3	28
Glra4	NGNVLYSIR	2/y5	518.28	651.38	28
Glra4	NGNVLYSIR	2/y6	518.28	750.45	28
Glra4	QQWNDPR	2/b5	472.22	672.27	26
Glra4	QQWNDPR	2/y4	472.22	501.24	26
Glra4	QQWNDPR	2/y5	472.22	687.32	26
Glra4	VLLSVALAK	2/y6	457.31	588.37	25
Glra4	VLLSVALAK	2/y7	457.31	701.46	25
Glra4	VLLSVALAK	2/y8	457.31	814.54	25
Glra4	VLLSVALAKEDVK	3/y10(2)	462.29	530.31	27
Glra4	VLLSVALAKEDVK	3/y12(2)	462.29	643.39	27
Glra4	VLLSVALAKEDVK	3/y6	462.29	689.38	27
Glrb	EDIEYGNC[PPa]TK	2/y5	621.77	593.27	32.358
Glrb	EDIEYGNC[PPa]TK	2/y6	621.77	756.33	32
Glrb	EDIEYGNC[PPa]TK	2/y7	621.77	885.38	32
Glrb	EDIEYGNC[PPa]TK	2/y8	621.77	998.46	32
Glrb	FIWQSGDPVQLEK	2/y6	773.9	713.42	39.052
Glrb	FIWQSGDPVQLEK	2/y7	773.9	828.45	39
Glrb	FIWQSGDPVQLEK	2/y8	773.9	885.47	39
Glrb	FIWQSGDPVQLEK	2/y9	773.9	972.5	39
Glrb	IALPQFDIK	2/y6	522.81	747.4	28
Glrb	IALPQFDIK	2/y7	522.81	860.49	28
Glrb	IALPQFDIK	2/y8	522.81	931.52	28
Glrb	KEDIEYGNC[PPa]TK	3/b4	457.55	486.26	27
Glrb	KEDIEYGNC[PPa]TK	3/y5	457.55	593.27	27
Glrb	KEDIEYGNC[PPa]TK	3/y6	457.55	756.33	27
Glrb	KNTVNGTGTPVHISTLQVGETR	4/b15(2)	578.06	754.4	32
Glrb	KNTVNGTGTPVHISTLQVGETR	4/y5	578.06	561.3	31.903
Glrb	KNTVNGTGTPVHISTLQVGETR	4/y6	578.06	689.36	32
Glrb	KNTVNGTGTPVHISTLQVGETR	4/y7	578.06	802.44	32
Glrb	KPPPAKPVIPTAAK	3/y13(2)	472.3	643.9	28
Glrb	KPPPAKPVIPTAAK	3/y5	472.3	487.29	28
Glrb	KPPPAKPVIPTAAK	3/y8	472.3	796.49	28
Glrb	LLVSYDPR	2/y5	481.77	637.29	26
Glrb	LLVSYDPR	2/y6	481.77	736.36	26
Glrb	LLVSYDPR	2/y7	481.77	849.45	26
Glrb	NKKPPPAKPVIPTAAK	3/y13(2)	553.01	643.9	32
Glrb	NKKPPPAKPVIPTAAK	3/y6	553.01	600.37	32
Glrb	NKKPPPAKPVIPTAAK	3/y8	553.01	796.49	32
Glrb	NTVNGTGTPVHISTLQVGETR	3/y16(2)	727.71	848.45	40
Glrb	NTVNGTGTPVHISTLQVGETR	3/y17(2)	727.71	876.97	40
Glrb	NTVNGTGTPVHISTLQVGETR	3/y9	727.71	990.52	40
Glrb	RIDLYAR	2/b5	453.76	661.37	25
Glrb	RIDLYAR	2/b6	453.76	732.4	25
Glrb	RIDLYAR	2/y4	453.76	522.3	25
Glrb	SNDFSIVGSLPR	2/y7	646.34	741.46	33
Glrb	SNDFSIVGSLPR	2/y8	646.34	828.49	33
Glrb	SNDFSIVGSLPR	2/y9	646.34	975.56	33
Glrb	VPPNSTSNILNR	2/y11(2)	656.35	607.08	33.88
Glrb	VPPNSTSNILNR	3/b8	437.91	797.38	26
Glrb	VPPNSTSNILNR	3/y10(2)	437.91	558.29	26
Glrb	VPPNSTSNILNR	3/y4	437.91	515.33	26
Gabra1	AEVVYEWTR	2/y5	576.79	754.35	30
Gabra1	AEVVYEWTR	2/y6	576.79	853.42	30
Gabra1	AEVVYEWTR	2/y7	576.79	952.49	30
Gabra1	EVKPETKPPEPK	2/b7	689.88	812.45	35
Gabra1	EVKPETKPPEPK	2/b8	689.88	909.5	35
Gabra1	EVKPETKPPEPK	2/y10(2)	689.88	575.91	35.355
Gabra1	EVKPETKPPEPK	2/y5	689.88	567.31	35.355
Gabra1	EVKPETKPPEPK	2/y8	689.88	925.5	35
Gabra1	FGSYAYTR	2/y4	482.73	510.27	26
Gabra1	FGSYAYTR	2/y5	482.73	673.33	26.24
Gabra1	FGSYAYTR	2/y6	482.73	760.36	26
Gabra1	FGSYAYTR	2/y7	482.73	817.38	26
Gabra1	GDPGLATIAK	2/y5	471.77	503.32	26
Gabra1	GDPGLATIAK	2/y6	471.77	616.4	25.758
Gabra1	GDPGLATIAK	2/y7	471.77	673.42	26
Gabra1	GDPGLATIAK	2/y8	471.77	770.48	26
Gabra1	IWTPDTFFHNGK	3/y10(2)	488.24	582.28	28
Gabra1	IWTPDTFFHNGK	3/y5	488.24	602.3	28
Gabra1	IWTPDTFFHNGK	3/y9(2)	488.24	531.75	28
Gabra1	IWTPDTFFHNGKK	3/y10(2)	530.94	595.8	31
Gabra1	IWTPDTFFHNGKK	3/y11(2)	530.94	646.33	31
Gabra1	IWTPDTFFHNGKK	3/y6	530.94	730.4	31
Gabra1	KNNTYAPTATSYTPNLAR	3/b6	661.67	692.34	37
Gabra1	KNNTYAPTATSYTPNLAR	3/y6	661.67	671.38	37
Gabra1	KNNTYAPTATSYTPNLAR	3/y7	661.67	834.45	37
Gabra1	KTFNSVSK	2/b6	455.75	677.36	25
Gabra1	KTFNSVSK	2/y6	455.75	681.36	25
Gabra1	KTFNSVSK	2/y7	455.75	782.4	25
Gabra1	LLDGYDNR	2/y5	483.24	624.27	26
Gabra1	LLDGYDNR	2/y6	483.24	739.3	26
Gabra1	LLDGYDNR	2/y7	483.24	852.38	26
Gabra1	LRPGLGER	2/b6	449.27	594.37	25
Gabra1	LRPGLGER	2/b7	449.27	723.41	25
Gabra1	LRPGLGER	2/y6	449.27	628.34	25
Gabra1	NNTYAPTATSYTPNLAR	3/y6	618.97	671.38	35
Gabra1	NNTYAPTATSYTPNLAR	3/y7	618.97	834.45	35
Gabra1	NNTYAPTATSYTPNLAR	3/y8	618.97	921.48	35
Gabra1	SVVPEKPK	2/y4	442.27	501.3	24
Gabra1	SVVPEKPK	2/y5	442.27	598.36	24
Gabra1	SVVPEKPK	2/y6	442.27	697.42	24
Gabra1	SVVVAEDGSR	2/y6	509.76	634.28	27
Gabra1	SVVVAEDGSR	2/y7	509.76	733.35	27
Gabra1	SVVVAEDGSR	2/y8	509.76	832.42	27
Gabra1	SYGQPSQDELKDNTTVFTR	3/y14(2)	729.35	827.41	40
Gabra1	SYGQPSQDELKDNTTVFTR	3/y17(2)	729.35	968.47	40
Gabra1	SYGQPSQDELKDNTTVFTR	3/y8	729.35	953.47	40
Gabra1	VKDPLIK	2/y4	406.77	470.33	23
Gabra1	VKDPLIK	2/y5	406.77	585.36	23
Gabra1	VKDPLIK	2/y6	406.77	713.46	23
Gabra1	VKDPLIKK	2/b6	470.81	666.42	26
Gabra1	VKDPLIKK	2/y5	470.81	598.43	26
Gabra1	VKDPLIKK	2/y6	470.81	713.46	26
Gabra2	DPVLSTISK	2/y5	480.27	535.31	26
Gabra2	DPVLSTISK	2/y6	480.27	648.39	26
Gabra2	DPVLSTISK	2/y7	480.27	747.46	26
Gabra2	KPENKPAEAK	2/b8	556.31	894.47	29
Gabra2	KPENKPAEAK	2/y8	556.31	886.46	29
Gabra2	KPENKPAEAK	2/y9	556.31	983.52	29
Gabra2	KTFNSVSK	2/b7	455.75	764.39	25
Gabra2	LNQYDLLGQSIGK	2/y9	724.89	930.53	37
Gabra2	LNQYDLLGQSIGK	3/b5	483.6	634.28	28.18
Gabra2	LNQYDLLGQSIGK	3/y6	483.6	589.33	28
Gabra2	LNQYDLLGQSIGK	3/y7	483.6	702.41	28
Gabra2	LVLANIQEDEAK	2/y6	671.86	719.32	35
Gabra2	LVLANIQEDEAK	2/y7	671.86	832.4	34.562
Gabra2	LVLANIQEDEAK	2/y8	671.86	946.45	35
Gabra2	LVLANIQEDEAK	3/b5	448.25	511.32	26.412
Gabra2	LVLANIQEDEAK	3/y5	448.25	591.26	26
Gabra2	NNITIFTR	2/y4	489.77	536.32	27
Gabra2	NNITIFTR	2/y5	489.77	637.37	27
Gabra2	NNITIFTR	2/y6	489.77	750.45	27
Gabra2	RGWAWDGK	2/b5	488.24	657.33	26
Gabra2	RGWAWDGK	2/b6	488.24	772.35	26
Gabra2	RGWAWDGK	2/b7	488.24	829.37	26
Gabra2	SATTPEPNK	2/y5	472.74	584.3	26
Gabra2	SATTPEPNK	2/y6	472.74	685.35	26
Gabra2	SATTPEPNK	2/y7	472.74	786.4	26
Gabra3	ATYVQDSPAETK	2/y7	655.32	747.35	34
Gabra3	ATYVQDSPAETK	2/y8	655.32	875.41	34
Gabra3	ATYVQDSPAETK	2/y9	655.32	974.48	34
Gabra3	DTEFSTISK	2/y5	514.25	535.31	28
Gabra3	DTEFSTISK	2/y6	514.25	682.38	28
Gabra3	DTEFSTISK	2/y7	514.25	811.42	28
Gabra3	FGSYAYTK	2/y4	468.73	482.26	26
Gabra3	FGSYAYTK	2/y6	468.73	732.36	26
Gabra3	FGSYAYTK	2/y7	468.73	789.38	26
Gabra3	HAPDIPDDSTDNITIFTR	3/y5	676.66	637.37	37.833
Gabra3	HAPDIPDDSTDNITIFTR	3/y6	676.66	750.45	38
Gabra3	HAPDIPDDSTDNITIFTR	3/y7	676.66	864.49	38
Gabra3	HAPDIPDDSTDNITIFTR	3/y8	676.66	979.52	38
Gabra3	ILPLNNLLASK	2/y7	598.37	759.44	31
Gabra3	ILPLNNLLASK	2/y8	598.37	872.52	31
Gabra3	ILPLNNLLASK	2/y9	598.37	969.57	31
Gabra3	KKTPAAPTK	2/b8	471.29	795.47	26
Gabra3	KKTPAAPTK	2/y7	471.29	685.39	26
Gabra3	KKTPAAPTK	2/y8	471.29	813.48	26
Gabra3	KTPAAPTKK	2/b8	471.29	795.47	26
Gabra3	KTPAAPTKK	2/y7	471.29	712.44	26
Gabra3	LRPGLGDAVTEVK	3/b7	452.26	709.4	27
Gabra3	LRPGLGDAVTEVK	3/y4	452.26	476.27	27
Gabra3	LRPGLGDAVTEVK	3/y5	452.26	575.34	27
Gabra3	NTTFNIVGTTYPINLAK	2/b6	934	691.34	46.096
Gabra3	NTTFNIVGTTYPINLAK	2/b9	934	948.48	46
Gabra3	NTTFNIVGTTYPINLAK	2/y6	934	655.41	46.096
Gabra3	NTTFNIVGTTYPINLAK	2/y7	934	818.48	46.096
Gabra3	QDIGGLSPK	2/b7	457.75	671.34	25
Gabra3	QDIGGLSPK	2/y5	457.75	501.3	25
Gabra3	QDIGGLSPK	2/y6	457.75	558.32	25
Gabra3	RQEPGDFVK	2/b6	538.28	683.31	29
Gabra3	RQEPGDFVK	2/b7	538.28	830.38	29
Gabra3	RQEPGDFVK	2/b8	538.28	929.45	29
Gabra3	SAAAPSASSTPTAIASPK	3/y6	538.95	586.36	31
Gabra3	SAAAPSASSTPTAIASPK	3/y7	538.95	687.4	31
Gabra3	SAAAPSASSTPTAIASPK	3/y8	538.95	784.46	31
Gabra3	SVEVAQDGSR	2/y6	524.26	633.3	28
Gabra3	SVEVAQDGSR	2/y7	524.26	732.36	28
Gabra3	SVEVAQDGSR	2/y8	524.26	861.41	28
Gabra3	TPAAPTKK	2/y4	407.24	473.31	23
Gabra3	TPAAPTKK	2/y5	407.24	544.35	23
Gabra3	TPAAPTKK	2/y6	407.24	615.38	23
Gabra4	AHLASSPN[Dea]PFSR	2/b8	642.82	779.37	33
Gabra4	AHLASSPN[Dea]PFSR	2/y8	642.82	892.42	33
Gabra4	AHLASSPN[Dea]PFSR	2/y9	642.82	963.45	33
Gabra4	AHLASSPNPFSR	2/y6	642.33	717.37	33.262
Gabra4	AHLASSPNPFSR	2/y8	642.33	891.43	33.262
Gabra4	AHLASSPNPFSR	2/y9	642.33	962.47	33
Gabra4	AHLASSPNPFSR	3/b6	428.55	567.29	25
Gabra4	AHLASSPNPFSR	3/f549	428.55	549.24	25.428
Gabra4	AHLASSPNPFSR	3/y4	428.55	506.27	25
Gabra4	DEKLC[PPa]PENFTR	2/y6	711.84	763.37	36
Gabra4	DEKLC[PPa]PENFTR	2/y7	711.84	937.42	36
Gabra4	FGSYAYPK	2/y5	466.73	641.33	26
Gabra4	FGSYAYPK	2/y6	466.73	728.36	26
Gabra4	FGSYAYPK	2/y7	466.73	785.38	26
Gabra4	ILDSLLDGYDNR	2/y6	697.35	739.3	36
Gabra4	ILDSLLDGYDNR	2/y7	697.35	852.38	36
Gabra4	ILDSLLDGYDNR	2/y8	697.35	965.47	36
Gabra4	ISKPPPEVPAAPVLK	3/b7	514.98	749.42	30
Gabra4	ISKPPPEVPAAPVLK	3/y5	514.98	527.36	30
Gabra4	ISKPPPEVPAAPVLK	3/y7	514.98	695.45	30
Gabra4	KISKPPPEVPAAPVLK	3/b12(2)	557.68	608.36	32
Gabra4	KISKPPPEVPAAPVLK	3/b9	557.68	976.58	32
Gabra4	KISKPPPEVPAAPVLK	3/y7	557.68	695.45	32
Gabra4	LC[PPa]PENFTR	2/y4	525.76	537.28	28
Gabra4	LC[PPa]PENFTR	2/y5	525.76	666.32	28
Gabra4	LC[PPa]PENFTR	2/y6	525.76	763.37	28
Gabra4	LKYDGPIEILR	2/y6	658.88	740.47	33.991
Gabra4	LKYDGPIEILR	2/y7	658.88	797.49	33.991
Gabra4	LKYDGPIEILR	2/y8	658.88	912.51	33.991
Gabra4	LKYDGPIEILR	3/b5	439.59	577.3	26
Gabra4	LKYDGPIEILR	3/y4	439.59	530.33	26
Gabra4	LKYDGPIEILR	3/y5	439.59	643.41	26
Gabra4	LRPGFGGPVTEVK	3/b7	452.93	685.38	27
Gabra4	LRPGFGGPVTEVK	3/y4	452.93	476.27	27
Gabra4	LRPGFGGPVTEVK	3/y6	452.93	672.39	27
Gabra4	RTNALVHSESDVK	2/b7	728.38	792.45	37
Gabra4	RTNALVHSESDVK	2/b8	728.38	879.48	37
Gabra4	RTNALVHSESDVK	2/y7	728.38	801.37	37
Gabra4	SRTEVGNHSSK	3/b4	401.2	474.23	24
Gabra4	SRTEVGNHSSK	3/b7	401.2	744.36	24
Gabra4	SRTEVGNHSSK	3/y6	401.2	629.3	24
Gabra4	SVEVPKESSSLVQYDLIGQTVSSETIK	3/y18(2)	975.18	991.03	53
Gabra4	SVEVPKESSSLVQYDLIGQTVSSETIK	3/y9	975.18	992.53	53
Gabra4	TNALVHSESDVK	2/y6	650.33	664.31	34
Gabra4	TNALVHSESDVK	2/y7	650.33	801.37	34
Gabra4	TNALVHSESDVK	2/y8	650.33	900.44	34
Gabra4	TNALVHSESDVKSR	3/y10(2)	514.93	572.29	30
Gabra4	TNALVHSESDVKSR	3/y12(2)	514.93	664.35	30
Gabra4	TNALVHSESDVKSR	3/y13(2)	514.93	721.37	30
Gabra4	TSAVQESSEATPK	2/y7	667.83	719.36	34
Gabra4	TSAVQESSEATPK	2/y8	667.83	848.4	34
Gabra4	TSAVQESSEATPK	2/y9	667.83	976.46	34
Gabra4	TTVNTTGAAGNVSATPPPPAPPPSGSGTSK	3/b11	907.12	988.47	49
Gabra4	TTVNTTGAAGNVSATPPPPAPPPSGSGTSK	3/y10	907.12	914.46	49
Gabra4	TTVNTTGAAGNVSATPPPPAPPPSGSGTSK	3/y11	907.12	985.49	49
Gabra4	YDGPIEILR	2/y6	538.29	740.47	29
Gabra4	YDGPIEILR	2/y7	538.29	797.49	29
Gabra4	YDGPIEILR	2/y8	538.29	912.51	29
Gabra5	ASEEKTAESKK	3/y10(2)	403.21	568.79	24
Gabra5	ASEEKTAESKK	3/y6	403.21	663.37	24
Gabra5	ASEEKTAESKK	3/y9(2)	403.21	525.28	24
Gabra5	EQPPAGTANAPTVSIK	3/y6	527.61	644.4	30
Gabra5	EQPPAGTANAPTVSIK	3/y7	527.61	829.48	30
Gabra5	EQPPAGTANAPTVSIK	3/y8	527.61	715.43	30.381
Gabra5	ILDGLLDGYDNR	2/y6	682.35	739.3	35
Gabra5	ILDGLLDGYDNR	2/y7	682.35	852.38	35
Gabra5	ILDGLLDGYDNR	2/y8	682.35	965.47	35
Gabra5	IWTPDTFFHNGK	2/y6	731.86	749.37	37
Gabra5	IWTPDTFFHNGK	2/y7	731.86	850.42	37
Gabra5	IWTPDTFFHNGK	2/y8	731.86	965.45	37
Gabra5	KTYN[Dea]SISK	2/b6	471.25	708.36	26
Gabra5	KTYN[Dea]SISK	2/y6	471.25	712.35	26
Gabra5	KTYN[Dea]SISK	2/y7	471.25	813.4	26
Gabra5	LEDDGTLLYTMR	2/y6	713.85	796.44	36
Gabra5	LEDDGTLLYTMR	2/y7	713.85	897.49	36.409
Gabra5	LEDDGTLLYTMR	2/y8	713.85	954.51	36.409
Gabra5	LEDDGTLLYTMR	3/y4	476.23	570.27	28
Gabra5	LEDDGTLLYTMR	3/y5	476.23	683.35	28
Gabra5	LPLNNLLASK	2/y7	541.83	759.44	29
Gabra5	LPLNNLLASK	2/y8	541.83	872.52	29
Gabra5	LPLNNLLASK	2/y9	541.83	969.57	29
Gabra5	LTHPPNIPK	2/b7	508.8	773.43	27
Gabra5	LTHPPNIPK	2/y6	508.8	665.4	27
Gabra5	LTHPPNIPK	2/y7	508.8	802.46	27
Gabra5	LTHPPNIPKEQPPAGTANAPTVSIK	4/b7	645.36	773.43	35
Gabra5	LTHPPNIPKEQPPAGTANAPTVSIK	4/y7	645.36	715.43	35
Gabra5	LTHPPNIPKEQPPAGTANAPTVSIK	4/y8	645.36	829.48	35
Gabra5	RGWAWDGK	2/b5	488.24	657.33	26
Gabra5	RGWAWDGK	2/b6	488.24	772.35	26
Gabra5	RGWAWDGK	2/b7	488.24	829.37	26
Gabra5	SIAHNMTTPNK	2/y6	607.3	691.34	31.721
Gabra5	SIAHNMTTPNK	2/y7	607.3	805.39	31.721
Gabra5	SIAHNMTTPNK	2/y8	607.3	942.45	31.721
Gabra5	SIAHNMTTPNK	3/y4	405.2	459.26	24
Gabra5	SIAHNMTTPNK	3/y5	405.2	560.3	24
Gabra5	SIAHNMTTPNK	3/y9(2)	405.2	507.25	24
Gabra5	STNAFTTGK	2/y5	463.73	553.3	25
Gabra5	STNAFTTGK	2/y6	463.73	624.34	25
Gabra5	STNAFTTGK	2/y7	463.73	738.38	25
Gabra5	SVVVAEDGSR	2/y6	509.76	634.28	27
Gabra5	SVVVAEDGSR	2/y7	509.76	733.35	27
Gabra5	SVVVAEDGSR	2/y8	509.76	832.42	27
Gabra5	TYNSISK	2/y4	406.71	434.26	23
Gabra5	TYNSISK	2/y5	406.71	548.3	23
Gabra5	TYNSISK	2/y6	406.71	711.37	23
Gabra6	FGSYAYPK	2/y5	466.73	641.33	26
Gabra6	FGSYAYPK	2/y6	466.73	728.36	26
Gabra6	FGSYAYPK	2/y7	466.73	785.38	26
Gabra6	ILDNLLEGYDNR	2/y6	717.86	753.32	37
Gabra6	ILDNLLEGYDNR	2/y7	717.86	866.4	37
Gabra6	ILDNLLEGYDNR	3/y6	478.91	753.32	28
Gabra6	ISSLTLPIVPSSEASK	3/b6	543.64	615.37	31
Gabra6	ISSLTLPIVPSSEASK	3/y6	543.64	608.29	31
Gabra6	ISSLTLPIVPSSEASK	3/y7	543.64	705.34	31
Gabra6	IWTPDTFFR	2/y5	591.8	685.33	31
Gabra6	IWTPDTFFR	2/y6	591.8	782.38	31
Gabra6	IWTPDTFFR	2/y7	591.8	883.43	31
Gabra6	LRPGFGGAVTEVK	3/b8	444.25	756.42	26
Gabra6	LRPGFGGAVTEVK	3/y4	444.25	476.27	26
Gabra6	LRPGFGGAVTEVK	3/y5	444.25	575.34	26
Gabra6	QAQTAATPPVAK	2/y6	591.83	612.37	31
Gabra6	QAQTAATPPVAK	2/y7	591.83	683.41	31
Gabra6	QAQTAATPPVAK	2/y8	591.83	754.45	31
Gabra6	STPVSPPLLLPATGGTSK	3/b9	574.99	892.51	33
Gabra6	STPVSPPLLLPATGGTSK	3/y7	574.99	621.32	33
Gabra6	STPVSPPLLLPATGGTSK	3/y8	574.99	718.37	33
Gabrb2	GDDNAVTGVTK	2/y5	538.76	505.3	28.706
Gabrb2	GDDNAVTGVTK	2/y6	538.76	604.37	29
Gabrb2	GDDNAVTGVTK	2/y7	538.76	675.4	29
Gabrb2	GDDNAVTGVTK	2/y8	538.76	789.45	29
Gabrb2	IELPQFSIVDYK	2/b7	726.39	815.43	37
Gabrb2	IELPQFSIVDYK	2/y10(2)	726.39	605.51	36.961
Gabrb2	IELPQFSIVDYK	2/y7	726.39	871.46	37
Gabrb2	IELPQFSIVDYK	2/y8	726.39	999.51	37
Gabrb2	ITIPDLTDVNAIDR	2/y7	778.42	802.41	39
Gabrb2	ITIPDLTDVNAIDR	2/y8	778.42	903.45	39
Gabrb2	ITIPDLTDVNAIDR	3/y4	519.28	474.27	29.964
Gabrb2	ITIPDLTDVNAIDR	3/y5	519.28	588.31	30
Gabrb2	KSFVHGVTVK	2/y6	551.32	640.38	29
Gabrb2	KSFVHGVTVK	2/y7	551.32	739.45	29
Gabrb2	KSFVHGVTVK	2/y9	551.32	973.55	29
Gabrb2	KVVFSTGSYPR	2/y6	620.84	680.34	32
Gabrb2	KVVFSTGSYPR	2/y7	620.84	767.37	32
Gabrb2	KVVFSTGSYPR	2/y8	620.84	914.44	32
Gabrb2	LHPDGTVLYGLR	3/y4	447.58	508.29	26
Gabrb2	LHPDGTVLYGLR	3/y5	447.58	621.37	26
Gabrb2	LHPDGTVLYGLR	3/y6	447.58	720.44	26
Gabrb2	LLKGYDIR	2/b6	489.29	690.38	27
Gabrb2	LLKGYDIR	2/y5	489.29	623.31	27
Gabrb2	LLKGYDIR	2/y6	489.29	751.41	27
Gabrb2	LSYNVIPLNLTLDNR	2/b5	872.98	577.3	43.411
Gabrb2	LSYNVIPLNLTLDNR	2/b6	872.98	690.38	43.411
Gabrb2	LSYNVIPLNLTLDNR	2/y7	872.98	845.45	43.411
Gabrb2	LSYNVIPLNLTLDNR	2/y8	872.98	958.53	43
Gabrb2	SFVHGVTVK	2/y5	487.28	503.32	26
Gabrb2	SFVHGVTVK	2/y6	487.28	640.38	26
Gabrb2	SFVHGVTVK	2/y7	487.28	739.45	26
Gabrb2	STMLAYDASSIQYR	3/y5	535.92	666.36	31
Gabrb2	STMLAYDASSIQYR	3/y6	535.92	753.39	31
Gabrb2	STMLAYDASSIQYR	2/y8	803.38	939.45	40
Gabrb2	VVFSTGSYPR	2/y5	556.79	579.29	29
Gabrb2	VVFSTGSYPR	2/y7	556.79	767.37	29
Gabrb2	VVFSTGSYPR	2/y8	556.79	914.44	29
Gabrb3	IELPQFSIVEHR	3/y4	489.94	540.29	28
Gabrb3	IELPQFSIVEHR	3/y6	489.94	740.4	28.497
Gabrb3	IELPQFSIVEHR	3/y7	489.94	887.47	28
Gabrb3	IELPQFSIVEHR	3/y9(2)	489.94	556.8	28
Gabrb3	IKIPDLTDVNAIDR	2/y8	791.94	903.45	39.846
Gabrb3	IKIPDLTDVNAIDR	3/b8	528.3	896.51	30
Gabrb3	IKIPDLTDVNAIDR	3/y5	528.3	588.31	30
Gabrb3	IKIPDLTDVNAIDR	3/y7	528.3	802.41	30
Gabrb3	IPDLTDVNAIDR	2/y6	671.35	687.38	35
Gabrb3	IPDLTDVNAIDR	2/y7	671.35	802.41	35
Gabrb3	IPDLTDVNAIDR	2/y8	671.35	903.45	35
Gabrb3	LAYSGIPLNLTLDNR	2/y7	830.46	845.45	42
Gabrb3	LAYSGIPLNLTLDNR	3/y4	553.97	517.27	31.699
Gabrb3	LAYSGIPLNLTLDNR	3/y5	553.97	618.32	32
Gabrb3	LAYSGIPLNLTLDNR	3/y6	553.97	731.4	31.699
Gabrb3	LAYSGIPLNLTLDNR	3/y7	553.97	845.45	32
Gabrb3	LHPDGTVLYGLR	3/y4	447.58	508.29	26
Gabrb3	LHPDGTVLYGLR	3/y5	447.58	621.37	26
Gabrb3	LHPDGTVLYGLR	3/y6	447.58	720.44	26
Gabrb3	NSAISFDNSGIQYR	3/y3	524.59	466.24	30.229
Gabrb3	NSAISFDNSGIQYR	3/y4	524.59	579.32	30
Gabrb3	NSAISFDNSGIQYR	3/y5	524.59	636.35	30
Gabrb3	NSAISFDNSGIQYR	3/y6	524.59	723.38	30
Gabrb3	NVVFATGAYPR	2/y7	597.82	735.38	31
Gabrb3	NVVFATGAYPR	2/y8	597.82	882.45	31
Gabrb3	NVVFATGAYPR	2/y9	597.82	981.52	31
Gabrb3	SFVHGVTVK	2/y5	487.28	503.32	26
Gabrb3	SFVHGVTVK	2/y6	487.28	640.38	26
Gabrb3	SFVHGVTVK	2/y7	487.28	739.45	26
Gabrb3	SKSEINR	2/b4	417.23	432.21	23
Gabrb3	SKSEINR	2/y4	417.23	531.29	23
Gabrb3	SKSEINR	2/y5	417.23	618.32	23
Gabrg1	AFLFSPSLLWSQTR	2/b8	826.94	863.47	41
Gabrg1	AFLFSPSLLWSQTR	2/y7	826.94	903.5	41
Gabrg1	AFLFSPSLLWSQTR	2/y8	826.94	990.54	41
Gabrg1	DC[PPa]TSFFC[PPa]C[PPa]FDDC[PPa]R	2/b7	923.34	946.34	46
Gabrg1	DC[PPa]TSFFC[PPa]C[PPa]FDDC[PPa]R	2/y5	923.34	726.29	45.627
Gabrg1	DC[PPa]TSFFC[PPa]C[PPa]FDDC[PPa]R	2/y6	923.34	900.33	45.627
Gabrg1	IHEGDITQILNSLLQGYDNK	3/b7	757.73	766.37	42
Gabrg1	IHEGDITQILNSLLQGYDNK	3/b8	757.73	894.43	42
Gabrg1	IHEGDITQILNSLLQGYDNK	3/y7	757.73	837.41	42
Gabrg1	IWIPDTFFR	2/y5	597.82	685.33	31
Gabrg1	IWIPDTFFR	2/y6	597.82	782.38	31
Gabrg1	IWIPDTFFR	2/y7	597.82	895.47	31
Gabrg1	KPSVEVADPK	2/b6	535.3	640.37	29
Gabrg1	KPSVEVADPK	2/b8	535.3	826.43	29
Gabrg1	KPSVEVADPK	2/y9	535.3	941.49	29
Gabrg1	KSDAHWITTPNR	3/b5	475.91	539.26	28
Gabrg1	KSDAHWITTPNR	3/y5	475.91	588.31	28
Gabrg1	KSDAHWITTPNR	3/y6	475.91	701.39	28
Gabrg1	LYQFAFVGLR	2/y6	607.34	662.4	32
Gabrg1	LYQFAFVGLR	2/y7	607.34	809.47	32
Gabrg1	LYQFAFVGLR	2/y8	607.34	937.53	32
Gabrg1	SDAHWITTPNR	2/b6	649.32	710.33	34
Gabrg1	SDAHWITTPNR	2/y6	649.32	701.39	34
Gabrg1	SDAHWITTPNR	2/y7	649.32	887.47	34
Gabrg1	TWVLAPK	2/y4	407.74	428.29	23
Gabrg1	TWVLAPK	2/y5	407.74	527.36	23
Gabrg1	TWVLAPK	2/y6	407.74	713.43	23
Gabrg2	ADAHWITTPNR	3/y10(2)	427.88	605.8	25
Gabrg2	ADAHWITTPNR	3/y4	427.88	487.26	25
Gabrg2	ADAHWITTPNR	3/y5	427.88	588.31	25
Gabrg2	KADAHWITTPNR	3/b5	470.58	523.26	28
Gabrg2	KADAHWITTPNR	3/y5	470.58	588.31	28
Gabrg2	KADAHWITTPNR	3/y6	470.58	701.39	28
Gabrg2	SDDDYEDYASNK	2/y7	711.27	826.36	36
Gabrg2	SDDDYEDYASNK	2/y8	711.27	989.42	36
Gabrg2	SDDDYEDYASNK	3/y6	474.52	697.32	28
Gabrg2	TWVLTPK	2/y4	422.75	458.3	24
Gabrg2	TWVLTPK	2/y5	422.75	557.37	24
Gabrg2	TWVLTPK	2/y6	422.75	743.45	24
Gabrp	DSEEVNITNIINSSISSFK	3/y8	699.68	869.44	39
Gabrp	DSEEVNITNIINSSISSFK	3/y9	699.68	982.52	39
Gabrp	FLRPNFGGDPVR	3/b5	458.91	628.36	27
Gabrp	FLRPNFGGDPVR	3/y5	458.91	543.29	27
Gabrp	FLRPNFGGDPVR	3/y6	458.91	600.31	27
Gabrp	IIDYFTIQNPSNVDR	2/b8	897.95	994.52	45
Gabrp	IIDYFTIQNPSNVDR	2/y7	897.95	801.38	44.51
Gabrp	IIDYFTIQNPSNVDR	2/y8	897.95	929.44	45
Gabrp	IIDYFTIQNPSNVDR	3/y5	598.97	590.29	33.949
Gabrp	IIDYFTIQNPSNVDR	3/y6	598.97	687.34	34
Gabrp	KSFLHEVTVGNR	3/y5	462.92	546.3	27
Gabrp	KSFLHEVTVGNR	3/y6	462.92	645.37	27
Gabrp	KSFLHEVTVGNR	3/y7	462.92	774.41	27
Gabrp	LFSNGTVLYALR	2/y6	677.38	734.46	35
Gabrp	LFSNGTVLYALR	2/y7	677.38	835.5	35
Gabrp	LFSNGTVLYALR	2/y8	677.38	892.53	35
Gabrp	LSLPGFENLTAGYNK	2/y8	812.42	880.45	41
Gabrp	LSLPGFENLTAGYNK	3/y4	541.95	481.24	31.098
Gabrp	LSLPGFENLTAGYNK	3/y5	541.95	552.28	31
Gabrp	LSLPGFENLTAGYNK	3/y6	541.95	653.33	31
Gabrp	SFLHEVTVGNR	3/y4	420.22	445.25	25
Gabrp	SFLHEVTVGNR	3/y5	420.22	546.3	25
Gabrp	SFLHEVTVGNR	3/y7	420.22	774.41	25
Gabrp	TSLPNTNC[PPa]FIK	2/y5	654.83	695.35	34
Gabrp	TSLPNTNC[PPa]FIK	2/y6	654.83	796.4	34
Gabrp	TSLPNTNC[PPa]FIK	2/y7	654.83	910.45	34
Grin1	AQYIEFSKPFK	2/y7	679.36	882.47	35
Grin1	AQYIEFSKPFK	2/y8	679.36	995.56	34.892
Grin1	AQYIEFSKPFK	3/y6	453.24	753.43	27
Grin1	AQYIEFSKPFK	3/y7	453.24	882.47	27
Grin1	C[PPa]DLVTTGELFFR	2/y6	736.37	768.4	37
Grin1	C[PPa]DLVTTGELFFR	2/y7	736.37	869.45	37
Grin1	C[PPa]DLVTTGELFFR	2/y8	736.37	970.5	37
Grin1	EAVNQANKR	2/y5	515.28	616.35	28
Grin1	EAVNQANKR	2/y6	515.28	730.4	28
Grin1	EAVNQANKR	2/y7	515.28	829.46	28
Grin1	EEFTVNGDPVK	2/y6	617.8	629.33	32
Grin1	EEFTVNGDPVK	2/y7	617.8	728.39	32
Grin1	EEFTVNGDPVK	2/y8	617.8	829.44	32.183
Grin1	EEFTVNGDPVK	2/y9	617.8	976.51	32
Grin1	HNYESAAEAIQAVR	3/b6	520.26	702.28	30
Grin1	HNYESAAEAIQAVR	3/y4	520.26	473.28	30.013
Grin1	HNYESAAEAIQAVR	3/y5	520.26	586.37	30
Grin1	HNYESAAEAIQAVR	3/y6	520.26	657.4	30
Grin1	IIWPGGETEKPR	2/y9	691.87	970.5	35
Grin1	IIWPGGETEKPR	3/y10(2)	461.59	578.79	27
Grin1	IIWPGGETEKPR	3/y9(2)	461.59	485.75	27
Grin1	IPVLGLTTR	2/y5	485.31	547.32	26
Grin1	IPVLGLTTR	2/y6	485.31	660.4	26
Grin1	IPVLGLTTR	2/y7	485.31	759.47	26
Grin1	ITGINDPR	2/y4	443.24	501.24	25
[truncated: 9,199 more rows]

## Sheet: Table S5
Table S5. Internal standard mixture containing 12 gamma-aminobutyric acid (GABA) and 8 glutamate receptors.
GABA receptors (total 12 receptors)	Amount in tissue sample (fmol/ug total protein)	Glutamate receptors (total 8 receptors)	Amount in tissue sample (fmol/ug total protein)
Gabra1	9.97	Gria1	4.77
Gabra2	12.88	Gria2	5.1
Gabra3	12.7	Gria3	6.76
Gabra4	9.16	Gria4	9.77
Gabra5	13.63	Grik1	7.79
Gabra6	11.89	Grik4	4.79
Gabrb2	4.65	Grin1	1.36
Gabrb3	9.41	Grm8	3.64
Gabrg1	9.7
Gabrg2	4.67
Gabrp	11.11
Gabrr2	13.13

## Sheet: Table S6
Table S6. Absolute quantitation of mouse neurotransmitter receptors in six brain regions using SRM.
				Peak area ratio (Light/Heavy)								Protein Expression (fmol/ug total protein)
Targeted peptide ion	Q1/Q3 transition (Light)	Q1/Q3 transition (Heavy)	Retention time	CBL	FCTX	HP	MB	OB	STR		Targeted peptide ion	CBL	FCTX	HP	MB	OB	STR
Gabra1 AEVVYEWTR 2/y5	576.79/754.35	581.79/764.36	48.9	0.700253	1.08117	0.639615	0.719015	1.08384	0.515423		Gabra1 AEVVYEWTR 2/y5	6.98071	10.778	6.37622	7.16774	10.8046	5.13817
Gabra1 AEVVYEWTR 2/y6	576.79/853.42	581.79/863.43	48.9	0.835633	1.06496	0.591607	0.633805	0.920247	0.464558		Gabra1 AEVVYEWTR 2/y6	8.33029	10.6164	5.89763	6.3183	9.17379	4.63111
Gabra1 AEVVYEWTR 2/y7	576.79/952.49	581.79/962.5	48.9	0.835025	1.04926	0.771412	0.781054	1.19459	0.65435		Gabra1 AEVVYEWTR 2/y7	8.32423	10.4599	7.69008	7.7862	11.9086	6.52311
Gabra1 FGSYAYTR 2/y6	482.73/760.36	487.73/770.37	36.8	0.716505	1.09339	0.571405	0.800461	0.926726	0.461771		Gabra1 FGSYAYTR 2/y6	7.14272	10.8998	5.69625	7.97967	9.23838	4.60332
Gabra1 FGSYAYTR 2/y4	482.73/510.27	487.73/520.28	36.8	0.795156	1.10572	0.574347	0.6048	0.973757	0.474365		Gabra1 FGSYAYTR 2/y4	7.92678	11.0227	5.72557	6.02916	9.70723	4.72887
Gabra1 FGSYAYTR 2/y7	482.73/817.38	487.73/827.39	36.8	0.688738	0.955354	0.622196	0.750145	0.933407	0.46157		Gabra1 FGSYAYTR 2/y7	6.86592	9.52377	6.20257	7.47807	9.30498	4.60132
Gabra1 GDPGLATIAK 2/y8	471.77/770.48	475.77/778.49	38.6	0.874451	1.19322	0.670055	0.79569	1.25196	0.631894		Gabra1 GDPGLATIAK 2/y8	8.71726	11.895	6.67967	7.9321	12.4806	6.29925
Gabra1 GDPGLATIAK 2/y7	471.77/673.42	475.77/681.44	38.6	0.869126	1.40274	0.704753	0.902243	1.21888	0.577133		Gabra1 GDPGLATIAK 2/y7	8.66417	13.9837	7.02556	8.99431	12.1509	5.75334
Gabra1 GDPGLATIAK 2/y5	471.77/503.32	475.77/511.33	38.6	0.963423	1.35588	0.725153	0.727143	1.19254	0.530607		Gabra1 GDPGLATIAK 2/y5	9.60421	13.5165	7.22893	7.24877	11.8882	5.28954
Gabra1 NNTYAPTATSYTPNLAR 3/y6	618.97/671.38	622.31/681.39	47.7	0.712234	1.10861	0.759316	1.00543	1.03713	0.427585		Gabra1 NNTYAPTATSYTPNLAR 3/y6	7.10015	11.0516	7.5695	10.023	10.3389	4.26252
Gabra1 NNTYAPTATSYTPNLAR 3/y7	618.97/834.45	622.31/844.46	47.7	0.615314	0.871283	0.622773	0.735027	0.949209	0.410868		Gabra1 NNTYAPTATSYTPNLAR 3/y7	6.13397	8.68568	6.20832	7.32736	9.46251	4.09587
			Average	0.782351	1.11651	0.65933	0.768619	1.06203	0.510011		Average	7.79913	11.1303	6.57275	7.66224	10.5872	5.08422
				Peak area ratio (Light/Heavy)								Protein Expression (fmol/ug total protein)
Targeted peptide ion	Q1/Q3 transition (Light)	Q1/Q3 transition (Heavy)	Retention time	CBL	FCTX	HP	MB	OB	STR		Targeted peptide ion	CBL	FCTX	HP	MB	OB	STR
Gabra2 DPVLSTISK 2/y6	480.27/648.39	484.28/656.41	43.1	0.0504664	0.090156	0.109284	0.0421756	0.10761	0.0770783		Gabra2 DPVLSTISK 2/y6	0.650021	1.16123	1.40761	0.543232	1.38605	0.992789
Gabra2 DPVLSTISK 2/y5	480.27/535.31	484.28/543.32	43.1	0.0353326	0.0795342	0.093419	0.0383751	0.122962	0.0876231		Gabra2 DPVLSTISK 2/y5	0.455093	1.02442	1.20326	0.494282	1.58379	1.12861
Gabra2 LNQYDLLGQSIGK 3/y6	483.6/589.33	486.27/597.34	62.9	0.0347237	0.0705464	0.0927816	0.0433456	0.101556	0.046538		Gabra2 LNQYDLLGQSIGK 3/y6	0.44725	0.908656	1.19505	0.558303	1.30807	0.599422
Gabra2 LNQYDLLGQSIGK 2/y9	724.89/930.53	728.9/938.54	62.9	0.0516485	0.0842065	0.109662	0.0320212	0.123732	0.0825736		Gabra2 LNQYDLLGQSIGK 2/y9	0.665247	1.0846	1.41247	0.412442	1.59371	1.06357
Gabra2 LNREPVLGVSP 2/b9	590.84/978.57	595.84/988.58	49.2	0.0472884	0.0711779	0.138874	0.0641085	0.144095	0.119058		Gabra2 LNREPVLGVSP 2/b9	0.609087	0.91679	1.78873	0.825735	1.85598	1.5335
Gabra2 NNITIFTR 2/y5	489.77/637.37	494.78/647.38	50	0.0414818	0.0517916	0.0636066	0.0224894	0.0606972	0.0382922		Gabra2 NNITIFTR 2/y5	0.534297	0.66709	0.81927	0.289669	0.781796	0.493214
Gabra2 NNITIFTR 2/y6	489.77/750.45	494.78/760.46	50	0.0953783	0.0876565	0.138024	0.0673685	0.0972725	0.0931396		Gabra2 NNITIFTR 2/y6	1.2285	1.12904	1.77779	0.867724	1.2529	1.19966
			Average	0.0509028	0.0764384	0.106522	0.0442691	0.108275	0.0777575		Average	0.655642	0.984547	1.37203	0.570198	1.39461	1.00154
				Peak area ratio (Light/Heavy)								Protein Expression (fmol/ug total protein)
Targeted peptide ion	Q1/Q3 transition (Light)	Q1/Q3 transition (Heavy)	Retention time	CBL	FCTX	HP	MB	OB	STR		Targeted peptide ion	CBL	FCTX	HP	MB	OB	STR
Gabra3 DTEFSTISK 2/y6	514.25/682.38	518.26/690.39	37.4	0.00508081	0.0985151	0.0430529	0.0572513	0.185914	0.048547		Gabra3 DTEFSTISK.2/y6	0.0645151	1.25092	0.546676	0.726965	2.3607	0.616439
Gabra3 DTEFSTISK 2/y7	514.25/811.42	518.26/819.43	37.4	0.0134207	0.104124	0.0421958	0.0684332	0.161235	0.0359806		Gabra3 DTEFSTISK.2/y7	0.170413	1.32214	0.535793	0.86895	2.04733	0.456874
Gabra3 DTEFSTISK 2/y5	514.25/535.31	518.26/543.32	37.4	0.0162256	0.141779	0.0505988	0.0609003	0.149768	0.0377165		Gabra3 DTEFSTISK.2/y5	0.206029	1.80028	0.642492	0.7733	1.90172	0.478916
Gabra3 FGSYAYTK 2/y7	468.73/789.38	472.73/797.39	36.7	ND	0.15005	0.0721569	0.0895855	0.185813	0.0714257		Gabra3 FGSYAYTK.2/y7	ND	1.9053	0.916233	1.13754	2.35942	0.906948
Gabra3 FGSYAYTK 2/y6	468.73/732.36	472.73/740.37	36.7	ND	0.168995	0.0499857	0.0850941	0.167538	0.0489126		Gabra3 FGSYAYTK.2/y6	ND	2.14587	0.634707	1.08051	2.12736	0.621082
Gabra3 FGSYAYTK 2/y4	468.73/482.26	472.73/490.28	36.7	ND	0.128862	0.028953	0.0814023	0.142692	0.0475649		Gabra3 FGSYAYTK.2/y4	ND	1.63626	0.367639	1.03363	1.81188	0.603969
Gabra3 ILPLNNLLASK 2/y9	598.37/969.57	602.38/977.59	66.5	0.0340775	0.169364	0.0789927	0.0601072	0.1721	0.0502696		Gabra3 ILPLNNLLASK.2/y9	0.432709	2.15055	1.00303	0.763228	2.18528	0.638312
Gabra3 ILPLNNLLASK 2/y8	598.37/872.52	602.38/880.53	66.5	0.0637072	0.137758	0.0990318	0.0882046	0.222244	0.0533581		Gabra3 ILPLNNLLASK.2/y8	0.80894	1.74922	1.25748	1.12	2.82201	0.67753
Gabra3 SVEVAQDGSR 2/y8	524.26/861.41	529.26/871.41	23.7	0.008652	0.0757852	0.033387	0.050324	0.129029	0.0301172		Gabra3 SVEVAQDGSR.2/y8	0.109861	0.962305	0.42394	0.639004	1.63838	0.382421
Gabra3 SVEVAQDGSR 2/y7	524.26/732.36	529.26/742.37	23.7	0.0337122	0.174653	0.0634507	0.0799033	0.167443	0.0387862		Gabra3 SVEVAQDGSR.2/y7	0.42807	2.21771	0.805684	1.01459	2.12615	0.492498
Gabra3 VQDSPAETKTY 2/y7	619.8/809.4	623.81/817.42	29.7	ND	0.0900555	0.0328486	0.0552463	0.128587	0.024076		Gabra3 VQDSPAETKTY.2/y7	ND	1.14351	0.417104	0.701506	1.63277	0.305712
Gabra3 VQDSPAETKTY 2/y8	619.8/896.44	623.81/904.45	29.7	0.00274581	0.107021	0.069256	0.0693548	0.176007	0.0443515		Gabra3 VQDSPAETKTY.2/y8	0.0348657	1.35892	0.879397	0.880652	2.2349	0.563166
Gabra3 VQDSPAETKTY 2/y5	619.8/641.31	623.81/649.33	29.7	0.0717276	0.171543	ND	0.0668845	0.185573	0.0592671		Gabra3 VQDSPAETKTY.2/y5	0.910781	2.17821	ND	0.849285	2.35637	0.752561
			Average	0.0277055	0.132193	0.0553258	0.070207	0.167226	0.0454133		Average	0.351798	1.67855	0.702515	0.891474	2.12341	0.576648
				Peak area ratio (Light/Heavy)								Protein Expression (fmol/ug total protein)
Targeted peptide ion	Q1/Q3 transition (Light)	Q1/Q3 transition (Heavy)	Retention time	CBL	FCTX	HP	MB	OB	STR		Targeted peptide ion	CBL	FCTX	HP	MB	OB	STR
Gabra4 AHLASSPNPFSR 3/y4	428.55/506.27	431.89/516.28	41.7	ND	0.110671	0.0936128	ND	ND	0.113921		Gabra4 AHLASSPNPFSR 3/y4	ND	1.01327	0.857091	ND	ND	1.04303
Gabra4 AHLASSPNPFSR 2/y9	642.33/962.47	647.33/972.48	41.7	ND	0.101803	0.0520452	ND	ND	0.141145		Gabra4 AHLASSPNPFSR 2/y9	ND	0.932078	0.47651	ND	ND	1.29228
Gabra4 AHLASSPNPFSR 2/y8	642.33/891.43	647.33/901.44	41.7	0.0234518	0.16847	0.111448	ND	ND	ND		Gabra4 AHLASSPNPFSR 2/y8	0.214718	1.54246	1.02038	ND	ND	ND
Gabra4 ILDSLLDGYDNR 2/y7	697.35/852.38	702.36/862.39	63.6	0.00384895	0.0783385	0.049424	0.00949998	0.0393155	0.0939952		Gabra4 ILDSLLDGYDNR 2/y7	0.0352398	0.717243	0.452511	0.0869789	0.359961	0.860592
Gabra4 ILDSLLDGYDNR 2/y6	697.35/739.3	702.36/749.31	63.6	0.0128374	0.0812711	0.0868826	0.00916237	0.0466343	0.0725235		Gabra4 ILDSLLDGYDNR 2/y6	0.117535	0.744094	0.795471	0.0838878	0.42697	0.664003
Gabra4 ILDSLLDGYDNR 2/y8	697.35/965.47	702.36/975.48	63.6	ND	0.0591919	0.157155	ND	ND	0.255231		Gabra4 ILDSLLDGYDNR 2/y8	ND	0.541943	1.43887	ND	ND	2.33682
Gabra4 YDGPIEILR 2/y7	538.29/797.49	543.3/807.5	60.1	0.025906	0.101749	0.0538139	0.00900917	0.0423602	0.0996642		Gabra4 YDGPIEILR 2/y7	0.237187	0.931586	0.492704	0.0824852	0.387837	0.912495
Gabra4 YDGPIEILR 2/y8	538.29/912.51	543.3/922.52	60.1	0.0454904	0.0699958	0.0795397	0.0168393	0.0449086	0.0883983		Gabra4 YDGPIEILR 2/y8	0.416496	0.640861	0.728242	0.154175	0.411169	0.809348
Gabra4 YDGPIEILR 2/y6	538.29/740.47	543.3/750.47	60.1	0.0394839	0.0765301	0.0678958	0.0411317	0.0703907	0.112257		Gabra4 YDGPIEILR 2/y6	0.361502	0.700686	0.621634	0.376589	0.644476	1.02779
Gabra4 TNALVHSESDVK 2/y7	650.33/801.37	654.34/809.39	31.6	ND	0.141549	0.125711	0.0394715	ND	0.161641		Gabra4 TNALVHSESDVK 2/y7	ND	1.29598	1.15097	0.361389	ND	1.47994
Gabra4 TNALVHSESDVK 2/y8	650.33/900.44	654.34/908.46	31.6	ND	0.108512	0.1094	0.0757051	ND	0.154237		Gabra4 TNALVHSESDVK 2/y8	ND	0.993499	1.00163	0.693133	ND	1.41215
Gabra4 TNALVHSESDVK 2/y6	650.33/664.31	654.34/672.33	31.6	ND	0.140876	0.102505	0.0550516	ND	0.113331		Gabra4 TNALVHSESDVK 2/y6	ND	1.28981	0.9385	0.504035	ND	1.03763
			Average	0.0251697	0.103246	0.090786	0.0319838	0.0487219	0.12785		Average	0.230446	0.945293	0.83121	0.292834	0.446083	1.17055
				Peak area ratio (Light/Heavy)								Protein Expression (fmol/ug total protein)
Targeted peptide ion	Q1/Q3 transition (Light)	Q1/Q3 transition (Heavy)	Retention time	CBL	FCTX	HP	MB	OB	STR		Targeted peptide ion	CBL	FCTX	HP	MB	OB	STR
Gabra5 EQPPAGTANAPTVSIK 3/y6	527.61/644.4	530.29/652.41	41.1	ND	0.0517385	0.125003	0.0588571	0.1713	ND		Gabra5 EQPPAGTANAPTVSIK 3/y6	ND	0.70535	1.70416	0.802399	2.33534	ND
Gabra5 EQPPAGTANAPTVSIK 3/y8	527.61/829.48	530.29/837.49	41.1	ND	0.051612	0.159687	0.0128111	0.13664	ND		Gabra5 EQPPAGTANAPTVSIK 3/y8	ND	0.703626	2.17701	0.174654	1.86282	ND
Gabra5 EQPPAGTANAPTVSIK 3/y7	527.61/715.43	530.29/723.45	41.1	ND	0.0675696	0.0950936	ND	0.172105	ND		Gabra5 EQPPAGTANAPTVSIK 3/y7	ND	0.921175	1.29641	ND	2.34631	ND
Gabra5 ILDGLLDGYDNR 2/y7	682.35/852.38	687.35/862.39	63.8	0.0159707	0.0250216	0.0936483	0.0217659	0.0914173	0.0215981		Gabra5 ILDGLLDGYDNR 2/y7	0.217728	0.34112	1.27671	0.296735	1.24629	0.294447
Gabra5 ILDGLLDGYDNR 2/y6	682.35/739.3	687.35/749.31	63.8	0.0281541	0.0427552	0.13211	0.03744	0.0962374	0.0247429		Gabra5 ILDGLLDGYDNR 2/y6	0.383824	0.582881	1.80105	0.510419	1.312	0.33732
Gabra5 ILDGLLDGYDNR 2/y8	682.35/965.47	687.35/975.48	63.8	0.011058	0.0326101	0.0955005	0.00898303	0.0597424	0.0287298		Gabra5 ILDGLLDGYDNR 2/y8	0.150754	0.444573	1.30196	0.122466	0.814467	0.391673
Gabra5 STNAFTTGK 2/y7	463.73/738.38	467.74/746.39	28.1	ND	0.0319287	0.107033	0.019301	0.116062	0.0253386		Gabra5 STNAFTTGK 2/y7	ND	0.435284	1.45918	0.26313	1.58227	0.345441
Gabra5 STNAFTTGK 2/y6	463.73/624.34	467.74/632.35	28.1	ND	0.0447377	0.117037	0.0227468	0.103531	0.13039		Gabra5 STNAFTTGK 2/y6	ND	0.609909	1.59557	0.310107	1.41144	1.77761
Gabra5 STNAFTTGK 2/y5	463.73/553.3	467.74/561.31	28.1	ND	0.0144967	0.121844	0.00917507	0.107908	0.0938614		Gabra5 STNAFTTGK 2/y5	ND	0.197633	1.6611	0.125084	1.47111	1.27961
Gabra5 TYNSISK 2/y5	406.71/548.3	410.72/556.32	25.2	ND	0.0325826	0.116728	0.011166	0.104054	0.00809028		Gabra5 TYNSISK 2/y5	ND	0.444199	1.59135	0.152226	1.41856	0.110295
Gabra5 TYNSISK 2/y6	406.71/711.37	410.72/719.38	25.2	ND	0.0730268	0.160157	0.106523	0.186318	0.0259695		Gabra5 TYNSISK 2/y6	ND	0.995574	2.18342	1.45223	2.54007	0.354042
Gabra5 TYNSISK 2/y4	406.71/434.26	410.72/442.28	25.2	ND	0.090434	0.0975838	0.137294	ND	ND		Gabra5 TYNSISK 2/y4	ND	1.23289	1.33036	1.87173	ND	ND
			Average	0.0183943	0.0465428	0.118452	0.0405512	0.122301	0.0448401		Average	0.250769	0.634518	1.61486	0.552834	1.66733	0.611305
				Peak area ratio (Light/Heavy)								Protein Expression (fmol/ug total protein)
Targeted peptide ion	Q1/Q3 transition (Light)	Q1/Q3 transition (Heavy)	Retention time	CBL	FCTX	HP	MB	OB	STR		Targeted peptide ion	CBL	FCTX	HP	MB	OB	STR
Gabra6 ILDNLLEGYDNR 2/y6	717.86/753.32	722.87/763.32	63	0.415635	0.0107372	0.0356012	0.0242299	0.0242759	0.0130789		Gabra6 ILDNLLEGYDNR 2/y6	4.94259	0.127684	0.423358	0.288134	0.288681	0.15553
Gabra6 ILDNLLEGYDNR 2/y7	717.86/866.4	722.87/876.41	63	0.442654	0.0570638	0.013764	0.0211467	0.0189451	0.0246344		Gabra6 ILDNLLEGYDNR 2/y7	5.26389	0.678583	0.163677	0.251469	0.225289	0.292944
Gabra6 ILDNLLEGYDNR 3/y6	478.91/753.32	482.25/763.32	63	0.397888	0.0108329	0.011867	0.0586754	0.0488511	0.0172672		Gabra6 ILDNLLEGYDNR 3/y6	4.73155	0.128821	0.141119	0.697748	0.580921	0.205336
Gabra6 ISSLTLPIVPSSEASK 3/y6	543.64/608.29	546.31/616.3	62.7	0.393153	ND	ND	ND	ND	ND		Gabra6 ISSLTLPIVPSSEASK 3/y6	4.67524	ND	ND	ND	ND	ND
Gabra6 ISSLTLPIVPSSEASK 3/y7	543.64/705.34	546.31/713.36	62.7	0.450858	ND	ND	ND	ND	ND		Gabra6 ISSLTLPIVPSSEASK 3/y7	5.36145	ND	ND	ND	ND	ND
Gabra6 IWTPDTFFR 2/y6	591.8/782.38	596.8/792.39	66.6	0.385039	0.048598	0.0359377	0.00881943	0.0140077	0.0344479		Gabra6 IWTPDTFFR 2/y6	4.57875	0.577911	0.42736	0.104878	0.166575	0.409643
Gabra6 IWTPDTFFR 2/y7	591.8/883.43	596.8/893.44	66.6	0.378345	0.00627105	0.0126861	0.00553744	0.00557564	0.0102142		Gabra6 IWTPDTFFR 2/y7	4.49916	0.0745732	0.150858	0.0658493	0.0663037	0.121464
Gabra6 SRILFPVAF 2/b5	525.31/617.38	530.31/627.39	67.4	0.474904	ND	0.0164032	0.0165518	0.0158766	0.0202377		Gabra6 SRILFPVAF 2/b5	5.6474	ND	0.195061	0.196829	0.1888	0.24066
Gabra6 SRILFPVAF 2/b7	525.31/813.5	530.31/823.51	67.4	0.447979	0.00492355	ND	ND	ND	ND		Gabra6 SRILFPVAF 2/b7	5.32721	0.0585492	ND	ND	ND	ND
Gabra6 SRILFPVAF 2/b8	525.31/884.54	530.31/894.54	67.4	0.483822	ND	0.0142238	ND	0.00725996	0.00418773		Gabra6 SRILFPVAF 2/b8	5.75346	ND	0.169145	ND	0.086333	0.0497991
Gabra6 STPVSPPLLLPATGGTSK 3/b9	574.99/892.51	577.66/892.51	59.3	0.413335	ND	ND	ND	ND	ND		Gabra6 STPVSPPLLLPATGGTSK 3/b9	4.91525	ND	ND	ND	ND	ND
Gabra6 STPVSPPLLLPATGGTSK 3/y7	574.99/621.32	577.66/629.33	59.3	0.418128	ND	ND	ND	ND	ND		Gabra6 STPVSPPLLLPATGGTSK 3/y7	4.97224	ND	ND	ND	ND	ND
Gabra6 STPVSPPLLLPATGGTSK 3/y8	574.99/718.37	577.66/726.39	59.3	0.429141	ND	ND	ND	ND	ND		Gabra6 STPVSPPLLLPATGGTSK 3/y8	5.1032	ND	ND	ND	ND	ND
			Average	5.05934	0.274354	0.238654	0.267484	0.228986	0.210768		Average	5.05934	0.274354	0.238654	0.267484	0.228986	0.210768
				Peak area ratio (Light/Heavy)								Protein Expression (fmol/ug total protein)
Targeted peptide ion	Q1/Q3 transition (Light)	Q1/Q3 transition (Heavy)	Retention time	CBL	FCTX	HP	MB	OB	STR		Targeted peptide ion	CBL	FCTX	HP	MB	OB	STR
Gabrb2 GDDNAVTGVTK 2/y6	538.76/604.37	542.77/612.38	27.5	2.14456	1.83997	1.02509	1.28117	2.05638	0.810428		Gabrb2 GDDNAVTGVTK 2/y6	9.96948	8.55356	4.76539	5.95582	9.55956	3.76747
Gabrb2 GDDNAVTGVTK 2/y7	538.76/675.4	542.77/683.42	27.5	2.62513	1.79445	0.67249	1.11544	1.69813	0.854384		Gabrb2 GDDNAVTGVTK 2/y7	12.2035	8.34191	3.12623	5.18538	7.89417	3.97181
Gabrb2 GDDNAVTGVTK 2/y8	538.76/789.45	542.77/797.46	27.5	2.54597	1.6768	1.64953	1.11425	2.11984	0.997711		Gabrb2 GDDNAVTGVTK 2/y8	11.8355	7.79498	7.66822	5.17985	9.8546	4.6381
Gabrb2 ITIPDLTDVNAIDR 2/y7	778.42/802.41	783.42/812.41	66.6	1.7503	1.64296	0.813678	1.27427	1.94766	0.921513		Gabrb2 ITIPDLTDVNAIDR 2/y7	8.13667	7.63769	3.78258	5.92373	9.05416	4.28387
Gabrb2 ITIPDLTDVNAIDR 2/y8	778.42/903.45	783.42/913.46	66.6	2.03242	1.11182	1.04145	1.26566	1.57423	0.829354		Gabrb2 ITIPDLTDVNAIDR 2/y8	9.44818	5.16856	4.84144	5.88374	7.31816	3.85545
Gabrb2 ITIPDLTDVNAIDR 3/y5	519.28/588.31	522.62/598.32	66.6	2.2046	1.86749	0.776217	1.4365	2.53678	0.886504		Gabrb2 ITIPDLTDVNAIDR 3/y5	10.2486	8.68148	3.60843	6.67791	11.7928	4.12112
Gabrb2 STMLAYDASSIQYR 2/y8	803.38/939.45	808.39/949.46	57.6	2.41659	1.88573	0.823379	1.19886	2.6673	0.793098		Gabrb2 STMLAYDASSIQYR 2/y8	11.2341	8.76624	3.82767	5.57319	12.3996	3.68691
Gabrb2 STMLAYDASSIQYR 3/y5	535.92/666.36	539.26/676.37	57.6	1.61558	2.03541	0.656534	0.895584	2.1563	0.658045		Gabrb2 STMLAYDASSIQYR 3/y5	7.51042	9.46209	3.05205	4.16333	10.0241	3.05908
Gabrb2 STMLAYDASSIQYR 3/y6	535.92/753.39	539.26/763.4	57.6	1.31147	2.33717	0.833165	0.350532	1.29492	0.713844		Gabrb2 STMLAYDASSIQYR 3/y6	6.09667	10.8649	3.87316	1.62953	6.01975	3.31847
Gabrb2 VVFSTGSYPR 2/y5	556.79/579.29	561.79/589.3	45.7	2.24088	2.25174	0.743944	1.30911	2.3397	0.827745		Gabrb2 VVFSTGSYPR 2/y5	10.4173	10.4677	3.4584	6.08569	10.8767	3.84797
Gabrb2 VVFSTGSYPR 2/y7	556.79/767.37	561.79/777.38	45.7	1.9339	1.69479	0.68858	1.07399	1.88654	0.688058		Gabrb2 VVFSTGSYPR 2/y7	8.99021	7.87864	3.20103	4.9927	8.77001	3.1986
Gabrb2 VVFSTGSYPR 2/y8	556.79/914.44	561.79/924.44	45.7	2.06091	1.64683	0.801781	1.10205	2.05885	0.840421		Gabrb2 VVFSTGSYPR 2/y8	9.58061	7.65566	3.72727	5.12312	9.57104	3.9069
			Average	2.07352	1.81543	0.877153	1.11812	2.02805	0.818425		Average	9.63927	8.43945	4.07766	5.19783	9.42788	3.80464
				Peak area ratio (Light/Heavy)								Protein Expression (fmol/ug total protein)
Targeted peptide ion	Q1/Q3 transition (Light)	Q1/Q3 transition (Heavy)	Retention time	CBL	FCTX	HP	MB	OB	STR		Targeted peptide ion	CBL	FCTX	HP	MB	OB	STR
Gabrb3 ATGAYPRLSL 2/y5	524.79/585.37	529.8/595.38	57.6	0.326009	0.58456	0.592916	0.17703	0.632286	0.332368		Gabrb3 ATGAYPRLSL 2/y5	3.06687	5.49915	5.57776	1.66538	5.94812	3.1267
Gabrb3 ATGAYPRLSL 2/y6	524.79/748.44	529.8/758.44	57.6	0.250856	0.376488	0.423089	0.196614	0.548989	0.2605		Gabrb3 ATGAYPRLSL 2/y6	2.35988	3.54174	3.98013	1.84961	5.16451	2.45061
Gabrb3 ATGAYPRLSL 2/y8	524.79/876.49	529.8/886.5	57.6	0.22807	0.430765	0.454627	0.168589	0.579811	0.283675		Gabrb3 ATGAYPRLSL 2/y8	2.14553	4.05235	4.27682	1.58597	5.45447	2.66862
Gabrb3 IELPQFSIVEHR 3/y4	489.94/540.29	493.27/550.3	65.9	0.41009	0.583284	0.570655	0.276879	0.751574	0.336955		Gabrb3 IELPQFSIVEHR 3/y4	3.85785	5.48714	5.36834	2.60469	7.0703	3.16984
Gabrb3 IELPQFSIVEHR 3/y6	489.94/740.4	493.27/750.41	65.9	0.339297	0.56267	0.56502	0.285162	0.62424	0.369319		Gabrb3 IELPQFSIVEHR 3/y6	3.19187	5.29322	5.31533	2.68261	5.87242	3.4743
Gabrb3 IELPQFSIVEHR 3/y7	489.94/887.47	493.27/897.48	65.9	0.20483	0.39487	0.276821	0.166597	0.476738	0.216868		Gabrb3 IELPQFSIVEHR 3/y7	1.9269	3.71467	2.60414	1.56723	4.48483	2.04015
Gabrb3 NSAISFDNSGIQYR 3/y4	524.59/579.32	527.92/589.33	54.3	0.156347	0.445267	0.422967	ND	0.410991	0.231993		Gabrb3 NSAISFDNSGIQYR 3/y4	1.47081	4.18877	3.97899	ND	3.86633	2.18244
Gabrb3 NSAISFDNSGIQYR 3/y5	524.59/636.35	527.92/646.35	54.3	0.247494	0.545035	0.410423	0.166883	0.54099	0.243776		Gabrb3 NSAISFDNSGIQYR 3/y5	2.32826	5.12732	3.86099	1.56992	5.08927	2.29328
Gabrb3 NSAISFDNSGIQYR 3/y6	524.59/723.38	527.92/733.39	54.3	0.261346	0.471887	0.33334	0.439885	0.601003	0.299219		Gabrb3 NSAISFDNSGIQYR 3/y6	2.45856	4.43919	3.13584	4.13814	5.65383	2.81485
Gabrb3 NVVFATGAYPR 2/y7	597.82/735.38	602.82/745.39	50.3	0.223376	0.461824	0.461663	0.177435	0.623923	0.259307		Gabrb3 NVVFATGAYPR 2/y7	2.10137	4.34453	4.34302	1.66919	5.86945	2.43938
Gabrb3 NVVFATGAYPR 2/y8	597.82/882.45	602.82/892.46	50.3	0.218538	0.453318	0.420522	0.180291	0.523438	0.262291		Gabrb3 NVVFATGAYPR 2/y8	2.05586	4.26451	3.95599	1.69606	4.92415	2.46746
Gabrb3 NVVFATGAYPR 2/y9	597.82/981.52	602.82/991.52	50.3	0.208344	0.450876	0.466915	0.162196	0.567355	0.257664		Gabrb3 NVVFATGAYPR 2/y9	1.95996	4.24154	4.39242	1.52583	5.33729	2.42393
Gabrb3 SRIVFPF 2/b4	433.25/456.29	438.25/466.3	67.4	0.0223595	0.470241	0.319923	0.224916	0.584364	0.275046		Gabrb3 SRIVFPF 2/b4	0.210343	4.42371	3.00962	2.11586	5.49731	2.58744
Gabrb3 SRIVFPF 2/b5	433.25/603.36	438.25/613.37	67.4	0.186581	0.430746	0.412514	0.178126	0.575523	0.282216		Gabrb3 SRIVFPF 2/b5	1.75523	4.05217	3.88066	1.67569	5.41413	2.6549
			Average	0.234538	0.475845	0.437957	0.215431	0.574373	0.279371		Average	2.20638	4.47643	4.12	2.02663	5.40332	2.62814
				Peak area ratio (Light/Heavy)								Protein Expression (fmol/ug total protein)
Targeted peptide ion	Q1/Q3 transition (Light)	Q1/Q3 transition (Heavy)	Retention time	CBL	FCTX	HP	MB	OB	STR		Targeted peptide ion	CBL	FCTX	HP	MB	OB	STR
Gabrg1 LYQFAFVGLR 2/y7	607.34/809.47	612.34/819.48	67.2	0.0706779	0.0192225	0.0570254	0.0421248	0.0667826	0.0720589		Gabrg1 LYQFAFVGLR 2/y7	0.685502	0.186438	0.553087	0.408566	0.647721	0.698895
Gabrg1 LYQFAFVGLR 2/y8	607.34/937.53	612.34/947.53	67.2	0.0813792	0.0659319	0.0586121	0.0498431	0.075346	0.045956		Gabrg1 LYQFAFVGLR 2/y8	0.789293	0.639471	0.568476	0.483425	0.730777	0.445725
Gabrg1 TWVLAPK 2/y4	407.74/428.29	411.75/436.3	49.5	0.018996	0.0349372	0.0217592	0.0370511	0.035123	0.0463118		Gabrg1 TWVLAPK 2/y4	0.184241	0.338854	0.211041	0.359357	0.340656	0.449176
Gabrg1 TWVLAPK 2/y5	407.74/527.36	411.75/535.37	49.5	0.0172367	0.0119115	0.00877555	0.0317023	0.0202603	0.0288519		Gabrg1 TWVLAPK 2/y5	0.167177	0.115529	0.0851136	0.307479	0.196504	0.279833
Gabrg1 TWVLAPK 2/y6	407.74/713.43	411.75/721.45	49.5	0.0438882	ND	0.00325631	0.0474617	0.00823725	0.0404631		Gabrg1 TWVLAPK 2/y6	0.425669	ND	0.0315828	0.460328	0.0798926	0.392449
			Average	0.0464356	0.0330008	0.0298857	0.0416366	0.0411498	0.0467283		Average	0.450376	0.320073	0.28986	0.403831	0.39911	0.453216
				Peak area ratio (Light/Heavy)								Protein Expression (fmol/ug total protein)
Targeted peptide ion	Q1/Q3 transition (Light)	Q1/Q3 transition (Heavy)	Retention time	CBL	FCTX	HP	MB	OB	STR		Targeted peptide ion	CBL	FCTX	HP	MB	OB	STR
Gabrg2 TWVLTPK 2/y4	422.75/458.3	426.76/466.31	47.7	0.396101	0.840913	0.592806	0.485547	0.909569	0.310345		Gabrg2 TWVLTPK 2/y4	1.85113	3.9299	2.77041	2.26914	4.25076	1.45036
Gabrg2 TWVLTPK 2/y5	422.75/557.37	426.76/565.38	47.7	0.507934	0.857073	0.597199	0.573662	1.12636	0.358544		Gabrg2 TWVLTPK 2/y5	2.37377	4.00543	2.79094	2.68094	5.26389	1.67561
Gabrg2 TWVLTPK 2/y6	422.75/743.45	426.76/751.46	47.7	0.440197	0.962326	0.647987	0.628292	1.11287	0.378701		Gabrg2 TWVLTPK 2/y6	2.05721	4.49732	3.02829	2.93625	5.20087	1.76981
			Average	0.448077	0.886771	0.612664	0.5625	1.0496	0.349197		Average	2.09404	4.14422	2.86321	2.62878	4.90517	1.63193
				Peak area ratio (Light/Heavy)								Protein Expression (fmol/ug total protein)
Targeted peptide ion	Q1/Q3 transition (Light)	Q1/Q3 transition (Heavy)	Retention time	CBL	FCTX	HP	MB	OB	STR		Targeted peptide ion	CBL	FCTX	HP	MB	OB	STR
Gria1 GIATPKGSAL 2/y6	457.77/572.34	461.78/580.35	39.5	2.5646	2.58229	7.29881	1.09865	1.56691	1.65243		Gria1 GIATPKGSAL 2/y6	12.2363	12.3208	34.8244	5.24191	7.4761	7.88414
Gria1 GIATPKGSAL 2/y7	457.77/673.39	461.78/681.4	39.5	2.71185	2.98243	5.20546	0.706056	1.6168	1.87562		Gria1 GIATPKGSAL 2/y7	12.9389	14.2299	24.8365	3.36877	7.71415	8.94903
Gria1 GIATPKGSAL 2/y8	457.77/744.43	461.78/752.44	39.5	2.67166	2.01255	8.13971	0.675757	1.36247	1.67503		Gria1 GIATPKGSAL 2/y8	12.7472	9.60238	38.8366	3.2242	6.50069	7.99198
Gria1 GQGIDIQRAL 2/y5	535.8/600.38	540.81/610.39	53.2	1.64029	1.58257	3.74173	0.757824	0.865901	1.11091		Gria1 GQGIDIQRAL 2/y5	7.82622	7.55085	17.8527	3.61577	4.13143	5.30044
Gria1 GQGIDIQRAL 2/y6	535.8/715.41	540.81/725.42	53.2	1.90541	1.44603	4.41825	0.377754	0.968975	0.992627		Gria1 GQGIDIQRAL 2/y6	9.09118	6.89938	21.0806	1.80236	4.62322	4.73607
Gria1 GQGIDIQRAL 2/y8	535.8/885.52	540.81/895.52	53.2	1.69031	1.16606	4.23066	0.351909	0.822983	0.948099		Gria1 GQGIDIQRAL 2/y8	8.06487	5.56356	20.1855	1.67904	3.92665	4.52362
Gria1 HVGYSYR 2/y5	441.22/645.3	446.22/655.31	29.2	2.20802	1.84896	5.39689	0.525132	0.961471	1.33997		Gria1 HVGYSYR 2/y5	10.535	8.82186	25.7499	2.50554	4.58741	6.39331
Gria1 HVGYSYR 2/y6	441.22/744.37	446.22/754.38	29.2	2.79498	2.26276	4.74495	0.503512	0.905539	1.17852		Gria1 HVGYSYR 2/y6	13.3355	10.7962	22.6393	2.40238	4.32055	5.623
Gria1 LNAILGQIVK 2/y5	534.84/544.35	538.85/552.36	65	1.63223	1.3563	4.49231	0.389403	0.797263	0.934386		Gria1 LNAILGQIVK 2/y5	7.78776	6.47126	21.4339	1.85794	3.80394	4.45819
Gria1 LNAILGQIVK 2/y6	534.84/657.43	538.85/665.44	65	1.35084	1.30389	3.96362	0.254656	0.628832	0.925281		Gria1 LNAILGQIVK 2/y6	6.44518	6.22119	18.9114	1.21503	3.00031	4.41474
Gria1 LNAILGQIVK 2/y8	534.84/841.55	538.85/849.56	65	1.59302	1.30102	4.22698	0.36897	0.735913	0.850328		Gria1 LNAILGQIVK 2/y8	7.60068	6.20748	20.168	1.76045	3.51122	4.05712
Gria1 LSEQGVLDK 2/y5	494.77/531.31	498.78/539.33	37.3	3.47031	4.67623	4.89108	0.752777	0.586326	1.4344		Gria1 LSEQGVLDK 2/y5	16.5577	22.3114	23.3366	3.59168	2.79751	6.84388
Gria1 LSEQGVLDK 2/y7	494.77/788.41	498.78/796.43	37.3	2.62129	4.80647	3.61847	0.611547	0.612232	1.30239		Gria1 LSEQGVLDK 2/y7	12.5068	22.9329	17.2646	2.91784	2.92111	6.21404
Gria1 LSEQGVLDK 2/y8	494.77/875.45	498.78/883.46	37.3	3.7089	5.82962	4.35461	0.818768	0.765446	1.94047		Gria1 LSEQGVLDK 2/y8	17.6961	27.8145	20.7769	3.90654	3.65213	9.25845
Gria1 LVVVDC[PPa]ESER 2/y5	610.3/694.28	615.31/704.29	39.7	1.59339	0.966929	4.3385	0.344439	0.734209	0.792376		Gria1 LVVVDC[PPa]ESER 2/y5	7.60248	4.61346	20.7	1.6434	3.50309	3.78062
Gria1 LVVVDC[PPa]ESER 2/y6	610.3/809.31	615.31/819.32	39.7	1.79847	1.3487	4.48184	0.34336	0.903221	1.13964		Gria1 LVVVDC[PPa]ESER 2/y6	8.58094	6.435	21.384	1.63825	4.30949	5.43753
Gria1 LVVVDC[PPa]ESER 2/y7	610.3/908.38	615.31/918.39	39.7	1.58705	1.46147	4.5683	0.351115	0.797252	1.00377		Gria1 LVVVDC[PPa]ESER 2/y7	7.57219	6.97305	21.7965	1.67526	3.80388	4.78922
Gria1 VLDTAAEK 2/y5	423.73/519.28	427.74/527.29	25.3	1.66311	1.31993	2.6818	0.537201	0.772792	1.25401		Gria1 VLDTAAEK 2/y5	7.93511	6.2977	12.7955	2.56312	3.68718	5.98319
Gria1 VLDTAAEK 2/y6	423.73/634.3	427.74/642.32	25.3	1.52404	1.59044	3.79386	0.527512	1.03946	1.0444		Gria1 VLDTAAEK 2/y6	7.27156	7.5884	18.1014	2.51689	4.9595	4.9831
Gria1 VVSQDFPK 2/y5	460.25/634.32	464.25/642.33	35.9	2.12315	2.0223	9.02001	1.96125	2.11529	1.46551		Gria1 VVSQDFPK 2/y5	10.1301	9.6489	43.0367	9.35758	10.0926	6.99232
Gria1 VVSQDFPK 2/y6	460.25/721.35	464.25/729.37	35.9	2.53265	2.25555	6.58215	0.538243	1.27259	1.38054		Gria1 VVSQDFPK 2/y6	12.0839	10.7618	31.405	2.56809	6.07186	6.58689
Gria1 VVSQDFPK 2/y7	460.25/820.42	464.25/828.43	35.9	2.82826	1.74323	6.29894	0.54339	1.31318	1.64601		Gria1 VVSQDFPK 2/y7	13.4943	8.31738	30.0538	2.59265	6.26549	7.85352
Gria1 YTSALTYDGVK 2/y6	609.31/682.34	613.31/690.35	45.5	1.60607	1.73891	4.52301	0.375253	0.748036	1.1522		Gria1 YTSALTYDGVK 2/y6	7.66297	8.29678	21.5804	1.79042	3.56906	5.49741
Gria1 YTSALTYDGVK 2/y7	609.31/795.42	613.31/803.44	45.5	1.46096	1.59071	4.02374	0.38623	0.91274	1.32971		Gria1 YTSALTYDGVK 2/y7	6.97059	7.58967	19.1982	1.8428	4.35491	6.34436
Gria1 YTSALTYDGVK 2/y9	609.31/953.49	613.31/961.51	45.5	1.38795	1.37253	4.39143	0.309694	0.736645	0.94744		Gria1 YTSALTYDGVK 2/y9	6.62225	6.54867	20.9526	1.47763	3.51472	4.52047
			Average	2.10675	2.10272	4.93708	0.576416	0.981699	1.25264		Average	10.0518	10.0326	23.556	2.75022	4.68393	5.97667
				Peak area ratio (Light/Heavy)								Protein Expression (fmol/ug total protein)
Targeted peptide ion	Q1/Q3 transition (Light)	Q1/Q3 transition (Heavy)	Retention time	CBL	FCTX	HP	MB	OB	STR		Targeted peptide ion	CBL	FCTX	HP	MB	OB	STR
Gria2 EYPGAHTATIK 2/y6	594.31/670.39	598.31/678.4	30.3	1.62733	3.98288	4.0524	0.847409	0.948078	1.60784		Gria2 EYPGAHTATIK 2/y6	8.29691	20.3067	20.6611	4.32051	4.83377	8.19754
Gria2 EYPGAHTATIK 2/y8	594.31/798.45	598.31/806.46	30.3	0.807692	2.83405	4.56141	0.92651	1.01501	1.8933		Gria2 EYPGAHTATIK 2/y8	4.11801	14.4494	23.2563	4.7238	5.175	9.65297
Gria2 EYPGAHTATIK 2/y9	594.31/895.5	598.31/903.51	30.3	1.2217	5.45477	6.00465	0.722738	1.08081	1.82961		Gria2 EYPGAHTATIK 2/y9	6.22882	27.8111	30.6146	3.68487	5.51052	9.32824
Gria2 GADQEYSAFR 2/y5	572.26/643.32	577.26/653.33	38.4	0.940593	4.24223	4.03123	0.582403	1.02135	1.72649		Gria2 GADQEYSAFR 2/y5	4.7956	21.629	20.5532	2.96937	5.20733	8.80247
Gria2 GADQEYSAFR 2/y6	572.26/772.36	577.26/782.37	38.4	1.13232	3.82314	4.08984	0.664463	1.00163	1.55151		Gria2 GADQEYSAFR 2/y6	5.77314	19.4922	20.852	3.38776	5.10682	7.91034
Gria2 GADQEYSAFR 2/y7	572.26/900.42	577.26/910.43	38.4	0.826101	2.94667	4.60211	0.611444	1.00249	1.47797		Gria2 GADQEYSAFR 2/y7	4.21187	15.0236	23.4638	3.11744	5.11118	7.53541
Gria2 GLSTLQAVLDSAAEK 2/y9	751.91/903.48	755.91/911.49	66.6	0.705888	3.22126	3.81758	0.560283	1.07056	1.77962		Gria2 GLSTLQAVLDSAAEK 2/y9	3.59896	16.4236	19.4639	2.8566	5.45824	9.07338
Gria2 GLSTLQAVLDSAAEK 3/y7	501.61/733.37	504.28/741.39	66.6	1.27357	3.53367	4.14433	0.617417	0.962871	1.89712		Gria2 GLSTLQAVLDSAAEK 3/y7	6.49328	18.0164	21.1298	3.14789	4.90919	9.67246
Gria2 GQGVEIERAL 2/y5	536.29/601.37	541.3/611.38	46.2	1.41126	4.01465	5.06953	1.15467	1.18123	1.95601		Gria2 GQGVEIERAL 2/y5	7.1953	20.4687	25.8469	5.88708	6.02248	9.97267
Gria2 GQGVEIERAL 2/y6	536.29/730.41	541.3/740.42	46.2	1.62948	5.23042	5.64648	0.903138	1.29837	2.11276		Gria2 GQGVEIERAL 2/y6	8.30787	26.6672	28.7885	4.60464	6.61973	10.7719
Gria2 GQGVEIERAL 2/y8	536.29/886.5	541.3/896.51	46.2	1.19556	4.13211	5.29956	0.747557	1.24672	1.93314		Gria2 GQGVEIERAL 2/y8	6.09556	21.0675	27.0197	3.81141	6.35638	9.85611
Gria2 LNEQGLLDK 2/y5	515.28/545.33	519.29/553.34	40.5	1.91293	4.8828	9.12594	1.21015	2.47381	3.00628		Gria2 LNEQGLLDK 2/y5	9.75304	24.8949	46.5285	6.16995	12.6127	15.3275
Gria2 LNEQGLLDK 2/y7	515.28/802.43	519.29/810.44	40.5	2.10035	4.96391	10.6457	1.25666	3.04328	3.37523		Gria2 LNEQGLLDK 2/y7	10.7086	25.3084	54.2771	6.40706	15.5161	17.2086
Gria2 LNEQGLLDK 2/y8	515.28/916.47	519.29/924.49	40.5	2.08211	4.47585	8.83676	1.25856	2.4843	3.02655		Gria2 LNEQGLLDK 2/y8	10.6156	22.8201	45.0541	6.41675	12.6662	15.4308
Gria2 VILDC[PPa]ER 2/y4	459.74/593.23	464.74/603.24	33.6	1.66794	6.57692	5.96185	0.973999	1.42237	2.60578		Gria2 VILDC[PPa]ER 2/y4	8.50397	33.5324	30.3964	4.96592	7.25192	13.2856
Gria2 VILDC[PPa]ER 2/y5	459.74/706.32	464.74/716.33	33.6	1.36563	4.29977	6.61137	0.921354	1.33875	2.47876		Gria2 VILDC[PPa]ER 2/y5	6.96265	21.9223	33.708	4.69751	6.82559	12.6379
Gria2 VILDC[PPa]ER 2/y6	459.74/819.4	464.74/829.41	33.6	1.44136	4.66559	6.17007	0.574059	1.41195	2.68269		Gria2 VILDC[PPa]ER 2/y6	7.34876	23.7875	31.458	2.92683	7.1988	13.6777
Gria2 WSTLEEK 2/y5	446.72/619.33	450.73/627.34	34.9	1.25207	4.60554	4.81876	1.03841	1.15267	2.10036		Gria2 WSTLEEK 2/y5	6.38369	23.4813	24.5684	5.29433	5.87689	10.7087
Gria2 WSTLEEK 2/y6	446.72/706.36	450.73/714.38	34.9	1.11074	4.59336	6.39785	0.905385	0.821766	2.14864		Gria2 WSTLEEK 2/y6	5.66308	23.4192	32.6194	4.61609	4.18977	10.9548
			Average	1.35288	4.34103	5.78355	0.86719	1.36726	2.16788		Average	6.89762	22.1327	29.4874	4.42136	6.97098	11.0529
				Peak area ratio (Light/Heavy)								Protein Expression (fmol/ug total protein)
Targeted peptide ion	Q1/Q3 transition (Light)	Q1/Q3 transition (Heavy)	Retention time	CBL	FCTX	HP	MB	OB	STR		Targeted peptide ion	CBL	FCTX	HP	MB	OB	STR
Gria3 ADIAVAPLTITLVR 2/y8	726.94/912.59	731.95/922.6	67.1	0.681393	2.2043	1.09111	0.317774	0.288961	0.648779		Gria3 ADIAVAPLTITLVR 2/y8	4.60841	14.9081	7.37943	2.14917	1.9543	4.38783
Gria3 ADIAVAPLTITLVR 2/y9	726.94/983.62	731.95/993.63	67.1	0.841743	2.33668	1.01518	0.396633	0.448018	0.77088		Gria3 ADIAVAPLTITLVR 2/y9	5.69288	15.8035	6.86586	2.68251	3.03004	5.21362
Gria3 ADIAVAPLTITLVR 3/y6	484.96/702.45	488.3/712.46	67.1	0.843014	2.15781	1.1224	0.321686	0.483287	0.689067		Gria3 ADIAVAPLTITLVR 3/y6	5.70148	14.5937	7.59106	2.17563	3.26857	4.6603
Gria3 AGYWNEYER 2/y4	594.26/596.27	599.26/606.28	43.7	0.636889	1.90164	0.888703	0.443828	0.304754	0.613937		Gria3 AGYWNEYER 2/y4	4.30741	12.8612	6.01048	3.0017	2.06112	4.15218
Gria3 AGYWNEYER 2/y5	594.26/710.31	599.26/720.32	43.7	0.84908	1.82329	1.00895	0.402101	0.27621	0.614607		Gria3 AGYWNEYER 2/y5	5.7425	12.3313	6.82373	2.71949	1.86807	4.15672
Gria3 AGYWNEYER 2/y6	594.26/896.39	599.26/906.4	43.7	0.690529	1.62665	1.01669	0.293685	0.211196	0.59578		Gria3 AGYWNEYER 2/y6	4.6702	11.0014	6.87609	1.98625	1.42836	4.02939
Gria3 FVYLYDTER 2/y5	603.3/683.3	608.3/693.31	52.2	0.628143	1.47417	0.789653	0.238624	0.24445	0.513724		Gria3 FVYLYDTER 2/y5	4.24826	9.97012	5.34059	1.61387	1.65326	3.47442
Gria3 FVYLYDTER 2/y6	603.3/796.38	608.3/806.39	52.2	0.531604	1.29817	0.771917	0.286615	0.271558	0.481918		Gria3 FVYLYDTER 2/y6	3.59535	8.77983	5.22064	1.93844	1.8366	3.25932
Gria3 GAILSLLGYYK 2/y5	599.35/643.34	603.35/651.36	67.4	0.612393	1.55581	0.802639	0.210557	0.45778	0.754375		Gria3 GAILSLLGYYK 2/y5	4.14174	10.5223	5.42842	1.42404	3.09606	5.102
Gria3 GAILSLLGYYK 2/y7	599.35/843.46	603.35/851.48	67.4	0.660241	1.73308	0.794481	0.263873	0.251197	0.557063		Gria3 GAILSLLGYYK 2/y7	4.46535	11.7212	5.37324	1.78463	1.6989	3.76754
Gria3 GAILSLLGYYK 2/y8	599.35/956.55	603.35/964.56	67.4	0.622881	1.4296	0.804585	0.273904	0.232298	0.631355		Gria3 GAILSLLGYYK 2/y8	4.21267	9.66869	5.44158	1.85247	1.57108	4.26999
Gria3 NHEQLEGNER 3/b4	409.19/509.21	412.53/509.21	22.7	0.792652	2.11019	0.972451	0.371546	0.338903	0.85566		Gria3 NHEQLEGNER 3/b4	5.36087	14.2717	6.57689	2.51285	2.29207	5.78701
Gria3 NHEQLEGNER 3/y4	409.19/475.23	412.53/485.23	22.7	0.633891	1.67674	0.89373	0.3552	0.280144	0.620387		Gria3 NHEQLEGNER 3/y4	4.28714	11.3401	6.04449	2.40229	1.89467	4.19581
Gria3 NHEQLEGNER 3/y5	409.19/604.27	412.53/614.28	22.7	0.703984	1.3108	0.846891	0.390935	0.225036	0.592865		Gria3 NHEQLEGNER 3/y5	4.76119	8.86521	5.7277	2.64398	1.52197	4.00967
Gria3 NTVQEHSAFR 2/y6	594.79/746.36	599.8/756.37	28.1	0.701952	1.21357	0.976457	0.456429	0.34568	0.49734		Gria3 NTVQEHSAFR 2/y6	4.74745	8.20762	6.60399	3.08693	2.33791	3.36362
Gria3 NTVQEHSAFR 2/y7	594.79/874.42	599.8/884.42	28.1	0.554553	1.61744	0.783017	0.235448	0.328891	0.532864		Gria3 NTVQEHSAFR 2/y7	3.75056	10.9391	5.29571	1.59238	2.22436	3.60387
Gria3 NTVQEHSAFR 2/y8	594.79/973.49	599.8/983.49	28.1	0.734719	1.70472	0.728549	0.250825	0.316672	0.419005		Gria3 NTVQEHSAFR 2/y8	4.96906	11.5294	4.92733	1.69638	2.14172	2.83382
Gria3 RFAVQLY 2/b4	448.75/474.28	453.76/484.29	55.3	0.648258	1.79208	0.88632	0.25353	0.254757	0.362879		Gria3 RFAVQLY 2/b4	4.38431	12.1202	5.99437	1.71468	1.72298	2.45423
Gria3 RFAVQLY 2/b5	448.75/602.34	453.76/612.35	55.3	0.607104	1.48869	0.779463	0.280577	0.254718	0.488731		Gria3 RFAVQLY 2/b5	4.10597	10.0683	5.27167	1.8976	1.72271	3.30539
Gria3 RFAVQLY 2/b6	448.75/715.42	453.76/725.43	55.3	0.558179	1.76842	0.588961	0.232242	0.237487	0.580815		Gria3 RFAVQLY 2/b6	3.77508	11.9602	3.98327	1.5707	1.60618	3.92817
Gria3 SQGIDIERAL 2/y5	551.3/601.37	556.3/611.38	53.8	0.790733	1.72076	0.747887	0.215479	0.260731	0.656644		Gria3 SQGIDIERAL 2/y5	5.3479	11.6379	5.05812	1.45733	1.76338	4.44102
Gria3 SQGIDIERAL 2/y6	551.3/716.39	556.3/726.4	53.8	0.72838	1.94826	0.96964	0.335004	0.272716	0.583852		Gria3 SQGIDIERAL 2/y6	4.92618	13.1765	6.55788	2.2657	1.84443	3.94871
Gria3 SQGIDIERAL 2/y8	551.3/886.5	556.3/896.51	53.8	0.696511	1.50945	0.936426	0.273274	0.22938	0.5674		Gria3 SQGIDIERAL 2/y8	4.71065	10.2087	6.33325	1.84821	1.55135	3.83744
Gria3 YLIDC[PPa]EVER 2/y5	605.79/706.32	610.8/716.33	45.7	0.591454	1.74157	0.83973	0.270826	0.27802	0.527369		Gria3 YLIDC[PPa]EVER 2/y5	4.00013	11.7786	5.67927	1.83165	1.88031	3.56671
Gria3 YLIDC[PPa]EVER 2/y6	605.79/821.35	610.8/831.35	45.7	0.635694	1.56714	0.821635	0.292201	0.225088	0.453059		Gria3 YLIDC[PPa]EVER 2/y6	4.29933	10.5989	5.55689	1.97621	1.52232	3.06413
Gria3 YLIDC[PPa]EVER 2/y7	605.79/934.43	610.8/944.44	45.7	0.674711	1.6526	0.971899	0.367182	0.300464	0.620443		Gria3 YLIDC[PPa]EVER 2/y7	4.56321	11.1769	6.57316	2.48333	2.0321	4.19619
			Average	0.678872	1.70629	0.878822	0.308845	0.293015	0.5858		Average	4.59136	11.54	5.94366	2.08879	1.98172	3.96189
				Peak area ratio (Light/Heavy)								Protein Expression (fmol/ug total protein)
Targeted peptide ion	Q1/Q3 transition (Light)	Q1/Q3 transition (Heavy)	Retention time	CBL	FCTX	HP	MB	OB	STR		Targeted peptide ion	CBL	FCTX	HP	MB	OB	STR
Gria4 LQNILEQIVSVGK 2/y7	720.92/730.45	724.93/738.46	68.2	1.26834	ND	0.0758863	0.396853	0.267042	0.363955		Gria4 LQNILEQIVSVGK 2/y7	12.3856	ND	0.741042	3.87534	2.60771	3.55409
Gria4 LQNILEQIVSVGK 2/y8	720.92/859.49	724.93/867.5	68.2	0.745194	0.221405	0.111758	0.207685	0.175895	0.134746		Gria4 LQNILEQIVSVGK 2/y8	7.27695	2.16205	1.09134	2.02808	1.71764	1.31582
Gria4 LQNILEQIVSVGK 2/y9	720.92/972.57	724.93/980.59	68.2	0.856685	0.24145	0.108258	0.170912	0.166931	0.110568		Gria4 LQNILEQIVSVGK 2/y9	8.36567	2.3578	1.05716	1.66898	1.63011	1.07971
Gria4 GKAEIAIAPL 2/b6	491.8/570.32	495.81/578.34	57.1	0.994599	0.24538	ND	0.189856	0.135372	0.0785503		Gria4 GKAEIAIAPL 2/b6	9.71242	2.39617	ND	1.85398	1.32193	0.767057
Gria4 GKAEIAIAPL 2/b7	491.8/683.41	495.81/691.42	57.1	1.04622	0.218546	ND	0.164307	0.168223	0.0787647		Gria4 GKAEIAIAPL 2/b7	10.2165	2.13414	ND	1.60449	1.64272	0.76915
Gria4 GKAEIAIAPL 2/b8	491.8/754.45	495.81/762.46	57.1	1.01456	0.241502	ND	0.153088	0.155204	0.101371		Gria4 GKAEIAIAPL 2/b8	9.90739	2.35831	ND	1.49493	1.51559	0.989908
Gria4 LYDTDRGY 2/y5	501.73/611.28	506.73/621.29	34.9	1.53556	0.317356	0.316828	ND	0.280929	0.335903		Gria4 LYDTDRGY 2/y5	14.995	3.09904	3.09388	ND	2.74332	3.28015
Gria4 LYDTDRGY 2/y6	501.73/726.31	506.73/736.31	34.9	1.00133	0.225719	0.0966696	0.454335	0.16677	0.166555		Gria4 LYDTDRGY 2/y6	9.7782	2.20419	0.943995	4.43666	1.62854	1.62644
Gria4 LYDTDRGY 2/y7	501.73/889.37	506.73/899.38	34.9	0.753657	0.121069	0.14569	0.286231	0.106267	0.0757254		Gria4 LYDTDRGY 2/y7	7.35959	1.18226	1.42268	2.7951	1.03772	0.739471
Gria4 RQLLEEL 2/b4	450.76/511.34	455.77/521.34	55.7	0.904805	0.98502	0.134418	0.207628	0.131813	0.118494		Gria4 RQLLEEL 2/b4	8.83558	9.61889	1.31261	2.02753	1.28718	1.15711
Gria4 RQLLEEL 2/b5	450.76/640.38	455.77/650.39	55.7	0.850953	0.106201	0.0935361	0.156535	0.175256	0.0813381		Gria4 RQLLEEL 2/b5	8.3097	1.03707	0.913396	1.52859	1.7114	0.79428
Gria4 RQLLEEL 2/b6	450.76/769.42	455.77/779.43	55.7	0.660417	0.155873	0.157955	0.164048	0.149807	0.093119		Gria4 RQLLEEL 2/b6	6.44908	1.52212	1.54246	1.60195	1.46289	0.909323
Gria4 RTPVNLAVL 2/b5	491.81/568.32	496.81/578.33	59.6	0.905172	0.432346	0.484903	0.0855023	0.162312	0.234449		Gria4 RTPVNLAVL 2/b5	8.83916	4.22193	4.73516	0.834945	1.585	2.28943
Gria4 RTPVNLAVL 2/b6	491.81/681.4	496.81/691.41	59.6	1.44721	0.591816	0.671952	ND	0.23648	0.488636		Gria4 RTPVNLAVL 2/b6	14.1322	5.77918	6.56173	ND	2.30927	4.77162
Gria4 RTPVNLAVL 2/b7	491.81/752.44	496.81/762.45	59.6	0.736938	0.379524	0.337479	0.0494152	0.10285	0.151766		Gria4 RTPVNLAVL 2/b7	7.19632	3.70611	3.29554	0.482548	1.00435	1.48202
			Average	0.981443	0.320229	0.227944	0.206646	0.172077	0.174263		Average	9.58396	3.12709	2.22592	2.01793	1.68036	1.7017
				Peak area ratio (Light/Heavy)								Protein Expression (fmol/ug total protein)
Targeted peptide ion	Q1/Q3 transition (Light)	Q1/Q3 transition (Heavy)	Retention time	CBL	FCTX	HP	MB	OB	STR		Targeted peptide ion	CBL	FCTX	HP	MB	OB	STR
Grin1 ADGVTGRVEF 2/y5	525.76/607.32	530.77/617.33	47.1	1.82659	5.34185	6.26295	1.20274	1.98747	3.05763		Grin1 ADGVTGRVEF 2/y5	2.48396	7.26435	8.51694	1.6356	2.70275	4.15805
Grin1 ADGVTGRVEF 2/y6	525.76/708.37	530.77/718.38	47.1	1.90172	6.51073	8.19232	1.39867	2.11166	2.63345		Grin1 ADGVTGRVEF 2/y6	2.58613	8.8539	11.1407	1.90205	2.87163	3.58121
Grin1 ADGVTGRVEF 2/y8	525.76/864.46	530.77/874.47	47.1	1.48079	5.08583	7.80074	1.86258	2.48018	2.73865		Grin1 ADGVTGRVEF 2/y8	2.01372	6.91618	10.6082	2.53291	3.37278	3.72427
Grin1 C[PPa]DLVTTGELFFR 2/y6	736.37/768.4	741.37/778.41	67.7	1.00907	3.64499	3.26141	0.915822	1.31059	1.33651		Grin1 C[PPa]DLVTTGELFFR 2/y6	1.37223	4.95679	4.43517	1.24542	1.78226	1.81751
Grin1 C[PPa]DLVTTGELFFR 2/y7	736.37/869.45	741.37/879.46	67.7	1.35454	4.44302	7.06647	1.10547	2.67924	3.52922		Grin1 C[PPa]DLVTTGELFFR 2/y7	1.84203	6.04204	9.60964	1.50332	3.64348	4.79936
Grin1 C[PPa]DLVTTGELFFR 2/y8	736.37/970.5	741.37/980.51	67.7	1.70187	10.4892	8.90039	1.94878	3.35083	4.10611		Grin1 C[PPa]DLVTTGELFFR 2/y8	2.31436	14.2642	12.1036	2.65014	4.55676	5.58387
Grin1 HNYESAAEAIQAVR 3/y4	520.26/473.28	523.59/483.29	48.6	1.85886	6.24729	7.78558	1.68138	2.85839	2.98516		Grin1 HNYESAAEAIQAVR 3/y4	2.52786	8.49564	10.5875	2.28649	3.8871	4.0595
Grin1 HNYESAAEAIQAVR 3/y5	520.26/586.37	523.59/596.38	48.6	2.38477	7.69446	9.10509	1.35272	2.97873	3.40058		Grin1 HNYESAAEAIQAVR 3/y5	3.24303	10.4636	12.3819	1.83955	4.05075	4.62442
Grin1 HNYESAAEAIQAVR 3/y6	520.26/657.4	523.59/667.41	48.6	2.39923	9.06864	11.2163	1.9576	4.19708	4.29723		Grin1 HNYESAAEAIQAVR 3/y6	3.2627	12.3324	15.2529	2.66213	5.70758	5.84377
Grin1 IPVLGLTTR 2/y5	485.31/547.32	490.31/557.33	58.1	1.22664	4.19747	4.97798	1.29795	1.36098	2.1347		Grin1 IPVLGLTTR 2/y5	1.6681	5.7081	6.76951	1.76507	1.85078	2.90296
Grin1 IPVLGLTTR 2/y6	485.31/660.4	490.31/670.41	58.1	0.76679	3.4786	4.09778	0.799844	1.03351	1.55736		Grin1 IPVLGLTTR 2/y6	1.04275	4.73052	5.57253	1.0877	1.40546	2.11784
Grin1 IPVLGLTTR 2/y7	485.31/759.47	490.31/769.48	58.1	0.99807	4.21656	4.08619	0.949745	1.1527	1.68882		Grin1 IPVLGLTTR 2/y7	1.35727	5.73407	5.55678	1.29155	1.56755	2.29662
Grin1 ITGINDPR 2/y6	443.24/671.35	448.25/681.36	32.4	2.19387	9.1606	10.7964	1.88397	2.6066	3.55119		Grin1 ITGINDPR 2/y6	2.98343	12.4574	14.682	2.56199	3.54469	4.82923
Grin1 ITGINDPR 2/y7	443.24/772.39	448.25/782.4	32.4	1.33885	10.0273	12.1378	2.51831	2.4305	4.49208		Grin1 ITGINDPR 2/y7	1.82069	13.636	16.5061	3.42463	3.30522	6.10875
Grin1 TINNERAQY 2/y5	554.77/666.32	559.78/676.33	29.3	0.505666	3.29125	6.66429	1.32246	1.6471	2.30171		Grin1 TINNERAQY 2/y5	0.687651	4.47575	9.06272	1.79841	2.23988	3.13008
Grin1 TINNERAQY 2/y6	554.77/780.36	559.78/790.37	29.3	4.07384	10.3629	10.6503	2.61076	3.58143	2.27842		Grin1 TINNERAQY 2/y6	5.53998	14.0925	14.4833	3.55035	4.87036	3.0984
Grin1 TINNERAQY 2/y7	554.77/894.41	559.78/904.41	29.3	1.77533	8.33857	8.07433	1.6232	2.33375	3.37815		Grin1 TINNERAQY 2/y7	2.41425	11.3396	10.9802	2.20738	3.17365	4.59392
Grin1 YADGVTGR 2/y5	419.71/489.28	424.71/499.29	26	1.59826	4.74127	7.95087	1.38351	1.87617	3.11025		Grin1 YADGVTGR 2/y5	2.17347	6.44762	10.8123	1.88143	2.55139	4.22961
Grin1 YADGVTGR 2/y6	419.71/604.3	424.71/614.31	26	1.30782	7.08734	6.34296	1.28682	1.69629	2.77618		Grin1 YADGVTGR 2/y6	1.77849	9.63802	8.62575	1.74993	2.30678	3.77531
Grin1 YADGVTGR 2/y7	419.71/675.34	424.71/685.35	26	2.08037	7.34417	7.93693	1.67668	2.34867	2.29967		Grin1 YADGVTGR 2/y7	2.82907	9.98729	10.7934	2.2801	3.19394	3.12731
Grin1 YQEC[PPa]DSR 2/y4	486.2/551.22	491.2/561.23	20.5	2.50361	10.604	9.36823	1.557	3.42709	5.05814		Grin1 YQEC[PPa]DSR 2/y4	3.40463	14.4203	12.7398	2.11735	4.66047	6.87852
Grin1 YQEC[PPa]DSR 2/y5	486.2/680.27	491.2/690.28	20.5	2.35566	10.4361	11.4392	1.45479	2.00496	5.16573		Grin1 YQEC[PPa]DSR 2/y5	3.20345	14.1919	15.5561	1.97835	2.72653	7.02484
Grin1 YQEC[PPa]DSR 2/y6	486.2/808.33	491.2/818.33	20.5	1.61988	9.64414	10.6509	3.12594	3.04986	3.13381		Grin1 YQEC[PPa]DSR 2/y6	2.20286	13.115	14.4841	4.25095	4.14749	4.26164
			Average	1.75053	7.01984	8.03328	1.60508	2.36973	3.08742		Average	2.38053	9.54622	10.9244	2.18273	3.22258	4.19856

## Sheet: Tabke S7
Table S7. MRM3 experimental parameters in QTRAP 5500.
Targeted peptides	1st Precursor ion (m/z)	2nd Precursor ion (m/z)	MS3 fragment ion (m/z)	Collision energy (eV)	Excitation energy
GFP: FIC[PPa]TTGK [Light]	420.72	580.28	305	23.5	0.1
GFP: FIC[PPa]TTGK [Heavy]	424.72	588.29	313.1	23.5	0.1
GFP: SAMPEGYVQER [Light]	633.79	977.47	751.3	33.5	0.12
GFP: SAMPEGYVQER [Heavy]	638.8	987.48	761.4	33.5	0.12
GUS: IEAIPQIDK [Light]	513.8	600.34	375.1	27	0.1
GUS: IEAIPQIDK [Heavy]	517.8	608.35	383.3	27	0.1
GUS: EYFAPLAEATR [Light]	634.32	757.42	739.4	31	0.1
GUS: EYFAPLAEATR [Heavy]	639.32	767.43	749.4	31	0.1
